# Supplementary material for: Pitfalls in metal–organic framework crystallography: towards more accurate crystal structures
Source: Royal Society of Chemistry journal article supplement (doi:10.1039/c6cs00533k), 2017-01-01
Supplement: c6cs00533k1.xlsx [file c6cs00533k1.xlsx]

## Sheet: LDMOF
[REFCODE]	[_publ_authors]	[_journal_name_full]	[_journal_year]	[_chemical_formula_moiety]	[_chemical_name_systematic]	[_chemical_name_common]	[_exptl_crystal_colour]	[_symmetry_space_group_name]	[_symmetry_Int_Tables_number]	[_exptl_crystal_description]	[_refine_ls_R_factor]	[_cell_measurement_temperature]	[_exptl_crystal_density_CCDC]	[_exptl_crystal_density_diffrn]	[_exptl_DISORDER]	[_exptl_QUAL]	[_ccdc_REMARK]	[_ccdc_QUAL]
ACOCOM	U.Stoeck, S.Krause, V.Bon, I.Senkovska, S.Kaskel	Chem.Commun.	2012	(C40 H24 Cu2 N2 O10)n,5.2n(C5 H9 N1 O1)	catena-[(mu!8$-9,9'-Biphenyl-4,4'-diylbis(9H-carbazole-3,6-dicarboxylato))-diaqua-di-copper(ii) N-methyl-2-pyrrolidone solvate]	DUT-49(Cu)	green	Fm-3m	225	cubic	6.3	296	0.526	0	C9,C10 disordered by symmetry over two sites with occupancy 0.50. Disordered solvent molecules were not modelled and the disordered density was taken into account using the SQUEEZE/PLATON procedure. The unit cell was found to contain a void of 84702 A$3! holding 6728 electrons.	synchrotron radiation; at 296 K		TEMP: at 296 K RADIATION: synchrotron radiation
ACOCUS	U.Stoeck, S.Krause, V.Bon, I.Senkovska, S.Kaskel	Chem.Commun.	2012	(C40 H24 N2 O10 Zn2)n,5.3n(C5 H9 N1 O1)	catena-[(mu!8$-9,9'-Biphenyl-4,4'-diylbis(9H-carbazole-3,6-dicarboxylato))-diaqua-di-zinc(ii) N-methyl-2-pyrrolidone solvate]	DUT-49(Zn)	colorless	Fm-3m	225	cubic	5.48	296	0.524	0	C9,C10 disordered by symmetry over two sites with occupancy 0.50. Disordered solvent molecules were not modelled and the disordered density was taken into account using the SQUEEZE/PLATON procedure. The unit cell was found to contain a void of 85919 A$3! holding 6866 electrons.	synchrotron radiation; at 296 K		TEMP: at 296 K RADIATION: synchrotron radiation
ACODAZ	U.Stoeck, S.Krause, V.Bon, I.Senkovska, S.Kaskel	Chem.Commun.	2012	(C40 H24 Co2 N2 O10)n,4.6n(C5 H9 N1 O1)	catena-[(mu!8$-9,9'-Biphenyl-4,4'-diylbis(9H-carbazole-3,6-dicarboxylato))-diaqua-di-cobalt(ii) N-methyl-2-pyrrolidone solvate]	DUT-49(Co)	purple	Fm-3m	225	cubic	7.98	296	0.495	0	C9,C10 disordered by symmetry over two sites with occupancy 0.50. Disordered solvent molecules were not modelled and the disordered density was taken into account using the SQUEEZE/PLATON procedure. The unit cell was found to contain a void of 85584 A$3! holding 5992 electrons.	synchrotron radiation; at 296 K	Study temperature given as 263 K and 296 K in the CIF	TEMP: at 296 K RADIATION: synchrotron radiation
ACUFEK	Daofeng Sun, Shengqian Ma, Yanxiong Ke, D.J.Collins, Hong-Cai Zhou	J.Am.Chem.Soc.	2006	(C192 H120 Cu12 N24 O60)n,12n(C2 H6 O1 S1),44n(H2 O1)	catena-(octakis(mu!6$-4,4',4''-s-Triazine-2,4,6-triyltribenzoato)-dodeca-aqua-dodeca-copper dimethylsulfoxide solvate hydrate)	PCN-6	blue	R-3m	166	block	5.3	293	0.814	0	Four of the water molecules and two of the dimethylsulfoxide solvent molecules are disordered. All the solvent molecules were taken into account using PLATON/SQUEEZE.	at 293 K		TEMP: at 293 K COLOR: blue "HABIT: block
ACUJOZ	Wei Wei, Zhengqiang Xia, Qing Wei, Gang Xie, Sanping Chen, Chengfang Qiao, Guochun Zhang, Chunsheng Zhou	Microporous and Mesoporous Materials	2013	(C36 H24 Cr1 Cu3 O20)n	catena-(bis(trans-stilbene-3,3',5,5'-tetracarboxylato)-tetraaqua-tri-copper-chromium guest clathrate)		blue	R-3	148	block	22.76	293	0.76	0.742	Disordered solvent guest molecules were not modelled and the disordered density was taken into account using the SQUEEZE/PLATON procedure.	at 293 K	Large structure in which program limits have been exceeded. A full set of coordinates are available from the deposited CIF	TEMP: at 293 K COLOR: blue "HABIT: block
ADACAL	Dae-Woon Lim, Ji Woong Yoon, Keun Yong Ryu, Myunghyun Paik Suh	Angew.Chem.,Int.Ed.	2012	(C189 H122 N7 O44 Zn9)n	catena-((mu!8$-oxo)-(mu!5$-aniline 2,4,6-tribenzoato)-hexakis(mu!3$-aniline 2,4,6-tribenzoato)-nona-zinc)		yellow	P-31c	163	prism	11.49	150	0.35	0	Sections of the structure are severly disordered by symmetry with occupancies of 0.503:0.497, 0.523:0.477,0.5192:0.4808, 0.510:0.490 and 0.5:0.5.		Large structure in which program limits have been exceeded. A full set of coordinates are available from the deposited CIF	TEMP: at 150 K COLOR: yellow "HABIT: prism
ADASAB	J.F.Eubank, F.Nouar, R.Luebke, A.J.Cairns, L.Wojtas, M.Alkordi, T.Bousquet, M.R.Hight, J.Eckert, J.P.Embs, P.A.Georgiev, M.Eddaoudi	Angew.Chem.,Int.Ed.	2012	(C196 H106 Cu22 N36 O74 1+)n,n(H2 O1),n(N1 O3 1-)	catena-(dodecakis(mu!6$-5'-(1H-tetrazol-5-yl)-1,1':3',1''-terphenyl-4,4''-dicarboxylato)-tetrakis(mu!3$-oxo)-hexatriaconta-aqua-tetracosa-copper nitrate monohydrate)		green	Fm-3m	225	polyhedra	11.29	100	0.286	0	The SQUEEZE/PLATON program has been used to model some disorder.		Large structure in which program limits have been exceeded. A full set of coordinates are available from the deposited CIF	TEMP: at 100 K COLOR: green "HABIT: polyhedra
ADASEF	J.F.Eubank, F.Nouar, R.Luebke, A.J.Cairns, L.Wojtas, M.Alkordi, T.Bousquet, M.R.Hight, J.Eckert, J.P.Embs, P.A.Georgiev, M.Eddaoudi	Angew.Chem.,Int.Ed.	2012	(C180 H132 Cu24 N48 O76)n	catena-(dodecakis(mu!6$-4'-(1H-tetrazol-5-yl)biphenyl-3,5-dicarboxylato)-tetrakis(mu!3$-oxo)-tetracosa-aqua-tetracosa-copper)		green	Fm-3m	225	polyhedra	13.72	100	0.471	0.467			Large structure in which program limits have been exceeded. A full set of coordinates are available from the deposited CIF	TEMP: at 100 K COLOR: green "HABIT: polyhedra
ADASIJ	J.F.Eubank, F.Nouar, R.Luebke, A.J.Cairns, L.Wojtas, M.Alkordi, T.Bousquet, M.R.Hight, J.Eckert, J.P.Embs, P.A.Georgiev, M.Eddaoudi	Angew.Chem.,Int.Ed.	2012	(C66 H48 Cu6 O36)n	catena-((mu!12$-5,5',5''-(Benzene-1,3,5-triyltris(methyleneoxy))-tri-isophthalato)-hexa-aqua-hexa-copper)		green	Fm-3	202	octahedron	11.53	100	0.669	0.665	The SQUEEZE/PLATON program has been used to model some disorder.			TEMP: at 100 K COLOR: green "HABIT: octahedron
ADASOP	J.F.Eubank, F.Nouar, R.Luebke, A.J.Cairns, L.Wojtas, M.Alkordi, T.Bousquet, M.R.Hight, J.Eckert, J.P.Embs, P.A.Georgiev, M.Eddaoudi	Angew.Chem.,Int.Ed.	2012	(C78 H68 N4 O36 Zn6)n	catena-(bis(mu!12$-5,5',5''-(1,3,5-benzenetriyltris(methyleneoxy))-tris(1,3-benzenedicarboxylato))-tetrakis(dimethylformamide)-diaqua-hexa-zinc)		green	I4/m	87	block	6.84	100	0.754	0	The SQUEEZE/PLATON program has been used to model some disorder.		Large structure in which program limits have been exceeded. A full set of coordinates are available from the deposited CIF	TEMP: at 100 K COLOR: green "HABIT: block
ADASUV	J.F.Eubank, F.Nouar, R.Luebke, A.J.Cairns, L.Wojtas, M.Alkordi, T.Bousquet, M.R.Hight, J.Eckert, J.P.Embs, P.A.Georgiev, M.Eddaoudi	Angew.Chem.,Int.Ed.	2012	(C66 H48 Co6 O36)n	catena-(bis(mu!12$-5,5',5''-(1,3,5-benzenetriyltris(methyleneoxy))-tris(1,3-benzenedicarboxylato))-hexa-aqua-hexa-cobalt)		green	I4/m	87	block	12.4	100	0.654	0	The SQUEEZE/PLATON program has been used to model some disorder.		Large structure in which program limits have been exceeded. A full set of coordinates are available from the deposited CIF	TEMP: at 100 K COLOR: green "HABIT: block
ADATAC	J.F.Eubank, F.Nouar, R.Luebke, A.J.Cairns, L.Wojtas, M.Alkordi, T.Bousquet, M.R.Hight, J.Eckert, J.P.Embs, P.A.Georgiev, M.Eddaoudi	Angew.Chem.,Int.Ed.	2012	(C102 H72 N12 O36 Zn6)n	catena-(bis(mu!12$-5,5',5''-(Benzene-1,3,5-triyltris(methyleneoxy-4,1-phenylenediazene-2,1-diyl))triisophthalato)-hexa-aqua-hexa-zinc)		green	Fm-3	202	block	9.17	100	0.353	0.351	The SQUEEZE/PLATON program has been used to model some disorder.		Large structure in which program limits have been exceeded. A full set of coordinates are available from the deposited CIF	TEMP: at 100 K COLOR: green "HABIT: block
ADATEG	J.F.Eubank, F.Nouar, R.Luebke, A.J.Cairns, L.Wojtas, M.Alkordi, T.Bousquet, M.R.Hight, J.Eckert, J.P.Embs, P.A.Georgiev, M.Eddaoudi	Angew.Chem.,Int.Ed.	2012	(C84 H51 Cu3 N1 O15)n	catena-((mu!12$-tris(4-(5'-ethynyl-1,1':3''.1''-terphenyl-4,4''-dicarboxylic acid)phenyl)amine)-tri-aqua-tri-copper unknown solvate)		green	Fm-3m	225	polyhedral	11.22	100	0.248	0.247	The SQUEEZE/PLATON program has been used to model some disorder.		Large structure in which program limits have been exceeded. A full set of coordinates are available from the deposited CIF	TEMP: at 100 K COLOR: green "HABIT: polyhedral
ADATIK	J.F.Eubank, F.Nouar, R.Luebke, A.J.Cairns, L.Wojtas, M.Alkordi, T.Bousquet, M.R.Hight, J.Eckert, J.P.Embs, P.A.Georgiev, M.Eddaoudi	Angew.Chem.,Int.Ed.	2012	(C96 H96 Cu12 N30 O56)n	catena-(hexakis(mu!6$-5'-(4-(1H-tetrazol-5-yl)benzamido)benzene-1,3-dioato)-bis(mu!3$-oxo)-tetracosa-aqua-dodeca-copper)		green	I4/m	87	polyhedron	6.24	100	0.434	0.428	The SQUEEZE/PLATON program has been used to model some disorder.		Large structure in which program limits have been exceeded. A full set of coordinates are available from the deposited CIF	TEMP: at 100 K COLOR: green "HABIT: polyhedron
ADATUW	Xu Jing, Cheng He, Dapeng Dong, Linlin Yang, Chunying Duan	Angew.Chem.,Int.Ed.	2012	(C39 H36 Ag1 N10 1+)n,n(B1 F4 1-),n(C2 H3 N1),n(C1 H2 Cl2),n(H2 O1)	catena-((mu!3$-tris(4-(1-(2-pyridin-2-ylhydrazono)ethyl)-phenyl)amine)-silver tetrafluoroborate acetonitrile dichloromethane solvate monohydrate)		yellow	I213	199	block	7.83	180	0.391	0	The anion and solvent are disordered.			TEMP: at 180 K COLOR: yellow "HABIT: block
ADAVAE	Xu Jing, Cheng He, Dapeng Dong, Linlin Yang, Chunying Duan	Angew.Chem.,Int.Ed.	2012	(C39 H36 Ag1 N10 1+)n,n(B1 F4 1-),n(C1 H2 Cl2),n(C3 H7 N1 O1),n(H2 O1)	catena-((mu!3$-tris(4-(1-(2-pyridin-2-ylhydrazono)ethyl)-phenyl)amine)-silver tetrafluoroborate dichloromethane N,N-dimethylformamide solvate monohydrate)		yellow	I213	199	block	7.77	180	0.413	0	B1,Cl2,F1,F1',F2,F2',F3,F3' disordered by symmetry over three sites with occupancy 0.33; B1,F1,F1',F2,F2',F3,F3' disordered by symmetry over three sites with occupancy 0.33; C18,C19,N6 and C16,C17,N5 disordered over two sites with occupancies 0.470:0.530.			TEMP: at 180 K COLOR: yellow "HABIT: block
ADAVEI	Xu Jing, Cheng He, Dapeng Dong, Linlin Yang, Chunying Duan	Angew.Chem.,Int.Ed.	2012	(C39 H36 Ag1 N10 1+)n,n(B1 F4 1-),n(C3 H7 N1 O1),n(C2 H3 N1),2n(H2 O1)	catena-((mu!3$-tris(4-(1-(2-pyridin-2-ylhydrazono)ethyl)-phenyl)amine)-silver tetrafluoroborate acetonitrile N,N-dimethylformamide solvate dihydrate)		yellow	I213	199	block	8.77	180	0.403	0	B1,Cl2,F1,F1',F2,F2',F3,F3' disordered by symmetry over three sites with occupancy 0.33; B1,F1,F1',F2,F2',F3,F3' disordered by symmetry over three sites with occupancy 0.33.			TEMP: at 180 K COLOR: yellow "HABIT: block
ADAVIM	Xu Jing, Cheng He, Dapeng Dong, Linlin Yang, Chunying Duan	Angew.Chem.,Int.Ed.	2012	(C39 H36 Ag1 N10 1+)n,n(B1 F4 1-),n(C10 H12 N1 O2),n(C1 H2 Cl2),n(H2 O1)	catena-((mu!3$-tris(4-(1-(2-pyridin-2-ylhydrazono)ethyl)-phenyl)amine)-silver tetrafluoroborate methyl-2-(benzylideneamino) acetate acetonitrile dichloromethane solvate monohydrate)		yellow	I213	199	block	8.66	180	0.445	0	B1,B1,B1,B1,Cl2,F1,F2,F2,F3,F3,F3,F3 disordered by symmetry over three sites with occupancy 0.33; B1,B1,F1,F2,F3,F3 disordered by symmetry over three sites with occupancy 0.33; O1W disordered by symmetry over two sites with occupancy 0.25.			TEMP: at 180 K COLOR: yellow "HABIT: block
ADUROI	Ruirui Yun, Zhiyong Lu, Yi Pan, Xiaozeng You, Junfeng Bai	Angew.Chem.,Int.Ed.	2013	(C21 H15 N3 O7 Zn1)n,n(C3 H7 N1 O1),3.5n(H2 O1)	catena-[(mu!3$-4,4'-(Pyridine-3,5-diylbis(carbonylimino))dibenzoato)-aqua-zinc(ii) N,N-dimethylformamide unknown solvate hydrate]	NJU-Bai9		Fd-3c	228		11.22	293	0.535	0.416	Disordered solvent molecules were not modelled and the disordered density was taken into account using the SQUEEZE/PLATON procedure.	293 K	We calculate 79% void space in the structure	TEMP: 293 K SENS: air-sensitive
ADUWIH	Yun Wang, Jin Yang, Ying-Ying Liu, Jian-Fang Ma	Chem.-Eur.J.	2013	(C54 H40 O20 Zn3)n,3n(C3 H7 N1 O1),7n(H2 O1)	catena-[(mu!12$-3,3',3'',3''',3'''',3'''''-(Benzene-1,2,3,4,5,6-hexaylhexakis(methyleneoxy))hexabenzoato)-diaqua-tri-zinc(ii) N,N-dimethylformamide solvate heptahydrate]	MOF-1	colorless	Pn-3	201	block	4.9	293	0.958	0.958	Disordered N,N-dimethylformamide and water solvent molecules were not modelled and the disordered density was taken into account using the SQUEEZE/PLATON procedure.	at 293 K		TEMP: at 293 K COLOR: colorless "HABIT: block
ADUWON	Yun Wang, Jin Yang, Ying-Ying Liu, Jian-Fang Ma	Chem.-Eur.J.	2013	(C108 H84 Ni3 O42 6-)n,3n(C3 H7 N1 O1),15n(H2 O1),6n(C2 H8 N1 1+)	catena-[hexakis(dimethylammonium) bis(mu!6$-3,3',3'',3''',3'''',3'''''-(benzene-1,2,3,4,5,6-hexaylhexakis(methyleneoxy))hexabenzoato)-hexa-aqua-tri-nickel(ii) N,N-dimethylformamide solvate pentadecahydrate]	MOF-2	green	Im-3m	229	block	9.9	293	0.736	0.736	Disordered cation and solvent molecules were not modelled and the disordered density was taken into account using the SQUEEZE/PLATON procedure.	at 293 K		TEMP: at 293 K COLOR: green "HABIT: block
AFITOZ	T.Gadzikwa, Bi-Shun Zeng, J.T.Hupp, S.T.Nguyen	Chem.Commun.	2008	(C46 H32 N2 O12 Zn2)n	catena-[bis(mu!4$-4,4'-Ethyne-1,2-diylbis(3-hydroxymethylbenzoato)-O,O',O'',O''')-(mu!2$-4,4'-bipyridine-N,N')-di-zinc]		colorless	C2	5	needle	11.42	153	0.738	0.741	Both rings of the 4,4'-bipyridine ligand are disordered about the bonding axis, and as such 4 carbon atoms from each ring are modelled over two sites with occupancies 0.687:0.313 and 0.555:0.445 respectively. The authors state all the disorder could not be satisfactorily modelled.		The SQUEEZE/PLATON procedure was used to establish a void space of 4911.9A$3! (we calculate a void space of 38%). The SQUEEZE calculations shown in the deposited cif give a count of effectively no electrons, suggesting the sample analysed had been desolvated. The paper suggests dimethylformamide solvent molecules were present in the structure when synthesised	TEMP: at 153 K COLOR: colorless "HABIT: needle
AGAYEM	M.Eddaoudi, Jaheon Kim, D.Vodak, A.Sudik, J.Wachter, M.O'Keeffe, O.M.Yaghi	Proc.Nat.Acad.Sci.USA	2002	(C9 H9 Cu1 N1 O5 S1)n,2n(C3 H7 N1 O1)	catena-((mu!4$-Thiophene-2,5-dicarboxylato)-(dimethylformamide)-copper(ii) bis(dimethylformamide) clathrate)		green	R-3m	166	polyhedron	7.78	153	0.937	0.937	The dimethylformamide ligand is disordered by symmetry. Solvent molecules (represented by atoms C2G-C8G) are also disordered.			TEMP: at 153 K COLOR: green "HABIT: polyhedron
AGERUB	Mei Liu, Shangchao Du, Wuping Liao	J.Mol.Struct.	2013	(C80 H68 Cl1 Co4 O12 S4)n	catena-[(mu!4$-p-t-Butylthiacalix[4]arene)-bis(mu!4$-1,1':3',1''-terphenyl-4,4''-dicarboxylato)-(mu!4$-chloro)-tetra-cobalt unknown solvate]		violet	P21/m	11	block	8.65	188	0.993	0.993	C19B and C19A disordered over two sites with occupancies 0.567:0.433; Disordered solvent molecules were not modelled and the disordered density was taken into account using the SQUEEZE/PLATON procedure.			TEMP: at 188 K COLOR: violet "HABIT: block
AGOFEJ	W.M.Bloch, C.J.Doonan, C.J.Sumby	CrystEngComm	2013	(C104 H104 Cu6 N16 O20 2+)n,2n(N1 O3 1-),12n(C3 H7 N1 O1)	catena-[tetrakis(mu!5$-4,4'-(Methylenebis(3,5-dimethyl-1H-pyrazole-1,4-diyl))dibenzoato)-diaqua-bis(ethanol)-di-copper(i)-tetra-copper(ii) dinitrate N,N-dimethylformamide solvate]		blue	P21/c	14	rod	5.73	150	0.89	0.89	Disordered nitrate anion and N,N-dimethylformamide solvent molecules were not modelled and the disordered density was taken into account using the SQUEEZE/PLATON procedure. The unit cell was found to contain a void of 16308 A$3! holding 2109 electrons.	synchrotron		TEMP: 150 K RADIATION: synchrotron
AGOVID	Xiang Zhao, Xianhui Bu, TaoWu, Shou-Tian Zheng, Le Wang, Pingyun Feng	Nat.Commun.	2013	(C114 H72 In6 N6 O26 2+)n,2n(N1 O3 1-)	catena-(tris(mu!4$-Biphenyl-4,4'-dicarboxylato)-hexakis(mu!3$-4-(pyridin-4-yl)benzoato)-bis(mu!3$-oxo)-hexa-indium dinitrate)		colorless	I-43m	217	Cubic	5.51	150	0.672	0.642			The nitrate anions were not modelled crystallographically	TEMP: at 150 K COLOR: colorless "HABIT: Cubic
AGOVUP	Xiang Zhao, Xianhui Bu, TaoWu, Shou-Tian Zheng, Le Wang, Pingyun Feng	Nat.Commun.	2013	(C96 H63 In6 N9 O26 2+)n,2n(N1 O3 1-)	catena-(tris(mu!4$-2-Aminoterephthalato)-bis(mu!3$-oxo)-hexakis(mu!3$-4-(4-pyridyl)benzoato)-hexa-indium dinitrate)		yellow	I-43m	217	Cubic	6.41	150	0.796	0.755	The amino groups of the ligands are disordered over the four available ring positions by symmetry.		The nitrate anions were not modelled crystallographically	TEMP: at 150 K COLOR: yellow "HABIT: Cubic
AGOWAW	Xiang Zhao, Xianhui Bu, TaoWu, Shou-Tian Zheng, Le Wang, Pingyun Feng	Nat.Commun.	2013	(C96 H60 In6 N6 O26 2+)n,2n(N1 O3 1-)	catena-(tris(mu!4$-Terephthalato)-bis(mu!3$-oxo)-hexakis(mu!3$-4-(4-pyridyl)benzoato)-hexa-indium dinitrate)			I23	197		9.25	150	0.785	0.743			The nitrate anions were not modelled crystallographically. Study temperature given as 296 K and 150 K in the CIF	TEMP: at 150 K
AHAPUV	K.L.Mulfort, O.K.Farha, C.D.Malliakas, M.G.Kanatzidis, J.T.Hupp	Chem.-Eur.J.	2010	(C58 H30 N4 O12 Zn2)n,n(C3 H7 N1 O1)	catena-((mu!8$-4,4',4'',4'''-Benzene-1,2,4,5-tetrayltetrabenzoato)-(mu!2$-N,N'-bis(4-pyridyl)-1,4,5,8-naphthalenetetracarboxydi-imide)-di-zinc(ii) dimethylformamide solvate)		yellow	Imma	74	block	6.59	100	0.975	0	One of the pyridyl moieties is disordered by symmetry. An unspecified number of dimethylformamide solvent molecules were taken into account using PLATON/SQUEEZE.			TEMP: at 100 K COLOR: yellow "HABIT: block
AHEQAH	G.Tobin, S.Comby, Nianyong Zhu, R.Clerac, T.Gunnlaugsson, Wolfgang Schmitt	Chem.Commun.	2015	(C33 H19 Ho1 O8)n,n(C3 H7 N1 O1),2n(H2 O1)	catena-[(mu-4,4',4''-(benzene-1,3,5-triyltriethyne-2,1-diyl)tribenzoato)-diaqua-holmium N,N-dimethylformamide unknown solvate dihydrate]	TCM-9-Ho	colorless	Ima2	46	needle	14.69	173	0.923	0.923	C23,C24,C25,N1 disordered by symmetry over two configurations with occupancy 0.5; Disordered solvent molecules were not modelled and the disordered density was taken into account using the SQUEEZE/PLATON procedure.	twin		TEMP: 173 K OTHER-DIFF: twin
AHETAK	Xi Chen, Zhao Li, Rong-jia Wei, Bao Li, Tian-le Zhang, Jun Tao	New J.Chem.	2015	(C48 H33 Co8 N32 O17)n	catena-[octakis(mu-azido)-(mu-hydroxo)-octakis(mu-isonicotinato)-octa-cobalt unknown solvate]		red	I-4m2	119	needle	10.72	293	0.988	0.987	Disordered solvent molecules were not modelled and the disordered density was taken into account using the SQUEEZE/PLATON procedure.	293 K		TEMP: 293 K COLOR: red "HABIT: needle
AHOZII	S.Seth, G.Savitha, J.N.Moorthy	Inorg.Chem.	2015	(C32 H26 Cd1 N12 O8)n	catena-[(mu-2,2',2'',2'''-((2,2',6,6'-tetramethylbiphenyl-3,3',5,5'-tetrayl)tetrakis(1H-1,2,3-triazole-4,1-diyl))tetraacetato)-cadmium]		colorless	Ccc2	37	square	5.7	100	0.952	0.952			We calculate 47.56% void space in the structure	TEMP: 100 K COLOR: colorless "HABIT: square
AJOHUE	Shu-Na Zhao, Xue-Zhi Song, Min Zhu, Xing Meng, Lan-Lan Wu, Jing Feng, Shu-Yan Song, Hong-Jie Zhang	Chem.-Eur.J.	2015	(C24 H12 In1 O20 S4 1-)n,C2 H8 N1 1+,C3 H7 N1 O1	catena-[dimethylammonium bis(mu-4,8-disulfonaphthalene-2,6-dicarboxylato)-indium N,N-dimethylformamide solvate]		colorless	I41/amd	141	block	4.77	293	0.888	0.777	O3,S1 disordered by symmetry over two configurations with occupancy 0.50; The SQUEEZE/PLATON program has been used to model some disorder.	293 K		TEMP: 293 K COLOR: colorless "HABIT: block
AJOQUM	S.Henke, R.Schmid, J.-D.Grunwaldt, R.A.Fischer	Chem.-Eur.J.	2010	(C33 H30 O19 Zn4)n,n(C3 H7 N1 O1)	catena-(tris(mu!4$-2-(2-methoxyethoxy)-1,4-benzenedicarboxylato)-(mu!4$-oxo)-tetra-zinc dimethylformamide solvate)		colorless	Pm-3m	221	cubic	11.3	108	0.846	0	The structure is disordered by symmetry. The SQUEEZE/PLATON program has been used to model the disordered 2-methoxyethoxy chains and the disordered solvent molecules.			TEMP: 108 K COLOR: colorless "HABIT: cubic
ALAMUW	T.K.Prasad, D.H.Hong, M.P.Suh	Chem.-Eur.J.	2010	(C32 H22 Cu2 N4 O14)n,n(C3 H7 N1 O1),n(H2 O1)	catena-((mu!8$-N,N'-bis(3,5-Dicarboxylatophenyl)pyromellitic di-imide)-bis(dimethylformamide)-di-copper dimethylformamide solvate hydrate)	SNU-50	green	R-3m	166	prism	11.28	293	0.881	0	The SQUEEZE/PLATON program was used to model an unspecified number of dimethylformamide and water molecules.	at 293 K		TEMP: at 293 K COLOR: green "HABIT: prism
ALEHUW	Zhanfeng Ju, Shichen Yan, Daqiang Yuan	Chem.Mater.	2016	(C60 H42 N12 O19 Zn4)n	catena-(bis(mu!6$-4-(((3,5-bis(((4-Carboxylatophenyl)carbamoyl)amino)phenyl)carbamoyl)amino)benzoato)-(mu!4$-oxo)-tetra-zinc unknown solvate)	URMOF-3	colorless	Pa-3	205	prism	16.84	293	0.253	0.253	The structure is disordered by symmetry. SQUEEZE/PLATON was used to model some disordered solvent.	293 K		TEMP: 293 K COLOR: colorless "HABIT: prism
ALEJAE	Zhanfeng Ju, Shichen Yan, Daqiang Yuan	Chem.Mater.	2016	(C60 H48 In3 N12 O22)n	catena-(bis(mu!6$-4-(((3,5-bis(((4-Carboxylatophenyl)carbamoyl)amino)phenyl)carbamoyl)amino)benzoato)-(mu!3$-oxo)-triaqua-tri-indium unknown solvate)	URMOF-4	colorless	P3121	152	prism	6.27	293	0.284	0.284	SQUEEZE/PLATON was used to model some disordered solvent.	twin; 293 K		TEMP: 293 K OTHER-DIFF: twin
ALEJEI	Zhanfeng Ju, Shichen Yan, Daqiang Yuan	Chem.Mater.	2016	(C66 H48 Cu6 N12 O36)n	catena-[bis(mu!12$-5,5',5''-(benzene-1,3,5-triyltris(carbamoylimino))triisophthalato)-hexa-aqua-hexa-copper unknown solvate]	URMOF-1	green	I4/m	87	prism	7.64	100	0.636	0.636	SQUEEZE/PLATON was used to model some disordered solvent.			TEMP: 100 K COLOR: green "HABIT: prism
ALEJIM	Zhanfeng Ju, Shichen Yan, Daqiang Yuan	Chem.Mater.	2016	(C66 H48 N12 O36 Zn6)n	catena-[bis(mu!12$-5,5',5''-(benzene-1,3,5-triyltris(carbamoylimino))triisophthalato)-hexa-aqua-hexa-zinc unknown solvate]	URMOF-2	brown	I4/m	87	prism	9.31	100	0.626	0.626	SQUEEZE/PLATON was used to model some disordered solvent.			TEMP: 100 K COLOR: brown "HABIT: prism
ALOLET	Shou-Tian Zheng, Fan Zuo, Tao Wu, B.Irfanoglu, Chengtsung Chou, R.A.Nieto, Pingyun Feng, Xianhui Bu	Angew.Chem.,Int.Ed.	2011	(C2 H8 N1 1+)3n,n(C66 H39 In3 N3 O24 3-)	catena-[tris(Dimethylammonium) tris(mu!2$-5-aminoisophthalato-O,O':O'',O''')-tris(mu!2$-4,4'-biphenyldicarboxylato-O,O':O'',O''')-tri-indium(iii) unknown solvate]	CPM-2-NH!2$		P31c	159		8.52	296	0.957	0.954	In1 and In1A disordered over two sites with occupancies 0.50:0.50; N4 disordered by symmetry over three sites with occupancy 0.33. The paper states the structure contains additional solvent, this has not been modelled from the diffraction data and no further details are given.	at 296 K	We calculate the structure contains 30% void space	TEMP: at 296 K ISO: Isostructural with the 5-hydroxyisophthalate and isophthalate analogues
ALOLOD	Shou-Tian Zheng, Fan Zuo, Tao Wu, B.Irfanoglu, Chengtsung Chou, R.A.Nieto, Pingyun Feng, Xianhui Bu	Angew.Chem.,Int.Ed.	2011	(C2 H8 N1 1+)3n,n(C72 H43 In3 O27 3-)	catena-[tris(Dimethylammonium) tris(mu!2$-5-hydroxyisophthalato-O,O':O'',O''')-tris(mu!2$-4,4'-stilbenedicarboxylato-O,O':O'',O''')-tri-indium(iii) unknown solvate]	CPM-3		P31c	159		9.46	296	0.86	0.855	The paper states the structure contains additional solvent, this has not been modelled from the diffraction data and no further details are given.	at 296 K	We calculate the structure contains 27% void space	TEMP: at 296 K
ALULID	Yinfeng Han, Xiaoyan Li, Liqing Li, Chunlin Ma, Zhen Shen, You Song, Xiaozeng You	Inorg.Chem.	2010	(C84 H60 Ce4 N12 O30)n	catena-[bis(mu!4$-4,4'-Azodibenzoato-O,O,O',O'',O'',O''')-bis(mu!4$-4,4'-azodibenzoato-O,O,O',O'',O''')-bis(mu!4$-4,4'-azodibenzoato-O,O',O'',O''')-hexa-aqua-tetra-cerium(iii) unknown solvate]		red	P-1	2	block	9.97	295	0.976	0.976	It is assumed the framework contains additional disordered solvent, no details are given in the paper or deposited cif.	at 295 K	We calculate the structure contains 32% void space	TEMP: at 295 K COLOR: red "HABIT: block
ANOMOG	J.A.Perman, A.J.Cairns, L.Wojtas, M.Eddaoudi, M.J.Zaworotko	CrystEngComm	2011	(C90 H42 Cu6 N6 O42)n	catena-(tris(mu!8$-5,5'-(1,3,6,8-tetraoxobenzo[lmn][3,8]phenanthroline-2,7-diyl)bis(benzene-1,3-dicarboxylato))-hexaaqua-hexa-copper unknown solvate)		green	C2/m	12	plate	8.19	100	0.75	0.746	The structure is disordered by symmetry. The SQUEEZE/PLATON program has been used to model the solvent molecules.			TEMP: at 100 K COLOR: green "HABIT: plate
ANUGEW	J.K.Schnobrich, O.Lebel, K.A.Cychosz, A.Dailly, A.G.Wong-Foy, A.J.Matzger	J.Am.Chem.Soc.	2010	(C84 H56 Cu6 O30)n	catena-(tetrakis(mu!6$-1,1':3',1''-terphenyl-4,4'',5'-tricarboxylato)-hexaaqua-hexa-copper unknown solvate)	UMCM-151	blue	Immm	71	chunk	13.27	253	0.47	0.467	The SQUEEZE/PLATON program has been used to model the solvent molecules.	twin		TEMP: at 253 K OTHER-DIFF: twin
ANUGIA	J.K.Schnobrich, O.Lebel, K.A.Cychosz, A.Dailly, A.G.Wong-Foy, A.J.Matzger	J.Am.Chem.Soc.	2010	(C28 H18 Cu2 O10)n	catena-((mu!8$-5-(3,5-bis(4-carboxyphenyl)phenyl)benzene-1,3-dicarboxylato)-diaqua-di-copper unknown solvate)	UMCM-152	colorless	R3m	160	prism	5.55	293	0.602	0.598	The SQUEEZE/PLATON program has been used to model the solvent molecules.	at 293 K		TEMP: at 293 K COLOR: colorless "HABIT: prism
ANUGOG	J.K.Schnobrich, O.Lebel, K.A.Cychosz, A.Dailly, A.G.Wong-Foy, A.J.Matzger	J.Am.Chem.Soc.	2010	(C28 H18 Cu2 O10)n	catena-((mu!8$-5-(3,5-bis(4-carboxyphenyl)phenyl)benzene-1,3-dicarboxylato)-diaqua-di-copper unknown solvate)	UMCM-153	blue	Fddd	70	blade	7.68	150	0.619	0.616	The SQUEEZE/PLATON program has been used to model the solvent molecules.			TEMP: at 150 K COLOR: blue "HABIT: blade
ANUGUM	J.K.Schnobrich, O.Lebel, K.A.Cychosz, A.Dailly, A.G.Wong-Foy, A.J.Matzger	J.Am.Chem.Soc.	2010	(C29 H13 O10 Zn2)n	catena-((mu!8$-4-(3,5-bis(3,5-dicarboxyphenyl)phenyl)benzoato)-di-zinc unknown solvate)	UMCM-154	colorless	C2/c	15	prism	7.24	95	0.68	0.68	The SQUEEZE/PLATON program has been used to model the solvent molecules.			TEMP: at 95 K COLOR: colorless "HABIT: prism
APAZIC	Haijun Wang, Fujun Cheng, Changchang Zou, Qianqian Li, Yinying Hua, Jingui Duan, Wanqin Jin	CrystEngComm	2016	(C27 H19 La1 O8)n	catena-[(mu-1,1':4',1'':4'',1'''-quaterphenyl-3,4''',5-tricarboxylato)-diaqua-lanthanum unknown solvate]	NTU-10	colorless	I2/a	15	block	5.21	296	0.95	0.95	Disordered solvent molecules were not modelled and the disordered density was taken into account using the SQUEEZE/PLATON procedure.	296 K		TEMP: 296 K COLOR: colorless "HABIT: block
APEBII	Xiaoping Zhang, Zhenjie Zhang, J.Boissonnault, S.M.Cohen	Chem.Commun.	2016	(C22 H16 Cu2 N2 O12)n	catena-[(mu-5,5'-((3,4-dioxocyclobut-1-ene-1,2-diyl)diazanediyl)di(benzene-1,3-dicarboxylato))-bis(methanol)-di-copper unknown solvate]		green	R-3m	166		6.89	296	0.819	0.819	C10 disordered by symmetry over two configurations with occupancy 0.25; C16,C2,N2 and C12,C3,C4,C6,C8,C9,N1,O5,O7 and O1 disordered over three sites with occupancies 0.5:0.5,0.25,0.25,0.25,0.5,0.25,0.5,0.25,0.25:0.3333; Disordered solvent molecules were not modelled and the disordered density was taken into account using the SQUEEZE/PLATON procedure.	296.1 K		TEMP: 296.1 K COLOR: green
APEBOO	Xiaoping Zhang, Zhenjie Zhang, J.Boissonnault, S.M.Cohen	Chem.Commun.	2016	(C20 H12 N2 O12 Zn2)n	catena-[(mu-5,5'-((3,4-dioxocyclobut-1-ene-1,2-diyl)diazanediyl)di(benzene-1,3-dicarboxylato))-diaqua-di-zinc unknown solvate]		colorless	R-3m	166	polyhedral	7	296	0.765	0.758	C10,C11,C12,C13,O3,O4 disordered over one sites with occupancies 0.25; Disordered solvent molecules were not modelled and the disordered density was taken into account using the SQUEEZE/PLATON procedure.	296.1 K		TEMP: 296.1 K COLOR: colorless "HABIT: polyhedral
AQIXOP	Li-Li Liang, Lei Xu, Hong-Bao Xue, Zhao-Lin Tao, Fei-Jian Chen	J.Mol.Struct.	2016	(C39 H41 Ce1 N2 O11)n	catena-((mu-4,4',4''-((2,4,6-trimethylbenzene-1,3,5-triyl)tris(methyleneoxy))tribenzoato)-bis(dimethylformamide)-cerium unknown solvate)		colorless	P-1	2	block	5.56	296	0.988	0.988	C34',C35',C36',C37',C38',C39',N1',N2',O10',O11' and C34,C35,C36,C37,C38,C39,N1,N2,O10,O11 disordered over two sites with occupancies 0.736:0.264. The SQUEEZE/PLATON program has been used to model some disorder.	296 K		TEMP: 296 K COLOR: colorless "HABIT: block
ARAXEX	Biao Liu, Yong-Cai Qiu, Guo Peng, Li Ma, Li-Ming Jin, Jin-Biao Cai, Hong Deng	Inorg.Chem.Commun.	2009	(C48 H46 Cd4 Cl2 N24 O2)n	catena-(hexakis(mu!3$-5-Benzyltetrazolato)-bis(mu!2$-chloro)-diaqua-tetra-cadmium(ii))		colorless	P41	76	block	5.5	296	0.909	0		at 296 K	The atoms labelled as N25 and N26 appear to be water molecules and have been re-labelled accordingly	TEMP: at 296 K COLOR: colorless "HABIT: block
AROFET	Jian Tian, R.K.Motkuri, P.K.Thallapally, B.P.McGrail	Cryst.Growth Des.	2010	(C33 H28 Cd2 O14)n	catena-((mu!8$-tetrakis(4-Methyloxabenzoato)methane)-diaqua-di-cadmium unknown solvate)			P-1	2	rectangular	7.87	100	0.893	0.889	The SQUEEZE/PLATON program has been used to model some unspecified disordered solvent molecules.		Published c-cell dimension differs slightly to that published	TEMP: at 100 K HABIT: rectangular
ATOWIQ	Yun Ling, Zhen-Xia Chen, Zhai Fu-Peng, Ya-Ming Zhou, Lin-Hong Weng, Dong-Yuan Zhao	Chem.Commun.	2011	(C20 H16 N3 O8 Zn2)n,n(C1 H5 N1),2n(H2 O1)	catena-(bis(mu!3$-1,4-benzenedicarboxylato)-(mu!3$-2,5-dimethyl-1H-1,2,4-triazole)-di-zinc methylamine dihydrate clathrate)		colorless	C2/m	12	rod	8.16	293	0.971	0.971	The guest molecules are disordered.	at 293 K		TEMP: at 293 K COLOR: colorless "HABIT: rod
ATOWOW	Yun Ling, Zhen-Xia Chen, Zhai Fu-Peng, Ya-Ming Zhou, Lin-Hong Weng, Dong-Yuan Zhao	Chem.Commun.	2011	(C20 H16 N3 O8 Zn2)n,n(C2 H7 N1),n(H2 O1)	catena-(bis(mu!3$-1,4-benzenedicarboxylato)-(mu!3$-2,5-dimethyl-1H-1,2,4-triazole)-di-zinc dimethylamine monohydrate clathrate)		colorless	C2/m	12	rod	7.31	296	0.963	0.963	The guest molecules are disordered.	at 296 K		TEMP: at 296 K COLOR: colorless "HABIT: rod
AXINAX	P.Wollmann, M.Leistner, U.Stoeck, R.Gruenker, K.Gedrich, N.Klein, O.Throl, W.Grahlert, I.Senkovska, F.Dreisbach, S.Kaskel	Chem.Commun.	2011	(C162 H138 Co11 O60)n	catena-(hexakis(mu!6$-benzene-1,3,5-tris(4-benzoato))-tetracosa-aqua-undeca-cobalt(ii) unknown solvate)	DUT-28(RT)	purple	C2/m	12		8.05	293	0.415	0	The structure is disordered by symmetry. The disordered unknown solvent molecules were not modelled and the disordered density was taken into account using the SQUEEZE/PLATON procedure.	at 293 K	Published unit-cell dimensions differ slightly to those deposited. Deposited cif is correct, published cells originate from former structure refinement	TEMP: at 293 K COLOR: purple "SENS: moisture-sensitive
AXINAX01	P.Wollmann, M.Leistner, U.Stoeck, R.Gruenker, K.Gedrich, N.Klein, O.Throl, W.Grahlert, I.Senkovska, F.Dreisbach, S.Kaskel	Chem.Commun.	2011	(C162 H138 Co11 O60)n	catena-(hexakis(mu!6$-benzene-1,3,5-tris(4-benzoato))-tetracosa-aqua-undeca-cobalt(ii) unknown solvate)	DUT-28(LT)	purple	C2/c	15		7.63	100	0.455	0	The disordered unknown solvent molecules were not modelled and the disordered density was taken into account using the SQUEEZE/PLATON procedure.	synchrotron radiation	Study temperature given as 293 K and 100 K in the CIF Large structure in which program limits have been exceeded. A full set of coordinates are available from the deposited CIF	TEMP: at 100 K RADIATION: synchrotron radiation
AXINIF	P.Wollmann, M.Leistner, U.Stoeck, R.Gruenker, K.Gedrich, N.Klein, O.Throl, W.Grahlert, I.Senkovska, F.Dreisbach, S.Kaskel	Chem.Commun.	2011	(C54 H34 Co3 O14)n	catena-(bis(mu!5$-benzene-1,3,5-tris(4-benzoato))-(mu!3$-aqua)-aqua-tri-cobalt(ii) unknown solvate)		violet	Pnma	62	block	7.58	293	0.765	0	The disordered unknown solvent molecules were not modelled and the disordered density was taken into account using the SQUEEZE/PLATON procedure.	at 293 K	Published unit-cell dimensions differ slightly to those deposited. Deposited cif is correct, published cells originate from former structure refinement	TEMP: at 293 K COLOR: violet "HABIT: block
AXUHAD	Kihwan Kim, Sunhong Park, Ki-Min Park, Shim Sung Lee	Cryst.Growth Des.	2011	(C68 H76 Co2 N4 O16 S4)n	catena-((mu!4$-5,11,17,23-tetra-t-butyl-25,26,27,28-tetrakis(carboxylatomethoxy)-2,8,14,20-tetrathiacalix(4)arene)-bis(mu!2$-4,4'-bipyridine)-tetraaqua-di-cobalt)		orange	I41/acd	142	block	4.65	173	0.834	0.834	C10,C11,C12 and C10',C11',C12' disordered over two sites with occupancies 0.50:0.50.			TEMP: at 173 K COLOR: orange "HABIT: block
BAZFUF	H.Furukawa, Yong Bok Go, Nakeun Ko, Young Kwan Park, F.J.Uribe-Romo, Jaheon Kim, M.O'Keeffe, O.M.Yaghi	Inorg.Chem.	2011	(C108 H72 Cu6 O30)n	catena-(tetrakis(mu!6$-1,3,5-tris(4-carboxylatophenyl)benzene)-hexa-aqua-hexa-copper unknown solvate)		blue	Pm-3n	223	block	6.23	258	0.357	0.357	The disordered unknown solvent molecules were not modelled and the disordered density was taken into account using the SQUEEZE/PLATON procedure.			TEMP: at 258 K COLOR: blue "HABIT: block
BAZFUF01	N.Klein, I.Senkovska, I.A.Baburin, R.Grunker, U.Stoeck, M.Schlichtenmayer, B.Streppel, U.Mueller, S.Leoni, M.Hirscher, S.Kaskel	Chem.-Eur.J.	2011	(C108 H72 Cu6 O30)n	catena-(tetrakis(mu!6$-benzene-1,3,5-tribenzoato)-hexaaqua-hexa-copper)		blue	Pm-3n	223	block	7.99	293	0.359	0.359	The SQUEEZE/PLATON program has been used to model disordered guest solvent molecules.	synchrotron radiation; at 293 K		TEMP: at 293 K RADIATION: synchrotron radiation
BAZGAM	H.Furukawa, Yong Bok Go, Nakeun Ko, Young Kwan Park, F.J.Uribe-Romo, Jaheon Kim, M.O'Keeffe, O.M.Yaghi	Inorg.Chem.	2011	(C180 H120 Cu6 O30)n	catena-(tetrakis(mu!6$-1,3,5-tris(4'-carboxylato-1,1'-biphenyl-4-yl)benzene)-hexa-aqua-hexa-copper unknown solvate)		blue	Fm-3m	225	block	15.25	258	0.131	0.131	The disordered unknown solvent molecules were not modelled and the disordered density was taken into account using the SQUEEZE/PLATON procedure.			TEMP: at 258 K COLOR: blue "HABIT: block
BAZGEQ	H.Furukawa, Yong Bok Go, Nakeun Ko, Young Kwan Park, F.J.Uribe-Romo, Jaheon Kim, M.O'Keeffe, O.M.Yaghi	Inorg.Chem.	2011	(C168 H108 Cu6 N12 O30)n	catena-(tetrakis(mu!6$-4',4'',4'''-(1,3,5-triazine-2,4,6-triyl)tribiphenyl-4-carboxylato)-hexa-aqua-hexa-copper unknown solvate)		blue	P42/nmc	137	block	5.92	296	0.347	0.347	The disordered unknown solvent molecules were not modelled and the disordered density was taken into account using the SQUEEZE/PLATON procedure.	at 296 K		TEMP: at 296 K COLOR: blue "HABIT: block
BEDYEQ	Dawei Feng, Zhi-Yuan Gu, Jian-Rong Li, Hai-Long Jiang, Zhangwen Wei, Hong-Cai Zhou	Angew.Chem.,Int.Ed.	2012	(C48 H32 Cl1 Fe1 N4 O16 Zr3)n	catena-[(mu!9$-5,10,15,20-tetrakis(4-Carboxylatophenyl)porphyrinato)-tetrakis(mu!3$-hydroxo)-chloro-tetrahydroxy-iron-tri-zirconium unknown solvate]		purple	P6/mmm	191	blade	5.51	150	0.49	0.487	Disordered solvent molecules were removed using SQUEEZE/PLATON.	synchrotron radiation	The study temperature is given as both 150 K and 173 K	TEMP: at 150 K RADIATION: synchrotron radiation
BEHVUH	P.D.Frischmann, B.J.Sahli, S.Guieu, B.O.Patrick, M.J.MacLachlan	Chem.-Eur.J.	2012	C1176 H1200 N48 O48 Pt24	catena-((mu-2-(((2-oxy-4-(tris(4-t-butylphenyl)methyl)phenyl)imino)methyl)-4-(pyridin-3-yl)phenolato)-platinum)		yellow	P21/c	14	rod	13.34	225	0.911	0.804			Large structure in which program limits have been exceeded. A full set of coordinates are available from the deposited CIF	TEMP: at 225 K COLOR: yellow "HABIT: rod
BELVEV	P.Schmiedel, H.Krautscheid	Z.Anorg.Allg.Chem.	2012	(C44 H27 Mn3 O16 P2 1-)n,n(C2 H8 N1 1+)	catena-(dimethylammonium bis(mu!6$-4,4',4''-phosphoryltribenzoato)-(mu!3$-acetato)-tri-manganese unknown solvate)		colorless	C2/c	15	prism	5.06	180	0.852	0.852	C24,C25,N1 and C24B,C25B,N1B disordered over two sites with occupancies 0.25:0.25; The SQUEEZE/PLATON program has been used to model some disorder.			TEMP: at 180 K COLOR: colorless "HABIT: prism
BEPRIZ	Yong-Sheng Wei, Kai-Jie Chen, Pei-Qin Liao, Bao-Yong Zhu, Rui-Biao Lin, Hao-Long Zhou, Bao-Ying Wang, Wei Xue, Jie-Peng Zhang, Xiao-Ming Chen	Chemical Science	2013	(C57 H34 Co3 N3 O13)n	catena-[tris(mu!5$-4,4'-Pyridine-3,5-diyldibenzoato)-(mu!3$-hydroxo)-tri-cobalt unknown solvate]		purple	R-3c	167	block	4.61	295	0.765	0.765	Disordered solvent molecules were not modelled and the disordered density was taken into account using the SQUEEZE/PLATON procedure.	at 295 K		TEMP: at 295 K COLOR: purple "HABIT: block
BETGOY	Ju-Hsiou Liao, Wan-Ting Chen, Cherng-Shiaw Tsai, Chih-Chieh Wang	CrystEngComm	2013	(Co1 2+)6.06n,n(C72 H24 Cl3 Co12 N96 3-),9.12n(Cl1 1-)	catena-[hexakis(Cobalt) octakis(mu!6$-5,5',5''-benzene-1,3,5-triyltris(tetrazolato))-tris(mu!4$-chloro)-dodeca-cobalt(ii) nonachloride]		pink	Pm-3m	221	chunky	8.73	423	0.977	0.901	The authors state additional ions cannot be well seen by X-ray crystallography.The structure has been modelled with a cobalt ion (occupancy 0.13) and two chloride anions (occupancy 0.25) located near to the sodalite framework.		A formula for the structure is not given in the paper; the modelled atoms in the deposited cif do not result in a charge-balanced formula. The formula given in the database entry has the number of chloride anions reported in the cif, but requires additional cobalt cations to achieve charge balance	TEMP: at 423 K COLOR: pink "HABIT: chunky
BETHEP	Ju-Hsiou Liao, Wan-Ting Chen, Cherng-Shiaw Tsai, Chih-Chieh Wang	CrystEngComm	2013	(Cd1 2+)3.12n,n(C72 H24 Cd12 Cl3 N96 3-),3.24n(Cl1 1-)	catena-[tris(Cadmium) octakis(mu!6$-5,5',5''-benzene-1,3,5-triyltris(tetrazolato))-tris(mu!4$-chloro)-dodeca-cadmium(ii) trichloride]		colorless	Pm-3m	221	chunky	5.58	423	0.96	0.929	The authors state additional ions cannot be well seen by X-ray crystallography.The structure has been modelled with a cadmium cation (occupancy 0.08) and chloride anion (occupancy 0.25) located near to the sodalite framework.		A formula for the structure is not given in the paper; the modelled atoms in the deposited cif do not result in a charge-balanced formula. The formula given in the database entry has the number of chloride anions reported in the cif, but requires additional cadmium cations to achieve charge balance	TEMP: at 423 K COLOR: colorless "HABIT: chunky
BEVWAB	R.Kitaura, G.Onoyama, H.Sakamoto, R.Matsuda, S.Noro, S.Kitagawa	Angew.Chem.,Int.Ed.	2004	(C44 H26 Cu2 N4 O14 Zn3)n,2n(C3 H7 N1 O1)	catena-(bis((mu!5$-N,N'-o-Phenylene-bis(salicylideneimino-5-carboxylato))-(mu!2$-hydroxo))-di-copper(ii)-tri-zinc(ii) bis(dimethylformamide) clathrate)		yellow	C2/m	12	needle	9.96	293	0.957	0.96	The copper atom and phenylenediamine group are equally disordered over two sites related by symmetry; a number of guest dmf molecules are reported as disordered.	at 293.1 K	32% Void space in the structure	TEMP: at 293.1 K COLOR: yellow "HABIT: needle
BEWCUD	J.A.Johnson, Qipu Lin, Lai-Chin Wu, N.Obaidi, Z.L.Olson, T.C.Reeson, Yu-Sheng Chen, Jian Zhang	Chem.Commun.	2013	(C100 H64 N4 O22 Zn5)n,n(C3 H7 N1 O1),6n(H2 O1)	catena-((mu!17$-5,10,15,20-tetrakis(3,5-bis(4-carboxylatophenyl)phenyl)porphyrinato)-hexaaqua-penta-zinc N,N-dimethylformamide solvate hexahydrate)	UNLPF-1	purple	I4/mcm	140	Polyhedron	6.59	100	0.531	0	A Zn atom is disordered. Disordered solvent molecules and water molecules were not modelled and the disordered density was taken into account using the SQUEEZE/PLATON procedure.	synchrotron		TEMP: 100 K RADIATION: synchrotron
BEWSAY	D.Bradshaw, T.J.Prior, E.J.Cussen, J.B.Claridge, M.J.Rosseinsky	J.Am.Chem.Soc.	2004	(C63 H72 N6 Ni3 O18)n	catena-(bis(mu!3$-1,3,5-Benzenetricarboxylato)-hexakis(3-picoline)-tris((R)-1,2-propanediol-O,O')-tri-nickel(ii))		blue	I4132	214	block	7.06	150	0.822	0.822	The cooordinated diol has imposed disorder.	synchrotron radiation; absolute configuration		TEMP: at 150 K RADIATION: synchrotron radiation "ABS-CONFIG: absolute configuration
BEXVEH	R.Patra, H.M.Titi, I.Goldberg	CrystEngComm	2013	(C102 H72 Cu12 O66)n,n(C4 H9 N1 O1),n(H2 O1)	catena-[hexakis(mu!8$-5-(3,5-dicarboxybenzyloxy)isophthalato)-dodecaaqua-dodeca-copper dimethylacetamide solvate hydrate]		blue	P21/n	14	plate	4.39	110	0.871	0.835	The SQUEEZE/PLATON program has been used to model some disorder. One C-O group is disordered by symmetry.		It is unclear from the formula given what the quantities of solvent are	TEMP: at 110 K COLOR: blue "HABIT: plate
BICDAU	P.Schmieder, D.Denysenko, M.Grzywa, B.Baumgartner, I.Senkovska, S.Kaskel, G.Sastre, L.van Wullen, D.Volkmer	Dalton Trans.	2013	(C88 H60 N36 O16 Zn10)n	catena-[hexakis(mu!6$-5,5'-bibenzotriazol-1-ide)-octakis(acetato)-deca-zinc unknown solvate]	Zn-CFA-1	light brown	P321	150	trigonal prism	4.5	100	0.803	0.803	O1A,O2A and O1B,O2B disordered over two sites with occupancies 0.57:0.43; O3,O4 disordered by symmetry over three sites with occupancy 0.33; Disordered solvent molecules were not modelled and the disordered density was taken into account using the SQUEEZE/PLATON procedure.	synchrotron radiation; absolute configuration		TEMP: at 100 K RADIATION: synchrotron radiation "ABS-CONFIG: absolute configuration
BICPUA	Yabing He, H.Furukawa, Chuande Wu, M.O'Keeffe, R.Krishna, Banglin Chen	Chem.Commun.	2013	(C66 H42 O16 Yb3)n	catena-[(mu!12$-1,3,5-tris(4,4''-Dicarboxylato-1,1':3',1''-terphenyl-5'-yl)benzene)-(mu!3$-oxo)-triaqua-ytterbium(iii) unknown solvate]	UTSA-62		P-62c	190		6.33	293	0.548	0.548	Disordered solvent molecules were not modelled and the disordered density was taken into account using the SQUEEZE/PLATON procedure.	293 K		TEMP: 293 K
BIDPOV	Zhaoxu Wang, Baishu Zheng, Heting Liu, Pinggui Yi, Xiaofang Li, Xianyong Yu, Ruirui Yun	Dalton Trans.	2013	(C30 H16 Cu2 O10)n	catena-[(mu!8$-5,5'-(Naphthalene-1,4-diyldiethyne-2,1-diyl)dibenzene-1,3-dicarboxylato)-diaqua-di-copper(ii) unknown solvate]	HNUST-2	green	R-3	148		4.83	296	0.603	0.599	The central napthyl unit of the tetracarboxylate ligand is disordered by symmetry. The SQUEEZE/PLATON program has been used to model some disorder.	at 296 K		TEMP: at 296 K COLOR: green
BIGZUO	A.Schoedel, L.Wojtas, S.P.Kelley, R.D.Rogers, M.Eddaoudi, M.J.Zaworotko	Angew.Chem.,Int.Ed.	2011	(C36 H30 Ag3 Cr3 N6 O16 4+)n,n(H2 O1),4n(N1 O3 1-)	(mu!3$-Oxo)-hexakis(mu!3$-isonicotonato)-triaqua-tri-chromium-tri-silver tetranitrate hydrate]		green	P63/mmc	194	rod	9.69	100	0.389	0.331	The SQUEEZE/PLATON program has been used to model some disorder.		The structure should have 6 isonicotinate ligands	TEMP: 100 K COLOR: green "HABIT: rod
BIHBAX	A.Schoedel, L.Wojtas, S.P.Kelley, R.D.Rogers, M.Eddaoudi, M.J.Zaworotko	Angew.Chem.,Int.Ed.	2011	(C72 H60 Ag6 Cr6 N12 O32 4+)n,3n(N1 O3 1-),n(B1 F4 1-),n(H2 O1)	bis(mu!3$-Oxo)-dodecakis(mu!3$-isonicotonato)-hexaqua-hexa-chromium-hexa-silver trinitrate tetrafluoroborate hydrate]		green	P41212	92	rod	7.77	100	0.374	0.334	The SQUEEZE/PLATON program has been used to model some disorder.		Anions are reported as x(tetrafluoroborate) 4-x(nitrate)	TEMP: 100 K COLOR: green "HABIT: rod
BIHBEB	A.Schoedel, L.Wojtas, S.P.Kelley, R.D.Rogers, M.Eddaoudi, M.J.Zaworotko	Angew.Chem.,Int.Ed.	2011	(C72 H72 Cd3 Cr6 N12 O38 8+)n,8n(N1 O3 1-),n(C3 H7 N1 O1),n(C2 H3 N1)	catena-[bis(mu!3$-Oxo)-dodecakis(mu!3$-isonicotonato)-dodecaqua-tri-cadmium-hexa-chromium octanitrate acetonitrile N,N-dimethylformamide solvate]		green	P6/mmm	191	rod	11.82	100	0.777	0	The structure is disordered; The SQUEEZE/PLATON program has been used to model some disorder.		The exact number of solvent molecules is unknown	TEMP: 100 K COLOR: green "HABIT: rod
BINCUY	Dan Tian, Qiang Chen, Yue Li, Ying-Hui Zhang, Ze Chang, Xian-He Bu	Angew.Chem.,Int.Ed.	2014	(C102 H78 Co3 N12 O18)n	catena-(bis(mu!6$-3,3',3''-((2,4,6-Trimethylbenzene-1,3,5-triyl)tris(methyleneoxy))tribenzoato)-bis(mu!3$-2,4,6-tri(pyridin-4-yl)-1,3,5-triazine)-tri-cobalt unknown guest clathrate)		orange	P-43m	215	tetrahedron	4.7	113	0.584	0.584	Disordered guest molecules were not modelled and the disordered density was taken into account using the SQUEEZE/PLATON procedure.			TEMP: at 113.2 K COLOR: orange "HABIT: tetrahedron "SOURCE-CHEM: N,N-dimethylformamide/ethanol "ISO: Isostructural with the Ni analogue
BINDAF	Dan Tian, Qiang Chen, Yue Li, Ying-Hui Zhang, Ze Chang, Xian-He Bu	Angew.Chem.,Int.Ed.	2014	(C102 H78 N12 Ni3 O18)n	catena-(bis(mu!6$-3,3',3''-((2,4,6-Trimethylbenzene-1,3,5-triyl)tris(methyleneoxy))tribenzoato)-bis(mu!3$-2,4,6-tri(pyridin-4-yl)-1,3,5-triazine)-tri-nickel unknown guest clathrate)		green	P-43m	215	tetrahedron	5.58	113	0.601	0.601	Disordered guest molecules were not modelled and the disordered density was taken into account using the SQUEEZE/PLATON procedure.			TEMP: at 113 K COLOR: green "HABIT: tetrahedron "SOURCE-CHEM: N,N-dimethylformamide/ethanol "ISO: Isostructural with the Co analogue
BINRUN	Yabing He, Zhiyong Guo, Shengchang Xiang, Zhangjing Zhang, Wei Zhou, F.R.Fronczek, S.Parkin, S.T.Hyde, M.OKeeffe, Banglin Chen	Inorg.Chem.	2013	(C78 H48 O15 Zn3)n,16n(C3 H7 N1 O1)	catena-[bis(mu!6$-6,6',6''-benzene-1,3,5-triyltrinaphthalene-2-carboxylato)-triaqua-tri-zinc N,N-dimethylformamide solvate]	UTSA-28-Zn		Pn-3n	222		6.54	90	0.97	0	Disordered N,N-dimethylformamide solvent molecules were not modelled and the disordered density was taken into account using the SQUEEZE/PLATON procedure.			TEMP: at 90 K ISO: Isostructural with the Cu and Mn analogues
BINSAU	Yabing He, Zhiyong Guo, Shengchang Xiang, Zhangjing Zhang, Wei Zhou, F.R.Fronczek, S.Parkin, S.T.Hyde, M.OKeeffe, Banglin Chen	Inorg.Chem.	2013	(C78 H48 Mn3 O15)n	catena-[bis(mu!6$-6,6',6''-benzene-1,3,5-triyltri(2-naphthoato))-triaqua-tri-manganese unknown solvate]		colorless	Pn-3n	222	Block	7.04	243	0.491	0.488	The SQUEEZE/PLATON program has been used to model some disorder.			TEMP: at 243 K COLOR: colorless "HABIT: Block
BIPBAF	Zhiqiang Liang, Jingjing Du, Libo Sun, Jin Xu, Ying Mu, Yi Li, Jihong Yu, Ruren Xu	Inorg.Chem.	2013	(C102 H72 Cu12 O66)n	catena-(hexakis(mu!8$-5-(3,5-Dicarboxylatobenzyloxy)isophthalato)-dodeca-aqua-dodeca-copper unknown solvate)		green	P21/c	14	block	8.84	293	0.825	0.825	The structure is disordered by symmetry. The SQUEEZE/PLATON program has been used to model some disordered solvent.	at 293 K		TEMP: at 293 K COLOR: green "HABIT: block
BIPKUI	P.Kanoo, R.Matsuda, H.Sato, Liangchun Li, Hyung Joon Jeon, S.Kitagawa	Inorg.Chem.	2013	(C86 H72 Cu4 N10 O22 4+)n,4n(N1 O3 1-),n(H2 O1)	catena-(bis(mu!3$-5-(4-(4-Pyridyl)pyridylmethyl)isophthalato-N,O,O')-bis(mu!3$-5-(4-(4-pyridyl)pyridylmethyl)isophthalato-N,O,O',O'')-(mu!2$-4,4'-bipyridine)-hexa-aqua-tetrra-copper tetranitrate hydrate)		blue	P21/n	14	block	12.47	100	0.737	0.726	The SQUEEZE/PLATON program has been used to model some disorder.			TEMP: at 100 K COLOR: blue "HABIT: block
BIPSUQ	Wen-Yang Gao, L.Wojtas, Shengqian Ma	Chem.Commun.	2014	(C80 H52 Cu7 N4 O30)n	catena-[(mu-5,10,15,20-tetrakis(3,5-dicarboxybiphenyl)porphyrinato)-tetrakis(mu-formato)-hexa-aqua-hepta-copper unknown solvate]	MMPF-9	colorless	P63/mmc	194	block	4.85	228	0.463	0.46	Disordered solvent molecules were not modelled and the disordered density was taken into account using the SQUEEZE/PLATON procedure.			TEMP: at 228 K COLOR: colorless "HABIT: block
BIWSOQ	M.Dinca, A.Dailly, C.Tsay, J.R.Long	Inorg.Chem.	2008	(Cu1 2+)21n,6n(Cl1 Cu1 1+),16n(C24 H12 N15 3-),30n(H2 O1)	catena-(hexadecakis(mu!12$-2,4,6-tris-4-(Tetrazol-5-yl)phenyl-s-triazine)-hexakis(mu!4$-chloro)-heptacosa-copper hydrate)		green	Im-3m	229	block	15.29	79	0.761	0.761	Phenyl and triazolyl groups are disordered over two sites with occupancies 0.61:0.39.		The water molecules have not been modelled. Large structure beyond our program limits, so only partial diagram input	TEMP: at 79 K COLOR: green "HABIT: block
BOBBUQ	M.Dinca, A.Dailly, C.Tsay, J.R.Long	Inorg.Chem.	2008	(Mn1 2+)21n,6n(Cl1 Mn1 1+),16n(C24 H12 N15 3-),24n(C3 H7 N1 O1)	catena-(hexadecakis(mu!12$-2,4,6-tris-4-(Tetrazol-5-yl)phenyl-s-triazine)-hexakis(mu!4$-chloro)-tetracosakis(dimethylformamide)-heptacosa-manganese)		colorless	Im-3m	229	block	6.25	159	0.782	0.782	The dimethylformamide ligands are disordered by symmetry.		Large structure beyond our program limits, so only partial diagram input	TEMP: at 159 K COLOR: colorless "HABIT: block
BODPAN	A.Ahmed, N.Hodgson, M.Barrow, R.Clowes, C.M.Robertson, A.Steiner, P.McKeown, D.Bradshaw, P.Myers, Haifei Zhang	J.Mater.Chem.A	2014	(C72 H48 Cu12 O60)n	catena-(octakis(mu-benzene-1,3,5-tricarboxylato)-dodecaaqua-dodeca-copper unknown solvate)	HKUST-1	dark turquiose	Fm-3c	226	octahedron	10.48	100	0.967	0	High residual electron density peaks were refined as partially occupied Cu sites (CuT), others (CT) were assigned scattering factor of carbon.			TEMP: 100 K COLOR: dark turquiose "HABIT: octahedron
BOHWUS	H.Furukawa, F.Gandara, Yue-Biao Zhang, Juncong Jiang, W.L.Queen, M.R.Hudson ?, O.M.Yaghi	J.Am.Chem.Soc.	2014	(C12 H8 O16 Zr3)n,6.18(H2 O1)	catena-((mu-benzene-1,3,5-tricarboxylato)-bis(mu-oxo)-bis(mu-hydroxo)-tris(mu-formato)-tri-zirconium hydrate)	MOF-808	colorless	Fd-3m	227	octahedral	3.96	100	0.977	0	The structure is disordered.	synchrotron radiation	Structure contains a large percentage of void space	TEMP: 100.2 K RADIATION: synchrotron radiation
BOHXAZ	H.Furukawa, F.Gandara, Yue-Biao Zhang, Juncong Jiang, W.L.Queen, M.R.Hudson ?, O.M.Yaghi	J.Am.Chem.Soc.	2014	(C42 H26 O22 Zr3)n,2.75(H2 O1)	catena-(tris(mu-3,3'-dihydroxybiphenyl-4,4'-dicarboxylato)-bis(mu-hydroxo)-bis(mu-oxo)-tri-zirconium hydrate)	MOF-806	colorless	Fm-3	202	prism	6.31	100	0.827	0.814	The structure is disordered.		Structure contains a large percentage of void space	TEMP: 100.2 K COLOR: colorless "HABIT: prism
BOQQAB	S.Barman, Anupam Khutia, R.Koitz, O.Blacque, H.Furukawa, M.Iannuzzi, O.M.Yaghi, C.Janiak, J.Hutter, H.Berke	J.Mater.Chem.A	2014	(C36 H18 O13 Zn4)n,0.5(C5 H9 N1 O1),0.5(C3 H7 N1 O1),1.625(H2 O1)	catena-[tris(mu-2,6-azulenedicarboxylato)-(mu-oxo)-tetra-zinc 1-methyl-2-pyrrolidone N,N-dimethylformamide solvate hydrate]	MOF-650	violet	Fm-3m	225	parallelepiped	14.43	183	0.482	0.482	The structure is disordered. The SQUEEZE/PLATON program may have been used.			TEMP: 183 K COLOR: violet "HABIT: parallelepiped
BORYOY	D.E.Williams, J.A.Rietman, J.M.Maier, Rui Tan, A.B.Greytak, M.D.Smith, J.A.Krause, N.B.Shustova	J.Am.Chem.Soc.	2014	(C48 H24 N4 O8 Zn3)n,0.85n(C25 H22 N2 S2),6.3n(C5 H11 N1 O1),7.25n(H2 O1)	catena-((mu!9$-5,10,15,20-tetrakis(4-Carboxylatophenyl)porphyrinato)-tri-zinc bis(5-pyridyl-2-methyl-3-thienyl)cyclopentene N,N-diethylformamide solvate hydrate)		red	P4/nmm	129	square plates	5.36	150	0.836	0	Disordered solvent molecules were not modelled and the disordered density was taken into account using the SQUEEZE/PLATON procedure. The unit cell was found to contain a void of 6773 A$3! holding 1035 electrons.	synchrotron	Due to disorder and the fact that the several parts of the structure were treated with SQUEEZE, we have not represented the binding of the terminal ligands to the zinc atoms	TEMP: 150 K RADIATION: synchrotron
BOSZEQ	M.Carboni, Zekai Lin, C.W.Abney, Teng Zhang, Wenbin Lin	Chem.-Eur.J.	2014	(C48 H42 N2 O22 Zr3)n	catena-[bis(mu!4$-2'-((3-carboxypropanoyl)amino)-1,1':4',1''-terphenyl-4,4''-dicarboxylato)-tetrakis(mu!3$-oxido)-tetraaqua-tri-zirconium]			I4/mmm	139		8.34	296	0.529	0.43	The structure is disordered.	at 296 K	We calculate 81.84% void space in the structure. Not all atoms have been modelled	TEMP: at 296 K
BOSZOA	M.Carboni, Zekai Lin, C.W.Abney, Teng Zhang, Wenbin Lin	Chem.-Eur.J.	2014	(C72 H44 N3 O25 Zr3)n	catena-[tris(mu!4$-2'-((3-carboxyprop-2-enoyl)amino)-1,1':4',1''-terphenyl-4,4''-dicarboxylato)-bis(mu!3$-hydroxy)-bis(mu!3$-oxido)-tri-zirconium]			Fm-3m	225		12.72	296	0.628	0.465	C13 disordered by symmetry over four configurations with occupancy 0.25.	at 296 K	We calculate 73.29% void space in the structure. Not all atoms have been modelled	TEMP: at 296 K
BOWNUY	Ling-Juan Zhang, Cai-Yun Han, Qin-Qin Dang, Yan-Hong Wang, Xian-Ming Zhang	RSC Advances	2015	(C72 H48 Cu12 N96 O15)n	catena-[octakis(1,3,6-tris(tetrazolato)-benzene)-tris(mu-oxo)-dodeca-aqua-dodeca-copper unknown solvate]			Pm-3m	221	octahedral	7.05	293	0.838	0.843	The structure is disordered. The authors' sum of formula is C24 H16 Cl0.31 Cu4 N32 O4.69The SQUEEZE/PLATON program has been used to model some disorder.	at 293 K		TEMP: at 293 K HABIT: octahedral
BOXFAW	S.Das, Hyunuk Kim, K.Kim	J.Am.Chem.Soc.	2009	(Cd1 2+)1.5n,3n(H3 O1 1+),n(C348 H360 Cd12 O63 6-),6n(H2 O1)	catena-(Sesqui-cadmium(ii) tris(oxonium) octakis(mu!6$-5,5,10,10,15,15-hexaethyl-10,15-dihydro-5H-diindeno[1,2-a:1',2'-c]fluorene-2,7,12-tricarboxylato)-tris(mu!4$-oxo)-dodecakis(methanol)-dodeca-cadmium(ii) hexahydrate)	catena-(Sesqui-cadmium(ii) tris(oxonium) octakis(mu!6$-5,5,10,10,15,15-hexaethyltruxene-2,7,12-tricarboxylato)-tris(mu!4$-oxo)-dodecakis(methanol)-dodeca-cadmium(ii) hexahydrate)	colorless	Fm-3c	226	block	3.69	90	0.841	0		synchrotron radiation	Large structure in which program limits have been exceeded. A partial diagram showing the coordination of the ligands and the coordination of the Cd atoms has been input; The Cd atoms appear to be coordinated to methanol molecules and not water molecules as stated in the paper; The charge balancing Cd cations and oxonium cations could not be located; The total number of uncoordinated water molecu…	TEMP: at 90 K RADIATION: synchrotron radiation
BOXFEA	S.Das, Hyunuk Kim, K.Kim	J.Am.Chem.Soc.	2009	(Pb1 2+)n,4n(H3 O1 1+),n(C336 H336 O63 Pb12 6-),6n(H2 O1)	catena-(Lead(ii) tetrakis(oxonium) octakis(mu!6$-5,5,10,10,15,15-hexaethyl-10,15-dihydro-5H-diindeno[1,2-a:1',2'-c]fluorene-2,7,12-tricarboxylato)-tris(mu!4$-oxo)-dodecaaqua-dodeca-lead(ii) hexahydrate)	catena-(Lead(ii) tetrakis(oxonium) octakis(mu!6$-5,5,10,10,15,15-hexaethyltruxene-2,7,12-tricarboxylato)-tris(mu!4$-oxo)-dodecaaqua-dodeca-lead(ii) hexahydrate)	colorless	Fm-3c	226	block	6.12	90	0.941	0	An uncoordinated water molecule is disordered by symmetry.	synchrotron radiation	Large structure in which program limits have been exceeded. A partial diagram showing the coordination of the ligands and the coordination of the Pb atoms has been input; The charge balancing Pb cations and oxonium cations could not be located; The total number of uncoordinated water molecules is unclear	TEMP: at 90 K RADIATION: synchrotron radiation
BOXFIE	S.Das, Hyunuk Kim, K.Kim	J.Am.Chem.Soc.	2009	(Pb1 2+)1.5n,3n(H3 O1 1+),n(C336 H312 O51 Pb12 6-),6n(H2 O1)	catena-(Sesqui-lead(ii) tris(oxonium) octakis(mu!6$-5,5,10,10,15,15-hexaethyl-10,15-dihydro-5H-diindeno[1,2-a:1',2'-c]fluorene-2,7,12-tricarboxylato)-tris(mu!4$-oxo)-dodeca-lead(ii) hexahydrate)	catena-(Sesqui-lead(ii) tris(oxonium) octakis(mu!6$-5,5,10,10,15,15-hexaethyltruxene-2,7,12-tricarboxylato)-tris(mu!4$-oxo)-dodeca-lead(ii) hexahydrate)	colorless	Fm-3c	226	block	6.69	298	0.93	0		synchrotron radiation; at 298 K	Large structure in which program limits have been exceeded. A partial diagram showing the coordination of the ligands and the coordination of the Pb atoms has been input; The Pb atoms do not appear to be coordinated to water molecules as stated in the paper; The charge balancing Pb cations and oxonium cations and the water molecules could not be located and the exact identity and number of these …	TEMP: at 298 K RADIATION: synchrotron radiation "OTHER-EXP: crystal soaked in Pb(NO3)2 solution for 12 hours
BOXFOK	S.Das, Hyunuk Kim, K.Kim	J.Am.Chem.Soc.	2009	(C348 H363 Dy12 O63 9+)n,9n(N1 O3 1-),n(C1 H4 O1),n(H2 O1)	catena-(octakis(mu!6$-5,5,10,10,15,15-Hexaethyl-10,15-dihydro-5H-diindeno[1,2-a:1',2'-c]fluorene-2,7,12-tricarboxylato)-tris(mu!4$-hydroxo)-dodecakis(methanol)-dodeca-dysprosium(iii) nonanitrate methanol solvate monohydrate)	catena-(octakis(mu!6$-5,5,10,10,15,15-Hexaethyltruxene-2,7,12-tricarboxylato)-tris(mu!4$-hydroxo)-dodecakis(methanol)-dodeca-dysprosium(iii) nonanitrate methanol solvate monohydrate)	colorless	Fm-3c	226	block	8.39	90	0.901	0	The coordinated methanol molecule is disordered equally over two sites. The Dy atom is disordered equally over two sites. One Dy site is coordinated to the central OH group and one Dy site is not coordinated to the central OH group. A combination of these two sites gives the OH group as coordinated to two Dy atoms. The 2D diagram has been represented with the OH coordinated to the four Dy atoms.	synchrotron radiation	Large structure in which program limits have been exceeded. A partial diagram showing the coordination of the ligands and the coordination of the Dy atoms has been input; The charge balancing nitrate anions and the methanol solvent molecules could not be located; The total number of water molecules and methanol solvent molecules is unclear	TEMP: at 90 K RADIATION: synchrotron radiation
BOXVIV	Min Chen, Hui Zhao, Chun-Sen Liu, Xi Wang, Heng-Zhen Shi, Miao Du	Chem.Commun.	2015	(C54 H34 Co3 O20)n	catena-[bis(mu-4,4',4''-(benzene-1,3,5-triyltris(oxy))tribenzoato)-diaqua-tri-cobalt unknown solvate]		purple	R-3c	167	Prism	8.16	294	0.93	0.93	The structure is disordered.The SQUEEZE/PLATON program has been used to model some disorder.	at 294 K		TEMP: at 294 K COLOR: purple "HABIT: Prism
BOXVIV01	Min Chen, Hui Zhao, Chun-Sen Liu, Xi Wang, Heng-Zhen Shi, Miao Du	Chem.Commun.	2015	(C54 H34 Co3 O20)n	catena-[bis(mu-4,4',4''-(benzene-1,3,5-triyltris(oxy))tribenzoato)-diaqua-tri-cobalt unknown solvate]		purple	R-3c	167	Prism	6.39	195	0.949	0.949	The structure is disordered. The SQUEEZE/PLATON program has been used to model some disorder.			TEMP: at 195 K COLOR: purple "HABIT: Prism
BOXWAO	Min Chen, Hui Zhao, Chun-Sen Liu, Xi Wang, Heng-Zhen Shi, Miao Du	Chem.Commun.	2015	(C54 H34 Co3 O20)n	catena-[bis(4,4',4''-(benzene-1,3,5-triyltris(oxy))tribenzoato)-dihydrate-tri-cobalt(ii) unknown solvate]		purple	R-3c	167	Prism	6.26	120	0.96	0.96	The structure is disordered. The SQUEEZE/PLATON program has been used to model some disorder.			TEMP: at 120 K COLOR: purple "HABIT: Prism
BUBMES	Hang Cong, Li-Li Liang, Chuan-Zeng Wang, Yun-Qian Zhang, Zhu Tao, Sai-Feng Xue, Qian-Jiang Zhu, Zhen-Qin Zhang	Wuji Huaxue Xuebao(Chin.)(Chin.J.Inorg.Chem.)	2014	(C30 H38 Ca2 N21 O17 3+)n,Cd1 Cl4 2-,5(H2 O1),Cl1 1-	catena-[bis(mu-cucurbitl(5)uril)-(mu-cucurbitl(5)uril)-diaqua-(mu-nitrato)-di-calcium tetrachloro-cadmium chloride pentahydrate unknown solvate]		colorless	C2/c	15	prism	6.65	223	0.951	1.901	Cd2,Cl4,Cl5,Cl6,Cl7 disordered by symmetry over two configurations with occupancy 0.50; The SQUEEZE/PLATON program has been used to model some disorder.			TEMP: at 223 K COLOR: colorless "HABIT: prism
BUFNEW	S.Das, Hyunuk Kim, K.Kim	J.Am.Chem.Soc.	2009	(Cd1 2+)2n,2n(H3 O1 1+),n(C348 H360 Cd12 O63 6-),4n(H2 O1)	catena-(Di-cadmium(ii) bis(oxonium) octakis(mu!6$-5,5,10,10,15,15-hexaethyl-10,15-dihydro-5H-diindeno[1,2-a:1',2'-c]fluorene-2,7,12-tricarboxylato)-tris(mu!4$-oxo)-dodecakis(methanol)-dodeca-cadmium(ii) tetrahydrate)	catena-(Di-cadmium(ii) bis(oxonium) octakis(mu!6$-5,5,10,10,15,15-hexaethyltruxene-2,7,12-tricarboxylato)-tris(mu!4$-oxo)-dodecakis(methanol)-dodeca-cadmium(ii) tetrahydrate)	colorless	Fm-3c	226	block	6.74	90	0.852	0	A number of water molecules are disordered by symmetry.	synchrotron radiation	Large structure in which program limits have been exceeded. A partial diagram showing the coordination of the ligands and the coordination of the Cd atoms has been input; The Cd atoms appear to be coordinated to methanol molecules and not water molecules as stated in the paper; The charge balancing Cd cations and oxonium cations could not be located; The total number of uncoordinated water molecu…	TEMP: at 90 K RADIATION: synchrotron radiation
BUFNIA	S.Das, Hyunuk Kim, K.Kim	J.Am.Chem.Soc.	2009	(Pb1 2+)2n,2n(H3 O1 1+),n(C336 H336 O63 Pb12 6-),4n(H2 O1)	catena-(Di-lead(ii) bis(oxonium) octakis(mu!6$-5,5,10,10,15,15-hexaethyl-10,15-dihydro-5H-diindeno[1,2-a:1',2'-c]fluorene-2,7,12-tricarboxylato)-tris(mu!4$-oxo)-dodecaaqua-dodeca-lead(ii) tetrahydrate)	catena-(Di-lead(ii) bis(oxonium) octakis(mu!6$-5,5,10,10,15,15-hexaethyltruxene-2,7,12-tricarboxylato)-tris(mu!4$-oxo)-dodecaaqua-dodeca-lead(ii) tetrahydrate)	colorless	Fm-3c	226	block	8.71	90	0.975	0	A number of uncoordinated water molecules are disordered.	synchrotron radiation	Large structure in which program limits have been exceeded. A partial diagram showing the coordination of the ligands and the coordination of the Pb atoms has been input; The charge balancing Pb cations and oxonium cations could not be located; The total number of uncoordinated water molecules is unclear	TEMP: at 90 K RADIATION: synchrotron radiation
BUFNOG	S.Das, Hyunuk Kim, K.Kim	J.Am.Chem.Soc.	2009	(Cd1 2+)1.5n,3n(H3 O1 1+),n(C336 H336 Cd12 O63 6-),6n(H2 O1)	catena-(Sesqui-cadmium(ii) tris(oxonium) octakis(mu!6$-5,5,10,10,15,15-hexaethyl-10,15-dihydro-5H-diindeno[1,2-a:1',2'-c]fluorene-2,7,12-tricarboxylato)-tris(mu!4$-oxo)-dodecaaqua-dodeca-cadmium(ii) hexahydrate)	catena-(Sesqui-cadmium(ii) tris(oxonium) octakis(mu!6$-5,5,10,10,15,15-hexaethyltruxene-2,7,12-tricarboxylato)-tris(mu!4$-oxo)-dodecaaqua-dodeca-cadmium(ii) hexahydrate)	colorless	Fm-3c	226	block	4.34	90	0.826	0		synchrotron radiation	Large structure in which program limits have been exceeded. A partial diagram showing the coordination of the ligands and the coordination of the Cd atoms has been input; The charge balancing Cd cations and oxonium cations could not be located; The total number of uncoordinated water molecules is unclear	TEMP: at 90 K RADIATION: synchrotron radiation
BUFNUM	S.Das, Hyunuk Kim, K.Kim	J.Am.Chem.Soc.	2009	(Cd1 2+)1.5n,3n(H3 O1 1+),n(C336 H312 Cd12 O51 6-),6n(H2 O1)	catena-(Sesqui-cadmium(ii) tris(oxonium) octakis(mu!6$-5,5,10,10,15,15-hexaethyl-10,15-dihydro-5H-diindeno[1,2-a:1',2'-c]fluorene-2,7,12-tricarboxylato)-tris(mu!4$-oxo)-dodeca-cadmium(ii) hexahydrate)	catena-(Sesqui-cadmium(ii) tris(oxonium) octakis(mu!6$-5,5,10,10,15,15-hexaethyltruxene-2,7,12-tricarboxylato)-tris(mu!4$-oxo)-dodeca-cadmium(ii) hexahydrate)		Fm-3c	226		8	90	0.788	0	A number of uncoordinated water molecules are disordered. The Cd atom is partially occupied by a Pb atom with Cd:Pb occupancies 0.76:0.24, respectively. The sum formula is (Cd1 2+)1.5n,3n(H3 O1 1+),n(C336 H312 Cd9.12 O51 Pb2.88 6-),6n(H2 O1).	synchrotron radiation	Large structure in which program limits have been exceeded. A partial diagram showing the coordination of the ligands and the coordination of the Cd atoms has been input; The Cd atoms do not appear to be coordinated to water molecules as stated in the paper; The charge balancing Cd cations and oxonium cations could not be located and the exact identity and number of these cations is unclear; The …	TEMP: at 90 K RADIATION: synchrotron radiation "OTHER-EXP: crystal soaked in Pb(NO3)2 solution for 10 mins
BUFNUM01	S.Das, Hyunuk Kim, K.Kim	J.Am.Chem.Soc.	2009	(Cd1 2+)1.5n,3n(H3 O1 1+),n(C336 H312 Cd12 O51 6-),6n(H2 O1)	catena-(Sesqui-cadmium(ii) tris(oxonium) octakis(mu!6$-5,5,10,10,15,15-hexaethyl-10,15-dihydro-5H-diindeno[1,2-a:1',2'-c]fluorene-2,7,12-tricarboxylato)-tris(mu!4$-oxo)-dodeca-cadmium(ii) hexahydrate)	catena-(Sesqui-cadmium(ii) tris(oxonium) octakis(mu!6$-5,5,10,10,15,15-hexaethyltruxene-2,7,12-tricarboxylato)-tris(mu!4$-oxo)-dodeca-cadmium(ii) hexahydrate)	colorless	Fm-3c	226	block	7.93	90	0.789	0	A number of uncoordinated water molecules are disordered. The Cd atom is partially occupied by a Pb atom with Cd:Pb occupancies 0.66:0.34, respectively. The sum formula is (Cd1 2+)1.5n,3n(H3 O1 1+),n(C336 H312 Cd7.92 O51 Pb4.08 6-),6n(H2 O1).	synchrotron radiation	Large structure in which program limits have been exceeded. A partial diagram showing the coordination of the ligands and the coordination of the Cd atoms has been input; The Cd atoms do not appear to be coordinated to water molecules as stated in the paper; The charge balancing Cd cations and oxonium cations could not be located and the exact identity and number of these cations is unclear; The …	TEMP: at 90 K RADIATION: synchrotron radiation "OTHER-EXP: crystal soaked in Pb(NO3)2 solution for 20 mins
BUFNUM02	S.Das, Hyunuk Kim, K.Kim	J.Am.Chem.Soc.	2009	(Cd1 2+)1.5n,3n(H3 O1 1+),n(C336 H312 Cd12 O51 6-),6n(H2 O1)	catena-(Sesqui-cadmium(ii) tris(oxonium) octakis(mu!6$-5,5,10,10,15,15-hexaethyl-10,15-dihydro-5H-diindeno[1,2-a:1',2'-c]fluorene-2,7,12-tricarboxylato)-tris(mu!4$-oxo)-dodeca-cadmium(ii) hexahydrate)	catena-(Sesqui-cadmium(ii) tris(oxonium) octakis(mu!6$-5,5,10,10,15,15-hexaethyltruxene-2,7,12-tricarboxylato)-tris(mu!4$-oxo)-dodeca-cadmium(ii) hexahydrate)	colorless	Fm-3c	226	block	7.82	90	0.782	0	A number of uncoordinated water molecules are disordered. The Cd atom is partially occupied by a Pb atom with Cd:Pb occupancies 0.58:0.42, respectively. The sum formula is (Cd1 2+)1.5n,3n(H3 O1 1+),n(C336 H312 Cd6.96 O51 Pb5.04 6-),6n(H2 O1).	synchrotron radiation	Large structure in which program limits have been exceeded. A partial diagram showing the coordination of the ligands and the coordination of the Cd atoms has been input; The Cd atoms do not appear to be coordinated to water molecules as stated in the paper; The charge balancing Cd cations and oxonium cations could not be located and the exact identity and number of these cations is unclear; The …	TEMP: at 90 K RADIATION: synchrotron radiation "OTHER-EXP: crystal soaked in Pb(NO3)2 solution for 30 mins
BUFPAU	S.Das, Hyunuk Kim, K.Kim	J.Am.Chem.Soc.	2009	(Pb1 2+)1.5n,3n(H3 O1 1+),n(C336 H336 O63 Pb12 6-),6n(H2 O1)	catena-(Sesqui-lead(ii) tris(oxonium) octakis(mu!6$-5,5,10,10,15,15-hexaethyl-10,15-dihydro-5H-diindeno[1,2-a:1',2'-c]fluorene-2,7,12-tricarboxylato)-tris(mu!4$-oxo)-dodecaaqua-dodeca-lead(ii) hexahydrate)	catena-(Sesqui-lead(ii) tris(oxonium) octakis(mu!6$-5,5,10,10,15,15-hexaethyltruxene-2,7,12-tricarboxylato)-tris(mu!4$-oxo)-dodecaaqua-dodeca-lead(ii) hexahydrate)	colorless	Fm-3c	226	block	8.29	90	0.945	0	The coordinated water molecule is disordered. The Pb atom is partially occupied by a Cd atom with Pb:Cd occupancies 0.62:0.38, respectively. The sum formula is (Pb1 2+)1.5n,3n(H3 O1 1+),n(C336 H336 Cd4.56 O63 Pb7.44 6-),6n(H2 O1).	synchrotron radiation	Large structure in which program limits have been exceeded. A partial diagram showing the coordination of the ligands and the coordination of the Pb atoms has been input; The charge balancing Pb cations and oxonium cations could not be located and the exact identity and number of these cations is unclear; The total number of uncoordinated water molecules is unclear	TEMP: at 90 K RADIATION: synchrotron radiation "OTHER-EXP: crystal soaked in Pb(NO3)2 solution for 1 hour
BUFPAU01	S.Das, Hyunuk Kim, K.Kim	J.Am.Chem.Soc.	2009	(Pb1 2+)1.5n,3n(H3 O1 1+),n(C336 H336 O63 Pb12 6-),6n(H2 O1)	catena-(Sesqui-lead(ii) tris(oxonium) octakis(mu!6$-5,5,10,10,15,15-hexaethyl-10,15-dihydro-5H-diindeno[1,2-a:1',2'-c]fluorene-2,7,12-tricarboxylato)-tris(mu!4$-oxo)-dodecaaqua-dodeca-lead(ii) hexahydrate)	catena-(Sesqui-lead(ii) tris(oxonium) octakis(mu!6$-5,5,10,10,15,15-hexaethyltruxene-2,7,12-tricarboxylato)-tris(mu!4$-oxo)-dodecaaqua-dodeca-lead(ii) hexahydrate)	colorless	Fm-3c	226	block	7.65	90	0.952	0	The coordinated water molecule is disordered. The Pb atom is partially occupied by a Cd atom with Pb:Cd occupancies 0.84:0.16, respectively. The sum formula is (Pb1 2+)1.5n,3n(H3 O1 1+),n(C336 H336 Cd1.92 O63 Pb10.08 6-),6n(H2 O1).	synchrotron radiation	Large structure in which program limits have been exceeded. A partial diagram showing the coordination of the ligands and the coordination of the Pb atoms has been input; The charge balancing Pb cations and oxonium cations could not be located and the exact identity and number of these cations is unclear; The total number of uncoordinated water molecules is unclear	TEMP: at 90 K RADIATION: synchrotron radiation "OTHER-EXP: crystal soaked in Pb(NO3)2 solution for 2 hours
BUKRUW	Binbin Tu, Qingqing Pang, Doufeng Wu, Yuna Song, Linhong Weng, Qiaowei Li	J.Am.Chem.Soc.	2014	(C24 H12 N12 O14 Zn8)n	catena-[hexakis(mu-4-carboxylato-pyrazolato)-bis(mu-oxo)-octa-zinc unknown solvate]		light yellow	F23	196	octahedron	5.52	173	0.995	0.995	The SQUEEZE/PLATON program has been used to model some disorder.			TEMP: 173 K COLOR: light yellow "HABIT: octahedron
BUKRUW01	Binbin Tu, Qingqing Pang, Doufeng Wu, Yuna Song, Linhong Weng, Qiaowei Li	J.Am.Chem.Soc.	2014	(C24 H12 N12 O14 Zn8)n	catena-[hexakis(mu-4-carboxylato-pyrazolato)-bis(mu-oxo)-octa-zinc unknown solvate]		colorless	P213	198	octahedron	12.45	173	0.985	0.985	The structure is disordered.The SQUEEZE/PLATON program has been used to model some disorder.	twin		TEMP: 173 K OTHER-DIFF: twin
BUKRUW02	Binbin Tu, Qingqing Pang, Doufeng Wu, Yuna Song, Linhong Weng, Qiaowei Li	J.Am.Chem.Soc.	2014	(C24 H12 N12 O14 Zn8)n	catena-[hexakis(mu-4-carboxylato-pyrazolato)-bis(mu-oxo)-octa-zinc unknown solvate]		light yellow	P213	198	octahedron	12.23	173	0.985	0.985	The SQUEEZE/PLATON program has been used to model some disorder.	twin		TEMP: 173 K OTHER-DIFF: twin
BUKRUW03	Binbin Tu, Qingqing Pang, Doufeng Wu, Yuna Song, Linhong Weng, Qiaowei Li	J.Am.Chem.Soc.	2014	(C24 H12 N12 O14 Zn8)n	catena-[hexakis(mu-4-carboxylato-pyrazolato)-bis(mu-oxo)-hexa-zinc-di-cobalt unknown solvate]		light yellow	P213	198	octahedron	12.56	173	0.988	0.988	The SQUEEZE/PLATON program has been used to model some disorder.	twin		TEMP: 173 K OTHER-DIFF: twin
BUKSAD	Binbin Tu, Qingqing Pang, Doufeng Wu, Yuna Song, Linhong Weng, Qiaowei Li	J.Am.Chem.Soc.	2014	(C12 H24 N6 O17 Zn6)n	catena-[tris(mu-4-carboxylato-pyrazolato)-bis(mu-oxo)-nona-aqua-hexa-zinc unknown solvate]		light yellow	P213	198	octahedron	11.09	173	0.751	0.736	The SQUEEZE/PLATON program has been used to model some disorder.	twin		TEMP: 173 K OTHER-DIFF: twin
BUKSIL	Binbin Tu, Qingqing Pang, Doufeng Wu, Yuna Song, Linhong Weng, Qiaowei Li	J.Am.Chem.Soc.	2014	(C24 H12 Co2 N12 O14 Zn6)n	catena-[hexakis(mu-4-carboxylato-pyrazolato)-bis(mu-oxo)-hexa-zinc-di-cobalt unknown solvate]		purple	P213	198	octahedron	8.85	203	0.979	0.979	The SQUEEZE/PLATON program has been used to model some disorder.	twin		TEMP: 203 K OTHER-DIFF: twin
BUKTAE	Binbin Tu, Qingqing Pang, Doufeng Wu, Yuna Song, Linhong Weng, Qiaowei Li	J.Am.Chem.Soc.	2014	(C24 H12 N12 O14 Zn8)n	catena-[hexakis(mu-4-carboxylato-pyrazolato)-bis(mu-oxo)-hexa-zinc-di-cobalt unknown solvate]		light yellow	F23	196	octahedron	7.48	173	0.988	0.988	The SQUEEZE/PLATON program has been used to model some disorder. The authors states that it is impossible to locate the positions of CH3.	twin		TEMP: 173 K OTHER-DIFF: twin
BUKTEI	Binbin Tu, Qingqing Pang, Doufeng Wu, Yuna Song, Linhong Weng, Qiaowei Li	J.Am.Chem.Soc.	2014	(C24 H12 N12 O14 Zn8)n	catena-[hexakis(mu-4-carboxylato-pyrazolato)-bis(mu-oxo)-hexa-zinc-di-cobalt unknown solvate]		light yellow	F23	196	octahedron	7.66	173	0.993	0.993	The SQUEEZE/PLATON program has been used to model some disorder.The authors states that it is impossible to locate the positions of NH2.	twin		TEMP: 173 K OTHER-DIFF: twin
BUKTIM	Binbin Tu, Qingqing Pang, Doufeng Wu, Yuna Song, Linhong Weng, Qiaowei Li	J.Am.Chem.Soc.	2014	(C24 H12 N12 O14 Zn8)n	catena-[hexakis(mu-4-carboxylato-pyrazolato)-bis(mu-oxo)-hexa-zinc-di-cobalt unknown solvate]		purple	F23	196	octahedron	7.69	173	0.991	0.991	The SQUEEZE/PLATON program has been used to model some disorder. The authors states that it is impossible to locate the positions of CH3.	twin		TEMP: 173 K OTHER-DIFF: twin
BUKTOS	Binbin Tu, Qingqing Pang, Doufeng Wu, Yuna Song, Linhong Weng, Qiaowei Li	J.Am.Chem.Soc.	2014	(C24 H12 N12 O14 Zn8)n	catena-[hexakis(mu-4-carboxylato-pyrazolato)-bis(mu-oxo)-hexa-zinc-di-cobalt unknown solvate]		purple	F23	196	octahedron	4.68	173	0.991	0.991	The SQUEEZE/PLATON program has been used to model some disorder. The authors states that it is impossible to locate the positions of NH2.	twin		TEMP: 173 K OTHER-DIFF: twin
BUPDOH	Chengling Song, Jiayi Hu, Yajing Ling, Yunlong Feng, De-Li Chen, Yabing He	Dalton Trans.	2015	(C20 H12 Cu2 N2 O10)n	catena-[(mu-5,5'-pyridazine-3,6-diyldibenzene-1,3-dicarboxylato)-aqua-di-copper unknown solvate]	ZJNU-47		R-3m	166	BLOCK	7.08	293	0.736	0.731	C6,C7,C8,C9,N1,N2 disordered by symmetry over four configurations with occupancies 0.50,0.25,0.25,0.50,0.25,0.25; The SQUEEZE/PLATON program has been used to model some disorder.	293 K		TEMP: 293 K HABIT: BLOCK
BUQKUV	L.V.Tsymbal, I.L.Andriichuk, Ya D.Lampeka, V.B.Arion	J.Struct.Chem.	2014	(C63 H57 N9 Ni3 O15)n	catena-[bis(mu!3$-Benzene-1,3,5-tricarboxylato)-nonapyridine-diaqua-tri-nickel(ii) unknown solvate]		blue	R-3c	167	block	6.33	296	0.973	0.973	Disordered solvent molecules were not modelled and the disordered density was taken into account using the SQUEEZE/PLATON procedure.	296 K		TEMP: 296 K COLOR: blue "HABIT: block
BUSPIP	C.Volkringer, D.Popov, T.Loiseau, G.Ferey, M.Burghammer, C.Riekel, M.Haouas, F.Taulelle	Chem.Mater.	2009	(C30 H24 Al9 O35 W2)n	catena-((mu!6$-1,3,5-benzenetricarboxylato)-bis(mu!4$-1,3,5-benzenetricarboxylato)-tris(mu!3$-oxo)-bis(mu!2$-formato)-tetrakis(mu!2$-oxo)-tetra-aqua-methoxy-oxo-nona-aluminium-di-tungsten)	MIL-100	colorless	Fd-3m	227	polyhedron	17.44	100	0.112	0.803	W1 and W2 disordered over two sites with occupancies 0.50:0.50.	synchrotron radiation	Large structure in which program limits have been exceeded. A partial 2D diagram and its name have been given. available from the deposited CIF. A 2D diagram and a compound name are pending	TEMP: at 100 K RADIATION: synchrotron radiation
BUTPIR	E.T.Nguyen, Xiang Zhao, Daniel Ta, Phuong-Lan Nguyen, Xianhui Bu	Cryst.Growth Des.	2015	(C66 H74 N4 O16 Zn4)n	catena-[(mu-4-(2,4,5-tri(pyridin-4-yl)phenyl)pyridine)-tetrakis(mu-camphorato)-tetra-zinc unknown solvate]		colorless	I222	23	block	5.56	174	0.861	0.861	The SQUEEZE/PLATON program has been used to model some disorder.			TEMP: 174 K COLOR: colorless "HABIT: block
BUXNOZ	Cheng Hang, Zhi-Yong Lu, Fei Meng, Jing-Jing Jiang, Jun-Feng Bai	Wuji Huaxue Xuebao(Chin.)(Chin.J.Inorg.Chem.)	2015	(C84 H56 Cu10 N16 O50)n	catena-[tetrakis(mu-5,5'-[1H-pyrazole-3,5-diylbis(carbonylimino)]dibenzene-1,3-dicarboxylato)-deca-aqua-deca-copper unknown solvate]		blue	Pbcm	57	block	9.1	293	0.862	0.855	The SQUEEZE/PLATON program has been used to model some disorder.	293 K		TEMP: 293 K OTHER-EXP: Adsorption properties
BUXZAX	M.Hassan Beyzavi, N.A.Vermeulen, A.J.Howarth, S.Tussupbayev, A.B.League, N.M.Schweitzer, J.R.Gallagher, A.E.Platero-Prats, N.Hafezi, A.A.Sarjeant, J.T.Miller, K.W.Chapman, J.Fraser Stoddart, C.J.Cramer, J.T.Hupp, O.K.Farha	J.Am.Chem.Soc.	2015	(Fe1 3+)n,n(C48 H32 Cl1 Fe1 Hf3 N4 O16 3-)	catena-[Iron(iii) (mu!9$-5,10,15,20-tetrakis(4-carboxylatophenyl)porphyrinato)-bis(mu!3$-hydroxo)-bis(mu!3$-oxo)-diaqua-chloro-dihydroxy-tri-hafnium(iii)-iron(iii) unknown solvate]		orange	P6/mmm	191	needle	4.33	250	0.602	0.6	Cl1 and Cl1A disordered over two sites with occupancies 0.713:0.287; The MASK/OLEX2 program has been used to model some disorder.			TEMP: 250.0 K COLOR: orange "HABIT: needle
BZLITE01	T.Tatic, S.Hermann, D.Stalke	Organometallics	2012	(C26 H38 Li2 N4)n	catena-[bis(mu!2$-1,4-Diazabicyclo[2.2.2]octane)-dibenzyl-di-lithium]		yellow	P21	4	needle	3.67	100	0.603	1.206				TEMP: at 100 K COLOR: yellow "HABIT: needle
CACKEZ	Le Le Gong, Xue Feng Feng, Feng Luo, Xian Feng Yi, An Min Zheng	Green Chemistry	2016	(C52 H32 N8 O16 Zn2)n	catena-[bis(mu-4,4'-ethene-1,2-diyldipyridine)-bis(mu-2,2'-dinitrobiphenyl-4,4'-dicarboxylato)-di-zinc]		colorless	P21/c	14	Block	12.19	113	0.655	0.655				TEMP: 113 K COLOR: colorless "HABIT: Block
CAGKIG01	L.D.DeVries, P.M.Barron, E.P.Hurley, Chunhua Hu, Wonyoung Choe	J.Am.Chem.Soc.	2011	(C40 H26 Cd1 I2 N8)n	catena-[(mu!4$-5,10,15,20-tetrakis(4-Pyridyl)porphyrin-N,N',N'',N''')-bis(iodo)-cadmium(ii) unknown solvate]	HMOF-1	red	Pnnm	58	needle	4.76	200	0.997	0.997	C11,C12,C13,C14 disordered by symmetry over two sites with occupancy 0.50. The N-H hydogen atom of the porphyrin is disordered by symmetry. Disordered solvent molecules were not modelled and the disordered density was taken into account using the SQUEEZE/PLATON procedure.			TEMP: at 200 K COLOR: red "HABIT: needle "OTHER-CELL: 15 additional unit cell measurements at temperatures from 100 K - 360 K from synchrotron X-ray powder diffraction
CAGKIG02	L.D.DeVries, P.M.Barron, E.P.Hurley, Chunhua Hu, Wonyoung Choe	J.Am.Chem.Soc.	2011	(C40 H26 Cd1 I2 N8)n	catena-[(mu!4$-5,10,15,20-tetrakis(4-Pyridyl)porphyrin-N,N',N'',N''')-bis(iodo)-cadmium(ii) unknown solvate]	HMOF-1	red	Pnnm	58	needle	4.53	297	0.977	0.977	C11,C12,C13,C14 disordered by symmetry over two sites with occupancy 0.50. The N-H hydogen atom of the porphyrin is disordered by symmetry. Disordered solvent molecules were not modelled and the disordered density was taken into account using the SQUEEZE/PLATON procedure.	at 297 K		TEMP: at 297 K COLOR: red "HABIT: needle "OTHER-CELL: 15 additional unit cell measurements at temperatures from 100 K - 360 K from synchrotron X-ray powder diffraction
CAJQEL	J.F.Eubank, H.Mouttaki, A.J.Cairns, Y.Belmabkhout, L.Wojtas, R.Luebke, M.Alkordi, M.Eddaoudi	J.Am.Chem.Soc.	2011	(C42 H30 Cu4 O24)n	catena-[(mu!16$-5,5',5'',5'''-(1,2,4,5-Benzenetetramethoxy)tetraisophthalato)-tetraaqua-tetra-copper]		green	Fmmm	69	block	7.62	100	0.752	0		synchrotron radiation		TEMP: at 100 K RADIATION: synchrotron radiation
CAJQIP	J.F.Eubank, H.Mouttaki, A.J.Cairns, Y.Belmabkhout, L.Wojtas, R.Luebke, M.Alkordi, M.Eddaoudi	J.Am.Chem.Soc.	2011	(C69 H51 Cu4 N9 O24)n	catena-[(mu!16$-5,5',5'',5'''-(1,2,4,5-Benzenetetrakis(4-methoxyphenylazo)tetraisophthalato))-triaqua-dimethylformamide-tetra-copper]		green	Fmmm	69	block	8.7	100	0.591	0.589	The coordinated dmf molecule is disordered by symmetry.	synchrotron radiation		TEMP: at 100 K RADIATION: synchrotron radiation
CAVPEW	Qingxia Yao, Junliang Sun, Kuo Li, Jie Su, M.V.Peskov, Xiaodong Zou	Dalton Trans.	2012	(C138 H84 Co6 N6 O24)n,n(C3 H7 N1 O1),n(H2 O1)	catena-(tetrakis(mu!6$-4,4',4''-Benzene-1,3,5-triyltris(benzoato))-tris(mu!2$-4,4'-bipyridine)-hexa-cobalt dimethylformamide solvate hydrate)		brown	Pm-3n	223	polyhedron	8.34	293	0.417	0	C8,C8,C9,C9 disordered by symmetry over two sites with occupancy 0.50. The SQUEEZE/PLATON program was used to model an unspecified number of disordered dimethylformamide and water molecules.	at 293 K		TEMP: at 293 K COLOR: brown "HABIT: polyhedron
CAVPIA	Qingxia Yao, Junliang Sun, Kuo Li, Jie Su, M.V.Peskov, Xiaodong Zou	Dalton Trans.	2012	(C138 H84 Cu6 N6 O24)n,n(C3 H7 N1 O1),n(H2 O1)	catena-(tetrakis(mu!6$-4,4',4''-Benzene-1,3,5-triyltris(benzoato))-tris(mu!2$-4,4'-bipyridine)-hexa-copper dimethylformamide solvate hydrate)		dark green	Pm-3n	223	polyhedron	12.34	293	0.431	0	C8,C8,C9,C9 disordered by symmetry over two sites with occupancy 0.50. The SQUEEZE/PLATON program was used to model an unspecified number of disordered dimethylformamide and water molecules.	at 293 K		TEMP: at 293 K COLOR: dark green "HABIT: polyhedron
CAVPUM	Qingxia Yao, Junliang Sun, Kuo Li, Jie Su, M.V.Peskov, Xiaodong Zou	Dalton Trans.	2012	(C138 H84 N6 O24 Zn6)n,n(C3 H7 N1 O1),n(H2 O1)	catena-(tetrakis(mu!6$-4,4',4''-Benzene-1,3,5-triyltris(benzoato))-tris(mu!2$-4,4'-bipyridine)-hexa-zinc dimethylformamide solvate hydrate)		green	Pm-3n	223	polyhedron	9.55	293	0.422	0	C8,C8,C9,C9 disordered by symmetry over two sites with occupancy 0.50. The SQUEEZE/PLATON program was used to model an unspecified number of disordered dimethylformamide and water molecules. Each of the sites represented as Zn is a mixed Zn/Ni site with occupancies 0.62:0.38.	at 293 K		TEMP: at 293 K COLOR: green "HABIT: polyhedron
CAXTOM	I.M.Hauptvogel, V.Bon, R.Grunker, I.A.Baburin, I.Senkovska, U.Mueller, S.Kaskel	Dalton Trans.	2012	(C90 H60 O15 Zn3)n	catena-[(mu!6$-4,4',4''-(Benzene-1,3,5-triyl-tris(benzene-4,1-diyl))tribenzoato)-(mu!5$-4,4',4''-(benzene-1,3,5-triyl-tris(benzene-4,1-diyl))tribenzoato)-triaqua-tri-zinc(ii) unknown solvate]	DUT-41	colorless	Cc	9	block	5.67	293	0.569	0	Disordered solvent molecules were not modelled and the disordered density was taken into account using the SQUEEZE/PLATON procedure. The unit cell was found to contain two voids of 6234 A$3!, each holding 2124 electrons.	synchrotron radiation; racemic twin; at 293 K		TEMP: at 293 K RADIATION: synchrotron radiation "OTHER-DIFF: racemic twin
CAYQIE	D.J.Mihalcik, Teng Zhang, Liqing Ma, Wenbin Lin	Inorg.Chem.	2012	(C128 H76 Cu8 O44)n	catena-(bis(mu!16$-2,2'diethoxy-1,1'-binaphthyl-4,4',6.6'-tetrakis(ethynylphenyl-3,5-dicarboxylato))-octa-aqua-octa-copper)		green	P4	75	thin plate	6.35	200	0.603	0.592	The binaphthyl moieties are equally disordered over two sites by symmetry.			TEMP: at 200 K COLOR: green "HABIT: thin plate
CAYQOK	D.J.Mihalcik, Teng Zhang, Liqing Ma, Wenbin Lin	Inorg.Chem.	2012	(C120 H60 Cu8 O44)n	catena-(bis(mu!16$-2,2'dihydroxy-1,1'-binaphthyl-4,4',6.6'-tetrakis(ethynylphenyl-3,5-dicarboxylato))-octa-aqua-octa-copper)		green	C222	21	thin plate	8.56	200	0.595	0.587	The binaphthyl moieties are equally disordered over two sites by symmetry.			TEMP: at 200 K COLOR: green "HABIT: thin plate
CAYQUQ	D.J.Mihalcik, Teng Zhang, Liqing Ma, Wenbin Lin	Inorg.Chem.	2012	(C148 H85 Cu8 O44)n	catena-(bis(mu!16$-2,2'dibenzyloxy-1,1'-binaphthyl-4,4',6.6'-tetrakis(ethynylphenyl-3,5-dicarboxylato))-octa-aqua-octa-copper)		green	P4	75	thin plate	4.95	296	0.644	0.646		at 296 K	Large structure in which program limits have been exceeded. A full set of coordinates are available from the deposited CIF	TEMP: at 296 K COLOR: green "HABIT: thin plate
CAZKOF	D.Rankine, A.Avellaneda, M.R.Hill, C.J.Doonan, C.J.Sumby	Chem.Commun.	2012	(C16 H12 O7 Zn2)n,2n(C3 H7 N1 O1)	catena-((mu!4$-2,2'-dimethoxybiphenyl-4,4'-dicarboxylato)-(mu!4$-oxo)-tetra-zinc N,N-dimethylformamide solvate)		colorless	R-3m	166	block	4.76	150	0.782	0.784	C2',C3',C5',C6',C8',O7' disordered by symmetry over two sites with occupancy 0.50; C8 disordered by symmetry over two sites with occupancy 0.50; The SQUEEZE/PLATON program has been used to model some disorder.			TEMP: at 150 K COLOR: colorless "HABIT: block
CAZNOI	Fei-Yan Yi, Jian Zhang, Hai-Xia Zhang, Zhong-Ming Sun	Chem.Commun.	2012	(C2 H8 N1 1+)n,n(C70 H52 Co3 N6 O21 1-)	catena-(Dimethylammonium (mu!11$-4-(3-(4-carboxyphenoxy)-2-((3-(4-carboxyphenoxy)-2,2-bis((4-carboxyphenoxy)methyl)propoxy)methyl)-2-((4-carboxyphenoxy)methyl)propoxy)benzoato)-(mu!3$-oxo)-(mu!3$-2,4,6-tri(pyridin-4-yl)-1,3,5-triazine)-tri-cobalt)		red	P21	4	brick	10.35	273	0.712	0.712				TEMP: at 273 K COLOR: red "HABIT: brick
CAZNUO	Fei-Yan Yi, Jian Zhang, Hai-Xia Zhang, Zhong-Ming Sun	Chem.Commun.	2012	(C2 H8 N1 1+)3n,n(C70 H52 Co3 N6 O20 3-),1.5n(H2 O1)	catena-(tris(Dimethylammonium) (mu!12$-4-(3-(4-carboxyphenoxy)-2-((3-(4-carboxyphenoxy)-2,2-bis((4-carboxyphenoxy)methyl)propoxy)methyl)-2-((4-carboxyphenoxy)methyl)propoxy)benzoato)-(mu!3$-oxo)-(mu!3$-2,4,6-tri(pyridin-4-yl)-1,3,5-triazine)-tri-cobalt sesquihydrate)		red	C2	5	brick	7.89	273	0.772	0.772	The structure is disordered.			TEMP: at 273 K COLOR: red "HABIT: brick
CEKNIQ	Qian-Rong Fang, Guang-Shan Zhu, Ming Xue, Qing-Lin Zhang, Jin-Yu Sun, Xiao-Dan Guo, Shi-Lun Qiu, Shi-Tao Xu, Ping Wang, De-Jun Wang, Yen Wei	Chem.-Eur.J.	2006	(C60 H44 O24 Zn7)n	catena-(tetrakis(mu!5$-p-phenylenediacrylato)-(mu!4$-p-phenylenediacrylato)-bis(mu!4$-oxo)-diaqua-hepta-zinc)		buff	I4cm	108	block	11	293	0.432	0.431	One ligand has imposed disorder.	at 293 K		TEMP: at 293 K COLOR: buff "HABIT: block
CENQAP	Yan-Ping He, Yan-Xi Tan, Jian Zhang	Cryst.Growth Des.	2013	(C117 H72 N3 O18 Zn4 1-)n,n(C4 H12 N1 1+),28n(C3 H7 N1 O1)	catena-(Tetramethylammonium bis(mu!6$-tris(4'-carboxylatobiphenyl-4-yl)amine)-(mu!5$-tris(4'-carboxylatobiphenyl-4-yl)amine)-tetra-zinc dimethylformamide solvate)	FIR-4	yellow	Pna21	33	prism	6.81	293	0.64	0.632	The SQUEEZE/PLATON program was used to model the disordered cation and solvent molecules.	at 293 K		TEMP: at 293 K COLOR: yellow "HABIT: prism
CENWUP	S.E.Baillie, W.Clegg, P.Garcia-Alvarez, E.Hevia, A.R.Kennedy, J.Klett, L.Russo	Organometallics	2012	(C32 H81 Li2 Mg2 O2 Si6)n,n(C16 H41 Li1 Mg1 O1 Si3)	catena-((tetrahydrofuran)-(tris(mu!2$-(trimethylsilyl)methyl))-lithium-magnesium bis(tetrahydrofuran)pentakis(mu!2$-(trimethylsilyl)methyl)-di-lithium-di-magnesium)		colorless	P212121	19	block	8.45	123	0.959	0.958	C2A,C3A and C5A,C6A disordered over two sites with occupancies 0.50:0.50; C2B,C3B and C5B,C6B disordered over two sites with occupancies 0.50:0.50; C81,C82 and C81A,C82A disordered over two sites with occupancies 0.50:0.50; C2C,C3C,C4C and C5C,C6C,C7C disordered over two sites with occupancies 0.50:0.50.			TEMP: at 123 K COLOR: colorless "HABIT: block
CESFIQ	Xiang Lin, Junhua Jia, Xuebo Zhao, K.M.Thomas, A.J.Blake, G.S.Walker.N.R.Champness, P.Hubberstey, M.Schroder	Angew.Chem.,Int.Ed.	2006	(C28 H18 Cu2 O10)n,1.5n(C3 H7 N1 O1),2.5n(C4 H8 O2),3n(H2 O1)	catena-((mu!8$-p-Quaterphenyl-3,3''',5,5'''-tetracarboxylato)-diaqua-di-copper dimethylformamide 1,4-dioxane solvate trihydrate)		blue	R-3m	166	block	3.93	150	0.995	1.005	The central biphenyl group is disordered equally over two sets of positions, by symmetry. The disordered solvent molecules were taken into account using PLATON/SQUEEZE.			TEMP: at 150 K COLOR: blue "HABIT: block
CETGOY	Zhen-Feng Chen, Shu-Feng Zhang, Hai-Sheng Luo, B.F.Abrahams, Hong Liang	CrystEngComm	2007	(C100 H126 N4 Ni2 O9)n	catena-(bis(mu!2$-Dehydroabietato-O,O')-(mu!2$-aqua)-bis(mu!2$-4,4'-bipyridyl)-bis(dehydroabietato-O)-di-nickel(ii))		yellow-green	P3121	152	block	7.69	193	0.974	0.974	One isopropyl group has two C atoms disordered over two positions with occupancy 0.61:0.39 and a phenyl ring and associated isopropyl moiety have similar disorder with occupancy 0.498:0.502.			TEMP: at 193 K COLOR: yellow-green "HABIT: block
CEVREB	S.Delgado, A.Molina-Ontoria, M.E.Medina, C.J.Pastor, R.Jimenez-Aparicio, J.L.Priego	Inorg.Chem.Commun.	2006	(C10 H8 Cu1 N2 O5 S2)n	catena-((mu!2$-2-Pyridylsulfinato)-(mu!2$-2-pyridylsulfonato)-copper(ii))		green	C2/c	15	prism	2.74	100	0.98	0	The sulfinate and sulfonate groups are disordered.			TEMP: at 100 K OTHER-EXP: weakly ferromagnetic
CEVZAE	L.M.Engelhardt, W.-P.Leung, C.L.Raston, P.Twiss, A.H.White	J.Chem.Soc.,Dalton Trans.	1984	(C26 H44 Li2 N4)n	catena-[bis(N,N,N',N'-tetramethylethane-1,2-diamine)-(2,2'dimethylbiphenyl)-di-lithium]	catena(alpha,alpha'-bis((N,N,N',N'-Tetramethylethylenediamine)-lithio)-2,2'-dimethylbiphenyl)	orange-yellow	P41212	92		8.9	295	0.883	0.85			Molecular formula, formula weight and calculated density given incorrectly in paper
CIFKAF	Wan-Seok Kim, Kyung Yeon Lee, Eui-Hyun Ryu, Ja-Min Gu, Youngmee Kim, Suk Joong Lee, Seong Huh	Eur.J.Inorg.Chem.	2013	(C70 H66 N8 O4 Zn2)n,n(C4 H11 N1)	catena-((mu!4$-2,2',2'',2'''-(Benzene-1,2,4,5-tetrayltetrakis(nitrilomethylylidene))tetrakis(6-t-butyl-4-(pyridin-4-yl)phenolato))-di-zinc diethylamine solvate)		red	P21/c	14	block	12.47	273	0.979	0.971				TEMP: at 273 K COLOR: red "HABIT: block
COCNEP	I.Timokhin, A.J.P.White, P.D.Lickiss, C.Pettinari, R.P.Davies	CrystEngComm	2014	(C120 H132 Cu6 N60 O12 Si3)n,6(C3 H7 N1 O1)	catena-(tris(mu-tetrakis(4-(tetrazol-5-yl)phenyl)silane)-dodecakis(N,N-dimethylformamide)-hexa-copper N,N-dimethylformamide solvate)	IMP-17Cu	blue green	Ia-3d	230	Prism	13.59	100	0.984	0	Disordered solvent molecules were not modelled and the disordered density was taken into account using the SQUEEZE/PLATON procedure.			TEMP: at 100 K COLOR: blue green "HABIT: Prism
COGWEB	O.K.Farha, K.L.Mulfort, A.M.Thorsness, J.T.Hupp	J.Am.Chem.Soc.	2008	(C56 H28 N4 O12 Zn2)n,5n(H2 O1)	catena-(bis(mu!4$-2,6-Naphthalenedicarboxylato)-(mu!2$-N,N'-bis(5-aminoquinoline)-1,4,5,8-naphthalenetetracarboxydiimide)-di-zinc pentahydrate)		yellow	P21	4	block	9.81	100	0.999	0	Disordered water molecules have been removed using SQUEEZE/PLATON.			TEMP: at 100 K COLOR: yellow "HABIT: block
COJMOF	Zhichao Hu, Kui Tan, W.P.Lustig, Hao Wang, Yonggang Zhao, Chong Zheng, D.Banerjee, T.J.Emge, Y.J.Chabal, Jing Li	Chemical Science	2014	(C40 H24 N2 O8 Zn2)n,C4 H9 N1 O1	catena-(bis(mu-9H-fluorene-2,7-dicarboxylato)-(mu-4,4'-bipyridine)-di-zinc N,N-dimethylacetamide solvate)	LMOF-202	colorless	C2/c	15	needle	6.93	295	0.96	0	Disordered solvent molecules were not modelled.	at 295 K	The total number of solvent molecules is unclear	TEMP: at 295 K OTHER-EXP: Luminescent
COJMOF01	Zhichao Hu, Kui Tan, W.P.Lustig, Hao Wang, Yonggang Zhao, Chong Zheng, D.Banerjee, T.J.Emge, Y.J.Chabal, Jing Li	Chemical Science	2014	(C40 H24 N2 O8 Zn2)n,C4 H9 N1 O1	catena-(bis(mu-9H-fluorene-2,7-dicarboxylato)-(mu-4,4'-bipyridine)-di-zinc N,N-dimethylacetamide solvate)	LMOF-202	colorless	C2/c	15	needle	4.36	295	0.96	0	Disordered solvent molecules were not modelled and the disordered density was taken into account using the SQUEEZE/PLATON procedure.	at 295 K	The total number of solvent molecules is unclear	TEMP: at 295 K OTHER-EXP: Luminescent
COJMOF02	Zhichao Hu, Kui Tan, W.P.Lustig, Hao Wang, Yonggang Zhao, Chong Zheng, D.Banerjee, T.J.Emge, Y.J.Chabal, Jing Li	Chemical Science	2014	(C40 H24 N2 O8 Zn2)n,C4 H9 N1 O1	catena-(bis(mu-9H-fluorene-2,7-dicarboxylato)-(mu-4,4'-bipyridine)-di-zinc N,N-dimethylacetamide solvate)	LMOF-202	colorless	C2/c	15	needle	9.7	100	0.969	0	The structure is disordered; Disordered solvent molecules were not modelled.		The total number of solvent molecules is unclear	TEMP: at 100 K OTHER-EXP: Luminescent
COKRUR	Wen-Yang Gao, Zhuxiu Zhang, Lindsay Cash, L.Wojtas, Yu-Sheng Chen, Shengqian Ma	CrystEngComm	2013	(C72 H44 In2 N4 O10)n	catena-[(mu!5$-4',4'',4''',4''''-Porphyrinato-5,10,15,20-tetrayltetrabiphenyl-4-carboxylato)-diaqua-di-indium unknown solvate]	MMPF-8	red	Cc	9	block	6.99	100	0.91	0.907	Disordered solvent molecules were not modelled and the disordered density was taken into account using the SQUEEZE/PLATON procedure.	synchrotron radiation		TEMP: at 100 K RADIATION: synchrotron radiation
CONKIB	T.B.Faust, P.M.Usov, D.M.D'Alessandro, C.J.Kepert	Chem.Commun.	2014	(C28 H24 N4 Ni2 O2 S8 Zn1)n	catena-[tetrakis(mu!2$-1-(pyridin-4-yl)ethene-1,2-dithiolato)-diaqua-di-nickel-zinc]		dark purple	P31c	159	rod	11.82	100	0.557	0.554		synchrotron radiation	We calculate 74% void space in the structure	TEMP: at 100 K RADIATION: synchrotron radiation
COQTEJ	A.Mallick, B.Garai, M.A.Addicoat, P.St.Petkov, T.Heine, R.Banerjee	Chemical Science	2015	(C72 H52 Mg4 N8 O30)n	catena-[bis(mu-5,5'-(1,3,6,8-tetraoxo-1,3,6,8-tetrahydrobenzo[lmn][3,8]phenanthroline-2,7-diyl)diisophthalato)-tetrakis(N,N-dimethylformamide)-diaqua-tetra-magnesium]		pale yellow	P2/c	13	Block	10.57	293	0.877	0	Short C=O bond at O5.	293 K		TEMP: 293 K COLOR: pale yellow "HABIT: Block
CUBBEI	Hongmin Su, Fuxing Sun, Jiangtao Jia, Hongming He, Aifei Wang, Guangshan Zhu	Chem.Commun.	2015	(C42 H34 O12 Zn3)n	catena-[bis(mu-4,4'-[3-oxido-5-oxohepta-1,3,6-triene-1,7-diyl]bis(2-methoxyphenolato))-tri-zinc]	Medi-MOF-1	red	P3221	154	block	6.92	293	0.66	0.66		293 K		TEMP: 293 K COLOR: red "HABIT: block
CUCFOX	A.Karmakar, B.Manna, A.V.Desai, B.Joarder, S.K.Ghosh	Inorg.Chem.	2014	(C16 H22 N10 O2 Zn1 2+)n,2n(N1 O3 1-)	catena-(bis(mu!2$-N''-(1-(Pyridin-4-yl)ethylidene)carbonohydrazide)-zinc dinitrate unknown solvate)			C2/c	15		6.81	200	0.845	0.845	The SQUEEZE/PLATON program was used to model some disordered solvent.			TEMP: at 200 K
CUFOHY	K.Okada, M.I.Kay, D.T.Cromer, I.Almodovar	J.Chem.Phys.	1966	(C2 H6 Cu1 O6)n,2n(H2 O1)	catena-(Diaqua-bis(mu!2$-formato-O,O')-copper(ii) dihydrate)			P21/a	14		0	295	0.899	0	Coordinates of partially disordered water molecules are not retained.	neutron radiation		RADIATION: neutron radiation POLYMORPH: paraelectric polymorph
CUMFEW	K.Uemura, F.Onishi, Y.Yamasaki, H.Kita	J.Solid State Chem.	2009	(C22 H18 N4 O12 Zn2)n	catena-(bis(mu!4$-2-nitrobenzene-1,4-dicarboxylato)-(mu!2$-1,4-diazabicyclo(2.2.2)octane)-di-zinc)		yellow	P4/mmm	123	block	3.4	298	0.948	0	The structure is disordered by symmetry.	at 298 K	28% void space in the structure	TEMP: at 298 K COLOR: yellow "HABIT: block
CUMFEW01	S.Henke, Wei Li, A.K.Cheetham	Chemical Science	2014	(C22 H18 N4 O12 Zn2)n	catena-[bis(mu!4$-2-nitrobenzene-1,4-dicarboxylato)-(mu!2$-1,4-diazabicyclo[2.2.2]octane)-di-zinc(ii) unknown solvate]	NO2-DMOF	light yellow	Pban	50	block	6.27	270	0.964	0.964	The structure is disordered. Disordered solvent molecules were not modelled and the disordered density was taken into account using the SQUEEZE/PLATON procedure.			TEMP: 270 K COLOR: light yellow "HABIT: block
CUQSAK	F.L.Thorp-Greenwood, T.K.Ronson, M.J.Hardie	Chemical Science	2015	(C264 H210 Cu11 N30 O54 2+)n,2n(C1 N1 1-),2n(C3 H7 N1 O1)	catena-[dodecakis(mu-cyano)-tris(mu-3,8,13-trimethoxy-10,15-dihydro-5H-tribenzo[a,d,g][9]annulene-2,7,12-triyl triisonicotinate)-octa-copper(i)-tri-copper(ii) bis(cyanide) N,N-dimethylformamide solvate]	catena-[dodecakis(mu-cyano)-tris(mu-tris(isonicotinoyl)cyclotriguaiacyclene)-octa-copper(i)-tri-copper(ii) bis(cyanide) N,N-dimethylformamide solvate]	orange	R-3	148	plate	8.81	100	0.699	0.699	Disordered cyanide ions and N,N-dimethylformamide solvent molecules were not modelled and the disordered density was taken into account using the SQUEEZE/PLATON procedure.			TEMP: 100 K COLOR: orange "HABIT: plate
CUQSEO	F.L.Thorp-Greenwood, T.K.Ronson, M.J.Hardie	Chemical Science	2015	(C168 H162 Cu3 N12 O27 6+)n,6n(C1 F3 O3 S1 1-),n(C2 H6 O1 S1)	catena-[tetrakis(mu-4,4',4''-((3,8,13-trimethoxy-10,15-dihydro-5H-tribenzo[a,d,g][9]annulene-2,7,12-triyl)tris(oxymethylene))tripyridine)-triaqua-tri-copper hexakis(trifluoromethanesulfonate) dimethyl sulfoxide solvate]	catena-[tetrakis(mu-tris(4-pyridyl-methyl)cyclotriguaiacyclene)-triaqua-tri-copper hexatriflate dimethyl sulfoxide solvate]	lilac	C2/c	15	needles	9	120	0.553	0	Disordered triflate anions and dimethyl sulfoxide solvent molecules were not modelled and the disordered density was taken into account using the SQUEEZE/PLATON procedure.			TEMP: 120 K COLOR: lilac "HABIT: needles
CUQTEP	F.L.Thorp-Greenwood, T.K.Ronson, M.J.Hardie	Chemical Science	2015	(C86 H84 Br3 Cu2 N6 O13 S1 1+)n,n(Br1 1-),3.5n(C2 H6 O1 S1)	catena-[bis(mu-4,4',4''-((3,8,13-trimethoxy-10,15-dihydro-5H-tribenzo[a,d,g][9]annulene-2,7,12-triyl)tris(oxymethylene))tripyridine)-tribromo-(dimethyl sulfoxide)-di-copper(ii) bromide dimethyl sulfoxide solvate]	catena-[bis(mu-(tris(4-pyridyl)methyl)cyclotriguaiacyclene)-tribromo-(dimethyl sulfoxide)-di-copper(ii) bromide dimethyl sulfoxide solvate]	green	P-1	2	block	11.49	150	0.935	0	C76,C77,C78,C79,C80,C81 and C76',C77',C78',C79',C80',C81' disordered over two sites with occupancies 0.50,0.50,0.50,0.50,0.55,0.50:0.50; C84' and C84 disordered over two sites with occupancies 0.55:0.45; N6 and N6' disordered over two sites with occupancies 0.50:0.50; Disordered dimethyl sulfoxide solvent molecules were not modelled and the disordered density was taken into account using the SQUE…		The bromide anions have not been located	TEMP: 150 K COLOR: green "HABIT: block
CUSXIY	H.Furukawa, N.Ko, Yong Bok Go, N.Aratani, Sang Beom Choi, Eunwoo Choi, A.O.Yazaydin, R.Q.Snurr, M.O'Keeffe, Jaheon Kim, O.M.Yaghi	Science	2010	(C66 H30 O13 Zn4)n,H2 O1	catena-[bis(mu-4,4',4''-(benzene-1,3,5-triyl-tris(ethyne-2,1-diyl)tribenzoato))-(mu-oxido)-tetra-zinc]	MOF-180;		P-31c	163	hexagonal plate	58.43	258	0.258	0.254	The structure is disordered.		Large structure in which program limits have been exceeded. A 2D diagram and a compound name are pending. U.S. Patent: US8841471B2; E.P. Patent: EP2467388A2; E.P. Patent: EP2467388A4; U.S. Patent: US20120172612; W.O. Patent: WO2011038208A2; W.O. Patent: WO2011038208A3	TEMP: 258 K HABIT: hexagonal plate
CUSXOE	H.Furukawa, N.Ko, Yong Bok Go, N.Aratani, Sang Beom Choi, Eunwoo Choi, A.O.Yazaydin, R.Q.Snurr, M.O'Keeffe, Jaheon Kim, O.M.Yaghi	Science	2010	(C90 H54 O16 Zn4)n,H2 O1	catena-[bis(mu-4,4',4''-(benzene-1,3,5-triyl-tris(benzene-4,1-diyl)tribenzoato))-(mu-oxido)-tetra-zinc]	MOF-200		P-31c	163	hexagonal plate	6.86	100	0.224	0.222	The structure is disordered. The SQUEEZE/PLATON program has been used to model the solvent molecules.	synchrotron radiation	Large structure in which program limits have been exceeded. A 2D diagram and a compound name are pending.U.S. Patent: US8841471B2; E.P. Patent: EP2467388A2; E.P. Patent: EP2467388A4; U.S. Patent: US20120172612; W.O. Patent: WO2011038208A2; W.O. Patent: WO2011038208A3	TEMP: 100 K RADIATION: synchrotron radiation
CUTFON	Yan Liu, Xin Xu, Qingchun Xia, Guozan Yuan, Qizhuang He, Yong Cui	Chem.Commun.	2010	(C90 H96 Ag2 B2 N7 O3 1+)n,n(N1 O3 1-),4n(H2 O1)	catena-(bis(mu!3$-4,4',4''-(Boranetriyltris(2,3,5,6-tetramethyl-4,1-phenylene))tripyridine)-(mu!2$-nitrato)-di-silver(i) nitrate tetrahydrate)		colorless	P41212	92	block	5.72	123	0.888	0.888				TEMP: at 123 K COLOR: colorless "HABIT: block
CUVTIX	R.K.Deshapande, J.L.Minnaar, S.G.Telfer	Angew.Chem.,Int.Ed.	2010	(C57 H51 N3 O19 Zn4)n,3n(C5 H11 N1 O1)	catena-((mu!4$-oxo)-tris(mu!4$-2-(t-butoxycarbonylamino)biphenyl-4,4'-dicarboxylato)-tetra-zinc N,N-diethylformamide solvate)		colorless	P-43m	215	block	11.59	292	0.54	0.53	The structure is disordered by symmetry. The SQUEEZE/PLATON program has been used to model the solvent molecules.	at 292 K		TEMP: at 292 K COLOR: colorless "HABIT: block
CUVTOD	R.K.Deshapande, J.L.Minnaar, S.G.Telfer	Angew.Chem.,Int.Ed.	2010	(C42 H27 N3 O13 Zn4)n,12n(C3 H7 N1 O1)	catena-((mu!4$-oxo)-tris(mu!4$-2-aminobiphenyl-4,4'-dicarboxylato)-tetra-zinc N,N-dimethylformamide solvate)		pale yellow	P-43m	215	block	9.61	173	0.625	0.625	The structure is disordered by symmetry. The SQUEEZE/PLATON program has been used to model the solvent molecules.			TEMP: at 173 K COLOR: pale yellow "HABIT: block
DABWUA	D.Lassig, J.Lincke, J.Moellmer, C.Reichenbach, A.Moeller, R.Glaser, G.Kalies, K.A.Cychosz, M.Thommes, R.Staudt, H.Krautscheid	Angew.Chem.,Int.Ed.	2011	(C32 H20 Cu2 N8 O8)n	catena-(bis(mu!4$-5-(3-Methyl-5-(4-pyridyl)-4H-1,2,4-triazol-4-yl)isophthalato)-di-copper(ii))		blue	P21/c	14	prism	5.3	293	0.928	0.928		at 293 K		TEMP: at 293 K COLOR: blue "HABIT: prism
DACSAE	Chengling Song, Yajing Ling, Liting Jin, Mingxing Zhang, De-Li Chen, Yabing He	Dalton Trans.	2016	(C22 H12 Cu2 N2 O11)n	catena-[(mu-4,4'-(2,1,3-benzoxadiazole-4,7-diyl)dibenzene-1,3-dicarboxylato)-diaqua-di-copper unknown solvate]		blue	R-3m	166	block	3.99	100	0.685	0.794	The structure is disordered.The SQUEEZE/PLATON program has been used to model some disorder.			TEMP: 100 K COLOR: blue "HABIT: block
DACSEI	Chengling Song, Yajing Ling, Liting Jin, Mingxing Zhang, De-Li Chen, Yabing He	Dalton Trans.	2016	(C22 H12 Cu2 N2 O10 Se1)n	catena-[(mu-4,4'-(2,1,3-benzoselenadiazole-4,7-diyl)dibenzene-1,3-dicarboxylato)-diaqua-di-copper unknown solvate]	ZJNU-42	blue	R-3m	166	block	15	100	0.866	0.86	The structure is disordered. The SQUEEZE/PLATON program has been used to model some disorder.			TEMP: 100 K COLOR: blue "HABIT: block
DANWAS	Qipu Lin, Tao Wu, Shou-Tian Zheng, Xianhui Bu, Pingyun Feng	J.Am.Chem.Soc.	2012	(C9 H4 N12 Zn1)n	catena-((mu!4$-Hydrogen 1,3,5-tris(2H-tetrazolato-5-yl)benzene)-zinc)		colorless	P42/mnm	136	block	3.72	296	0.695	0.695	H3B disordered by symmetry over two sites with occupancy 0.50.	at 296 K	50 percent void space in the structure	TEMP: at 296 K COLOR: colorless "HABIT: block
DANZID	Zhenjie Zhang, Linping Zhang, L.Wojtas, P.Nugent, M.Eddaoudi, M.J.Zaworotko	J.Am.Chem.Soc.	2012	(C60 H36 Cd2 Cl4 Cu4 O28 4-)n,n(C44 H36 Cu1 N8 4+)	catena-((5,10,15,20-tetrakis(N-Methylpyridinium-4-yl)porphyrinato)-copper tetrakis(mu!5$-biphenyl-3,4',5-tricarboxylato)-tetrakis(mu!2$-chloro)-tetra-aqua-di-cadmium-tetra-copper)		black	P4/n	85	rod	6.88	293	0.994	0.982	Cl4B and Cl4A disordered over two sites with occupancies 0.71:0.29; The SQUEEZE/PLATON program was used to model some disorder.	at 293 K	The paper describes some of the metal sites of the anion being mixed and also describes the terminal ligands as being methanol rather than aqua ligands, but this is not detailed in the crystallographic data	TEMP: at 293 K COLOR: black "HABIT: rod
DAWMUL	I.Eryazici, O.K.Farha, B.G.Hauser, A.O.Yazaydin, A.A.Sarjeant, S.T.Nguyen, J.T.Hupp	Cryst.Growth Des.	2012	(C288 H144 Cu12 O48)n	catena-[tetrakis(mu!12$-5',5'',5'''-(Benzene-1,3,5-triyltriethyne-2,1-diyl)tris(1,1':3',1''-terphenyl-4,4''-dicarboxylato))-dodeca-aqua-dodeca-copper(ii) unknown solvate]	NU-108-Cu	blue	Fm3m	225	block	7.27	225	0.266	0.266	Axial water molecules coordinated to the copper atoms and disordered solvent molecules could not be resolved from the diffraction data. Disordered solvent was modelled using the Olex2/mask procedure. The unit cell was found to contain a void of 224170 A$3! holding 66887 electrons.	twin		TEMP: at 225 K OTHER-DIFF: twin
DAWNAS	I.Eryazici, O.K.Farha, B.G.Hauser, A.O.Yazaydin, A.A.Sarjeant, S.T.Nguyen, J.T.Hupp	Cryst.Growth Des.	2012	(C72 H36 O13 Zn4)n	catena-[(mu!12$-5',5'',5'''-(Benzene-1,3,5-triyltriethyne-2,1-diyl)tris(1,1':3',1''-terphenyl-4,4''-dicarboxylato))-(mu!4$-oxo)-tetra-zinc(ii) unknown solvate]	NU-108-Zn	colorless	R-3c	167	plate	6.95	225	0.367	0.367	C3,C4,C6,C7 and C3A,C4A,C6A,C7A disordered over two sites with occupancies 0.550:0.450; O2,O3 and O4,O5 disordered over two sites with occupancies 0.536:0.464. The Zn4-O nodes of the framework are disordered by symmetry. Disordered solvent was modelled using the Olex2/mask procedure. The unit cell was found to contain a void of 29673 A$3! holding 11964 electrons.			TEMP: at 225.0 K COLOR: colorless "HABIT: plate
DELGEI	Cai-Xia Ding, Fan-Hua Zeng, Cheng Wang, Jia Ni, Seik-Weng Ng, Yong-Shu Xie	Gaodeng Xuexiao Huaxue Xuebao(Chin.)(Chem.J.Chin.Univ.(Chinese Edition))	2011	(C26 H20 Br2 Cd1 N6)n,7.5n(H2 O1)	catena-[(mu!4$-N,N,N',N'-tetrakis(Pyridin-4-yl)benzene-1,4-diamine)-dibromo-cadmium(ii)]			R-3m	166		8.42	100	0.934	0	The N,N,N',N'-tetra(pyridin-4-yl)benzene-1,4-diamine ligand is disordered. Solvent water has not been modelled from the diffraction data. We calculate 34% void space in the structure.
DEYVUA	Bo Liu, Yuanpu Li, Lei Hou, Guoping Yang, Yao-Yu Wang, Qi-Zhen Shi	J.Mater.Chem.A	2013	(C13 H7 N1 O4 Zn1)n	catena-((mu!5$-5-(3-Carboxyphenyl)nicotinic acid)-zinc unknown solvate)		colorless	P43212	96	polyhedral	7.36	296	0.961	0.961	We calculate 56% voids in the crystal structure, solvent molecules were not modelled and the disordered density was taken into account using the SQUEEZE/PLATON procedure.	at 296 K		TEMP: at 296 K COLOR: colorless "HABIT: polyhedral
DICKEH	Baishu Zheng, Ruirui Yun, Junfeng Bai, Zhiyong Lu, Liting Du, Yizhi Li	Inorg.Chem.	2013	(C26 H14 Cu2 O10)n	catena-[(mu!8$-5,5'-(1,4-Phenylenediethyne-2,1-diyl)diisophthalato)-diaqua-di-copper unknown solvate]		green	R-3m	166	block	3.67	291	0.555	0.555	Disordered solvent molecules were not modelled and the disordered density was taken into account using the SQUEEZE/PLATON procedure.	at 291 K		TEMP: at 291 K COLOR: green "HABIT: block
DIDBID	Ming-Hua Zeng, Yan-Xi Tan, Yan-Ping He, Zheng Yin, Qing Chen, M.Kurmoo	Inorg.Chem.	2013	(C24 H16 Co1 N2 O4)n	catena-[bis(mu!2$-4-(Pyridin-4-yl)benzoato)-cobalt(ii)]			P4212	90		5.37	353	0.925	0.925				TEMP: at 353 K
DIDDOK	M.Kondo, Y.Irie, M.Miyazawa, H.Kawaguchi, S.Yasue, K.Maeda, F.Uchida	J.Organomet.Chem.	2007	(C40 H26 N2 O10 Zn2)n,4n(H2 O1),2n(C3 H7 N1 O1)	catena-[bis(mu!4$-4,4'-Oxybis(benzoato))-(mu!2$-trans-1,2-bis(4-pyridyl)ethylene)-bis(dimethylformamide)-di-zinc bis(dimethylformamide) clathrate tetrahydrate]		colorless	C2/c	15	prism	8.67	253	0.665	0.666				TEMP: at 253.2 K COLOR: colorless "HABIT: prism
DIMQEX	Lei Han, Lan-Ping Xu, Lan Qin, Wen-Na Zhao, Xiao-Zhi Yan, Lei Yu	Cryst.Growth Des.	2013	(C58 H28 F12 N4 O12 Zn2)n	catena-[bis(mu!4$-4,4'-(1,1,1,3,3,3-Hexafluoropropane-2,2-diyl)dibenzoato)-(mu!2$- 2,7-di(pyridin-4-yl)benzo[lmn][3,8]phenanthroline-1,3,6,8(2H,7H)-tetrone)-di-zinc(ii) unknown solvate]		yellow	Pbcn	60	block	9.47	298	0.785	0.785	Disordered solvent molecules were not modelled and the disordered density was taken into account using the SQUEEZE/PLATON procedure.	at 298 K		TEMP: at 298 K COLOR: yellow "HABIT: block
DIRPOL	Myung-Ho Choi, Hye Jeong Park, Dae Ho Hong, Myunghyun Paik Suh	Chem.-Eur.J.	2013	(C66 H36 N2 O13 Zn4)n	catena-[bis(mu!6$-6,6',6''-Nitrilotri-2-naphthoato)-(mu!4$-oxo)-tetra-zinc]	SNU-150'	green	Pa-3	205	prism	7.71	120	0.865	0.865	The SQUEEZE/PLATON program has been used to model some disorder. The unit cell was found to contain a void of 11438 A$3! holding 6116 electrons.		We calculate 56% void space in the structure. The solvent-free framework was produced via activation using supercritical CO2 fluid	TEMP: at 120 K COLOR: green "HABIT: prism
DITJIB	Muwei Zhang, Ying-Pin Chen, M.Bosch, T.Gentle III, Kecheng Wang, Dawei Feng, Z.U.Wang, Hong-Cai Zhou	Angew.Chem.,Int.Ed.	2014	(C53 H32 Hf3 O16)n	catena-[(mu!8$-4',4'',4''',4''''-Methanetetrayltetrabiphenyl-4-carboxylato)-tetrakis(mu!3$-oxo)-tetraoxo-tri-hafnium unknown solvate]			I4/m	87	Distorted Octahedron	7.77	110	0.545	0.545	Disordered solvent molecules were not modelled and the disordered density was taken into account using the SQUEEZE/PLATON procedure.			TEMP: at 110 K HABIT: Distorted Octahedron
DITJOH	Muwei Zhang, Ying-Pin Chen, M.Bosch, T.Gentle III, Kecheng Wang, Dawei Feng, Z.U.Wang, Hong-Cai Zhou	Angew.Chem.,Int.Ed.	2014	(C53 H32 O16 Zr3)n	catena-[(mu!8$-4',4'',4''',4''''-Methanetetrayltetrabiphenyl-4-carboxylato)-tetrakis(mu!3$-oxo)-tetraoxo-tri-zirconium unknown solvate]			I4/m	87	octahedron	10.02	110	0.474	0.474	Disordered solvent molecules were not modelled and the disordered density was taken into account using the SQUEEZE/PLATON procedure.			TEMP: at 110 K HABIT: octahedron
DIXFAT	Yan-Xi Tan, Yan-Ping He, Jian Zhang	Chem.Commun.	2014	(C80 H34 N1 O57 S13 Zn17)n	catena-[nonakis(mu!4$-thiophene-2,5-dicarboxylato)-tetrakis(mu!4$-oxido)-tetrakis(mu!3$-thiophene-2,5-dicarboxylato)-aqua-(dimethylamino)-heptadeca-zinc]		colorless	I4/mmm	139	Prism	9.39	293	0.845	0.864	The structure is disordered.	at 293 K		TEMP: at 293 K COLOR: colorless "HABIT: Prism
DODBUV	Hai-Long Jiang, Dawei Feng, Kecheng Wang, Zhi-Yuan Gu, Zhangwen Wei, Ying-Pin Chen, Hong-Cai Zhou	J.Am.Chem.Soc.	2013	(C48 H34 N4 O16 Zr3)n	catena-[(mu!8$-4,4',4'',4'''-porphyrin-5,10,15,20-tetrayltetrabenzoato)-bis(mu!3$-hydroxy)-bis(mu!3$-oxido)-diaqua-bis(hydroxy)-tri-zirconium unknown solvate]			I41/amd	141		5.57	110	0.738	0.733	Disordered solvent molecules were not modelled and the disordered density was taken into account using the SQUEEZE/PLATON procedure.			TEMP: at 110 K
DODGOU	N.A.Vermeulen, O.Karagiaridi, A.A.Sarjeant, C.L.Stern, J.T.Hupp, O.K.Farha, J.Fraser Stoddart	J.Am.Chem.Soc.	2013	(C58 H36 Br2 N2 O8 Zn2)n	catena-((mu-4,4'-(2,5-divinyl-1,4-phenylene)-bis(3-vinylpyridine))-(mu-4,4',4'',4'''-(3,6-dibromobenzene-1,2,4,5-tetrayl)tetrabenzoato)-di-zinc unknown solvate)	SALEM-14	yellow	Pmmm	47	plate	11.89	100	0.636	0.636	The structure is disordered; The MASK/OLEX2 program has been used to model some disorder.			TEMP: 100.0 K COLOR: yellow "HABIT: plate
DODGUA	N.A.Vermeulen, O.Karagiaridi, A.A.Sarjeant, C.L.Stern, J.T.Hupp, O.K.Farha, J.Fraser Stoddart	J.Am.Chem.Soc.	2013	(C54 H32 Br2 N2 O8 Zn2)n	catena-((mu-4,4'-(2,5-divinyl-1,4-phenylene)-bis(pyridine))-(mu-4,4',4'',4'''-(3,6-dibromobenzene-1,2,4,5-tetrayl)tetrabenzoato)-di-zinc unknown solvate)	SALEM-13	colorless	Pmmm	47	lath	11.45	100	0.595	0.594	The structure is disordered; The MASK/OLEX2 program has been used to model some disorder.			TEMP: 100.0 K COLOR: colorless "HABIT: lath
DOFTID	A.M.Bohnsack, I.A.Ibarra, V.I.Bakhmutov, V.M.Lynch, S.M.Humphrey	J.Am.Chem.Soc.	2013	(C34 H24 Cl2 O10 P2 Pt1 Zn2)n	catena-[(mu-4,4',4'',4'''-(Benzene-1,2-diyldiphosphanetriyl)tetrabenzoato)-diaqua-dichloro-platinum-di-zinc unknown solvate]	Pt-PCM-18	colorless	Imma	74	Prismatic Rod	5.88	120	0.708	0.707	C10,C8,C9,Cl1,Pt1 disordered by symmetry over two configurations with occupancy 0.50. Disordered solvent molecules were not modelled and the disordered density was taken into account using the SQUEEZE/PLATON procedure.			TEMP: 120 K COLOR: colorless "HABIT: Prismatic Rod
DOFTOJ	A.M.Bohnsack, I.A.Ibarra, V.I.Bakhmutov, V.M.Lynch, S.M.Humphrey	J.Am.Chem.Soc.	2013	(C34 H24 Cl2 O10 P2 Pd1 Zn2)n	catena-[(mu-4,4',4'',4'''-(Benzene-1,2-diyldiphosphanetriyl)tetrabenzoato)-diaqua-dichloro-palladium-di-zinc unknown solvate]		colorless	Imma	74	Prism	10.82	100	0.7	0.7	C10,C8,C9,Cl1,Pd1 disordered by symmetry over two configurations with occupancy 0.50. Disordered solvent molecules were not modelled and the disordered density was taken into account using the SQUEEZE/PLATON procedure.			TEMP: 100 K COLOR: colorless "HABIT: Prism
DOGBAE	Dawei Feng, Wan-Chun Chung, Zhangwen Wei, Zhi-Yuan Gu, Hai-Long Jiang, Ying-Pin Chen, D.J.Darensbourg, Hong-Cai Zhou	J.Am.Chem.Soc.	2013	(C144 H116 N12 O64 Zr15)n	catena-[tris(mu!9$-4,4',4'',4'''-(22,24-Dihydroporphyrin-5,10,15,20-tetrayl)tetrabenzoato)-hexadecakis(mu!3$-hydroxo)-tetra-aqua-icosahydroxo-pentadeca-zirconium unknown solvate]	PCN-224(Zr)	purple	Im-3m	229	cubic	17.29	110	0.514	0.509	The structure is disordered. Disordered solvent molecules were not modelled and the disordered density was taken into account using the SQUEEZE/PLATON procedure.		Structure does not appear to be reported in the paper. We calculate 79% void space in the structure	TEMP: 110 K COLOR: purple "HABIT: cubic
DOJXOR	Yun Gong, Miao Miao Zhang, Pan Zhang, Hui Fang Shi, Peng Gang Jiang, Jian Hua Lin	CrystEngComm	2014	(C52 H34 Cu2 N6 O9)n,2(H2 O1)	catena-[(mu!4$-terephthalato)-bis(mu!3$- 4-(4,2':6',4''-terpyridin-4'-yl)benzoato)-aqua-di-copper unknown solvate dihydrate]			C2/c	15		8.11	298	0.952	0.952	C23,C24,O4 and C23',C24',O4' disordered over two sites with occupancies 0.685:0.315; C25,C26 and C25',C26' disordered over two sites with occupancies 0.685:0.315. Disordered solvent molecules were not modelled and the disordered density was taken into account using the SQUEEZE/PLATON procedure.	at 298 K		TEMP: at 298 K
DOKDEN	S.Horike, S.Hasegawa, D.Tanaka, M.Higuchi, S.Kitagawa	Chem.Commun.	2008	(C16 H13 Cu1 N1 O4)n,n(H2 O1)	catena-((mu!5$-bis(4-carboxylatobenzyl)amine)-copper(ii) monohydrate)		blue	R-3	148	prism	8.3	223	0.749	0.745			41% void space in the structure	TEMP: at 223.1 K COLOR: blue "HABIT: prism
DOLWEI	Yunling Liu	CSD Communication(Private Communication)	2014	(C14 H12 Co1 N2 O5 S1)n	catena-[(mu!3$-2,2'-Bipyridine-5,5'-dicarboxylato)-(dimethyl sulfoxide)-cobalt]		red	Pa-3	205	block	8.85	293	0.996	0	C13,C14 and C13',C14' disordered over two sites with occupancies 0.50:0.50; O1,O2 and O1',O2' disordered over two sites with occupancies 0.50:0.50.	293 K	We calculate 46% void space in the structure	TEMP: 293 K COLOR: red "HABIT: block
DOMCUE	N.Roques, D.Maspoch, I.Imaz, A.Datcu, J.-P.Sutter, C.Rovira, J.Veciana	Chem.Commun.	2008	(C31 H21 Cl12 N3 O9 Tb1)n,n(C3 H7 N1 O1)	catena-((mu!4$-1,1',1''-Methanetris(2,3,5,6-tetrachlorophenyl-4-carboxylato) radical-O,O',O'',O''',O'''')-tris(dimethylformamide-O)-terbium(iii) dimethyl formamide clathrate)		red	I41/a	88	octahedra	4.35	150	0.898	0	Dimethylformamide guest molecules in the pores of the structure are disordered and could not be identified.	synchrotron radiation	The secondary building units create large pore sizes containing disordered clathrated solvent molecules; there is 48% void space in the structure. The structure exhibits reversible DMF sorption	TEMP: at 150 K RADIATION: synchrotron radiation "OTHER-EXP: magnetic properties
DOMDAL	N.Roques, D.Maspoch, I.Imaz, A.Datcu, J.-P.Sutter, C.Rovira, J.Veciana	Chem.Commun.	2008	(C28 H17 Cl12 N2 O9 Tb1)n	catena-((mu!4$-1,1',1''-Methanetris(2,3,5,6-tetrachlorophenyl-4-carboxylato)-O,O',O'',O''',O'''')-aqua-bis(dimethylformamide)-terbium(iii))		colorless	I41/a	88	octahedra	7.78	150	0.778	0.776	Carboxylate moieties show high disorder which is not modelled.	synchrotron radiation	There is 54% void space in the structure. No information is given regarding the filling of the void space with guest solvent molecules as occurs in the analogous structure which has the radical bridging ligand	TEMP: at 150 K RADIATION: synchrotron radiation
DORLAZ	K.Manna, Teng Zhang, M.Carboni, C.W.Abney, Wenbin Lin	J.Am.Chem.Soc.	2014	(C81 H53 N3 O19 Zr3)n	catena-(tris(mu!4$-2'-(Salicylideneamino)-1,1':4',1''-terphenyl-4,4''-dicarboxylato)-bis(mu!3$-hydroxo)-bis(mu!3$-oxo)-tri-zirconium)			Fm3m	225		7.71	100	0.63	0.493	The authors state that due to disorder it was not possible to model the salicylideneamine sidechains.		We have assigned hydrogens to the hydroxo groups arbitrarily	TEMP: at 100 K
DORNAB	Xing Duan	CSD Communication(Private Communication)	2014	(C144 H84 Cu12 N4 O60)n	catena-[tetrakis(mu-5,5',5''-(9H-carbazole-3,6,9-triyl)triisophthalato)-dodeca-aqua-dodeca-copper unknown solvate]	ZJU-70	green	Cmc21	36	block	9.33	293	0.876	0.876	The SQUEEZE/PLATON program has been used to model some disorder.	293 K		COLOR: green HABIT: block "SOURCE-CHEM: N,N-dimethylformamide/water/EtCN "SENS: acid-sensitive
DOTSOV	Yue Wu, A.Kobayashi, G.J.Halder, V.K.Peterson, K.W.Chapman, N.Lock, P.D.Southon, C.J.Kepert	Angew.Chem.,Int.Ed.	2008	(C36 H12 Cu6 O24)n	catena-(tetrakis(mu!6$-1,3,5-Benzenetricarboxylato)-hexa-copper)		dark blue	Fm-3m	225	octahedron	5.87	100	0.885	0.885				TEMP: at 100K COLOR: dark blue "HABIT: octahedron
DOTSOV01	Yue Wu, A.Kobayashi, G.J.Halder, V.K.Peterson, K.W.Chapman, N.Lock, P.D.Southon, C.J.Kepert	Angew.Chem.,Int.Ed.	2008	(C36 H12 Cu6 O24)n	catena-(tetrakis(mu!6$-1,3,5-Benzenetricarboxylato)-hexa-copper)		dark blue	Fm-3m	225	octahedron	7.94	295	0.887	0.887		at 295K		TEMP: at 295K COLOR: dark blue "HABIT: octahedron
DOTSOV02	Yue Wu, A.Kobayashi, G.J.Halder, V.K.Peterson, K.W.Chapman, N.Lock, P.D.Southon, C.J.Kepert	Angew.Chem.,Int.Ed.	2008	(C36 H12 Cu6 O24)n	catena-(tetrakis(mu!6$-1,3,5-Benzenetricarboxylato)-hexa-copper)		dark blue	Fm-3m	225	octahedron	7.96	276	0.887	0.887				TEMP: at 276K COLOR: dark blue "HABIT: octahedron
DOTSOV03	Yue Wu, A.Kobayashi, G.J.Halder, V.K.Peterson, K.W.Chapman, N.Lock, P.D.Southon, C.J.Kepert	Angew.Chem.,Int.Ed.	2008	(C36 H12 Cu6 O24)n	catena-(tetrakis(mu!6$-1,3,5-Benzenetricarboxylato)-hexa-copper)		dark blue	Fm-3m	225	octahedron	7.78	260	0.887	0.887				TEMP: at 260K COLOR: dark blue "HABIT: octahedron
DOTSOV04	Yue Wu, A.Kobayashi, G.J.Halder, V.K.Peterson, K.W.Chapman, N.Lock, P.D.Southon, C.J.Kepert	Angew.Chem.,Int.Ed.	2008	(C36 H12 Cu6 O24)n	catena-(tetrakis(mu!6$-1,3,5-Benzenetricarboxylato)-hexa-copper)		dark blue	Fm-3m	225	octahedron	7.34	244	0.887	0.887				TEMP: at 244K COLOR: dark blue "HABIT: octahedron
DOTSOV05	Yue Wu, A.Kobayashi, G.J.Halder, V.K.Peterson, K.W.Chapman, N.Lock, P.D.Southon, C.J.Kepert	Angew.Chem.,Int.Ed.	2008	(C36 H12 Cu6 O24)n	catena-(tetrakis(mu!6$-1,3,5-Benzenetricarboxylato)-hexa-copper)		dark blue	Fm-3m	225	octahedron	7.22	228	0.887	0.887				TEMP: at 228K COLOR: dark blue "HABIT: octahedron
DOTSOV06	Yue Wu, A.Kobayashi, G.J.Halder, V.K.Peterson, K.W.Chapman, N.Lock, P.D.Southon, C.J.Kepert	Angew.Chem.,Int.Ed.	2008	(C36 H12 Cu6 O24)n	catena-(tetrakis(mu!6$-1,3,5-Benzenetricarboxylato)-hexa-copper)		dark blue	Fm-3m	225	octahedron	7.02	212	0.886	0.886				TEMP: at 212K COLOR: dark blue "HABIT: octahedron
DOTSOV07	Yue Wu, A.Kobayashi, G.J.Halder, V.K.Peterson, K.W.Chapman, N.Lock, P.D.Southon, C.J.Kepert	Angew.Chem.,Int.Ed.	2008	(C36 H12 Cu6 O24)n	catena-(tetrakis(mu!6$-1,3,5-Benzenetricarboxylato)-hexa-copper)		dark blue	Fm-3m	225	octahedron	6.86	196	0.886	0.886				TEMP: at 196K COLOR: dark blue "HABIT: octahedron
DOTSOV08	Yue Wu, A.Kobayashi, G.J.Halder, V.K.Peterson, K.W.Chapman, N.Lock, P.D.Southon, C.J.Kepert	Angew.Chem.,Int.Ed.	2008	(C36 H12 Cu6 O24)n	catena-(tetrakis(mu!6$-1,3,5-Benzenetricarboxylato)-hexa-copper)		dark blue	Fm-3m	225	octahedron	6.51	180	0.886	0.886				TEMP: at 180 K COLOR: dark blue "HABIT: octahedron
DOTSOV09	Yue Wu, A.Kobayashi, G.J.Halder, V.K.Peterson, K.W.Chapman, N.Lock, P.D.Southon, C.J.Kepert	Angew.Chem.,Int.Ed.	2008	(C36 H12 Cu6 O24)n	catena-(tetrakis(mu!6$-1,3,5-Benzenetricarboxylato)-hexa-copper)		dark blue	Fm-3m	225	octahedron	6.27	164	0.886	0.886				TEMP: at 164 K COLOR: dark blue "HABIT: octahedron
DOTSOV10	Yue Wu, A.Kobayashi, G.J.Halder, V.K.Peterson, K.W.Chapman, N.Lock, P.D.Southon, C.J.Kepert	Angew.Chem.,Int.Ed.	2008	(C36 H12 Cu6 O24)n	catena-(tetrakis(mu!6$-1,3,5-Benzenetricarboxylato)-hexa-copper)		dark blue	Fm-3m	225	octahedron	6.19	148	0.886	0.886				TEMP: at 148K COLOR: dark blue "HABIT: octahedron
DOTSOV11	Yue Wu, A.Kobayashi, G.J.Halder, V.K.Peterson, K.W.Chapman, N.Lock, P.D.Southon, C.J.Kepert	Angew.Chem.,Int.Ed.	2008	(C36 H12 Cu6 O24)n	catena-(tetrakis(mu!6$-1,3,5-Benzenetricarboxylato)-hexa-copper)		dark blue	Fm-3m	225	octahedron	5.93	132	0.886	0.886				TEMP: at 132K COLOR: dark blue "HABIT: octahedron
DOTSOV12	Yue Wu, A.Kobayashi, G.J.Halder, V.K.Peterson, K.W.Chapman, N.Lock, P.D.Southon, C.J.Kepert	Angew.Chem.,Int.Ed.	2008	(C36 H12 Cu6 O24)n	catena-(tetrakis(mu!6$-1,3,5-Benzenetricarboxylato)-hexa-copper)		dark blue	Fm-3m	225	octahedron	5.7	116	0.885	0.885				TEMP: at 116K COLOR: dark blue "HABIT: octahedron
DOTSOV13	Yue Wu, A.Kobayashi, G.J.Halder, V.K.Peterson, K.W.Chapman, N.Lock, P.D.Southon, C.J.Kepert	Angew.Chem.,Int.Ed.	2008	(C36 H12 Cu6 O24)n	catena-(tetrakis(mu!6$-1,3,5-Benzenetricarboxylato)-hexa-copper)		dark blue	Fm-3m	225	octahedron	5.75	100	0.885	0.885				TEMP: at 100K COLOR: dark blue "HABIT: octahedron
DOTSOV14	Yue Wu, A.Kobayashi, G.J.Halder, V.K.Peterson, K.W.Chapman, N.Lock, P.D.Southon, C.J.Kepert	Angew.Chem.,Int.Ed.	2008	(C36 H12 Cu6 O24)n	catena-(tetrakis(mu!6$-1,3,5-Benzenetricarboxylato)-hexa-copper)		dark blue	Fm-3m	225	octahedron	5.85	116	0.885	0.885				TEMP: at 116K COLOR: dark blue "HABIT: octahedron
DOTSOV15	Yue Wu, A.Kobayashi, G.J.Halder, V.K.Peterson, K.W.Chapman, N.Lock, P.D.Southon, C.J.Kepert	Angew.Chem.,Int.Ed.	2008	(C36 H12 Cu6 O24)n	catena-(tetrakis(mu!6$-1,3,5-Benzenetricarboxylato)-hexa-copper)		dark blue	Fm-3m	225	octahedron	6.01	132	0.885	0.885				TEMP: at 132 K COLOR: dark blue "HABIT: octahedron
DOTSOV16	Yue Wu, A.Kobayashi, G.J.Halder, V.K.Peterson, K.W.Chapman, N.Lock, P.D.Southon, C.J.Kepert	Angew.Chem.,Int.Ed.	2008	(C36 H12 Cu6 O24)n	catena-(tetrakis(mu!6$-1,3,5-Benzenetricarboxylato)-hexa-copper)		dark blue	Fm-3m	225	octahedron	6.27	148	0.885	0.885				TEMP: at 148 K COLOR: dark blue "HABIT: octahedron
DOTSOV17	Yue Wu, A.Kobayashi, G.J.Halder, V.K.Peterson, K.W.Chapman, N.Lock, P.D.Southon, C.J.Kepert	Angew.Chem.,Int.Ed.	2008	(C36 H12 Cu6 O24)n	catena-(tetrakis(mu!6$-1,3,5-Benzenetricarboxylato)-hexa-copper)		dark blue	Fm-3m	225	octahedron	6.41	164	0.886	0.885				TEMP: at 164K COLOR: dark blue "HABIT: octahedron
DOTSOV18	Yue Wu, A.Kobayashi, G.J.Halder, V.K.Peterson, K.W.Chapman, N.Lock, P.D.Southon, C.J.Kepert	Angew.Chem.,Int.Ed.	2008	(C36 H12 Cu6 O24)n	catena-(tetrakis(mu!6$-1,3,5-Benzenetricarboxylato)-hexa-copper)		dark blue	Fm-3m	225	octahedron	6.43	180	0.886	0.886				TEMP: at 180 K COLOR: dark blue "HABIT: octahedron
DOTSOV19	Yue Wu, A.Kobayashi, G.J.Halder, V.K.Peterson, K.W.Chapman, N.Lock, P.D.Southon, C.J.Kepert	Angew.Chem.,Int.Ed.	2008	(C36 H12 Cu6 O24)n	catena-(tetrakis(mu!6$-1,3,5-Benzenetricarboxylato)-hexa-copper)		dark blue	Fm-3m	225	octahedron	6.76	196	0.886	0.886				TEMP: at 196 K COLOR: dark blue "HABIT: octahedron
DOTSOV20	Yue Wu, A.Kobayashi, G.J.Halder, V.K.Peterson, K.W.Chapman, N.Lock, P.D.Southon, C.J.Kepert	Angew.Chem.,Int.Ed.	2008	(C36 H12 Cu6 O24)n	catena-(tetrakis(mu!6$-1,3,5-Benzenetricarboxylato)-hexa-copper)		dark blue	Fm-3m	225	octahedron	7.43	212	0.886	0.886				TEMP: at 212 K COLOR: dark blue "HABIT: octahedron
DOTSOV21	Yue Wu, A.Kobayashi, G.J.Halder, V.K.Peterson, K.W.Chapman, N.Lock, P.D.Southon, C.J.Kepert	Angew.Chem.,Int.Ed.	2008	(C36 H12 Cu6 O24)n	catena-(tetrakis(mu!6$-1,3,5-Benzenetricarboxylato)-hexa-copper)		dark blue	Fm-3m	225	octahedron	7.1	228	0.886	0.886				TEMP: at 228 K COLOR: dark blue "HABIT: octahedron
DOTSOV22	Yue Wu, A.Kobayashi, G.J.Halder, V.K.Peterson, K.W.Chapman, N.Lock, P.D.Southon, C.J.Kepert	Angew.Chem.,Int.Ed.	2008	(C36 H12 Cu6 O24)n	catena-(tetrakis(mu!6$-1,3,5-Benzenetricarboxylato)-hexa-copper)		dark blue	Fm-3m	225	octahedron	7.38	244	0.886	0.886				TEMP: at 244 K COLOR: dark blue "HABIT: octahedron
DOTSOV23	Yue Wu, A.Kobayashi, G.J.Halder, V.K.Peterson, K.W.Chapman, N.Lock, P.D.Southon, C.J.Kepert	Angew.Chem.,Int.Ed.	2008	(C36 H12 Cu6 O24)n	catena-(tetrakis(mu!6$-1,3,5-Benzenetricarboxylato)-hexa-copper)		dark blue	Fm-3m	225	octahedron	7.53	260	0.886	0.886				TEMP: at 260K COLOR: dark blue "HABIT: octahedron
DOTSOV24	Yue Wu, A.Kobayashi, G.J.Halder, V.K.Peterson, K.W.Chapman, N.Lock, P.D.Southon, C.J.Kepert	Angew.Chem.,Int.Ed.	2008	(C36 H12 Cu6 O24)n	catena-(tetrakis(mu!6$-1,3,5-Benzenetricarboxylato)-hexa-copper)		dark blue	Fm-3m	225	octahedron	7.91	276	0.887	0.887				TEMP: at 276 K COLOR: dark blue "HABIT: octahedron
DOTSOV25	Yue Wu, A.Kobayashi, G.J.Halder, V.K.Peterson, K.W.Chapman, N.Lock, P.D.Southon, C.J.Kepert	Angew.Chem.,Int.Ed.	2008	(C36 H12 Cu6 O24)n	catena-(tetrakis(mu!6$-1,3,5-Benzenetricarboxylato)-hexa-copper)		dark blue	Fm-3m	225	octahedron	8.15	308	0.887	0.887				TEMP: at 308 K COLOR: dark blue "HABIT: octahedron
DOTSOV26	Yue Wu, A.Kobayashi, G.J.Halder, V.K.Peterson, K.W.Chapman, N.Lock, P.D.Southon, C.J.Kepert	Angew.Chem.,Int.Ed.	2008	(C36 H12 Cu6 O24)n	catena-(tetrakis(mu!6$-1,3,5-Benzenetricarboxylato)-hexa-copper)		dark blue	Fm-3m	225	octahedron	8.58	324	0.887	0.887				TEMP: at 324 K COLOR: dark blue "HABIT: octahedron
DOTSOV27	Yue Wu, A.Kobayashi, G.J.Halder, V.K.Peterson, K.W.Chapman, N.Lock, P.D.Southon, C.J.Kepert	Angew.Chem.,Int.Ed.	2008	(C36 H12 Cu6 O24)n	catena-(tetrakis(mu!6$-1,3,5-Benzenetricarboxylato)-hexa-copper)		dark blue	Fm-3m	225	octahedron	8.77	340	0.887	0.887				TEMP: at 340 K COLOR: dark blue "HABIT: octahedron
DOTSOV28	Yue Wu, A.Kobayashi, G.J.Halder, V.K.Peterson, K.W.Chapman, N.Lock, P.D.Southon, C.J.Kepert	Angew.Chem.,Int.Ed.	2008	(C36 H12 Cu6 O24)n	catena-(tetrakis(mu!6$-1,3,5-Benzenetricarboxylato)-hexa-copper)		dark blue	Fm-3m	225	octahedron	8.39	356	0.887	0.887				TEMP: at 356 K COLOR: dark blue "HABIT: octahedron
DOTSOV29	Yue Wu, A.Kobayashi, G.J.Halder, V.K.Peterson, K.W.Chapman, N.Lock, P.D.Southon, C.J.Kepert	Angew.Chem.,Int.Ed.	2008	(C36 H12 Cu6 O24)n	catena-(tetrakis(mu!6$-1,3,5-Benzenetricarboxylato)-hexa-copper)		dark blue	Fm-3m	225	octahedron	9.47	372	0.886	0.886				TEMP: at 372K COLOR: dark blue "HABIT: octahedron
DOTSOV30	Yue Wu, A.Kobayashi, G.J.Halder, V.K.Peterson, K.W.Chapman, N.Lock, P.D.Southon, C.J.Kepert	Angew.Chem.,Int.Ed.	2008	(C36 H12 Cu6 O24)n	catena-(tetrakis(mu!6$-1,3,5-Benzenetricarboxylato)-hexa-copper)		dark blue	Fm-3m	225	octahedron	9.49	388	0.888	0.888				TEMP: at 388K COLOR: dark blue "HABIT: octahedron
DOTSOV31	Yue Wu, A.Kobayashi, G.J.Halder, V.K.Peterson, K.W.Chapman, N.Lock, P.D.Southon, C.J.Kepert	Angew.Chem.,Int.Ed.	2008	(C36 H12 Cu6 O24)n	catena-(tetrakis(mu!6$-1,3,5-Benzenetricarboxylato)-hexa-copper)		dark blue	Fm-3m	225	octahedron	9.96	404	0.888	0.888				TEMP: at 404K COLOR: dark blue "HABIT: octahedron
DOTSOV32	Yue Wu, A.Kobayashi, G.J.Halder, V.K.Peterson, K.W.Chapman, N.Lock, P.D.Southon, C.J.Kepert	Angew.Chem.,Int.Ed.	2008	(C36 H12 Cu6 O24)n	catena-(tetrakis(mu!6$-1,3,5-Benzenetricarboxylato)-hexa-copper)		dark blue	Fm-3m	225	octahedron	5.68	452	0.889	0.889				TEMP: at 452K COLOR: dark blue "HABIT: octahedron
DOTSOV33	Yue Wu, A.Kobayashi, G.J.Halder, V.K.Peterson, K.W.Chapman, N.Lock, P.D.Southon, C.J.Kepert	Angew.Chem.,Int.Ed.	2008	(C36 H12 Cu6 O24)n	catena-(tetrakis(mu!6$-1,3,5-Benzenetricarboxylato)-hexa-copper)		dark blue	Fm-3m	225	octahedron	5.71	468	0.889	0.889				TEMP: at 468K COLOR: dark blue "HABIT: octahedron
DOTSOV34	Yue Wu, A.Kobayashi, G.J.Halder, V.K.Peterson, K.W.Chapman, N.Lock, P.D.Southon, C.J.Kepert	Angew.Chem.,Int.Ed.	2008	(C36 H12 Cu6 O24)n	catena-(tetrakis(mu!6$-1,3,5-Benzenetricarboxylato)-hexa-copper)		dark blue	Fm-3m	225	octahedron	6.46	484	0.89	0.89				TEMP: at 484K COLOR: dark blue "HABIT: octahedron
DOTSOV35	Yue Wu, A.Kobayashi, G.J.Halder, V.K.Peterson, K.W.Chapman, N.Lock, P.D.Southon, C.J.Kepert	Angew.Chem.,Int.Ed.	2008	(C36 H12 Cu6 O24)n	catena-(tetrakis(mu!6$-1,3,5-Benzenetricarboxylato)-hexa-copper)		dark blue	Fm-3m	225	octahedron	7.65	500	0.889	0.889				TEMP: at 500K COLOR: dark blue "HABIT: octahedron
DOTSOV36	Yue Wu, A.Kobayashi, G.J.Halder, V.K.Peterson, K.W.Chapman, N.Lock, P.D.Southon, C.J.Kepert	Angew.Chem.,Int.Ed.	2008	(C36 H12 Cu6 O24)n	catena-(tetrakis(mu!6$-1,3,5-Benzenetricarboxylato)-hexa-copper)		dark blue	Fm-3m	225	octahedron	9.33	484	0.889	0.889				TEMP: at 484K COLOR: dark blue "HABIT: octahedron
DOTSOV37	Yue Wu, A.Kobayashi, G.J.Halder, V.K.Peterson, K.W.Chapman, N.Lock, P.D.Southon, C.J.Kepert	Angew.Chem.,Int.Ed.	2008	(C36 H12 Cu6 O24)n	catena-(tetrakis(mu!6$-1,3,5-Benzenetricarboxylato)-hexa-copper)		dark blue	Fm-3m	225	octahedron	9.59	468	0.889	0.889				TEMP: at 468 K COLOR: dark blue "HABIT: octahedron
DOTSOV38	Yue Wu, A.Kobayashi, G.J.Halder, V.K.Peterson, K.W.Chapman, N.Lock, P.D.Southon, C.J.Kepert	Angew.Chem.,Int.Ed.	2008	(C36 H12 Cu6 O24)n	catena-(tetrakis(mu!6$-1,3,5-Benzenetricarboxylato)-hexa-copper)		dark blue	Fm-3m	225	octahedron	9.47	452	0.889	0.889				TEMP: at 452 K COLOR: dark blue "HABIT: octahedron
DOTSOV39	Yue Wu, A.Kobayashi, G.J.Halder, V.K.Peterson, K.W.Chapman, N.Lock, P.D.Southon, C.J.Kepert	Angew.Chem.,Int.Ed.	2008	(C36 H12 Cu6 O24)n	catena-(tetrakis(mu!6$-1,3,5-Benzenetricarboxylato)-hexa-copper)		dark blue	Fm-3m	225	octahedron	9.78	436	0.889	0.889				TEMP: at 436K COLOR: dark blue "HABIT: octahedron
DOTSOV40	Yue Wu, A.Kobayashi, G.J.Halder, V.K.Peterson, K.W.Chapman, N.Lock, P.D.Southon, C.J.Kepert	Angew.Chem.,Int.Ed.	2008	(C36 H12 Cu6 O24)n	catena-(tetrakis(mu!6$-1,3,5-Benzenetricarboxylato)-hexa-copper)		dark blue	Fm-3m	225	octahedron	9.29	420	0.889	0.889				TEMP: at 420K COLOR: dark blue "HABIT: octahedron
DOTSOV41	Yue Wu, A.Kobayashi, G.J.Halder, V.K.Peterson, K.W.Chapman, N.Lock, P.D.Southon, C.J.Kepert	Angew.Chem.,Int.Ed.	2008	(C36 H12 Cu6 O24)n	catena-(tetrakis(mu!6$-1,3,5-Benzenetricarboxylato)-hexa-copper)		dark blue	Fm-3m	225	octahedron	8.95	404	0.889	0.889				TEMP: at 404K COLOR: dark blue "HABIT: octahedron
DOTSOV43	V.K.Peterson, P.D.Southon, G.J.Halder, D.J.Price, J.J.Bevitt, C.J.Kepert	Chem.Mater.	2014	(C18 H6 Cu3 O12)n	catena-(bis(mu!6$-1,3,5-Benzenetricarboxylato)-tri-copper)		blue	Fm-3m	225	octahedron	2.4	273	0.886	0.886			Structure contains a large amount of void space	TEMP: at 273 K COLOR: blue "HABIT: octahedron
DOYHIK	Xiuyan Wan, Feilong Jiang, Lian Chen, Mingyan Wu, Mingjian Zhang, Jie Pan, Kongzhao Su, Yan Yang, Maochun Hong	Cryst.Growth Des.	2015	(C96 H38 O48 Zn7)n	catena-[tetrakis(mu-1,1':4',1''-terphenyl-2',3,3'',5,5',5''-hexacarboxylato)-hepta-zinc unknown solvate]		colorless	P-1	2	prism	5.33	100	0.955	0.955	The SQUEEZE/PLATON program has been used to model some disorder.			TEMP: at 100 K COLOR: colorless "HABIT: prism
DUDCEK01	T.O.Vardosanidze, V.I.Sokol, A.N.Sobolev, A.E.Shvelashvili, M.A.Porai-Koshits	Zh.Neorg.Khim.(Russ.)(Russ.J.Inorg.Chem.)	1985	(C6 H16 Mn1 N8 O4 2+)n,2n(Cl1 1-),2n(H2 O1)	catena-(bis(mu!2$-Malonodihydrazide)-manganese dichloride dihydrate)		light yellow	Pbam	55		2.4	295	0.851	0				POLYMORPH: beta polymorph COLOR: light yellow
DUFKAS	Wei Meng, Zhongjun Lin, Ruiqin Zhong, Lidan Kong, Wang, Ruqiang Zou	Inorg.Chem.Commun.	2015	(C93 H82 Ce4 N5 O30 1+)n,n(N1 O3 1-),10n(H2 O1)	catena-((mu!6$-1,3,5-(4-Carboxylatophenyl)benzene)-bis(mu!5$-1,3,5-(4-carboxylatophenyl)benzene)-(mu!2$-hydroxo)-tetra-aqua-tetrakis(dimethylformamide)-(nitrato-O)-tetra-cerium nitrate decahydrate)		colorless	Cmca	64		9.55	293	0.718	0.718		at 293 K		TEMP: at 293 K COLOR: colorless
DUMMOP	Jingjing Wang, Jun Zhang, Fengyan Jin, Yanping Luo, Shufen Wang, Zaiyong Zhang, Yong Wu, Hongke Liu, Jack Y.Lu, Min Fang	CrystEngComm	2015	(C38 H24 N2 O8 Si1 Zn2)n	catena-[(mu-4,4'-bipyridine)-(mu-tetrakis(4-carboxylatophenyl)silane)-di-zinc unknown solvate]		colorless	P42/mmc	131	cuboid-like	6.28	100	0.645	0.645	C3',C4' and C3,C4,C6,C7 disordered over two sites with occupancies 0.5127:0.4873; C6',C7' disordered over one sites with occupancies 0.2563; Disordered solvent molecules were not modelled and the disordered density was taken into account using the SQUEEZE/PLATON procedure.			TEMP: 100 K COLOR: colorless "HABIT: cuboid-like
DUPKAC	Hongming He, Yang Song, Fuxing Sun, Zheng Bian, Lianxun Gao, Guangshan Zhu	J.Mater.Chem.A	2015	(C60 H36 O13 Zn4)n,5n(H2 O1),11n(C3 H7 N1 O1)	catena-[(mu-oxo)-tris(mu-1,1':3',1''-terphenyl-4,4''-dicarboxylato)-tetra-zinc N,N-dimethylformamide solvate pentahydrate]	JUC-135	courless	R3c	161	block	3.84	296	0.56	0	Disordered N,N-dimethylformamide and water solvent molecules were not modelled and the disordered density was taken into account using the SQUEEZE/PLATON procedure.	296 K		TEMP: 296 K COLOR: courless "HABIT: block
DUPVER	Hong Cai, Mian Li, Xiao-Rong Lin, Wei Chen, Guang-Hui Chen, Xiao-Chun Huang, Dan Li	Angew.Chem.,Int.Ed.	2015	(C23 H12 N5 O13 Zn3)n	catena-[bis(mu-benzene-1,3,5-tricarboxylato)-(mu-6-amino-purinyl)-tri-zinc unknown solvate]		colorless	P21/n	14	prism-like	8.47	293	0.815	0.815	The SQUEEZE/PLATON program has been used to model some disorder.	293 K		TEMP: 293 K COLOR: colorless "HABIT: prism-like
DURDAX	Jie Yang, Liangliang Zhang, Xiaoqing Wang, Rongming Wang, Fangna Dai, Daofeng Sun	RSC Advances	2015	(C31 H31 N3 O11 Zn2)n	catena-[(mu!7$-1,1':4',1''-terphenyl-3,3'',5,5''-tetracarboxylato)-tris(N,N-dimethylformamide)-di-zinc unknown solvate]		yellow	Pna21	33	block	6.06	293	0.989	0.989	The SQUEEZE/PLATON program has been used to model some disorder.	293 K		TEMP: 293 K COLOR: yellow "HABIT: block
DURDEB	Jie Yang, Liangliang Zhang, Xiaoqing Wang, Rongming Wang, Fangna Dai, Daofeng Sun	RSC Advances	2015	(C22 H14 O10 Zn2)n	catena-[(mu!8$-1,1':4',1''-terphenyl-3,3'',5,5''-tetracarboxylato)-diaqua-di-zinc unknown solvate]		yellow	R-3m	166	plate	7.03	294	0.713	0.707	The SQUEEZE/PLATON program has been used to model some disorder.	293.6 K		TEMP: 293.6 K COLOR: yellow "HABIT: plate
DURDIF	Jie Yang, Liangliang Zhang, Xiaoqing Wang, Rongming Wang, Fangna Dai, Daofeng Sun	RSC Advances	2015	(C26 H21 N1 O10 Zn2)n	catena-[(mu!7$-1,1':4',1''-terphenyl-3,3'',5,5''-tetracarboxylato)-(N,N-dimethylacetamide)-aqua-di-zinc unknown solvate]		colorless	P21	4	block	4.27	205	0.851	0.851	The SQUEEZE/PLATON program has been used to model some disorder.	absolute configuration		TEMP: 205 K ABS-CONFIG: absolute configuration
DUWYIF	R.J.Marshall, T.Richards, C.L.Hobday, C.F.Murphie, C.Wilson, S.A.Moggach, T.D.Bennett, R.S.Forgan	Dalton Trans.	2016	(C48 H32 Br6 O16 Zr3)n	catena-[tris(mu-4,4'-(1,2-dibromoethane-1,2-diyl)dibenzoato)-bis(mu-hydroxo)-bis(mu-oxido)-tri-zirconium unknown solvate]		colorless	Fm-3m	225	Prism	8.43	100	0.815	0.815	The SQUEEZE/PLATON program has been used to model some disorder.		The H atoms on the bridging OH groups have not been located and have been placed arbitrarily in the 2D diagram	TEMP: 100 K COLOR: colorless "HABIT: Prism
ECAHUN	Gui-Ge Hou, Yue Liu, Qi-Kui Lin, Jian-Ping Ma, Yu-Bin Dong	Chem.Commun.	2011	(C30 H24 N2 O4 Zn1)n	catena-(bis(mu!2$-3-(4-(pyridin-4-yl)phenyl)butane-1,3-dionato)-zinc unknown solvent)		brown	P-3	147	block	4.37	173	0.854	0.854	The SQUEEZE/PLATON program has been used to model some disorder.			TEMP: at 173 K COLOR: brown "HABIT: block
ECOKAJ	Yanxiong Ke, D.J.Collins, Daofeng Sun, Hong-Cai Zhou	Inorg.Chem.	2006	(C54 H28 N14 O14 Zn3)n,3n(C3 H7 N1 O1),5n(H2 O1)	catena-(diaqua-bis(mu!6$-1,3,4,6,7,9,9b-hepta-azaphenalene-2,5,8-tris(4-benzoato))-tri-zinc N,N-dimethylformamide solvate pentahydrate)	catena-(diaqua-bis(mu!6$-s-heptazine-2,5,8-tris(4-benzoato))-tri-zinc N,N-dimethylformamide solvate pentahydrate)	yellow	P4332	212	block	3.29	213	0.415	0	Disordered solvent N,N-dimethylformamide and water molecules were not modelled and the disordered density was taken into account with SQUEEZE/PLATON.		Temperature given as 293 K in CIF	TEMP: at 213 K COLOR: yellow "HABIT: block
ECOLEP	Mei-Na Li, Dong-Ying Du, Guang-Sheng Yang, Shun-Li Li, Ya-Qian Lan, Kui-Zhan Shao, Jun-Sheng Qin, Zhong-Min Su	Cryst.Growth Des.	2011	(C9 H15 Co2 N12 O6)n	catena-((mu!6$-benzene-1,3,5-tris(2H-tetrazolato))-hexa-aqua-di-cobalt)		red	P4132	213	block	4.17	293	0.518	0	The SQUEEZE/PLATON program has been used to model some disorder.	at 293 K		TEMP: at 293 K COLOR: red "HABIT: block
ECOWUQ	Yan-Ping He, Yan-Xi Tan, Jian Zhang	Inorg.Chem.	2012	(C42 H27 N3 O6 Zn2)n	catena-((mu!6$-4',4'',4'''-Nitrilotribiphenyl-4-carboxylato)-(imidazol-1,2-diyl)-di-zinc)		yellow	C2/c	15	prism	5.9	293	0.712	0.709	C1,N2 and C1',N4' disordered over two sites with occupancies 0.50:0.50. The imidazole ligand is disordered by symmetry.	at 293 K		TEMP: at 293 K COLOR: yellow "HABIT: prism
EDAPIK	A.Shigematsu, T.Yamada, H.Kitagawa	J.Am.Chem.Soc.	2012	(C50 H48 Cl4 Cu2 N8 O8)n	catena-(bis(mu!4$-3-(3-(Pyridin-3-yloxy)-2,2-bis((pyridin-3-yloxy)methyl)propoxy)pyridine)-tetrachloro-di-copper(ii))		blue	P42212	94	block	5.75	100	0.775	0.775			We calculate 47% void space in the structure	TEMP: at 100.1 K COLOR: blue "HABIT: block
EDUTUS	M.Eddaoudi, Jaheon Kim, N.Rosi, D.Vodak, J.Wachter, M.O'Keeffe, O.M.Yaghi	Science	2002	(C36 H18 O13 Zn4)n,6n(C5 H11 N1 O1)	catena-(tris(mu!4$-Naphthalene-2,6-dicarboxylato)-(mu!4$-oxo)-tetra-zinc hexakis(N,N-diethylformamide) clathrate)		colorless	Fm-3m	225	block	16.91	273	0.744	0	The naphthalene ring is disordered over two sites by symmetry. Only a few atoms from the guest molecules were located due to the disorder in the molecules.		dx given as 0.744	TEMP: at 273 K COLOR: colorless "HABIT: block
EDUVII	M.Eddaoudi, Jaheon Kim, N.Rosi, D.Vodak, J.Wachter, M.O'Keeffe, O.M.Yaghi	Science	2002	(C54 H36 O13 Zn4)n,10n(C5 H11 N1 O1),n(H2 O1)	catena-(tris(mu!4$-4,5,9,10-Tetrahydropyrene-2,7-dicarboxylato)-(mu!4$-oxo)-tetra-zinc decakis(N,N-diethylformamide) monohydrate clathrate)		pale yellow	Fm-3m	225	block	10.8	258	0.72	0	The ethylene chains are disordered over two sites by symmetry. Only a few atoms from the guest molecules were located due to the disorder in the molecules.		dx given as 0.72	TEMP: at 258 K COLOR: pale yellow "HABIT: block
EDUVOO	M.Eddaoudi, Jaheon Kim, N.Rosi, D.Vodak, J.Wachter, M.O'Keeffe, O.M.Yaghi	Science	2002	(C54 H24 O13 Zn4)n,6n(C5 H11 N1 O1),5n(H2 O1)	catena-(tris(mu!4$-Pyrene-2,7-dicarboxylato)-(mu!4$-oxo)-tetra-zinc hexakis(N,N-diethylformamide) pentahydrate clathrate)		pale yellow	Fm-3m	225	block	19.14	258	0.601	0.601	Only a few atoms from the guest molecules were located due to the disorder in the molecules.			TEMP: at 258 K COLOR: pale yellow "HABIT: block
EDUVUU	M.Eddaoudi, Jaheon Kim, N.Rosi, D.Vodak, J.Wachter, M.O'Keeffe, O.M.Yaghi	Science	2002	(C60 H36 O13 Zn4)n,n(C5 H11 N1 O1),5n(H2 O1)	catena-(tris(mu!4$-1,1':4',1''-Terphenyl-4,4''-dicarboxylato)-(mu!4$-oxo)-tetra-zinc N,N-diethylformamide pentahydrate clathrate)		colorless	Im-3m	229	cube	11.64	273	0.476	0	The complex is disordered equally over two sites by symmetry; only a few atoms from the guest molecules were located due to the disorder in the molecules.		The authors have stated that z=2 and dx=0.476 and that the values given in the paper and the supplementary data (z=1 and dx=0.238) are incorrect	TEMP: at 273 K COLOR: colorless "HABIT: cube
EDUWAB	M.Eddaoudi, Jaheon Kim, N.Rosi, D.Vodak, J.Wachter, M.O'Keeffe, O.M.Yaghi	Science	2002	(C60 H36 O13 Zn4)n,17n(C5 H11 N1 O1),2n(H2 O1)	catena-(tris(mu!4$-1,1':4',1''-Terphenyl-4,4''-dicarboxylato)-(mu!4$-oxo)-tetra-zinc heptadecakis(N,N-diethylformamide) dihydrate clathrate)		colorless	Pm-3m	221	cube	18.45	258	0.499	0.499	The complex is disordered equally over two sites by symmetry. Only a few atoms from the guest molecules were located due to the disorder in the molecules.			TEMP: 258 K COLOR: colorless "HABIT: cube
EFAYEQ	Liqing Ma, Jeong Yong Lee, Jing Li, Wenbin Lin	Inorg.Chem.	2008	(C176 H136 Cu8 O48)n,52n(C3 H7 N1 O1)	catena-(tetrakis(mu!8$-2,2'-Diethoxy-1,1'-biphenyl-3,3',5,5'-tetrakis(p-phenylenecarboxylato))-octa-aqua-octa-copper(ii) dopentacontakis(dimethylformamide) clathrate)		blue	C2/c	15	block	7.03	296	0.482	0	Several ethoxy moieties are disordered and the SQUEEZE routine has been used to account for the highly disordered solvent molecules.	twin; at 296 K		TEMP: at 296 K OTHER-DIFF: twin
EFAYIU	Liqing Ma, Jeong Yong Lee, Jing Li, Wenbin Lin	Inorg.Chem.	2008	(C176 H136 O48 Zn8)n,48n(C3 H7 N1 O1)	catena-(tetrakis(mu!8$-2,2'-Diethoxy-1,1'-biphenyl-3,3',5,5'-tetrakis(p-phenylenecarboxylato))-octa-aqua-octa-zinc(ii) octatetracontakis(dimethylformamide) clathrate)		colorless	C2/c	15	block	5.47	296	0.456	0.456	The structure has disorder in the ethoxy groups. All highly disordered solvent molecules have been accounted for using the SQUEEZE routine.	twin; at 296 K		TEMP: at 296 K OTHER-DIFF: twin
EGATEM	S.R.Caskey, A.J.Matzger	Inorg.Chem.	2008	(C59 H35 Co1 N1 O13 Zn2)n,n(C3 H7 N1 O1)	catena-(bis(mu!5$-1,3,5-tris(4-Carboxyphenyl)benzene)-(mu!3$-oxo)-(pyridine)-cobalt-di-zinc N,N-dimethylformamide unknown solvate)		pink	Pnma	62	Block	7.47	100	0.902	0.906	Disordered unspecified solvent molecules were not modelled and the disordered density was taken into account using the SQUEEZE/PLATON procedure.			TEMP: at 100 K COLOR: pink "HABIT: Block "ISO: isostructural with the nickel-zinc analogue
EGATIQ	S.R.Caskey, A.J.Matzger	Inorg.Chem.	2008	(C59 H35 N1 Ni1 O13 Zn2)n,n(C3 H7 N1 O1)	catena-(bis(mu!5$-1,3,5-tris(4-Carboxyphenyl)benzene)-(mu!3$-oxo)-(pyridine)-nickel-di-zinc N,N-dimethylformamide unknown solvate)		green	Pnma	62	Block	6.3	295	0.868	0.872	Disordered unspecified solvent molecules were not modelled and the disordered density was taken into account using the SQUEEZE/PLATON procedure.	at 295 K		TEMP: at 295 K COLOR: green "HABIT: Block "ISO: isostructural with the cobalt-zinc analogue
EGEJEG	A.K.Bar, R.Chakrabarty, G.Mostafa, P.S.Mukherjee	Angew.Chem.,Int.Ed.	2008	(C108 H82 Fe2 N8 P4 Pt2 4+)n,n(C216 H164 Fe4 N16 P8 Pt4 8+),12n(C1 F3 O3 S1 1-)	catena-((mu!4$-5,10,15,20-tetrakis(pyrid-4-yl)porphyrinato)-bis((ferrocenyl)bis(diphenylphosphino)-platinum) bis(mu!4$-5,10,15,20-tetrakis(pyrid-4-yl)porphyrinato)-tetrakis((ferrocenyl)bis(diphenylphosphino)-platinum) dodecatrifluoromethanesulfonate)		dark red	R-3m	166	Hexagonal prisms	11.76	150	0.946	0			Structure is described as a hexameric open box with 12 Pt atoms and 6 porphyrin ligands. We are unable to properly represent this due to program restrictions	TEMP: at 150 K COLOR: dark red "HABIT: Hexagonal prisms "SOURCE-CHEM: diethyl ether/nitromethane/dichloromethane
EGEJIK	A.D.Burrows, C.G.Frost, M.F.Mahon, C.Richardson	Angew.Chem.,Int.Ed.	2008	(C45 H28 O18 Zn4)n,4n(C3 H7 N1 O1)	catena-((mu!4$-oxo)-tris(mu!4$-2-formylbiphenyl-4,4'-dicarboxylato)-diaqua-tetra-zinc(ii) dimethylformamide solvate)		colorless	C2/m	12	Block	10.92	150	0.962	0.962	One phenyl ring is disordered over two sites by symmetry. Disordered DMF solvent molecules were not modelled and the disordered density was taken into account with SQUEEZE/PLATON.		The authors are not certain of the position of the formyl group, but they favour the 2 position	TEMP: at 150 K COLOR: colorless "HABIT: Block
EGEJUW	A.D.Burrows, C.G.Frost, M.F.Mahon, C.Richardson	Angew.Chem.,Int.Ed.	2008	(C51 H44 N2 O18 Zn4)n,3.2n(H2 O1)	catena-((mu!4$-Oxo)-tris(mu!4$-2-methoxybiphenyl-4,4'-dicarboxylato)-bis(dimethylformamide)-tetra-zinc(ii) hydrate)		orange	C2/m	12	Block	14.6	150	0.87	0.906	Methoxy groups are disordered over two sites. A phenyl ring is disordered by symmetry. The complex contains methoxy ligand 1.35(L3) hydrazone ligand 0.15(L2). Two partially occupaied DMF ligands lie on a mirror plane. 1.6 molecules of diffuse solvent (water) were accounted for using PLATON/SQUEEZE. The authors report the overall formulation for this compound is Zn4O(L2)0.3(L3)2.7(DMF)2,3.2(H2O).			TEMP: at 150 K COLOR: orange "HABIT: Block
EHIJAH	R.Grunker, I.Senkovska, R.Biedermann, N.Klein, M.R.Lohe, P.Muller, S.Kaskel	Chem.Commun.	2011	(C120 H72 N6 O26 Zn8)n	catena-(tris(mu!8$-4,4',4'',4'''-(biphenyl-4,4'-diyldinitrilo)tetrabenzoato)-bis(mu!4$-oxo)-octa-zinc unknown solvate)	DUT-13	colorless	R-3c	167	diamond	5.42	293	0.385	0.385	The SQUEEZE/PLATON program has been used to model the solvent molecules.	synchrotron radiation; at 293 K		TEMP: at 293 K RADIATION: synchrotron radiation
EJEBUS	Teng Zhang, K.Manna, Wenbin Lin	J.Am.Chem.Soc.	2016	(C48 H32 N6 O16 Zr3)n	catena-(tris(mu!4$-5,5'-bis(2-Carboxylatoethenyl)-2,2'-bipyridine)-bis(mu!3$-hydroxo)-bis(mu!3$-oxo)-tri-zirconium unknown solvate)			Fm-3m	225		11.77	100	0.473	0.467	The structure is disordered by symmetry. The SQUEEZE/PLATON program was used to model some disordered solvent.			TEMP: 100 K
EJELIP	J.Lewinski, T.Kaczorowski, I.Justyniak, D.Prochowicz	Chem.Commun.	2011	(C7 H8)n,n(C88 H120 Al4 N8 O4 Zn2)	catena-(tetrakis(mu!3$-cinchonine)-dodecamethyl-tetra-aluminium-di-zinc toluene solvate)		colorless	P21212	18	prism	7.36	100	0.985	0	The SQUEEZE/PLATON program has been used to account for the highly disordered toluene solvate.			TEMP: at 100 K COLOR: colorless "HABIT: prism
EJESUJ	Min Zhu, Xuezi Song, Shuyan Song, Shuna Zhao, Xing Meng, Lanlan Wu, Cheng Wang, Hongjie Zhang	Adv. Sci.	2015	(C60 H42 Eu2 N14 Na1 O28 5-)n,2(H3 O1 1+),Eu1 3+	catena-[bis(oxonium) europium(iii) bis(mu-5,5',5''-(1,3,5-triazine-2,4,6-triyltriazanediyl)tri(benzene-1,3-dicarboxylato))-bis(N,N-dimethylformamide)-diaqua-di-europium(iii)-sodium(i) unknown solvate]		colorless	C2/c	15	block	8.71	293	0.727	0.601	Disordered solvent molecules were not modelled and the disordered density was taken into account using the SQUEEZE/PLATON procedure.	293 K	Only the oxygen atoms of the coordinated N,N-dimethylformamide molecules have been modelled	TEMP: 293 K COLOR: colorless "HABIT: block
EJETAQ	Min Zhu, Xuezi Song, Shuyan Song, Shuna Zhao, Xing Meng, Lanlan Wu, Cheng Wang, Hongjie Zhang	Adv. Sci.	2015	(C69 H67 Eu3 N17 Na1 O33 2-)n,2(H3 O1 1+)	catena-[bis(oxonium) bis(mu-5,5',5''-(1,3,5-triazine-2,4,6-triyltriazanediyl)tri(benzene-1,3-dicarboxylato))-pentakis(N,N-dimethylformamide)-diaqua-tri-europium-sodium unknown solvate]		colorless	P21/n	14	block	6.6	193	0.857	0.816	Disordered cation/solvent molecules were not modelled and the disordered density was taken into account using the SQUEEZE/PLATON procedure.			TEMP: 193 K COLOR: colorless "HABIT: block
EKADIF	Xiao-Wei Zhu, Xiao-Ping Zhou, Dan Li	Chem.Commun.	2016	(C8 H6 N6 Zn1)n	catena-[(mu-5,5'-(hydrazinediylidenedimethanylylidene)di(imidazolyl))-zinc unknown solvate]	Cu0.1-STU-1S	light green	Ia-3d	230	Block	6.02	293	0.978	0.977	C4,C5,N3,N4 and C4A,C5A,N3A,N4A disordered over two sites with occupancies 0.553:0.447; Zn1 and Cu1 disordered over two sites with occupancies 0.90:0.10; Disordered solvent molecules were not modelled and the disordered density was taken into account using the SQUEEZE/PLATON procedure.	293 K	The structure has been doped with Cu 0.1:0.9 Zn	TEMP: 293 K COLOR: light green "HABIT: Block
EKEMEO	Jingjing Jiao, Huimin Liu, Dongjie Bai, Yabing He	Inorg.Chem.	2016	(C47 H32 Cu4 O22)n,6(C3 H7 N1 O1),2(C2 H6 O1),H2 O1	catena-[(mu-2',2''-[propane-1,3-diylbis(oxy)]bis(1,1':4',1''-terphenyl-3,3'',5,5''-tetracarboxylato))-tetra-aqua-tetra-copper N,N-dimethylformamide ethanol solvate monohydrate]	ZJNU-80	blue	R-3m	166	block	7.26	100	0.75	0.767	The structure is disordered. Disordered solvent molecules were not modelled and the disordered density was taken into account using the SQUEEZE/PLATON procedure.			TEMP: 100 K COLOR: blue "HABIT: block
ELEREU	Zhiyong Lu, Junfeng Bai, Cheng Hang, Fei Meng, Wenlong Liu, Yi Pan, Xiaozeng You	Chem.-Eur.J.	2016	(C37 H23 Cu2 N5 O13)n	catena-[(mu-5,5'-(pyridine-3,5-diylbis(carbonylazanediyl-4,1-phenylenecarbonylazanediyl))di(benzene-1,3-dicarboxylato))-aqua-di-copper unknown solvate]	NJU-Bai22	blue	Im-3m	229	block	3.46	173	0.599	0.599	The structure is disordered. Disordered solvent molecules were not modelled and the disordered density was taken into account using the SQUEEZE/PLATON procedure.			TEMP: 173 K OTHER-EXP: Adsorption properties
ELERIY	Zhiyong Lu, Junfeng Bai, Cheng Hang, Fei Meng, Wenlong Liu, Yi Pan, Xiaozeng You	Chem.-Eur.J.	2016	(C25 H11 Cu2 N1 O9)n	catena-[(mu-5,5'-(pyridine-3,5-diyldiethyne-2,1-diyl)diisophthalato)-aqua-di-copper unknown solvate]	NJU-Bai20	green	Im-3m	229	block	9.7	293	0.79	0.787	Disordered solvent molecules were not modelled and the disordered density was taken into account using the SQUEEZE/PLATON procedure.	293 K		TEMP: 293 K OTHER-EXP: Adsorption properties
ELEROE	Zhiyong Lu, Junfeng Bai, Cheng Hang, Fei Meng, Wenlong Liu, Yi Pan, Xiaozeng You	Chem.-Eur.J.	2016	(C23 H13 Cu2 N3 O11)n	catena-[(mu-5,5'-(pyridine-3,5-diylbis(carbonylazanediyl))di(benzene-1,3-dicarboxylato))-aqua-di-copper unknown solvate]	NJU-Bai21	blue	Im-3m	229	block	11.34	296	0.899	0.896	The structure is disordered. Disordered solvent molecules were not modelled and the disordered density was taken into account using the SQUEEZE/PLATON procedure.	296 K		TEMP: 296 K OTHER-EXP: Adsorption properties
ELOYOV	Li-Long Dang, Xiao-Jing Zhang, Le Zhang, Jian-Qiang Li, Feng Luo, Xue-Feng Feng	J.Coord.Chem.	2016	(C32 H20 Co1 N6 O6)n,C3 H7 N1 O1	catena-[(mu-3,3'-diazene-1,2-diyldibenzoato)-(mu-N,N'-bis(pyridin-4-yl)terephthalamide)-cobalt N,N-dimethylformamide solvate]			P-1	2		11.15	296	0.915	0.819	C19,C20,C23,C24,C25,O6 and C19',C20',C23',C24',C25',O6' disordered over two sites with occupancies 0.554:0.446.	296 K	The structure contains void space which contain unmodelled solvent molecules	TEMP: 296 K
EMEJIR	Y.Maximilian Klein, A.Prescimone, M.B.Pitak, S.J.Coles, E.C.Constable, C.E.Housecroft	CrystEngComm	2016	(C224 H216 Co4 N32 O8 S8)n	catena-(octakis(mu!2$-4'-(4-(Hexyloxy)phenyl)-4,2':6',4''-terpyridine)-octakis(isothiocyanato)-tetra-cobalt)		orange	P41212	92	block	9.01	100	1	1	The MASK/OLEX2 program has been used to model some disorder.	twin		TEMP: 100 K STEREOMER: for stereoisomer see [EMEJOX] "OTHER-DIFF: twin
EMITUQ	Shunshun Xiong, Sujing Wang, Xinjun Tang, Zhiyong Wang	CrystEngComm	2011	(C38 H20 N2 O12 S2 Zn2)n	catena-(bis(mu!4$-5,5-dioxodibenzo[b,d]thiophene-3,7-dicarboxylato)-(mu!2$-4,4'-bipyridine)-di-zinc unknown solvate)		colorless	P21/c	14	block	6.61	180	0.974	0.974	The SQUEEZE/PLATON program has been used to model some disorder.			TEMP: at 180 K COLOR: colorless "HABIT: block
EMITUQ01	T.Yamada, S.Iwakiri, T.Hara, K.Kanaizuka, M.Kurmoo, H.Kitagawa	Cryst.Growth Des.	2011	(C38 H20 N2 O12 S2 Zn2)n	catena-(bis(mu!4$-dibenzo[b,d]thiophene-3,7-dicarboxylato 5,5-dioxide)-(mu!2$-4,4'-bipyridine)-di-zinc(ii) unknown solvate)		colorless	P21/c	14	block	2.95	100	0.998	0.998	The disordered unknown solvent molecules were not modelled and the disordered density was taken into account using the SQUEEZE/PLATON procedure.			TEMP: at 100 K COLOR: colorless "HABIT: block
EMIYUW	Jialiu Ma, Ly D.Tran, A.J.Matzger	Cryst.Growth Des.	2016	(C40 H30 O16 Zr3)n	catena-[(mu!8$-3,3',5,5'-tetrakis(4-carboxylatophenyl)-1,1'-biphenyl)-bis(mu!3$-hydroxo)-bis(mu!3$-oxo)-diaqua-dihydroxy-tri-zirconium(iv) unknown solvate]	UMCM-312	green	Fmmm	69	prism	5.4	85	0.722	0.721	Disordered solvent molecules were not modelled and the disordered density was taken into account using the SQUEEZE/PLATON procedure.			TEMP: 85 K COLOR: green "HABIT: prism
EMIZAD	Jialiu Ma, Ly D.Tran, A.J.Matzger	Cryst.Growth Des.	2016	(C48 H32 O16 Zr3)n	catena-[(mu!8$-2,5,8,11-tetrakis(4-carboxylatophenyl)perylene)-bis(mu!3$-hydroxo)-bis(mu!3$-oxo)-diaqua-dihydroxy-tri-zirconium(iv) unknown solvate]	UMCM-313	orange	P6/mmm	191	block	8.06	85	0.406	0.406	Disordered solvent molecules were not modelled and the disordered density was taken into account using the SQUEEZE/PLATON procedure.			TEMP: 85 K COLOR: orange "HABIT: block
ENIHUG	Hang Xu, Xiao-Fang Liu, Chun-Shuai Cao, Bin Zhao, Peng Cheng, Liang-Nian He	Adv. Sci.	2016	(C27 H17 Cu2 N1 O10)n	catena-[(mu-5-(2,6-bis(4-carboxylatophenyl)pyridin-4-yl)isophthalato)-diaqua-di-copper unknown solvate]		green	R3m	160	block	6.12	130	0.616	0.616	The SQUEEZE/PLATON program has been used to model some disorder.			TEMP: 130 K COLOR: green "HABIT: block
ENOWUB	A.Naeem, V.P.Ting, U.Hintermair, Mi Tian, R.Telford, S.Halim, H.Nowell, M.Holynska, S.J.Teat, I.J.Scowen, S.Nayak	Chem.Commun.	2016	(C48 H32 O16 Zr3)n	catena-[tris(mu-4,4'-stilbenedicarboxylato)-bis(mu-hydroxy)-bis(mu-oxido)-tri-zirconium unknown solvate]	UBMOF-9	colorless	Fm-3m	225	octahedron	5.49	250	0.563	0.567	C6 disordered by symmetry over two configurations with occupancy 0.50; The SQUEEZE/PLATON program has been used to model some disorder.	synchrotron		TEMP: 250 K RADIATION: synchrotron
EQERAU	A.M.Bohnsack, I.A.Ibarra, P.W.Hatfield, J.W.Yoon, Young Kyu Hwang, Jong-San Chang, S.M.Humphrey	Chem.Commun.	2011	(C42 H34 Mg4 O20 P2)n,n(C3 H7 N1 O1)	catena-(bis(mu!7$-tris(4-carboxyphenyl)phosphine oxide)-bis(mu!3$-hydroxo)-tetraaqua-tetra-magnesium N,N-dimethylformamide solvate)	PCM-11	colorless	P21/c	14	rod	7.83	180	0.958	0.951				TEMP: at 180 K COLOR: colorless "HABIT: rod
EQOCOC01	Kyo Sung Park, Zheng Ni, A.P.Cote, Jae Yong Choi, Rudan Huang, F.J.Uribe-Romo, H.K.Chae, M.O'Keeffe, O.M.Yaghi	Proc.Nat.Acad.Sci.USA	2006	(C12 H12 N8 Zn2)n,n(H2 O1)	catena-(tetrakis(mu!2$-Imidazolato-N,N')-di-zinc(ii) unknown clathrate monohydrate)	ZIF-6	colorless	I41/amd	141	block	6.42	258	0.798	0.794	Two C atoms from the imidazole ring are disordered over two sites with occupancies 0.50:0.50 and 0.53:0.47. The structure contains highly disordered guest molecules which were modelled as a number of water molecules.		U.S. Patent: US 0132549 A1	TEMP: at 258 K COLOR: colorless "HABIT: block
EQOXEN	Dong Mok Shin, In Su Lee, Young Keun Chung	Inorg.Chem.	2003	(C120 H90 Co3 N24 S6)n	catena-(hexakis(mu!2$-1,3-bis(trans-4-pyridylethenyl)pyridine)-hexakis(isothiocyanato)-tri-cobalt(ii))		orange	C2/m	12	block	13.03	298	0.911	0.911		at 298 K		TEMP: at 298 K COLOR: orange "HABIT: block
EREGOY	Jian Tian, R.K.Motkuri, P.K.Thallapally, B.P.McGrail	Cryst.Growth Des.	2010	(C33 H30 Cd2 O15)n	catena-((mu!7$-tetrakis(4-Methyloxabenzoato)methane)-triaqua-di-cadmium unknown solvate)		colorless	Pna21	33	rectangular	3.47	100	0.936	0.93	The SQUEEZE/PLATON program has been used to model some unspecified disordered solvent molecules.			TEMP: at 100 K COLOR: colorless "HABIT: rectangular
ERUGAZ	Zheng Huang, Hai-Bin Song, Miao Du, Shen-Tan Chen, Xian-He Bu, J.Ribas	Inorg.Chem.	2004	(C26 H16 Co1 N10 S4)n,2.5n(H2 O1)	catena-(bis(mu!2$-2,5-bis(Pyrid-4-yl)-1,3,4-thiadiazole-N,N')-bis(isothiocyanato-N)-cobalt(ii) hydrate)		red	Pnna	52	block	6.39	293	0.803	0.803	A thiadiazole ring is disordered over two sites with occupancies 0.55:0.45 and an isothiocyanate group is disordered over two sites with occupancies 0.54:0.46. The water molecules are also disordered.	at 293 K		TEMP: at 293 K COLOR: red "HABIT: block "SENS: air-sensitive
ETAXUT	Shuanbing Han, Zhenbo Ma, Yanhu Wei, V.Ch.Kravtsov, B.S.Luisi, I.Kulaots, B.Moulton	CrystEngComm	2011	(C120 H76 N4 O30 Zn8)n,n(C108 H48 O26 Zn8),4n(C3 H7 N1 O1),20n(H2 O1)	catena-(hexakis(mu!4$-4,4'-Buta-1,3-diyne-1,4-diyldibenzoato)-bis(mu!4$-oxo)-tetrakis(dimethylformamide)-octa-zinc hexakis(mu!4$-4,4'-buta-1,3-diyne-1,4-diyldibenzoato)-bis(mu!4$-oxo)-octa-zinc dimethylformamide solvate icosahydrate)		pale yellow	P3112	151	block	7.88	100	0.871	0.874	One of the water molecules is disordered.			TEMP: at 100 K COLOR: pale yellow "HABIT: block
EWALUK	Tae-Hong Park, Kyoungmoo Koh, A.G.Wong-Foy, A.J.Matzger	Cryst.Growth Des.	2011	(C54 H48 O13 Zn4)n	catena-(tris(mu!4$-2,2',6,6'-tetramethylbiphenyl-4,4'-dicarboxylato)-(mu!4$-oxo)-tetra-zinc(ii) unknown solvate)		colorless	R-3c	167	block	8.24	293	0.793	0.793	The disordered unknown solvent molecules were not modelled and the disordered density was taken into account using the SQUEEZE/PLATON procedure.	at 293 K		TEMP: at 293 K COLOR: colorless "HABIT: block
EWEQIH	Yong-jun Li, Ying-jie Zhao, A.H.Flood, Chao Liu, Hui-biao Liu, Yu-liang Li	Chem.-Eur.J.	2011	(C75 H53 N17 O2 Zn1)n	catena-(5,15-bis(Pyridine-2,6-diylbis(1-(4'-(4-(1,4-phenylenoxymethyl)-1H-1,2,3-triazol-1-ylmethyl)biphenyl-4-ylmethyl)-1H-1,2,3-triazol-4-yl)porphyrinato)-zinc)		red	P-1	2	plate	7.9	173	0.915	0.915	The SQUEEZE/PLATON program has been used to model some disorder.			TEMP: at 173 K COLOR: red "HABIT: plate
EWUHIO	Qian-Rong Fang, Da-Qian Yuan, J.Sculley, Jian-Rong Li, Zheng-BoHan, Hang-Cai Zhou	Inorg.Chem.	2010	(C48 H30 N12 O13 Zn4)n,17n(C3 H7 N1 O1),3n(H2 O1)	catena-(bis(mu!6$-4,4',4''-s-Triazine-1,3,5-triyl-p-aminobenozato)-(mu!6$-oxo)-tetra-zinc N,N-dimethylformamide solvate trihydrate)		colorless	Pa-3	205	block	4.94	213	0.833	0	The two Zn atoms have occupancies of 0.50, symmetry related. The SQUEEZE/PLATON program has been used to model some disordered solvent molecules. A phenyl ring is disordered over two sites with occupancies of 0.569:0.431.			TEMP: at 213 K COLOR: colorless "HABIT: block
EWUHOU	Qian-Rong Fang, Da-Qian Yuan, J.Sculley, Jian-Rong Li, Zheng-BoHan, Hang-Cai Zhou	Inorg.Chem.	2010	(C54 H36 N6 O13 Zn4)n,16n(C3 H7 N1 O1),5n(H2 O1)	catena-(bis(mu!6$-4,4',4''-(Benzene-1,3,5-triyl-tris(azanediyl))tribenzoato)-(mu!6$-oxo)-tetra-zinc N,N-dimethylformamide solvate pentahydrate)		brown	Pa-3	205	block	8.21	213	0.815	0	A phenyl group is disordered over two sites with occupancies of 0.483:0.517; the zinc atoms have partial occupancies of 0.50, by symmetry. The SQUEEZE/PLATON program has been used to model some disordered solvent molecules.			TEMP: at 213 K COLOR: brown "HABIT: block
EXEXEL	M.Tonigold, Ying Lu, A.Mavrandonakis, A.Puls, R.Staudt, J.Mollmer, J.Sauer, D.Volkmer	Chem.-Eur.J.	2011	(C48 H48 Co4 N12 O1)n,2n(C3 H7 N1 O1)	catena-(tris(mu!4$-1,4-bis(3,5-dimethylpyrazol-4-yl)benzene)-(mu!4$-oxo)-tetra-cobalt N,N-dimethylformamide solvate)	MFU-1	blue	P-43m	215	cube	5.29	120	0.502	0	The structure is disordered by symmetry; The SQUEEZE/PLATON program has been used to model the solvent molecules.		The exact number of N,N-dimethylformamide solvent molecules is unclear	TEMP: at 120 K COLOR: blue "HABIT: cube
EXOTOB	Ze Chang, Da-Shuai Zhang, Tong-Liang Hu, Xian-He Bu	Inorg.Chem.Commun.	2011	(C192 H174 N48 Ni12 O60)n	catena-[tris(mu!4$-1,1'-biphenyl-2,2',6,6'-tetraacetato)-octakis(mu!3$-2,4,6-tris(4-pyridyl)-1,3,5-triazine)-tetracosaaqua-dodecahydroxy-dodeca-nickel unknown solvate]		green	F-43c	219	prism	3.95	293	0.819	0	The SQUEEZE/PLATON program has been used to model some disorder.	at 293 K		TEMP: at 293 K COLOR: green "HABIT: prism
EXOTUH	Ze Chang, Da-Shuai Zhang, Tong-Liang Hu, Xian-He Bu	Inorg.Chem.Commun.	2011	(C34 H20 Cd1 N6 O8)n	catena-[(mu!3$-2,4,6-tris(4-pyridyl)-1,3,5-triazine)-(mu!2$-1,1'-biphenyl-2,2'-diacetato-6,6'-diacetic acid)-cadmium unknown solvate]		colorless	P3221	154	block	12.38	293	0.951	0.948	The SQUEEZE/PLATON program has been used to model the disordered solvent molecules.	at 293 K		TEMP: at 293 K COLOR: colorless "HABIT: block
EZIMAC	Xinfang Liu, Minhak Oh, Myoung Soo Lah	Inorg.Chem.	2011	(C15 H7 Cu1 N1 O4)n	catena-[(mu!5$-5-(Pyridin-3-ylethynyl)isophthalato-N,O,O',O'',O''')-copper(ii)]	catena-[(mu!5$-5-(Pyridin-3-ylethynyl)benzene-1,3-dicarboxylato-N,O,O',O'',O''')-copper(ii)]	blue	R-3c	167	hexagonal plate	5.24	99	0.94	0.94		synchrotron radiation		TEMP: at 99 K RADIATION: synchrotron radiation "OTHER-EXP: The as-synthesised crystal was vacuum-dried at 200 deg.C overnight to remove solvent molecules
EZIMIK	Xinfang Liu, Minhak Oh, Myoung Soo Lah	Inorg.Chem.	2011	(C15 H7 N1 O4 Zn1)n	catena-[(mu!5$-5-(Pyridin-3-ylethynyl)isophthalato-N,O,O',O'',O''')-zinc(ii)]	catena-[(mu!5$-5-(Pyridin-3-ylethynyl)benzene-1,3-dicarboxylato-N,O,O',O'',O''')-zinc(ii)]	colorless	R-3m	166	block	5.81	173	0.9	0.9	The pyridyl unit of the ligand is disordered by symmetry.			TEMP: at 173 K OTHER-EXP: The as-synthesised crystal was vacuum-dried at 150 deg.C overnight to remove solvent molecules
FAGQAI	Nianyong Zhu, D.Sensharma, Paul Wix, M.J.Lennox, T.Duren, Wai-Yeung Wong, Wolfgang Schmit	Eur.J.Inorg.Chem.	2016	(C69 H41 Cu3 N1 O15)n	catena-(bis(mu!6$-4,4',4''-(Benzene-1,3,5-triyltriethyne-2,1-diyl)tribenzoato)-diaqua-dimethylformamide-tri-copper unknown solvate)	TCM-10	blue	P21/c	14	block	6.81	220	0.525	0.525	The SQUEEZE/PLATON program has been used to model some disordered solvent.			TEMP: 220 K COLOR: blue "HABIT: block
FAHPOV	A.D.Burrows, L.C.Fisher, D.Hodgson, M.F.Mahon, N.F.Cessford, T.Duren, C.Richardson, S.P.Rigby	CrystEngComm	2012	(C48 H28 O15 Zn4)n,6n(C3 H7 N1 O1)	catena-(tris(mu!4$-4,4'-ethyne-1,2-diyldibenzoato)-(mu!4$-oxo)-diaqua-tetra-zinc N,N-dimethylformamide solvate)		colorless	Pnmn	58	block	6.02	200	0.671	0.671	The SQUEEZE/PLATON program has been used to model the solvent molecules.			TEMP: at 200 K COLOR: colorless "HABIT: block
FAHQIQ	Guangpeng Zhou, Yulin Yang, Ruiqing Fan, Wenwu Cao, Bin Yang	CrystEngComm	2012	(C28 H16 In1 O8 1-)n,n(C2 H8 N1 1+),n(H2 O1)	catena-(dimethylammonium bis(mu!2$-biphenyl-4,4'-dicarboxylato)-indium monohydrate)		colorless	Fddd	70	octahedral block	6.96	294	0.945	0.945	C29,C30,N1 disordered by symmetry over two sites with occupancy 0.50; O1W and O3WA disordered over two sites with occupancies 0.50:0.50; O3W and O3WA disordered over two sites with occupancies 0.25:0.50.	at 294 K		TEMP: at 294 K COLOR: colorless "HABIT: octahedral block
FALBAX	Y.Inokuma, N.Kojima, T.Arai, M.Fujita	J.Am.Chem.Soc.	2011	(C156 H96 Co6 N60 S12)n,16.32n(C12 H11 N1 O1)	catena-[octakis(mu!3$-tris(4-Pyridyl)triazine)-dodecakis(isothiocyanato)-hexa-cobalt(ii) hexadecakis(4-hydroxydiphenylamine) clathrate]		red	Fd-3c	228	prism	15.81	90	0.828	0.828	S2A and S2B disordered over two sites with occupancies 0.727:0.273.			TEMP: at 90 K COLOR: red "HABIT: prism
FANWOI	J.Lincke, D.Lassig, K.Stein, J.Moellmer, A.V.Kuttatheyil, C.Reichenbach, A.Moeller, R.Staudt, G.Kalies, M.Bertmer, H.Krautscheid	Dalton Trans.	2012	(C78 H54 N18 O13 Zn4)n	catena-[tris(mu!4$-4,4'-(Benzene-1,3-diylbis(5-methyl-4H-1,2,4-triazole-3,4-diyl))dibenzoato-N,O,O',O'')-(mu!4$-oxo)-tetra-zinc(ii)]		colorless	P31c	159	prism	3.45	180	0.996	0.996				TEMP: at 180 K OTHER-EXP: The crystal was heated to 180 deg.C at ambient pressure within 24h, held at 180 deg.C for 4h and then cooled to RT over a 12h period
FAWCEN03	W.Morris, C.J.Stevens, R.E.Taylor, C.Dybowski, O.M.Yaghi, M.A.Garcia-Garibay	J.Phys.Chem.C	2012	(C8 H10 N4 Zn1)n	catena-[bis(mu!2$-2-Methylimidazolyl)-zinc(ii) unknown solvate]	ZIF-8		I-43m	217		4.77	298	0.921	0.921	Solvent water, modelled in the structure from diffraction data at low temperature, is not present in this structural model from a room temperature data set. We calculate 29% void space in the structure.	at 298 K		TEMP: at 298 K
FAYPAY	Ya-Qian Lan, Shun-li Li, Hai-Long Jiang, Qiang Xu	Chem.-Eur.J.	2012	(C69 H50 N18 O13 Zn5)n	catena-[(mu!4$-tetrakis((4-Carboxylatophenoxy)methyl)methane)-hexakis(mu!3$-benzotriazolyl)-aqua-penta-zinc(ii) unknown solvate]	DMOF-1	colorless	C2/c	15	block	4.58	293	0.681	0.681	Disordered solvent molecules were not modelled and the disordered density was taken into account using the SQUEEZE/PLATON procedure. The unit cell was found to contain a void of 21555 A$3! holding 6244 electrons.	at 293 K		TEMP: at 293 K COLOR: colorless "HABIT: block "ISO: Isostructural with the 5-methylbenzotriazole and 5,6-dimethylbenzotriazole analogues
FAYPEC	Ya-Qian Lan, Shun-li Li, Hai-Long Jiang, Qiang Xu	Chem.-Eur.J.	2012	(C81 H72 N18 O12 Zn5)n,n(H2 O1)	catena-[(mu!4$-tetrakis((4-Carboxylatophenoxy)methyl)methane)-hexakis(mu!3$-5,6-dimethylbenzotriazolyl)-penta-zinc(ii) unknown solvate monohydrate]	DMOF-2	colorless	C2/c	15	block	4.97	293	0.753	0.753	Disordered solvent molecules were not modelled and the disordered density was taken into account using the SQUEEZE/PLATON procedure. The unit cell was found to contain a void of X18741 A$3! holding 4325 electrons.	at 293 K		TEMP: at 293 K COLOR: colorless "HABIT: block "ISO: Isostructural with the benzotriazole and 5-methylbenzotriazole analogues
FAYPIG	Ya-Qian Lan, Shun-li Li, Hai-Long Jiang, Qiang Xu	Chem.-Eur.J.	2012	(C75 H60 N18 O12 Zn5)n,n(H2 O1)	catena-[(mu!4$-tetrakis((4-Carboxylatophenoxy)methyl)methane)-hexakis(mu!3$-5-methylbenzotriazolyl)-penta-zinc(ii) unknown solvate monohydrate]	DMOF-3	colorless	P-1	2	block	8.35	293	0.75	0.75	Disordered solvent molecules were not modelled and the disordered density was taken into account using the SQUEEZE/PLATON procedure. The unit cell was found to contain a void of 4869 A$3! holding 1279 electrons.	at 293 K		TEMP: at 293 K COLOR: colorless "HABIT: block "ISO: Isostructural with the benzotriazole and 5,6-dimethylbenzotriazole analogues
FAYPOM	Ya-Qian Lan, Shun-li Li, Hai-Long Jiang, Qiang Xu	Chem.-Eur.J.	2012	(C73 H56 N18 O16 Zn5)n,2n(H2 O1)	catena-[(mu!4$-tetrakis((4-Carboxylato-2-methoxyphenoxy)methyl)methane)-hexakis(mu!3$-benzotriazolyl)-penta-zinc(ii) unknown solvate dihydrate]	DMOF-4	colorless	C2/c	15	block	8.41	293	0.907	0.907	Disordered solvent molecules were not modelled and the disordered density was taken into account using the SQUEEZE/PLATON procedure. The unit cell was found to contain a void of 6940 A$3! holding 333 electrons.	at 293 K		TEMP: at 293 K COLOR: colorless "HABIT: block
FAYPUS	Ya-Qian Lan, Shun-li Li, Hai-Long Jiang, Qiang Xu	Chem.-Eur.J.	2012	(C85 H80 N18 O16 Zn5)n	catena-[(mu!4$-tetrakis((4-Carboxylato-2-methoxyphenoxy)methyl)methane)-hexakis(mu!3$-5,6-dimethylbenzotriazolyl)-penta-zinc(ii) unknown solvate]	DMOF-5	colorless	C2/c	15	block	10.93	293	0.842	0.842	Disordered solvent molecules were not modelled and the disordered density was taken into account using the SQUEEZE/PLATON procedure. The unit cell was found to contain two voids of 8378 A$3!, each holding 206 electrons.	at 293 K		TEMP: at 293 K COLOR: colorless "HABIT: block
FAYQAZ	Ya-Qian Lan, Shun-li Li, Hai-Long Jiang, Qiang Xu	Chem.-Eur.J.	2012	(C79 H68 N18 O16 Zn5)n	catena-[(mu!4$-tetrakis((4-Carboxylato-2-methoxyphenoxy)methyl)methane)-hexakis(mu!3$-5-methylbenzotriazolyl)-penta-zinc(ii) unknown solvate]	DMOF-6	colorless	C2/c	15	block	6.96	293	0.816	0.816	Disordered solvent molecules were not modelled and the disordered density was taken into account using the SQUEEZE/PLATON procedure. The unit cell was found to contain two voids of 8665 A$3!, each holding 217 electrons.	at 293 K		TEMP: at 293 K COLOR: colorless "HABIT: block
FAYQED	Ya-Qian Lan, Shun-li Li, Hai-Long Jiang, Qiang Xu	Chem.-Eur.J.	2012	(C97 H80 N18 O12 Zn5)n,0.67n(H2 O1)	catena-[(mu!4$-tetrakis(((6-Carboxylatonaphthalen-2-yl)oxy)methyl)methane)-hexakis(mu!3$-5,6-dimethylbenzotriazolyl)-penta-zinc(ii) unknown solvate]	DMOF-8	colorless	C2	5	block	8.28	293	0.805	0	The structure consists of two independent frameworks, one of which has a 5,6-dimethylbenzotriazolyl ligand disordered by symmetry. Disordered solvent molecules were not modelled and the disordered density was taken into account using the SQUEEZE/PLATON procedure. The unit cell was found to contain a void of 14404 A$3! holding 1864 electrons.	at 293 K		TEMP: at 293 K COLOR: colorless "HABIT: block
FAYQIH	Ya-Qian Lan, Shun-li Li, Hai-Long Jiang, Qiang Xu	Chem.-Eur.J.	2012	(C77 H56 N18 O12 Zn5)n	catena-[(mu!4$-tetrakis((4-(2-Carboxylatoethenyl)phenoxy)methyl)methane)-hexakis(mu!3$-benzotriazolyl)-penta-zinc(ii) unknown solvate]	DMOF-9	colorless	C2/c	15	block	6.71	293	0.902	0.902	Disordered solvent molecules were not modelled and the disordered density was taken into account using the SQUEEZE/PLATON procedure. The unit cell was found to contain a void of 13644 A$3! holding 425 electrons.	at 293 K		TEMP: at 293 K COLOR: colorless "HABIT: block
FAYQON	Ya-Qian Lan, Shun-li Li, Hai-Long Jiang, Qiang Xu	Chem.-Eur.J.	2012	(C83 H68 N18 O12 Zn5)n	catena-[(mu!4$-tetrakis((4-(2-Carboxylatoethenyl)phenoxy)methyl)methane)-hexakis(mu!3$-5-methylbenzotriazolyl)-penta-zinc(ii) unknown solvate]	DMOF-11	colorless	C2/c	15	block	13.68	293	0.944	0.944	Disordered solvent molecules were not modelled and the disordered density was taken into account using the SQUEEZE/PLATON procedure. The unit cell was found to contain one major void of 13032 A$3! holding 491 electrons.	at 293 K		TEMP: at 293 K COLOR: colorless "HABIT: block
FAYQUT	Ya-Qian Lan, Shun-li Li, Hai-Long Jiang, Qiang Xu	Chem.-Eur.J.	2012	(C93 H64 N18 O12 Zn5)n,n(H2 O1)	catena-[(mu!4$-tetrakis(((4'-Carboxylatobiphenyl-4-yl)oxy)methyl)methane)-hexakis(mu!3$-benzotriazolyl)-penta-zinc(ii) unknown solvate monohydrate]	DMOF-13	colorless	C2/c	15	block	14.48	293	0.785	0.785	Oxygen atoms from the tetrabiphenyl ligand are disordered over two sites. Disordered solvent molecules were not modelled and the disordered density was taken into account using the SQUEEZE/PLATON procedure. The unit cell was found to contain a void of 19557 A$3! holding 723 electrons.	at 293 K		TEMP: at 293 K COLOR: colorless "HABIT: block
FAYRAA	Ya-Qian Lan, Shun-li Li, Hai-Long Jiang, Qiang Xu	Chem.-Eur.J.	2012	(C135 H96 N18 O36 Zn8)n	catena-[bis(mu!6$-tetrakis((4-Carboxylatophenoxy)methyl)methane)-(mu!5$-tetrakis((4-carboxylatophenoxy)methyl)methane)-hexakis(mu!3$-benzotriazolyl)-octa-zinc(ii) unknown solvate]	MOF-01	colorless	C2/c	15	block	4.49	293	0.716	0.716	Disordered solvent molecules were not modelled and the disordered density was taken into account using the SQUEEZE/PLATON procedure. The unit cell was found to contain a void of 17951 A$3! holding 3880 electrons.	at 293 K	The formula for the MOF-1 framework given in the paper does not appear to charge-balance. Presumably the guest molecules (which could not be identified due to disordered) must contain additional cationic species	TEMP: at 293 K COLOR: colorless "HABIT: block
FAZPON	M.Kim, J.A.Boissonnault, C.A.Allen, P.V.Dau, S.M.Cohen	Dalton Trans.	2012	(C132 H72 Br3 N3 O39 Zn12)n,n(C1 H1 Cl3),n(C3 H7 N1 O1)	catena-[tetrakis(mu!6$-Benzene-1,3,5-tris(4-benzoato))-tris(mu!4$-2-amino-5-bromoterephthalato)-tris(mu!4$-oxo)-dodeca-zinc(ii) chloroform N,N-dimethylformamide solvate]	UMCM-1-[2,5-NH!2$Br]	colorless	P63/m	176	needle	7.13	200	0.455	0	The amine and bromo substituents of the terephthalate ligand are disordered by symmetry, with the amine moiety not being modelled from the diffraction data. Disordered chloroform and N, N-dimethylformamide solvent molecules were not modelled and the disordered density was taken into account using the SQUEEZE/PLATON procedure. The stoichiometry of the solvent molecules is not given in the paper or…			TEMP: at 200 K COLOR: colorless "HABIT: needle
FAZPUT	M.Kim, J.A.Boissonnault, C.A.Allen, P.V.Dau, S.M.Cohen	Dalton Trans.	2012	(C132 H72 Cl3 N3 O39 Zn12)n,n(C1 H1 Cl3),n(C3 H7 N1 O1)	catena-[tetrakis(mu!6$-Benzene-1,3,5-tris(4-benzoato))-tris(mu!4$-2-amino-5-chloroterephthalato)-tris(mu!4$-oxo)-dodeca-zinc(ii) chloroform N,N-dimethylformamide solvate]	UMCM-1-[2,5-NH!2$Cl]	colorless	P63/m	176	needle	9.9	200	0.66	0	The amine and chloro substituents of the terephthalate ligand are disordered by symmetry, with the amine moiety not being modelled from the diffraction data. Disordered chloroform and N,N-dimethylformamide solvent molecules were not modelled and the disordered density was taken into account using the SQUEEZE/PLATON procedure. The stoichiometry of the solvent molecules is not given in the paper or…		One of the tribenzoate ligands does not appear to have been fully modelled, with the benzoate phenyl ring missing two CH carbon atoms	TEMP: at 200 K COLOR: colorless "HABIT: needle
FAZQAA	M.Kim, J.A.Boissonnault, C.A.Allen, P.V.Dau, S.M.Cohen	Dalton Trans.	2012	(C132 H72 I3 N3 O39 Zn12)n,n(C1 H1 Cl3),n(C3 H7 N1 O1)	catena-[tetrakis(mu!6$-Benzene-1,3,5-tris(4-benzoato))-tris(mu!4$-2-amino-5-iodoterephthalato)-tris(mu!4$-oxo)-dodeca-zinc(ii) chloroform N,N-dimethylformamide solvate]	UMCM-1-[2,5-NH!2$I]	colorless	P63/m	176	needle	8.19	200	0.471	0	The amine and iodo substituents of the terephthalate ligand are disordered by symmetry, with the amine moiety not being modelled from the diffraction data. Disordered chloroform and N, N-dimethylformamide solvent molecules were not modelled and the disordered density was taken into account using the SQUEEZE/PLATON procedure. The stoichiometry of the solvent molecules is not given in the paper or …			TEMP: at 200 K COLOR: colorless "HABIT: needle
FAZQEE	M.Kim, J.A.Boissonnault, C.A.Allen, P.V.Dau, S.M.Cohen	Dalton Trans.	2012	(C132 H69 Br3 O39 Zn12)n,n(C1 H1 Cl3),n(C3 H7 N1 O1)	catena-[tetrakis(mu!6$-Benzene-1,3,5-tris(4-benzoato))-tris(mu!4$-2-bromoterephthalato)-tris(mu!4$-oxo)-dodeca-zinc(ii) chloroform N,N-dimethylformamide solvate]	UMCM-1-Br	colorless	P63/m	176	needle	7.16	200	0.447	0	The bromo substituent of the terephthalate ligand and a phenyl ring of the tribenzoate ligand are disordered by symmetry. Disordered chloroform and N,N-dimethylformamide solvent molecules were not modelled and the disordered density was taken into account using the SQUEEZE/PLATON procedure. The stoichiometry of the solvent molecules is not given in the paper or deposited cif. The unit cell was fo…			TEMP: at 200 K COLOR: colorless "HABIT: needle
FAZQII	M.Kim, J.A.Boissonnault, C.A.Allen, P.V.Dau, S.M.Cohen	Dalton Trans.	2012	(C135 H72 O45 Zn12)n,n(C1 H1 Cl3),n(C3 H7 N1 O1)	catena-[tetrakis(mu!6$-Benzene-1,3,5-tris(4-benzoato))-tris(mu!4$-1,3-benzodioxole-4,7-dicarboxylato)-tris(mu!4$-oxo)-dodeca-zinc(ii) chloroform N,N-dimethylformamide solvate]	UMCM-1-dioxole	colorless	P63/m	176	needle	6.83	200	0.433	0	The dioxole substituent of the terephthalate ligand is severely disordered, with only one oxygen atom able to be modelled from the diffraction data. Disordered chloroform and N, N-dimethylformamide solvent molecules were not modelled and the disordered density was taken into account using the SQUEEZE/PLATON procedure. The stoichiometry of the solvent molecules is not given in the paper or deposit…			TEMP: at 200 K COLOR: colorless "HABIT: needle
FAZQOO	M.Kim, J.A.Boissonnault, C.A.Allen, P.V.Dau, S.M.Cohen	Dalton Trans.	2012	(C141 H84 O42 Zn12)n,n(C1 H1 Cl3),n(C3 H7 N1 O1)	catena-[tetrakis(mu!6$-Benzene-1,3,5-tris(4-benzoato))-tris(mu!4$-2-allyloxyterephthalato)-tris(mu!4$-oxo)-dodeca-zinc(ii) chloroform N,N-dimethylformamide solvate]	UMCM-1-OAllyl	colorless	P63/m	176	needle	6.21	200	0.439	0	The tribenzoate ligands are partially disordered. The allyloxy substituent of the terephthalate ligand is severely disordered, with only the oxygen atom located from the diffraction data. Disordered chloroform and N,N-dimethylformamide solvent molecules were not modelled and the disordered density was taken into account using the SQUEEZE/PLATON procedure. The stoichiometry of the solvent molecule…			TEMP: at 200 K COLOR: colorless "HABIT: needle
FAZQUU	M.Kim, J.A.Boissonnault, C.A.Allen, P.V.Dau, S.M.Cohen	Dalton Trans.	2012	(C153 H93 B3 O48 Zn12)n,n(C1 H1 Cl3),n(C3 H7 N1 O1)	catena-[tetrakis(mu!6$-Benzene-1,3,5-tris(4-benzoato))-tris(mu!4$-2-(4-(dihydroxyboranyl)benzyloxy)terephthalato)-tris(mu!4$-oxo)-dodeca-zinc(ii) chloroform N,N-dimethylformamide solvate]	UMCM-1-OBnB(OH)!2$	colorless	P63/m	176	needle	6.53	200	0.476	0	The tribenzoate ligands are partially disordered. The (dihydroxyboranyl)benzyloxy substituent of the terephthalate ligand is severely disordered, with only the oxygen atom located from the diffraction data. Disordered chloroform and N,N-dimethylformamide solvent molecules were not modelled and the disordered density was taken into account using the SQUEEZE/PLATON procedure. The stoichiometry of t…			TEMP: at 200 K COLOR: colorless "HABIT: needle
FEFDEB	P.V.Dau, Min Kim, S.J.Garibay, F.H.L.Munch, C.E.Moore, S.M.Cohen	Inorg.Chem.	2012	(C34 H28 N2 O8 Zn2)n,6n(C4 H8 O2)	catena-(bis(mu!2$-4,4-biphenyldicarboxylato)-(mu!2$-1,4-diazabicyclo(2.2.2)octane)-di-zinc ethyl acetate solvate)		colorless	P4/mmm	123	block	6.55	200	0.933	0	The O atoms are equally disordered over two sites by symmetry. The SQUEEZE/PLATON program has been used to model some disordered solvent.			TEMP: at 200 K COLOR: colorless "HABIT: block
FEFDIF	P.V.Dau, Min Kim, S.J.Garibay, F.H.L.Munch, C.E.Moore, S.M.Cohen	Inorg.Chem.	2012	(C32 H26 N4 O8 Zn2)n,6n(C4 H8 O2)	catena-(bis(mu!2$-2-phenylpyridine-5,4'-dicarboxylato)-(mu!2$-1,4-diazabicyclo(2.2.2)octane)-di-zinc ethyl acetate solvate)		colorless	P4/mmm	123	block	21.31	200	0.945	0	The N atom of the bicyclo ligand is equally disordered over four two sites. The SQUEEZE/PLATON program has been used to model some disordered solvent.			TEMP: at 200 K COLOR: colorless "HABIT: block
FEFFED	Xiao-Min Liu, Rui-Biao Lin, Jie-Peng Zhang, Xiao-Ming Chen	Inorg.Chem.	2012	(C28 H24 Br2 Co2 N8 O4)n	catena-((mu!2$-Terephthalato)-bis(mu!2$-4,4'-hydrazine-1,2-diyldipyridine)-dibromo-di-cobalt)		blue	P21/n	14	block	5.32	93	0.99	0.99	The SQUEEZE/PLATON program has been used to model some disorder.			TEMP: at 93 K COLOR: blue "HABIT: block
FEHCOM	Chun-Ting He, Jing-Yu Tian, Si-Yang Liu, Gangfeng Ouyang, Jie-Peng Zhang, Xiao-Ming Chen	Chemical Science	2013	(C24 H20 N4 O4 Zn2)n	catena-(bis(mu!4$-4-(3,5-Dimethyl-1H-pyrazol-4-yl)benzoato)-di-zinc)		colorless	Ibca	73	block	5.38	293	0.954	0.954		at 293 K	We calculate 25% void space in the structure	TEMP: at 293 K COLOR: colorless "HABIT: block
FEQSIF	Wenjuan Zhuang, Daqiang Yuan, Jian-Rong Li, Zhiping Luo, Hong-Cai Zhou, S.Bashir, Jingbo Liu	Adv. Healthcare Mater.	2012	(C37 H40 Co4 O30)n	catena-((mu!12$-5-(3-(3,5-Dicarboxyphenoxy)-2,2-bis((3,5-dicarboxyphenoxy)methyl)propoxy)isophthalato)-bis(mu!2$-aqua)-tetra-cobalt)		red	P-421m	113	prism	5.98	110	0.879	0.879	The SQUEEZE/PLATON program has been used to model some disorder.	synchrotron radiation		COLOR: red HABIT: prism
FEVFUJ	M.Grzywa, C.Gessner, D.Denysenko, B.Bredenkotter, F.Gschwind, K.M.Fromm, W.Nitek, E.Klemm, D.Volkmer	Dalton Trans.	2013	(C90 H60 Cu6 N12)n	catena-[tris(mu!4$-3,3',5,5'-tetraphenyl-1H,1'H-4,4'-bipyrazolato)-hexa-copper unknown solvate]		colorless	I41/a	88	block	4.55	200	0.806	0.806	Disordered solvent molecules were not modelled and the disordered density was taken into account using the SQUEEZE/PLATON procedure.			TEMP: at 200 K COLOR: colorless "HABIT: block
FEWXAI	S.M.Neville, G.J.Halder, K.S.Murray, B.Moubaraki, C.J.Kepert	Aust.J.Chem.	2013	(C78 H48 Fe3 N30 S6)n	catena-[tetrakis(mu!3$-2,4,6-tris(4'-pyridyl)-1,3,5-triazine)-hexakis(isothiocyanato)-tri-iron]		dark red	Fm-3m	225	cubeoctahedron	32.86	375	0.417	0.417	C1,S1 disordered by symmetry over two sites with occupancy 0.50.			TEMP: 375 K COLOR: dark red "HABIT: cubeoctahedron
FEWXEM	S.M.Neville, G.J.Halder, K.S.Murray, B.Moubaraki, C.J.Kepert	Aust.J.Chem.	2013	(C78 H48 Fe3 N30 S6)n,n(C1 H4 O1),n(C3 H6 O1)	catena-[tetrakis(mu!3$-2,4,6-tris(4'-pyridyl)-1,3,5-triazine)-hexakis(isothiocyanato)-tri-iron acetone methanol solvate]		dark red	Fm-3m	225	cubeoctahedron	21.47	150	0.884	0	The structure is disordered by symmetry. Disordered solvent molecules were not modelled and the disordered density was taken into account using the SQUEEZE/PLATON procedure.			TEMP: 150 K COLOR: dark red "HABIT: cubeoctahedron
FEWXIQ	S.M.Neville, G.J.Halder, K.S.Murray, B.Moubaraki, C.J.Kepert	Aust.J.Chem.	2013	(C78 H48 Fe3 N30 S6)n,3n(C7 H8 O1),3n(C3 H6 O1)	catena-[tetrakis(mu!3$-2,4,6-tris(4'-pyridyl)-1,3,5-triazine)-hexakis(isothiocyanato)-tri-iron acetone phenylmethanol solvate]		dark red	Fm-3m	225	cubeoctahedron	29.78	310	0.539	0	The structure is disordered by symmetry.			TEMP: 310 K COLOR: dark red "HABIT: cubeoctahedron
FIBKEI	Yangyang Liu, Jian-Rong Li, W.M.Verdegaal, Tian-Fu Liu, Hong-Cai Zhou	Chem.-Eur.J.	2013	(C63 H39 Cu6 N3 O30)n	catena-(tris(mu!8$-5,5'-(Pyridine-3,5-diyl)di-isophthalato)-hexa-aqua-hexa-copper unknown solvate)			Cmcm	63		6.22	110	0.738	0.733	The pyridine moiety of one of the ligands is disordered by symmetry. The SQUEEZE/PLATON program was used to model the unidentified disordered solvent.			TEMP: at 110 K
FIDRIV	Yongwu Peng, Tengfei Gong, Yong Cui	Chem.Commun.	2013	(C38 H42 Dy1 Na1 O14)n,6n(H2 O1)	catena-[(mu!8$-5',5''-Di-t-butyl-4',6''-dihydroxy-2',2''-dimethyl-1,1':3',1'':3'',1'''-quaterphenyl-3,3''',5,5'''-tetracarboxylato)-tetra-aqua-dysprosium(iii)-sodium(i) unknown solvate hexahydrate]		pale yellow	P4122	91	block	8.14	123	0.851	0	The paper states disordered solvent molecules were not modelled and the disordered density was taken into account using the SQUEEZE/PLATON procedure. Elemental analysis showed that the formula unit of 1 includes six water guest molecules. No further details regarding disordered solvent are given. We calculate the structure contains 59% void space.			TEMP: at 123 K COLOR: pale yellow "HABIT: block
FIFFUX	J.E.Mondloch, W.Bury, D.Fairen-Jimenez, S.Kwon, E.J.DeMarco, M.H.Weston, A.A.Sarjeant, S.T.Nguyen, P.C.Stair, R.Q.Snurr, O.K.Farha, J.T.Hupp	J.Am.Chem.Soc.	2013	(C44 H22 O16 Zr3)n	catena-[(mu!8$-4,4',4'',4'''-Pyrene-1,3,6,8-tetrayltetrabenzoato)-bis(mu!3$-oxo)-bis(mu!2$-oxo)-tetraoxo-tri-zirconium]	NU-1000	yellow	P6/mmm	191	block	12.16	100	0.486	0.486	The structure is disordered.			TEMP: 100.0 K COLOR: yellow "HABIT: block
FIFGEI	Shou-Tian Zheng, Xiang Zhao, S.Lau, A.Fuhr, Pingyun Feng, Xianhui Bu	J.Am.Chem.Soc.	2013	(C42 H30 In3 O16 1+)n,n(N1 O3 1-)	catena-[tris(mu!4$-Biphenyl-4,4'-dicarboxylato)-(mu!3$-oxo)-triaqua-tri-indium nitrate unknown solvate]	CPM-30		P-31c	163		2.96	296	0.457	0	Disordered nitrate anion and unknown solvent molecules were not modelled and the disordered density was taken into account using the SQUEEZE/PLATON procedure.	at 296 K		TEMP: at 296 K
FIFGIM	Shou-Tian Zheng, Xiang Zhao, S.Lau, A.Fuhr, Pingyun Feng, Xianhui Bu	J.Am.Chem.Soc.	2013	(C60 H40 In3 N3 O21 Zn2)n	catena-[tris(mu!4$-Biphenyl-4,4'-dicarboxylato)-tris(mu!3$-isonicotinato)-(mu!3$-oxo)-diaqua-tri-indium-di-zinc unknown solvate]	CPM-31		P-31c	163		3.81	296	0.701	0	The structure is disordered.	at 296 K		TEMP: at 296 K
FIFGOS	Shou-Tian Zheng, Xiang Zhao, S.Lau, A.Fuhr, Pingyun Feng, Xianhui Bu	J.Am.Chem.Soc.	2013	(C60 H37 Co2 In3 N3 O20 1+)n,n(N1 O3 1-),2n(H2 O1)	catena-[tris(mu!4$-Biphenyl-4,4'-dicarboxylato)-tris(mu!3$-isonicotinato)-(mu!3$-oxo)-(mu!2$-hydroxo)-di-cobalt-tri-indium nitrate unknown solvate dihydrate]	CPM-32		P-31c	163		5.76	296	0.733	0	The structure is disordered. Disordered nitrate anion and solvent molecules were not modelled and the disordered density was taken into account using the SQUEEZE/PLATON procedure.	at 296 K		TEMP: at 296 K
FIHHUB	Lian Zhou, Yun-Shan Xue, Yan Xu, Jun Zhang, Hong-Bin Du	CrystEngComm	2013	(C32 H27 B1 Cd1 F2 N4 O4)n,1.5n(C3 H7 N1 O1),n(H2 O1)	catena-((mu!3$-Benzene-1,4-dicarboxylato)-(mu!2$-4,4-difluoro-1,3,5,7,8-pentamethyl-2,6-bis(4-pyridyl)-3a,4a-diaza-4-bora-s-indacene)-cadmium dimethylformamide monohydrate clathrate)		black	P6/m	175	block	5.85	291	0.735	0.62	The SQUEEZE/PLATON program was used to model the disordered guest molecules.	at 291 K		TEMP: at 291 K COLOR: black "HABIT: block
FIPGOB	Xin Shi, Guangshan Zhu, Xiaohui Wang, Guanghua Li, Qianrong Fang, GangWu, Ge Tian, Ming Xue, Xiaojun Zhao, Renwei Wang, Shilun Qiu	Cryst.Growth Des.	2005	(C38 H24 Cd1 N4 O4)n,2n(H2 O1)	catena-((mu!2$-1,1'-Biphenyl-4,4'-dicarboxylato)-bis(1,10-phenanthroline)-cadmium dihydrate)		colorless	Cc	9	block	4.43	293	0.772	0.772		at 293 K	our program suggests z may be 4 giving dx 1.545, rather than 2 and 0.772 as published	TEMP: at 293 K REINT-SEE: for re-interpretation of space group as C2/c see [FIPGOB01]
FIRCIS01	C.Merz, M.Desciak, C.O'Brien, R.L.LaDuca, R.C.Finn, R.S.Rarig, J.A.Zubieta	Inorg.Chim.Acta	2004	(C26 H24 Co1 N6 S2)n	catena-(bis(mu!2$-1,2-bis(4-Pyridyl)ethane)-bis(isothiocyanato)-cobalt(ii))			C2/c	15		2.8	293	0.684	0.684		at 293 K		TEMP: at 293 K
FIRMUQ	Da-Shuai Zhang, Ze Chang, Yi-Fan Li, Zhong-Yi Jiang, Zhi-Hong Xuan, Ying-Hui Zhang, Jian-Rong Li, Qiang Chen, Tong-Liang Hu, Xian-He Bu	Scientific Reports	2013	(C26 H14 F4 N6 Ni1 O5)n	catena-[(mu!3$-2,4,6-Tri(pyridin-4-yl)-1,3,5-triazine)-(mu!2$-3,4,5,6-tetrafluorophthalato)-aqua-nickel unknown solvate]		green	P3121	152	block	2.77	113	0.828	0.825	Disordered solvent molecules were not modelled and the disordered density was taken into account using the SQUEEZE/PLATON procedure.			TEMP: at 113 K COLOR: green "HABIT: block
FIRNAX	Da-Shuai Zhang, Ze Chang, Yi-Fan Li, Zhong-Yi Jiang, Zhi-Hong Xuan, Ying-Hui Zhang, Jian-Rong Li, Qiang Chen, Tong-Liang Hu, Xian-He Bu	Scientific Reports	2013	(C26 H16 F2 N6 Ni1 O5)n	catena-[(mu!3$-2,4,6-Tri(pyridin-4-yl)-1,3,5-triazine)-(mu!2$-3,6-difluorophthalato)-aqua-nickel unknown solvate]		green	P3121	152	block	5.2	293	0.751	0.749	Disordered solvent molecules were not modelled and the disordered density was taken into account using the SQUEEZE/PLATON procedure.	at 293 K		TEMP: at 293 K COLOR: green "HABIT: block
FIRNAX01	Da-Shuai Zhang, Ze Chang, Yi-Fan Li, Zhong-Yi Jiang, Zhi-Hong Xuan, Ying-Hui Zhang, Jian-Rong Li, Qiang Chen, Tong-Liang Hu, Xian-He Bu	Scientific Reports	2013	(C26 H16 F2 N6 Ni1 O5)n	catena-[(mu!3$-2,4,6-Tri(pyridin-4-yl)-1,3,5-triazine)-(mu!2$-3,6-difluorophthalato)-aqua-nickel unknown solvate]		green	P3121	152	block	4.54	293	0.741	0	Disordered solvent molecules were not modelled and the disordered density was taken into account using the SQUEEZE/PLATON procedure.	at 293 K		TEMP: at 293 K COLOR: green "HABIT: block
FIRNIF	Da-Shuai Zhang, Ze Chang, Yi-Fan Li, Zhong-Yi Jiang, Zhi-Hong Xuan, Ying-Hui Zhang, Jian-Rong Li, Qiang Chen, Tong-Liang Hu, Xian-He Bu	Scientific Reports	2013	(C26 H16 F2 N6 Ni1 O5)n	catena-[(mu!3$-2,4,6-Tri(pyridin-4-yl)-1,3,5-triazine)-(mu!2$-4,5-difluorophthalato)-aqua-nickel unknown solvate]		green	P3221	154	block	5.69	293	0.737	0	Disordered solvent molecules were not modelled and the disordered density was taken into account using the SQUEEZE/PLATON procedure.	at 293 K		TEMP: at 293 K COLOR: green "HABIT: block
FIRNOL	Da-Shuai Zhang, Ze Chang, Yi-Fan Li, Zhong-Yi Jiang, Zhi-Hong Xuan, Ying-Hui Zhang, Jian-Rong Li, Qiang Chen, Tong-Liang Hu, Xian-He Bu	Scientific Reports	2013	(C26 H16 N8 Ni1 O9)n	catena-[(mu!3$-2,4,6-Tri(pyridin-4-yl)-1,3,5-triazine)-(mu!2$-4,5-dinitrophthalato)-aqua-nickel unknown solvate]		green	P3221	154	block	7.63	293	0.818	0	Disordered solvent molecules were not modelled and the disordered density was taken into account using the SQUEEZE/PLATON procedure.	at 293 K		TEMP: at 293 K COLOR: green "HABIT: block
FIRNUR	Da-Shuai Zhang, Ze Chang, Yi-Fan Li, Zhong-Yi Jiang, Zhi-Hong Xuan, Ying-Hui Zhang, Jian-Rong Li, Qiang Chen, Tong-Liang Hu, Xian-He Bu	Scientific Reports	2013	(C26 H20 N8 Ni1 O5)n	catena-[(mu!3$-2,4,6-Tri(pyridin-4-yl)-1,3,5-triazine)-(mu!2$-4,5-diaminophthalato)-aqua-nickel unknown solvate]		green	P3221	154	block	9.41	293	0.737	0.714	Disordered solvent molecules were not modelled and the disordered density was taken into account using the SQUEEZE/PLATON procedure.	at 293 K		TEMP: at 293 K COLOR: green "HABIT: block
FIRPAZ	Da-Shuai Zhang, Ze Chang, Yi-Fan Li, Zhong-Yi Jiang, Zhi-Hong Xuan, Ying-Hui Zhang, Jian-Rong Li, Qiang Chen, Tong-Liang Hu, Xian-He Bu	Scientific Reports	2013	(C26 H18 N6 Ni1 O5)n	catena-[(mu!3$-2,4,6-Tri(pyridin-4-yl)-1,3,5-triazine)-(mu!2$-phthalato)-aqua-nickel unknown solvate]		green	P3221	154	block	6.65	293	0.697	0	Disordered solvent molecules were not modelled and the disordered density was taken into account using the SQUEEZE/PLATON procedure.	at 293 K		TEMP: at 293 K COLOR: green "HABIT: block
FISGOF	Jianfeng Cai, Xingtang Rao, Yabing He, Jancan Yu, Chuande Wu, Wei Zhou, T.Yildirim, Banglin Chen, Guodong Qian	Chem.Commun.	2014	(C30 H18 Cu2 O10)n,n(C5 H11 N1 O1),n(H2 O1)	catena-[(mu!8$-5'-((3,5-dicarboxylatophenyl)ethynyl)-1,1':3',1''-terphenyl-4,4''-dicarboxylato)-diaqua-di-copper N,N-diethylformamide solvate hydrate]		blue	R3m	160	block	6.65	293	0.541	0	Disordered solvent molecules were not modelled and the disordered density was taken into account using the SQUEEZE/PLATON procedure.	at 293 K		TEMP: at 293 K COLOR: blue "HABIT: block
FISXEM	Ming-Jie Dong, Min Zhao, Sha Ou, Chao Zou, Chuan-De Wu	Angew.Chem.,Int.Ed.	2014	(C10 H8 Cd1 O5)n	catena-[(mu!5$-4-(2-Carboxylatoethenyl)benzoato)-aqua-cadmium(ii) unknown solvate]	CZJ-3	colorless	P6522	179	block	3.81	293	0.802	0.802	The benzoate ligand is disordered by symmetry. Disordered solvent molecules were not modelled and the disordered density was taken into account using the SQUEEZE/PLATON procedure. The unit cell was found to contain a void of 2544 A$3! holding 361 electrons.	at 293 K		TEMP: at 293 K COLOR: colorless "HABIT: block
FIZPUB	Nian Zhao, Fuxing Sun, Hongming He, Jiangtao Jia, Guangshan Zhu	Cryst.Growth Des.	2014	(C48 H26 O22 Zn4)n	catena-[(mu!14$-5,5',5'',5'''-(1,3a-dihydropyrene-1,3,6,8-tetrayl)tetrabenzene-1,3-dicarboxylato)-dioxo-tetraaqua-tetra-zinc unknown solvate]			P21/c	14		5.59	293	0.843	0.837	Disordered solvent molecules were not modelled and the disordered density was taken into account using the SQUEEZE/PLATON procedure.	at 293 K		TEMP: at 293 K
FIZQAI	Nian Zhao, Fuxing Sun, Hongming He, Jiangtao Jia, Guangshan Zhu	Cryst.Growth Des.	2014	(C48 H30 Cu4 O22)n	catena-[(mu!14$-5,5',5'',5'''-(1,3a-dihydropyrene-1,3,6,8-tetrayl)tetrabenzene-1,3-dicarboxylato)-hexaaqua-tetra-copper unknown solvate]			P21/c	14		5.18	293	0.864	0	Disordered solvent molecules were not modelled and the disordered density was taken into account using the SQUEEZE/PLATON procedure.	at 293 K		TEMP: at 293 K
FOJLOH	P.Vishnoi, R.Murugavel	Z.Anorg.Allg.Chem.	2014	(C33 H30 O10 Zn1)n	catena-[(mu!3$-hydrogen 4,4',4''-((2,4,6-trimethylbenzene-1,3,5-triyl)tris(methyleneoxy))tribenzoato)-aqua-zinc unknown solvate]		colorless	C2/c	15	block	9.2	150	0.846	0.846	Disordered solvent molecules were not modelled and the disordered density was taken into account using the SQUEEZE/PLATON procedure.			TEMP: at 150 K COLOR: colorless "HABIT: block
FOJWOS	Guoqi Zhang, E.C.Constable, C.E.Housecroft, J.A.Zampese	Inorg.Chem.Commun.	2014	(C22 H24 Cu1 N2 O6)n	catena-((mu!3$-3,3'-(Cyclohexane-1,2-diylbis(iminomethylene))bis(4-oxybenzoic acid))-copper unknown solvate)		blue	P42212	94	block	4.31	173	0.798	0.798	The SQUEEZE/PLATON program was used to model some disordered solvent.	absolute configuration		TEMP: at 173 K ABS-CONFIG: absolute configuration
FORKOO	Jian-Jun Liu, Yu-Jian Hong, Ying-Fang Guan, Mei-Jin Lin, Chang-Cang Huang, Wen-Xin Dai	Dalton Trans.	2015	(C48 H24 F6 N8 O8 Si1 Zn1)n	catena-((mu!2$-Hexafluorosilcate-F,F')-bis(mu!2$-2,7-bis(pyridin-4-yl)benzo(lmn)(3,8)phenanthroline-1,3,6,8(2H,7H)-tetrone)-zinc unknown solvate)		yellow	P4/mmm	123	block	6.41	113	0.603	0.596	The structure is disordered by symmetry. The SQUEEZE/PLATON program has been used to model some disordered solvent.			TEMP: 113 K COLOR: yellow "HABIT: block "SENS: Light-sensitive
FORKUU	Jian-Jun Liu, Yu-Jian Hong, Ying-Fang Guan, Mei-Jin Lin, Chang-Cang Huang, Wen-Xin Dai	Dalton Trans.	2015	(C48 H24 F6 N8 O8 Si1 Zn1)n,0.82(I2)	catena-((mu!2$-Hexafluorosilcate-F,F')-bis(mu!2$-2,7-bis(pyridin-4-yl)benzo(lmn)(3,8)phenanthroline-1,3,6,8(2H,7H)-tetrone)-zinc di-iodine unknown solvate)		red	P4/mmm	123	block	10.88	113	0.716	0.716	I1 disordered by symmetry over two configurations with occupancy 0.205. The SQUEEZE/PLATON program has been used to model some disorder.			TEMP: 113 K COLOR: red "HABIT: block
FORXAM	Hyungphil Chun, Heejin Jung, Jinwoo Seo	Inorg.Chem.	2009	(C38 H32 N2 O18 Zn4)n	catena-[tetrakis(mu!4$-Benzene-1,3-dicarboxylato-O,O',O'',O''')-(mu!2$-1,4-diazabicyclo[2.2.2]octane-N,N')-diaqua-tetra-zinc(ii) unknown solvate]	catena-[tetrakis(mu!4$-Isophthalato-O,O',O'',O''')-(mu!2$-dabco-N,N')-diaqua-tetra-zinc(ii) unknown solvate]	colorless	Fm-3m	225	cut tetrahedral	6.18	173	0.667	0.667	The DABCO ligand is disordered by symmetry. The isophthalate ligand is also partially disordered, with two of the four independent carbon atoms modelled over two sites of equal occupancy. The framework contains large voids occupied by disordered solvents. We calculate the structure contains 59% void space. The SQUEEZE/PLATON routine was used to model 11117.6 electrons from a void of 42516 A$3!. N…			TEMP: at 173 K COLOR: colorless "HABIT: cut tetrahedral "ISO: Isostructural with the Co(ii) analogue
FORXEQ	Hyungphil Chun, Heejin Jung, Jinwoo Seo	Inorg.Chem.	2009	(C38 H32 Co4 N2 O18)n	catena-[tetrakis(mu!4$-Benzene-1,3-dicarboxylato-O,O',O'',O''')-(mu!2$-1,4-diazabicyclo[2.2.2]octane-N,N')-diaqua-tetra-cobalt(ii) unknown solvate]	catena-[tetrakis(mu!4$-Isophthalato-O,O',O'',O''')-(mu!2$-dabco-N,N')-diaqua-tetra-cobalt(ii) unknown solvate]	green-blue	Fm-3m	225	cut tetrahedral	7.02	90	0.663	0.663	The DABCO ligand is disordered by symmetry. The isophthalate ligand is also disordered, with two of the four independent carbon atoms modelled over two sites of equal occupancy. The water ligand is disordered over three sites with occupancies 0.40:0.30:0.30. The framework contains large voids (we calculate 61% void space) occupied by disordered solvents. The SQUEEZE/PLATON routine was used to mod…	synchrotron radiation		TEMP: at 90 K RADIATION: synchrotron radiation
FORXIU	Hyungphil Chun, Heejin Jung, Jinwoo Seo	Inorg.Chem.	2009	(C54 H40 N2 O18 Zn4)n	catena-[tetrakis(mu!4$-Naphthalene-2,7-dicarboxylato-O,O',O'',O''')-(mu!2$-1,4-diazabicyclo[2.2.2]octane-N,N')-diaqua-tetra-zinc(ii) unknown solvate]		colorless	Fm-3m	225	cut tetrahedral	6.07	173	0.498	0.498	The DABCO ligand is disordered by symmetry. The framework contains large voids (we calculate 61% void space) occupied by disordered solvent molecules. The SQUEEZE/PLATON routine was used to model 18819 electrons from a void of 78556 A$3!. No further details have been given, however the synthetic route used suggests chloroform and dimethylformamide may be present.			TEMP: at 173 K COLOR: colorless "HABIT: cut tetrahedral
FOSTIS	Eun-Young Cho, Ja-Min Gu, In-Hwan Choi, Wan-Seok Kim, Yong-Kyung Hwang, Seong Huh, Sung-Jin Kim, Youngmee Kim	Cryst.Growth Des.	2014	(C216 H120 In6 O48 6-)n,6n(C4 H12 N1 1+),20n(C5 H11 N1 O1),28n(H2 O1)	catena-(hexakis(Diethylammonium) octakis(mu!3$-1,3,5-tris(4-carboxylatophenyl)benzene)-hexa-indium diethylformamide solvate octacosahydrate)		colorless	R-3	148	block	6.08	296	0.988	0.575	The SQUEEZE/PLATON program was used to model the disordered cations and solvent molecules.	at 296 K		TEMP: at 296 K COLOR: colorless "HABIT: block
FOTNIN	Dawei Feng, Kecheng Wang, Jie Su, Tian-Fu Liu, Jihye Park, Zhangwen Wei, M.Bosch, A.Yakovenko, Xiaodong Zou, Hong-Cai Zhou	Angew.Chem.,Int.Ed.	2015	(C48 H46 N6 O32 Zr6)n,90(H2 O1)	catena-[bis(mu-4,4',4''-s-triazine-2,4,6-triyl-tribenzoato)-tetrakis(mu-hydroxo)-tetrakis(mu-oxo)-hexakis(hydroxo)-hexa-aqua-hexa-zirconium nonacontahydrate]	PCN-777	colorless	F-43m	216	Octahedron	3.95	298	0.525	0		298 K	Simulated structure refined with powder data	TEMP: 298 K COLOR: colorless "HABIT: Octahedron "SOURCE-CHEM:
FUNBEW	O.K.Farha, C.D.Malliakas, M.G.Kanatzidis, J.T.Hupp	J.Am.Chem.Soc.	2010	(C44 H24 Br2 N2 O8 Zn2)n,n(C3 H7 N1 O1)	catena-((mu!8$-4,4',4'',4'''-(3,6-dibromobenzene-1,2,4,5-tetrayl)tetrabenzoato)-(mu!2$-4,4'-bipyridine)-di-zinc(ii) N,N-dimethylformamide solvate)		yellow	Pmmm	47	plate	4.87	100	0.718	0	The SQUEEZE/PLATON program has been used to model disordered solvent molecules and accounts for 434 electrons per unit cell.		The exact number of solvent molecules per unit cell has not been published	TEMP: at 100 K COLOR: yellow "HABIT: plate
FUNBOG	O.K.Farha, C.D.Malliakas, M.G.Kanatzidis, J.T.Hupp	J.Am.Chem.Soc.	2010	(C44 H24 Br2 N4 O8 Zn2)n,n(C3 H7 N1 O1)	catena-((mu!8$-4,4',4'',4'''-(3,6-dibromobenzene-1,2,4,5-tetrayl)tetrabenzoato)-(mu!2$-4,4'-diazene-1,2-diyldipyridine)-di-zinc(ii) N,N-dimethylformamide solvate)			P2/m	10		9.56	100	0.623	0	The SQUEEZE/PLATON program has been used to model disordered solvent molecules and accounts for 685 electrons per unit cell.		The exact number of solvent molecules per unit cell has not been published	TEMP: at 100 K
FUNCEX	O.K.Farha, C.D.Malliakas, M.G.Kanatzidis, J.T.Hupp	J.Am.Chem.Soc.	2010	(C46 H24 Br2 N6 O8 Zn2)n,n(C3 H7 N1 O1)	catena-((mu!8$-4,4',4'',4'''-(3,6-dibromobenzene-1,2,4,5-tetrayl)tetrabenzoato)-(mu!2$-3,6-bis(pyridin-4-yl)-1,2,4,5-tetrazine)-di-zinc(ii) N,N-dimethylformamide solvate)			P2/m	10		10.96	100	0.581	0	The SQUEEZE/PLATON program has been used to model disordered solvent molecules and accounts for 751 electrons.		The exact number of solvent molecules per unit cell has not been published	TEMP: at 100 K
FUNCIB	O.K.Farha, C.D.Malliakas, M.G.Kanatzidis, J.T.Hupp	J.Am.Chem.Soc.	2010	(C58 H28 Br2 N4 O12 Zn2)n,n(C3 H7 N1 O1)	catena-((mu!8$-4,4',4'',4'''-(3,6-dibromobenzene-1,2,4,5-tetrayl)tetrabenzoato)-(mu!2$-2,7-bis(pyridin-4-yl)-3a,5a,10b,10c-tetrahydrobenzo[lmn][3,8]phenanthroline-1,3,6,8(2H,7H)-tetrone)-di-zinc(ii) N,N-dimethylformamide solvate)		yellow	Pmmm	47	plate	9.06	100	0.595	0	The 2,7-bis(pyridin-4-yl)-3a,5a,10b,10c- tetrahydrobenzo[lmn][3,8]phenanthroline-1,3,6,8(2H,7H)-tetrone ligands are disordered by symmetry. The SQUEEZE/PLATON program has been used to model the disordered solvent molecules and accounts for 784 electrons per unit cell.		The exact number of solvent molecules per unit cell has not been published	TEMP: at 100 K COLOR: yellow "HABIT: plate
FUNFOL	Zhenzhen Shi, Zhaorui Pan, Chuanlei Zhang, Hegen Zheng	Dalton Trans.	2015	(C66 H46 Co3 N20 O14)n,4n(H2 O1)	catena-(bis(mu!4$-Benzene-1,3,5-tricarboxylato)-bis(mu!3$-4-(1H-1,2,4-triazol-1-yl)-N,N-bis(4-(1H-1,2,4-triazol-1-yl)phenyl)aniline)-diaqua-tri-cobalt unknown solvate tetrahydrate)		purple	P-1	2	clock	5.13	293	0.927	0.927	The SQUEEZE/PLATON program has been used to model some disorder.	293 K		TEMP: 293 K COLOR: purple "HABIT: clock
FUTTIZ	Hyungphil Chun, Woojeong Bak, Keunil Hong, Dohyun Moon	Cryst.Growth Des.	2014	(C2 H8 N1 1+)2n,n(C60 H48 N4 O30 Zn5 2-)	catena-[bis(Dimethylammonium) hexakis(mu!2$-2-hydroxyterephthalato)-bis(mu!2$-1,4-diazabicyclo[2.2.2]octane)-penta-zinc unknown solvate]		colorless	Pa-3	205	Octahedral	7.09	100	0.738	0.738	Disordered solvent molecules were not modelled and the disordered density was taken into account using the SQUEEZE/PLATON procedure. The unit cell was found to contain a void of 8284 A$3! holding 619 electrons.	synchrotron		TEMP: 100 K RADIATION: synchrotron
FUTTOF	Hyungphil Chun, Woojeong Bak, Keunil Hong, Dohyun Moon	Cryst.Growth Des.	2014	(C2 H8 N1 1+)2n,n(C30 H24 N2 O18 Zn2 2-)	catena-[bis(Dimethylammonium) (mu!2$-1,4-diazabicyclo[2.2.2]octane)-tris(mu!2$-2,5-dihydroxyterephthalato)-di-zinc unknown solvate]		colorless	P63/m	176	hexagonal block	11.21	100	0.541	0.541	Disordered solvent molecules were not modelled and the disordered density was taken into account using the SQUEEZE/PLATON procedure. The unit cell was found to contain a void of 4417 A$3! holding 93 electrons.	synchrotron		TEMP: 100 K RADIATION: synchrotron
FUWQIZ	Jianfeng Cai, Huizhen Wang, Hailong Wang, Xing Duan, Zhiyu Wang, Yuanjing Cui, Yu Yang, Banglin Chen, Guodong Qian	RSC Advances	2015	(C22 H15 Cu2 N1 O10)n	catena-[(mu-2'-amino-1,1':4',1''-terphenyl-3,3'',5,5''-tetracarboxylato)-di-aqua-di-copper]	ZJU-8	blue	R-3m	166	block	4.51	293	0.747	0.738	C4B,C6C,N10 disordered by symmetry over two configurations with occupancies 0.5,0.5,0.25.	293 K		TEMP: 293 K COLOR: blue "HABIT: block
FUXXED	Zhen Zhou, Cheng He, Jinghai Xiu, Lu Yang, Chunying Duan	J.Am.Chem.Soc.	2015	(C33 H31 N1 Ni2 O13)n	catena-[(mu-4,4',4'',4'''-(ethene-1,1,2,2-tetrayl)tetrabenzoato)-(mu-aqua)-triaqua-(N,N-dimethylformamide)-di-nickel unknown solvate]		green	P-3	147	block	7.29	220	0.848	0.848	C31,C32,C33,N1 and C31',C32',C33',N1' disordered over two sites with occupancies 0.50:0.50; The SQUEEZE/PLATON program has been used to model some disorder.			TEMP: 220 K COLOR: green "HABIT: block
FUXXIH	Zhen Zhou, Cheng He, Jinghai Xiu, Lu Yang, Chunying Duan	J.Am.Chem.Soc.	2015	(C70 H70 N2 Ni6 O32)n	catena-[bis(mu-4,4',4'',4'''-(ethene-1,1,2,2-tetrayl)tetrabenzoato)-bis(mu-L-proline)-hexakis(mu-aqua)-hexa-aqua-hexa-nickel unknown solvate]		green	C2	5	needle	7.82	220	0.957	0.957	The SQUEEZE/PLATON program has been used to model some disorder.			TEMP: 220 K COLOR: green "HABIT: needle
FUYCAE	Lei Hou, Wei-Xiong Zhang, Jie-Peng Zhang, Wei Xue, Yue-BiaoZhang, Xiao-Ming Chen	Chem.Commun.	2010	(C48 H34 Co4 N4 O16 S1)n	catena-((mu!6$-sulfato)-bis(mu!5$-2,6-bis(p-carboxyphenyl)-4,4'-bipyridine)-bis(mu!3$-hydroxo)-diaqua-tetra-cobalt)		red	P42/nmc	137	block	5.85	150	0.762	0.762	C12,C13 and C12',C13' disordered by symmetry over two sites with occupancies 0.50:0.50. The SQUEEZE/PLATON program has been used to model some disorder.			TEMP: at 150 K COLOR: red "HABIT: block
FUYCIN	N.T.T.Nguyen, H.Furukawa, F.Gandara, C.A.Trickett, Hyung Mo Jeong, K.E.Cordova, O.M.Yaghi	J.Am.Chem.Soc.	2015	(C18 H6 O6 V1 2-)n,2(C2 H8 N1 1+),2(H2 O1)	catena-[bis(dimethylammonium) (mu-triphenylene-2,3,6,7,10,11-hexolato)-vanadium dihydrate]			P4332	212		5.85	0	0.589	0.581
FUYCOT	Shi-Yuan Zhang, Dan Li, Dong Guo, Hui Zhang, Wei Shi, Peng Cheng, L.Wojtas, M.J.Zaworotko	J.Am.Chem.Soc.	2015	(C48 H24 O26 Zn8)n	catena-[hexakis(mu-terephthalato)-bis(mu-oxido)-octa-zinc unknown solvate]	delta-CMOF-5		P213	198	block	7.29	100	0.628	0.628	C10B,C11B,C12B,C13B,C14B,C15B,C16B,C17B,O5B,O6B,O7B and C10A,C11A,C12A,C13A,C14A,C15A,C16A,C17A,O5A,O6A,O7A disordered over two sites with occupancies 0.71:0.29. Disordered solvent molecules were not modelled and the disordered density was taken into account using the SQUEEZE/PLATON procedure.			TEMP: 100 K STEREOMER: for stereoisomer see [FUYCUZ]
FUYCUZ	Shi-Yuan Zhang, Dan Li, Dong Guo, Hui Zhang, Wei Shi, Peng Cheng, L.Wojtas, M.J.Zaworotko	J.Am.Chem.Soc.	2015	(C48 H24 O26 Zn8)n	catena-[hexakis(mu-terephthalato)-bis(mu-oxido)-octa-zinc unknown solvate]	lambda-CMOF-5		P213	198	block	9.56	100	0.626	0.767	Unidentified disordered solvent molecules have been modelled as partial occupancy oxygen atoms.			TEMP: 100 K STEREOMER: for stereoisomer see [FUYCOT]
FUZVUT02	Meng Li, Jin Yang, Ying-Ying Liu, Jian-Fang Ma	Dyes Pigm.	2015	(C82 H68 N6 O20 Zn3)n	catena-[tris(mu-2,2'-(1,1'-binaphthalene-2,2'-diylbis(oxy))diacetato)-(mu-1,1'-hexane-1,6-diylbis(1H-1,2,4-triazole))-diaqua-tri-zinc]		colorless	P2	3	needle	10.88	293	0.929	0.929		twin; 293 K	We calculate 44.07% void space in the structure	TEMP: 293 K OTHER-DIFF: twin
GACBIY	???	CSD Communication(Private Communication)	2016	(C23 H14 Cu2 O12)n	catena-[(mu-2$4!-carboxy(1$1!,2$1!:2$3!,3$1!-terphenyl)-1$3!,1$5!,3$3!,3$5!-tetracarboxylato)-diaqua-di-copper unknown solvate]		blue	P63/mmc	194	block	6.13	293	0.893	0.893	H8 and C10,O3,O4 disordered over two sites with occupancies 0.25:0.25; Disordered solvent molecules were not modelled and the disordered density was taken into account using the SQUEEZE/PLATON procedure.	293 K		COLOR: blue HABIT: block
GADHOL	Le Zhang, Xue Feng Feng, Pan Pan Meng, Le Le Gong, Feng Luo	CrystEngComm	2016	(C62 H42 N14 O12 Zn2)n	catena-(bis(mu!2$-4-((4-Carboxylatophenyl)diazenyl)benzoato)-bis(mu!2$-N,N'-bis(pyridin-4-yl)pyridine-2,6-dicarboxamide)-di-zinc unknown solvate)		red	P-1	2	Block	8.06	148	0.925	0.925	The SQUEEZE/PLATON program was used to model some disordered solvent.			TEMP: 148 K COLOR: red "HABIT: Block
GAFROX	T.K.Pal, Dinesh De, S.Neogi, P.Pachfule, S.Senthilkumar, Qiang Xu, P.K.Bharadwaj	Chem.-Eur.J.	2015	(C22 H15 N1 O10 Zn2)n	catena-[(mu-2'-amino-1,1':3',1''-terphenyl-3,3'',5,5''-tetracarboxylato)-diaqua-di-zinc unknown solvate]		colorless	P63/mmc	194	Block	6.27	100	0.816	0.81	The SQUEEZE/PLATON program has been used to model some disorder.			TEMP: 100 K COLOR: colorless "HABIT: Block
GAFRUD	T.K.Pal, Dinesh De, S.Neogi, P.Pachfule, S.Senthilkumar, Qiang Xu, P.K.Bharadwaj	Chem.-Eur.J.	2015	(C22 H15 Cu2 N1 O10)n	catena-[(mu-2'-amino-1,1':3',1''-terphenyl-3,3'',5,5''-tetracarboxylato)-diaqua-di-copper unknown solvate]		green	P63/mmc	194	Block	4.33	100	0.82	0.814	The SQUEEZE/PLATON program has been used to model some disorder.			TEMP: 100 K COLOR: green "HABIT: Block
GAGZEV	O.K.Farha, A.O.Yazaydin, I.Eryazici, C.D.Malliakas, B.G.Hauser, M.G.Kanatzidis, S.T.Nguyen, R.Q.Snurr, J.T.Hupp	Nature Chemistry	2010	(C60 H24 Cu2 O12)n	catena-((mu!12$-1,3,5-Tris[(1,3-carboxylic acid-5-(4-(ethynyl)phenyl))ethynyl]benzene)-di-copper)			Fm-3m	225		13.8	100	0.198	0	The SQUEEZE/PLATON program has been used to model some disorder.		Large structure in which program limits have been exceeded	TEMP: at 100 K
GAHWIX	Xiaokai Song, Yang Zou, Xinfang Liu, Minhak Oh, Myoung Soo Lah	New J.Chem.	2010	(C126 H92 N14 O43 Zn8)n	catena-[tetrakis(mu!6$-4,4',4''-[1,3,5-benzenetriyltris(carbonylimino)]tribenzoato)-bis(mu!4$-oxo)-bis(dimethylformamide)-triaqua-octa-zinc]		colorless	P21/c	14	block	8.46	100	0.631	0.631	One dmf ligand is disordered and appears as OMe.	synchrotron radiation	Authors describe structure as having an extremely large solvent cavity	TEMP: at 100 K RADIATION: synchrotron radiation
GALGIL	E.C.Constable, Guoqi Zhang, C.E.Housecroft, J.A.Zampese	CrystEngComm	2012	(C38 H38 Cl2 N6 Ni1)3n,27n(H2 O1),n(C60)	catena-(bis(mu!2$-4'-t-butyl-4,2':6',4''-terpyridine)-di-chloro-nickel(ii) C60fullerene heptacosahydrate)		red	R-3m	166	block	11.43	173	0.797	0.784	The structure is disordered by symmetry.		Refinement without the use of SQUEEZE procedure	TEMP: at 173 K COLOR: red "HABIT: block
GALGIL01	E.C.Constable, Guoqi Zhang, C.E.Housecroft, J.A.Zampese	CrystEngComm	2012	(C38 H38 Cl2 N6 Ni1)3n,n(C60),27n(H2 O1)	catena-(bis(mu!2$-4'-t-butyl-4,2':6',4''-terpyridine)-di-chloro-di-nickel(ii) C60fullerene heptacosahydrate)		red	R-3m	166	block	6.57	173	0.797	0.681	The structure is disordered by symmetry. The disordered water solvent molecules were not modelled and the disordered density was taken into account using the SQUEEZE/PLATON procedure.			TEMP: at 173 K COLOR: red "HABIT: block
GALHOS	Ja-Min Gu, Sung-Jin Kim, Youngmee Kim, Seong Huh	CrystEngComm	2012	(C28 H16 In1 O8 1-)n,n(C2 H8 N1 1+),0.5n(H2 O1)	catena-(dimethylammonium bis(mu!2$-biphenyl-4,4'-dicarboxylato)-indium(iii) hemihydrate)	In-MOF 1	colorless	Fddd	70	octagon	6.02	293	0.911	0.911		at 293 K		TEMP: at 293 K COLOR: colorless "HABIT: octagon
GALHUY	Ja-Min Gu, Sung-Jin Kim, Youngmee Kim, Seong Huh	CrystEngComm	2012	(C28 H16 In1 O8)n	catena-(bis(mu!2$-biphenyl-4,4'-dicarboxylato)-indium)		orange	Fddd	70	octagon	6.86	293	0.848	0.848		at 293 K		TEMP: at 293 K COLOR: orange "HABIT: octagon
GALJAG	Ja-Min Gu, Sung-Jin Kim, Youngmee Kim, Seong Huh	CrystEngComm	2012	(C28 H16 In1 O8 1-)n,n(C4 H12 N1 1+)	catena-(diethylammonium bis(mu!2$-biphenyl-4,4'-dicarboxylato)-indium(iii))		colorless	Pnna	52	octagon	7.54	293	0.929	0		at 293 K		TEMP: at 293 K COLOR: colorless "HABIT: octagon
GAMXAV	Xi-Sen Wang, Le Meng, Qigan Cheng, Chungsik Kim, L.Wojtas, M.Chrzanowski, Yu-Sheng Chen, X.P.Zhang, Shengqian Ma	J.Am.Chem.Soc.	2011	(C36 H20 Cu3 N4 O10)n	catena-(bis(mu!9$-5,15-bis(3',5'-dicaboxylatophenyl)porphyrinato)-di-aqua-tri-copper unknonw solvate)	MMPF-1	red	I4/m	87	plate	9.6	100	0.907	0.903	The disordered unknown solvent molecules were not modelled and the disordered density was taken into account using the SQUEEZE/PLATON procedure.	synchrotron radiation	W.O. Patent: WO2012174379A2; E.P. Patent: EP2721032A2; E.P. Patent: EP2721032A4; U.S. Patent: US20140107333; W.O. Patent: WO2012174379A3	TEMP: 100 K RADIATION: synchrotron radiation
GAQYIH	Qianrong Fang, Guangshan Zhu, Ming Xue, Jinyu Sun, Yen Wei, Shilun Qiu, Ruren Xu	Angew.Chem.,Int.Ed.	2005	(C102 H408 Cd34 N68 O102 68+)n,68n(Cl1 1-),68n(C3 H7 N1 O1),46n(H2 O1)	catena-(heptadecakis(mu!4$-Hexamethylenetetramine-N,N',N'',N''')-dohecta-aqua-tetratriaconta-cadmium octahexacontachloride dimethylformamide solvate hydrate)		colorless	Fd-3m	227	octahedron	6.74	273	0.921	0	The disordered solvent molecules and water molecules were taken into account using PLATON/SQUEEZE. The chloride anions were also taken into account using PLATON/SQUEEZE.			TEMP: at 273 K COLOR: colorless "HABIT: octahedron
GAXKOH	Xiaojing Zhou, Baiyan Li, Guanghua Li, Qi Zhou, Zhan Shi, Shouhua Feng	CrystEngComm	2012	(C72 H54 Cd3 K1 N6 O15)n	catena-(hexakis(mu!3$-3-(pyridin-4-yl)benzoato)-triaqua-tri-cadmium-potassium unknown solvate)		colorless	P-31c	163	octahedral	6.19	293	0.993	0.989	The disordered unknown solvent molecules were not modelled and the disordered density was taken into account using the SQUEEZE/PLATON procedure.	at 293 K		TEMP: at 293 K COLOR: colorless "HABIT: octahedral
GAXKUN	Xiaojing Zhou, Baiyan Li, Guanghua Li, Qi Zhou, Zhan Shi, Shouhua Feng	CrystEngComm	2012	(C24 H16 Cd1 N2 O4)n	catena-(bis(mu!2$-4-(pyridin-4-yl)benzoato)-cadmium)		colorless	Pnna	52	octahedral	4.58	293	0.895	0.895	TThe disordered unknown solvent molecules were not modelled and the disordered density was taken into account using the SQUEEZE/PLATON procedure.	at 293 K		TEMP: at 293 K COLOR: colorless "HABIT: octahedral
GAZZIS	Sihai Yang, Xiang Lin, W.Lewis, M.Suyetin, E.Bichoutskaia, J.E.Parker, C.C.Tang, D.R.Allan, P.J.Rizkallah, P.Hubberstey, N.R.Champness, K.M.Thomas, A.J.Blake, M.Schroder	Nat.Mater	2012	(C40 H22 In1 O8 1-)1.75n,1.75n(C2 H8 N1 1+)	catena-(dimethylammonium (mu!4$-biphenyl-3,3',5,5'-tetrakis(4-carboxyphenyl))-tetra-indium)		colorless	C2/c	15	tablet	4.79	120	0.631	0.631	C20A,C21A,C23A,C24A and C20B,C21B,C23B,C24B disordered over two sites with occupancies 0.502:0.498; The SQUEEZE/PLATON program has been used to model some disorder.	synchrotron radiation		TEMP: at 120 K RADIATION: synchrotron radiation
GAZZIS01	Sihai Yang, Xiang Lin, W.Lewis, M.Suyetin, E.Bichoutskaia, J.E.Parker, C.C.Tang, D.R.Allan, P.J.Rizkallah, P.Hubberstey, N.R.Champness, K.M.Thomas, A.J.Blake, M.Schroder	Nat.Mater	2012	(C40 H22 In1 O8 1-)1.75n,1.75n(C2 H8 N1 1+)	catena-(dimethylammonium (mu!4$-biphenyl-3,3',5,5'-tetrakis(4-carboxyphenyl))-tetra-indium)		colorless	C2/c	15	tablet	4.99	150	0.627	0.627	C20B,C21B,C23B,C24B and C20A,C21A,C23A,C24A disordered over two sites with occupancies 0.510:0.490; The SQUEEZE/PLATON program has been used to model some disorder.	synchrotron radiation		TEMP: at 150 K RADIATION: synchrotron radiation
GAZZIS02	Sihai Yang, Xiang Lin, W.Lewis, M.Suyetin, E.Bichoutskaia, J.E.Parker, C.C.Tang, D.R.Allan, P.J.Rizkallah, P.Hubberstey, N.R.Champness, K.M.Thomas, A.J.Blake, M.Schroder	Nat.Mater	2012	(C40 H22 In1 O8 1-)1.75n,1.75n(C2 H8 N1 1+)	catena-(dimethylammonium (mu!4$-biphenyl-3,3',5,5'-tetrakis(4-carboxyphenyl))-tetra-indium)		colorless	C2/c	15	tablet	4.99	180	0.622	0.622	C20A,C21A,C23A,C24A and C20B,C21B,C23B,C24B disordered over two sites with occupancies 0.535:0.465; The SQUEEZE/PLATON program has been used to model some disorder.			TEMP: at 180 K COLOR: colorless "HABIT: tablet
GAZZIS03	Sihai Yang, Xiang Lin, W.Lewis, M.Suyetin, E.Bichoutskaia, J.E.Parker, C.C.Tang, D.R.Allan, P.J.Rizkallah, P.Hubberstey, N.R.Champness, K.M.Thomas, A.J.Blake, M.Schroder	Nat.Mater	2012	(C40 H22 In1 O8 1-)1.75n,1.75n(C2 H8 N1 1+)	catena-(dimethylammonium (mu!4$-biphenyl-3,3',5,5'-tetrakis(4-carboxyphenyl))-tetra-indium)		colorless	C2/c	15	tablet	4.87	200	0.62	0.62	C20A,C21A,C23A,C24A and C20B,C21B,C23B,C24B disordered over two sites with occupancies 0.555:0.445; The SQUEEZE/PLATON program has been used to model some disorder.			TEMP: at 200 K COLOR: colorless "HABIT: tablet
GAZZIS04	Sihai Yang, Xiang Lin, W.Lewis, M.Suyetin, E.Bichoutskaia, J.E.Parker, C.C.Tang, D.R.Allan, P.J.Rizkallah, P.Hubberstey, N.R.Champness, K.M.Thomas, A.J.Blake, M.Schroder	Nat.Mater	2012	(C40 H22 In1 O8 1-)1.75n,1.75n(C2 H8 N1 1+)	catena-(dimethylammonium (mu!4$-biphenyl-3,3',5,5'-tetrakis(4-carboxyphenyl))-tetra-indium)		colorless	C2/c	15	tablet	5.12	220	0.614	0.614	C20B,C21B,C23B,C24B and C20A,C21A,C23A,C24A disordered over two sites with occupancies 0.504:0.496; The SQUEEZE/PLATON program has been used to model some disorder.			TEMP: at 220 K COLOR: colorless "HABIT: tablet
GAZZIS05	Sihai Yang, Xiang Lin, W.Lewis, M.Suyetin, E.Bichoutskaia, J.E.Parker, C.C.Tang, D.R.Allan, P.J.Rizkallah, P.Hubberstey, N.R.Champness, K.M.Thomas, A.J.Blake, M.Schroder	Nat.Mater	2012	(C40 H22 In1 O8 1-)1.75n,1.75n(C2 H8 N1 1+)	catena-(dimethylammonium (mu!4$-biphenyl-3,3',5,5'-tetrakis(4-carboxyphenyl))-tetra-indium)		colorless	C2/c	15	tablet	7.06	260	0.608	0.608	C2B,C3B,C5B,C6B and C2A,C3A,C5A,C6A disordered over two sites with occupancies 0.627:0.373; C20B,C21B,C23B,C24B and C20A, C21A,C23A,C24A disordered over two sites with occupancies 0.630:0.370; The SQUEEZE/PLATON program has been used to model some disorder.			TEMP: at 260 K COLOR: colorless "HABIT: tablet
GEGDED	Wenjuan Zhuang, Daqiang Yuan, Dahuan Liu, Chongli Zhong, Jian-Rong Li, Hong-Cai Zhou	Chem.Mater.	2012	(C37 H28 Cu4 O24)n	catena-((mu!16$-tetrakis((3,5-Dicarboxylatophenyl)oxymethyl)methane)-tetra-aqua-tetra-copper unknown solvate)			Pbcm	57		5.08	173	0.897	0.897	The solvent molecules were taken into account using PLATON/SQUEEZE.			TEMP: at 173 K
GESDOZ	Liangliang Zhang, Fuling Liu, Yu Guo, Xingpo Wang, Jie Guo, Yanhui Wei, Zhen Chen, Daofeng Sun	Cryst.Growth Des.	2012	(C96 H76 Co3 O26)n	catena-(tris(mu!4$-4,4'-(2,3,6,7-Tetramethoxyanthracene-9,10-diyl)dibenzoato)-diaqua-tri-cobalt)		purple	R-3	148	block	4.01	293	0.88	0.88		at 293 K	We calculate 23% void space in the structure	TEMP: at 293 K COLOR: purple "HABIT: block
GESVAC	S.Winter, E.Weber, L.Eriksson, I.Csoregh	New J.Chem.	2006	(C178 H158 Cu7 N12 O28)n	catena-(tetrakis(mu!3$-1,3,5-tris(2-(4-Pyridyl)ethynyl)benzene)-trans-tetradecakis(1,1,1,5,5,5-hexafluoropentane-1,4-dionato)-hepta-copper(ii))		green	P-1	2	irregular	7.22	293	0.808	0	Trifluoromethyl groups are disordered but the disorder could not be resolved into distinct disorder sites.	at 293 K	Large structure for which program limits have been exceeded and all F and H atoms have been deleted, together with most of the Cu atoms and their associated acetylacetonato ligands and two bridging ligands. A full set of data are available from the deposited CIF. Seven Cu centres occupy general positons, whilst 4 Cu centres occupy special positions with 0.5 occupancy; each Cu has trans hexafluoro…	TEMP: at 293 K MP: 270 deg.C(dec.) "COLOR: green "HABIT: irregular "SOURCE-CHEM: chloroform
GEYFIB	Baishu Zheng, Heting Liu, Zhaoxu Wang, Xianyong Yu, Pinggui Yi, Junfeng Bai	CrystEngComm	2013	(C24 H16 Cu2 N2 O12)n	catena-[(mu!8$-5,5'-(Benzene-1,4-diylbis(carbonylimino))dibenzene-1,3-dicarboxylato)-diaqua-di-copper(ii) unknown solvate]	HNUST-1	blue	R-3mr	166	polyhedra	5.22	298	0.614	0.61	The structure is disordered. Disordered solvent molecules were not modelled and the disordered density was taken into account using the SQUEEZE/PLATON procedure.	298 K		TEMP: 298 K COLOR: blue "HABIT: polyhedra
GIDBEA	M.Parvez, A.D.Pajerski, H.G.Richey Junior	Acta Crystallogr.,Sect.C:Cryst.Struct.Commun.	1988	(C28 H60 Mg2 O4)n	catena((mu!2$-1,4-Dioxane-O,O')-dineopentyl-magnesium)		colorless	C2/c	15		4.2	295	0.99	0.99
GIJXAA	S.B.Aliev, D.G.Samsonenko, V.P.Fedin	Koord.Khim.(Russ.)(Coord.Chem.)	2013	(C26 H14 N2 O9 Zn2)n,2n(H2 O1)	catena-[bis(mu!3$-Naphthalene-2,6-dicarboxylato)-(mu!3$-1,3,4-oxadiazole)-di-zinc(ii) dihydrate]		colorless	Immm	71	block	8.49	295	0.761	0.761	C10,C12,C3,C4,C6,C7,C8,C9,O13 disordered by symmetry over two sites with occupancy 0.50; O6W,O7W disordered by symmetry over two sites with occupancy 0.06.	295 K		TEMP: 295 K COLOR: colorless "HABIT: block
GIPSEE	C.Strohmann, V.H.Gessner	Angew.Chem.,Int.Ed.	2007	(C28 H64 Li4 N4)n,n(C6 H14 N2)	catena-(tetrakis(mu!2$-t-but-1,1-diyl)-bis(mu!2$-1,4-dimethylpiperazine-N,N')-tetra-lithium 1,4-dimethylpiperazine)		colorless	P-1	2	cube	5.55	193	0.959	0.959				TEMP: at 193 K COLOR: colorless "HABIT: cube "SOURCE-CHEM: n-pentane
GISGEW	D.G.(.Patel, I.M.Walton, J.M.Cox, C.J.Gleason, D.R.Butzer, J.B.Benedict	Chem.Commun.	2014	(C84 H60 O13 S6 Zn4)n	catena-[tris(mu!4$-9,10-bis(2,5-Dimethylthiophen-3-yl)phenanthrene-2,7-dicarboxylato)-(mu!4$-oxo)-tetra-zinc unknown solvate]	UBMOF-1	yellowish colorless	Fm-3m	225	block	19.37	90	0.572	0	The structure extensively disordered. The authors state the disorder effectively eliminates all high-resolution data preventing a more complete structure model.			TEMP: at 90 K COLOR: yellowish colorless "HABIT: block "SOURCE-CHEM: dimethylformamide "ISO: Isomorphous with the IRMOF-10 and IRMOF-14 frameworks
GISNED	Ping Shen, Wen-Wen He, Dong-Ying Du, Hai-Long Jiang, Shun-Li Li, Zhong-Ling Lang, Zhong-Min Su, Qiang Fu, Ya-Qian Lan	Chemical Science	2014	(C99 H72 O38 Zn8)n,46n(C2 H7 N1),10n(H2 O1)	catena-[tris(mu!8$-tetrakis((4-Carboxylatophenoxy)methyl)methane)-bis(mu!4$-oxo)-octa-zinc dimethylamine solvate decahydrate]	IFMC-68		R-3c	167		4.03	293	0.868	0	Disordered solvent molecules were not modelled and the disordered density was taken into account using the SQUEEZE/PLATON procedure.	at 293 K		TEMP: at 293 K
GITTOT	R.Banerjee, Anh Phan, Bo Wang, C.Knobler, H.Furukawa, M.O'Keeffe, O.M.Yaghi	Science	2008	(C48 H60 Co6 N24)n,4n(H2 O1)	catena-(dodecakis(mu!2$-2-Methylimidazolato)-hexa-cobalt(ii) tetrahydrate clathrate)	ZIF-67-SOD	pink	I-43m	217	cubic	7.24	153	0.952	0.947	Unidentified guest molecules are highly disordered and modelled as isolated O atoms; these have been treated as water molecules.			TEMP: at 153 K COLOR: pink "HABIT: cubic
GIXJEE	Jun Yoshida, S.Nishikiori, H.Yuge	J.Coord.Chem.	2013	(C130 H94 Co3 N8 O12)n	catena-[bis(mu-2,6-bis(4'-pyridyl)-4-(3'-pyridyl)pyridine)-hexakis(3-oxo-1,3-diphenylprop-1-en-1-olato)-tri-cobalt unknown solvate]		red	R-3	148	bipyramidal	9.01	153	0.904	0.904	The SQUEEZE/PLATON program may have been used.			TEMP: at 153 K COLOR: red "HABIT: bipyramidal
GIXNAE	M.S.Zavakhina, D.G.Samsonenko, A.V.Virovets, D.N.Dybtsev, V.P.Fedin	J.Solid State Chem.	2014	(C14 H12 N2 Ni1 O5)n,1.5n(C1 H4 O1)	catena-[(mu!2$-malato)-(mu!2$-4,4'-bipyridine)-nickel methanol solvate]		turquoise	P212121	19	prism	8.22	150	0.971	0.971				TEMP: at 150 K COLOR: turquoise "HABIT: prism
GIYJAB	Li-Na Jia, Yang Zhao, Lei Hou, Lin Cui, Hai-Hua Wang, Yao-Yu Wang	J.Solid State Chem.	2014	(C76 H60 Co4 N8 O16)n	catena-[tetrakis(mu!4$-3,3',5,5'-tetramethyl-1H,1'H-4,4'-bipyrazole)-bis(mu!2$-biphenyl-4,4'-dicarboxylato)-tetra-cobalt unknown solvate]		purple	P2/c	13	block	6.77	296	0.947	0.947	The SQUEEZE/PLATON program has been used to model some disorder.	at 296 K		TEMP: at 296 K COLOR: purple "HABIT: block
GOMFOF	S.D.Hoffmann, J.W.Buchler	CSD Communication(Private Communication)	2009	(C44 H24 K2 N4 Na4 O12 Pd1 S4)n	catena-[(mu-4,4',4'',4'''-(porphine-5,10,15,20-tetrayl)tetrabenzenesulfonato)-palladium(ii)-di-potassium-tetra-sodium]		brown orange	I41/acd	142	plate	6.96	120	0.96	0				COLOR: brown orange HABIT: plate
GOVSER	Zhichao Hu, Guangxi Huang, W.P.Lustig, Fangming Wang, Hao Wang, S.J.Teat, D.Banerjee, Deqing Zhang, Jing Li	Chem.Commun.	2015	(C108 H64 O16 Zn4)n	catena-[bis(mu!8$-4',4'',4''',4''''-ethene-1,1,2,2-tetrayltetrabiphenyl-4-carboxylato)-tetra-zinc unknown solvate]		colorless	C2/c	15	needle	8.98	100	0.929	0.929	Disordered solvent molecules were not modelled and the disordered density was taken into account using the SQUEEZE/PLATON procedure.	synchrotron radiation; twin		TEMP: at 100 K RADIATION: synchrotron radiation "OTHER-EXP: Luminescent "OTHER-DIFF: twin
GUGJEZ	Wei Xie, Shu-Ran Zhang, Dong-Ying Du, Jun-Sheng Qin, Shao-Juan Bao, Jing Li, Zhong-Min Su, Wen-Wen He, Qiang Fu, Ya-Qian Lan	Inorg.Chem.	2015	(C168 H96 N12 O58 Zn16)n,n(C3 H7 N1 O1)	catena-(dodecakis(mu!4$-9H-Carbazole-3,6-dicarboxylato)-tetrakis(mu!4$-oxo)-hexa-aqua-hexadeca-zinc dimethylformamide solvate)	NENU-522		R-3	148		28.4	295	0.642	0	PLATON/SQUEEZE was used to model an unspecified number of dimethylformamide solvent molecules.
GUPBEZ02	Yao Kang, Fei Wang, Jian Zhang, Xianhui Bu	J.Am.Chem.Soc.	2012	(C96 H192 Cu32 I32 N32)n	catena-[dotriacontakis(mu!3$-iodo)-hexadecakis(mu!2$-1,4-diazabicyclo[2.2.2]octane)-dotriaconta-copper unknown solvate]	COZ-1	yellow	Fd-3m	227	cubic	10.79	293	0.92	0	Disordered solvent molecules were not modelled and the disordered density was taken into account using the SQUEEZE/PLATON procedure.	293 K		TEMP: 293 K COLOR: yellow "HABIT: cubic
GUPBOJ03	O.Karagiaridi, W.Bury, A.A.Sarjeant, C.L.Stern, O.K.Farha, J.T.Hupp	Chemical Science	2012	(C8 H10 Cd1 N4)n	catena-(bis(mu!2$-2-methylimidazolato)-cadmium(ii) unknown solvate)	SALEM-1	colorless	Im3m	229	block	6.73	100	0.767	0.767	C6 and C6A disordered over two sites with occupancies 0.290:0.210; C5 and C5A disordered over two sites with occupancies 0.580:0.420. The solvent molecules were not modelled.			TEMP: 100 K POLYMORPH: Im3m polymorph
GUPBUP	Yun-Qi Tian, Shi-Yan Yao, Dong Gu, Ke-Hui Cui, Dong-Wei Guo, Gao Zheng, Zhen-Xia Chen, Dong-Yuan Zhao	Chem.-Eur.J.	2010	(C16 H20 Cd2 N8)n,n(H2 O1)	catena-(tetrakis(mu!2$-2-Methylimidazolato-N,N')-di-cadmium monohydrate)		pale yellow	I-43m	217	polyhedron	3.95	293	0.95	0.95	The water molecule is disordered.	at 293 K		TEMP: at 293 K COLOR: pale yellow "HABIT: polyhedron
GUPCAW	Yun-Qi Tian, Shi-Yan Yao, Dong Gu, Ke-Hui Cui, Dong-Wei Guo, Gao Zheng, Zhen-Xia Chen, Dong-Yuan Zhao	Chem.-Eur.J.	2010	(C32 H40 Cd4 N16)n,n(H2 O1)	catena-(octakis(mu!2$-2-Methylimidazolato-N,N')-tetra-cadmium monohydrate)		colorless	I4/m	87	block	6.97	293	0.856	0.856	Parts of two imidazole ligands are disordered, as is the water molecule.	at 293 K	The structure contains 36% void space	TEMP: at 293 K COLOR: colorless "HABIT: block
GUPDEB	Yun-Qi Tian, Shi-Yan Yao, Dong Gu, Ke-Hui Cui, Dong-Wei Guo, Gao Zheng, Zhen-Xia Chen, Dong-Yuan Zhao	Chem.-Eur.J.	2010	(C6 H4 Cd1 N6 O4)n,0.04n(H2 O1)	catena-[bis(mu!2$-2-Nitroimidazolato)-cadmium hydrate]		yellow	Im-3m	229	polyhedron	6.63	293	0.947	0.948		at 293 K		TEMP: at 293 K COLOR: yellow "HABIT: polyhedron
GURMOX	Zhongyue Zhang, H.Yoshikawa, K.Awaga	J.Am.Chem.Soc.	2014	(C48 H18 Cu3 O18)n	catena-[tris(mu-9,10-dioxo-9,10-dihydroanthracene-2,7-dicarboxylato)-tri-copper]		green	P-1	2	prism	8.9	123	0.933	0.933			We calculate void space in the structure	TEMP: 123 K COLOR: green "HABIT: prism
GUVYIH	K.Hirai, J.Reboul, N.Morone, J.E.Heuser, Shuhei Furukawa, S.Kitagawa	J.Am.Chem.Soc.	2014	(C34 H20 N2 O8 Zn2)n	catena-[bis(mu!4$-1,4-Naphthalenedicarboxylato)-(4,4'-bipyridine)-di-zinc unknown solvate]		colorless	P4/mmm	123	prism	6.92	223	0.706	0.706	The structure is disordered by symmetry. Solvent molecules have not been identified from the diffraction data.			TEMP: 223 K COLOR: colorless "HABIT: prism
HABCEV	B.K.Tripuramallu, H.M.Titi, S.Roy, R.Verma, I.Goldberg	CrystEngComm	2016	(C52 H30 Gd2 N4 Na2 O21 Zn1)n	catena-[(mu-5,10,15,20-tetrakis(3,5-dicarboxylatophenyl)porphyrin-21,23-diyl)-penta-aqua-di-gadolinium-zinc-di-sodium unknown solvate]		red	Imma	74	prism	6.46	110	0.927	0.927	The SQUEEZE/PLATON program has been used to model some disorder.	twin		TEMP: 110 K OTHER-DIFF: twin
HABCIZ	B.K.Tripuramallu, H.M.Titi, S.Roy, R.Verma, I.Goldberg	CrystEngComm	2016	(C52 H30 N4 Na2 O21 Sm2 Zn1)n	catena-[(mu-5,10,15,20-tetrakis(3,5-dicarboxylatophenyl)porphyrin-21,23-diyl)-penta-aqua-di-samarium-zinc-di-sodium unknown solvate]		red	Imma	74	prism	7.36	110	0.937	0.937	The SQUEEZE/PLATON program has been used to model some disorder.	twin		TEMP: 110 K OTHER-DIFF: twin
HABCOF	B.K.Tripuramallu, H.M.Titi, S.Roy, R.Verma, I.Goldberg	CrystEngComm	2016	(C52 H30 Dy2 N4 Na2 O21 Zn1)n	catena-[(mu-5,10,15,20-tetrakis(3,5-dicarboxylatophenyl)porphyrin-21,23-diyl)-penta-aqua-di-dysprosium-zinc-di-sodium unknown solvate]		red	Imma	74	prism	5.23	110	0.95	0.949	The SQUEEZE/PLATON program has been used to model some disorder.	twin		TEMP: 110 K OTHER-DIFF: twin
HABDAS	B.K.Tripuramallu, H.M.Titi, S.Roy, R.Verma, I.Goldberg	CrystEngComm	2016	(C52 H30 Eu2 N4 Na2 O21 Zn1)n	catena-[(mu-5,10,15,20-tetrakis(3,5-dicarboxylatophenyl)porphyrin-21,23-diyl)-penta-aqua-di-europium-zinc-di-sodium unknown solvate]		red	Imma	74	chunk	10.36	110	0.934	0.934	The SQUEEZE/PLATON program has been used to model some disorder.	twin		TEMP: 110 K OTHER-DIFF: twin
HABQUY	Daqiang Yuan, Dan Zhao, Daofeng Sun, Hong-Cai Zhou	Angew.Chem.,Int.Ed.	2010	(C60 H30 Cu3 O15)n,22n(C3 H7 N1 O1),19n(H2 O1)	catena-[(mu!12$-1,3,5-tris(2-(4-(2-(3,5-Dicarboxylatophenyl)ethynyl)phenyl)ethynyl)benzene)-triaqua-tri-copper(ii) dimethylformamide solvate nonadecahydrate]	PCN-610	green	Fm-3m	225	prism	12.27	150	0.804	0	The SQUEEZE/PLATON program has been used to model the severely disordered solvent molecules. The unit cell was found to contain a void of 178979 A$3!, holding a total of 41652 electrons.	synchrotron radiation		TEMP: at 150 K RADIATION: synchrotron radiation
HAFVUH	Qipu Lin, Tao Wu, Shou-Tian Zheng, Xianhui Bu, Pingyun Feng	Chem.Commun.	2011	(C16 H10 Mg2 O10)n	catena-((mu!8$-biphenyl-3,3',5,5'-tetracarboxylato)-bis(mu!2$-aqua)-di-magnesium)		colorless	I4122	98	needle	8.75	296	0.949	0.939		at 296 K		TEMP: at 296 K COLOR: colorless "HABIT: needle
HAFWAO	Qipu Lin, Tao Wu, Shou-Tian Zheng, Xianhui Bu, Pingyun Feng	Chem.Commun.	2011	(C32 H12 O16 Zn2 4-)n,7n(H2 O1),4n(C2 H8 N1 1+)	catena-(bis(mu!4$-biphenyl-3,3',5,5'-tetracarboxylato)-di-zinc tetrakis(dimethylammonium) heptahydrate)		colorless	I-42d	122	block	9.86	296	0.964	0.952	C105,C106,N3 and C103,C104,N2 disordered over two sites with occupancies 0.580:0.420.	at 296 K		TEMP: at 296 K COLOR: colorless "HABIT: block
HAHZUM	M.Kondo, Y.Irie, Y.Shimizu, M.Miyazawa, H.Kawaguchi, A.Nakamura, T.Naito, K.Maeda, F.Uchida	Inorg.Chem.	2004	(C17 H15 N1 O6 Zn1)n,n(C3 H7 N1 O1)	catena-((mu!4$-4,4'-Oxy-bis(benzoato-O,O'))-(dimethylformamide)-zinc(ii) dimethylformamide solvate)		colorless	Pnna	52	prism	5.96	293	0.925	0.925		at 293.2 K		TEMP: at 293.2 K OTHER-EXP: Reversibly transforms into an aqua polymer, via an amorphous state, on addition of water
HAPKOA	S.D.Burd, Shengqian Ma, J.A.Perman, B.J.Sikora, R.Q.Snurr, P.K.Thallapally, Jian Tian, L.Wojtas, M.J.Zaworotko	J.Am.Chem.Soc.	2012	(C20 H16 Cu1 F6 N4 Si1)n	catena-(bis(mu!2$-4,4'-bipyridine)-(mu!2$-hexafluorosilicate)-copper unknown solvate)		purple blue	P4/mmm	123	block	4.51	100	0.864	0.864	The structure is disordered by symmetry. Disordered solvent molecules were not modelled and the disordered density was taken into account using the SQUEEZE/PLATON procedure.	synchrotron radiation		TEMP: at 100 K RADIATION: synchrotron radiation
HAPKUG	S.D.Burd, Shengqian Ma, J.A.Perman, B.J.Sikora, R.Q.Snurr, P.K.Thallapally, Jian Tian, L.Wojtas, M.J.Zaworotko	J.Am.Chem.Soc.	2012	(C24 H20 Cu1 F6 N4 Si1)n	catena-(bis(mu!2$-1,2-bis(pyridin-4-yl)ethene)-(mu!2$-hexafluorosilicate)-copper unknown solvate)		purple	P4/nmm	129	block	6.86	100	0.666	0.666	The structure is disordered by symmetry. Disordered solvent molecules were not modelled and the disordered density was taken into account using the SQUEEZE/PLATON procedure.			TEMP: at 100 K COLOR: purple "HABIT: block
HEHCOO	G.Kumar, R.Gupta	Inorg.Chem.Commun.	2012	(C68 H44 Cd2 Cl2 Co2 N20 O8)n,4n(H2 O1)	catena-[tetrakis(mu!3$-N-(2-Pyridyl)-N'-(3-pyridyl)pyridine-2,6-dicarboxamido)-dichloro-di-cadmium-di-cobalt tetrahydrate]		green	P3121	152	block	9.56	180	0.906	0.901	One water molecule is disordered over two sites with occupancies 0.50:0.50.			TEMP: at 180 K COLOR: green "HABIT: block
HELDOT	Dongwook Kim, Xiaokai Song, Jung Hee Yoon, Myoung Soo Lah	Cryst.Growth Des.	2012	(C62 H48 Co3 N2 O14)n	catena-(bis(mu!6$-4,4',4''-benzene-1,3,5-triylbenzoato)-tetrakis(N,N-dimethylacetamide)-tri-cobalt(ii) unknown solvate)		deep purple	P3221	154	block	8	173	0.824	0.824	C281,C291,C301,C311,N11 and C282,C292,C302,C312,N12 disordered over two sites with occupancies 0.566:0.434; The disordered unknown solvent molecules were not modelled and the disordered density was taken into account using the SQUEEZE/PLATON procedure.			TEMP: at 173 K COLOR: deep purple "HABIT: block
HEXVEM	Xi-Sen Wang, Shengqian Ma, Daofeng Sun, S.Parkin, Hong-Cai Zhou	J.Am.Chem.Soc.	2006	(C48 H36 Cu3 N12 O15)n	catena-(bis(mu!6$-4,4',4''-s-triazine-1,3,5-triyltris(p-aminobenzoato))-triaqua-tri-copper)		blue	Fm-3	202	Block	9.12	240	0.263	0.262		twin	Unusually low density given in CIF, and in the paper the structure is described as porous with large voids	TEMP: at 240 K OTHER-DIFF: twin
HIFGIO	J.Sahu, M.Ahmad, P.K.Bharadwaj	Cryst.Growth Des.	2013	(C44 H32 O10 Zn3)n	catena-[bis(mu!4$-2',5'-Dimethyl-1,1':4',1''-terphenyl-4,4''-dicarboxylato)-bis(mu!3$-oxo)-tri-zinc unknown solvate]		colorless	C2/m	12	prism	7.99	100	0.731	0.731	Disordered solvent molecules were not modelled and the disordered density was taken into account using the SQUEEZE/PLATON procedure.			TEMP: at 100 K COLOR: colorless "HABIT: prism
HIFTOG01	J.Hafizovic, M.Bjorgen, U.Olsbye, P.D.C.Dietzel, S.Bordiga, C.Prestipino, C.Lamberti, K.P.Lillerud	J.Am.Chem.Soc.	2007	(C24 H12 O13 Zn4)n	catena-(tris(mu!4$-Benzene-1,4-dicarboxylato)-(mu!4$-oxo)-tetra-zinc unknown solvate)		colorless	R-3m	166	Cube	8.23	293	0.584	0.584	The SQUEEZE procedure was used to model the electron density associated with disordered unspecified solvent.	at 293 K		TEMP: at 293 K COLOR: colorless "HABIT: Cube
HIFTOG03	Lodey Tshering, S.O.Hunter, A.Nikolich, E.Minato, C.M.Fitchett, D.M.D'Alessandro, C.Richardson	CrystEngComm	2014	(C24 H12 O13 Zn4)n	catena-[(mu-oxo)-tris(mu-terephthalato)-tetra-zinc unknown solvate]		yellow	Fm-3m	225	block	6.16	291	0.598	0.589	The SQUEEZE/PLATON program may have been used.	290.8 K		TEMP: 290.8 K COLOR: yellow "HABIT: block "SENS: Moisture-sensitive
HIFTOG04	Lodey Tshering, S.O.Hunter, A.Nikolich, E.Minato, C.M.Fitchett, D.M.D'Alessandro, C.Richardson	CrystEngComm	2014	(C24 H12 O13 Zn4)n	catena-[(mu-oxo)-tris(mu-benzene-1,4-dicarboxylato)-tetra-zinc unknown solvate]		colorless	Pm-3m	221	block	19.82	291	0.61	0.601	The structure is disordered.The SQUEEZE/PLATON program may have been used.	290.8 K		TEMP: 290.8 K COLOR: colorless "HABIT: block "SENS: Moisture-sensitive
HIFVOI	Yun-Qi Tian, Yu-Ming Zhao, Zhen-Xia Chen, Guang-Ning Zhang, Lin-Hong Weng, Dong-Yuan Zhao	Chem.-Eur.J.	2007	(C12 H12 N8 Zn2)n,2n(H2 O1)	catena-(tetrakis(mu!2$-Imidazolato-N,N')-di-zinc(ii) dihydrate unknown clathrate)		colorless	P42/mnm	136	prism	6.87	298	0.931	0.931	A number of C atoms from three imidazole rings are disordered equally over two sites. The structure contains disordered guest molecules which could not be determined.	at 298 K		TEMP: at 298 K COLOR: colorless "HABIT: prism
HIFVUO	Yun-Qi Tian, Yu-Ming Zhao, Zhen-Xia Chen, Guang-Ning Zhang, Lin-Hong Weng, Dong Yuan Zhao	Chem.-Eur.J.	2007	(C6 H6 N4 Zn1)n	catena-(bis(mu!2$-Imidazolato-N,N')-zinc(ii) unknown clathrate)		colorless	I41/a	88	block	6.29	293	0.819	0.819	The structure contains disordered guest molecules which could not be determined.	at 293 K		TEMP: at 293 K POLYMORPH: I41/a polymorph
HIFVUO01	O.Karagiaridi, M.B.Lalonde, W.Bury, A.A.Sargeant, O.K.Farha, J.T.Hupp	J.Am.Chem.Soc.	2012	(C6 H6 N4 Zn1)n	catena-[bis(mu!2$-imidazolato)-zinc(ii)]		colorless	I-43m	217	block	2.61	100	0.834	0.834	The structure is disordered.		We calculate 43.11% void space in the structure	TEMP: at 100.0 K POLYMORPH: I-43m polymorph
HIGZOO	G.F.S.Whitehead, B.Cross, L.Carthy, V.A.Milway, H.Rath, A.Fernandez, S.L.Heath, C.A.Muryn, R.G.Pritchard, S.J.Teat, G.A.Timco, R.E.P.Winpenny	Chem.Commun.	2013	(C80 H144 Cr7 F8 Ni1 O32)n,n(C68 H80 Cu2 F24 N8 O8),4n(C7 H8)	catena-[hexadecakis(mu!2$-pivalato)-octakis(mu!2$-fluoro)-nickel-hepta-chromium bis(mu!2$-N,N'-bis[2-(pyridin-4-yl)ethyl]decane-1,10-diamine)-tetrakis(1,1,1,5,5,5-hexafluoroacetylacetonato)-di-copper toluene solvate]		green	P21/c	14	Needle	10.6	100	0.987	0	The structure is disordered.			TEMP: at 100 K COLOR: green "HABIT: Needle
HIHGIQ	Lian Zhou, Yun-Shan Xue, Jun Zhang, Hong-Bin Du, Xiao-Zeng You	CrystEngComm	2013	(C45 H34 Co2 N2 O12)n	catena-[(mu!8$-4-(3-(4-Carboxyatophenoxy)-2,2-bis((4-carboxyphenoxy)methyl)propoxy)benzoato)-(mu!2$-4,4'-ethene-1,2-diyldipyridine)-di-cobalt unknown solvate]		purple	C2/c	15	cubic	5.07	296	0.903	0.903	C42,C43,C44,C45,N1 and C42',C43',C44',C45',N1' disordered over two sites with occupancies 0.712:0.288; The SQUEEZE/PLATON program has been used to model some disorder.	at 296 K		TEMP: at 296 K COLOR: purple "HABIT: cubic
HIHGOW	Lian Zhou, Yun-Shan Xue, Jun Zhang, Hong-Bin Du, Xiao-Zeng You	CrystEngComm	2013	(C45 H34 N2 O12 Zn2)n	catena-[(mu!8$-4-(3-(4-Carboxyatophenoxy)-2,2-bis((4-carboxyphenoxy)methyl)propoxy)benzoato)-(mu!2$-4,4'-ethene-1,2-diyldipyridine)-di-zinc unknown solvate]		colorless	C2/c	15	block	7.43	296	0.916	0.916	The SQUEEZE/PLATON program has been used to model some disorder.	at 296 K		TEMP: at 296 K COLOR: colorless "HABIT: block
HIHGUC	Lian Zhou, Yun-Shan Xue, Jun Zhang, Hong-Bin Du, Xiao-Zeng You	CrystEngComm	2013	(C33 H26 Cd1 O12)n,0.25n(H2 O1)	catena-[mu!4$- 4-(3-(4-Carboxylatophenoxy)-2,2-bis((4-carboxyphenoxy)methyl)propoxy)benzoato)-cadmium hydrate]		colorless	C2/c	15	rod	6.96	296	0.701	0.701	O13 disordered by symmetry over two sites with occupancy 0.25; The SQUEEZE/PLATON program has been used to model some disorder.	at 296 K		TEMP: at 296 K COLOR: colorless "HABIT: rod
HIHNUJ	Jinjie Qian, Feilong Jiang, Daqiang Yuan, Xingjun Li, Linjie Zhang, Kongzhao Su, Maochun Hong	J.Mater.Chem.A	2013	(C16 H6 In1 O8)n	catena-[(mu!4$-Biphenyl-3,3',5,5'-tetracarboxylato)-indium unknown solvate]		colorless	P43212	96	block	2.28	173	0.813	0.813	Disordered solvent molecules were not modelled and the disordered density was taken into account using the SQUEEZE/PLATON procedure.			TEMP: 173 K COLOR: colorless "HABIT: block
HIKSIF	Dawei Feng, Hai-Long Jiang, Ying-Pin Chen, Zhi-Yuan Gu, Zhangwen Wei, Hong-Cai Zhou	Inorg.Chem.	2013	(C144 H72 Cu3 N12 O30 Zr8)n	catena-(tris(mu!9$-5,10,15,20-tetrakis(4-Carboxylatophenyl)porphyrinato)-hexakis(mu!4$-oxo)-tri-copper-octa-zirconium unknown solvate)	Zr-PCN-221(Cu)	red	Pm-3m	221	cubic	19.24	173	0.754	0.754	The SQUEEZE/PLATON program has been used to model some disorder.			TEMP: 173 K COLOR: red "HABIT: cubic
HIWXIV	J.C.G.Ruiz, H.Noth, M.Warchhold	Eur.J.Inorg.Chem.	2008	(C4 H14 B1 Li1 O1)n	catena-[(mu!3$-Tetrahydroborato)-(tetrahydrofuran)-lithium]		colorless	P21/c	14	block	6.63	213	0.967	0.946				TEMP: at 213 K COLOR: colorless "HABIT: block
HIWXOB	J.C.G.Ruiz, H.Noth, M.Warchhold	Eur.J.Inorg.Chem.	2008	(C8 H32 B2 Na2 O4)n	catena-[(mu!3$-Tetrahydroborato-H,H,H',H',H'',H''')-(mu!3$-tetrahydroborato-H,H,H,H',H'',H''')-(mu!3$-1,2-bis(2-methoxyethoxy)ethane)-di-sodium]		colorless	C2/c	15	prism	4.54	193	0.992	0.969				TEMP: at 193 K COLOR: colorless "HABIT: prism "SENS: hygroscopic
HIZDAX	Han Wang, Chong-Qing Wan, T.C.W.Mak	Dalton Trans.	2014	(H2 O1)n,n(C13 H9 Ag2 N5 O4 S3)	catena-[(mu!5$-sulfato)-(mu!3$-2-(pyrazin-2-ylsulfanyl)-6-(pyridin-2-ylsulfanyl)pyrazine)-di-silver monohydrate]		yellow	F432	209	block	5.49	173	0.416	0	The structure is disordered by symmetry.		Partial 2D input and a full 2D diagram is pending	TEMP: 173 K COLOR: yellow "HABIT: block
HIZSEQ	A.Karmakar, M.Fatima C.Guedes da Silva, A.J.L.Pombeiro	Dalton Trans.	2014	(C39 H47 N5 O21 Zn4)n	catena-[bis(mu!4$-2-(propionylamino)terephthalato)-bis(mu!3$-hydroxo)-(mu!2$-2-(propionylamino)terephthalato)-bis(N,N-dimethylformamide)-diaqua-tetra-zinc unknown solvate]		colorless	P21/c	14	prism	5.79	150	0.822	1.372	C21,C22,C23,C24,C25,C26,C27,C28,C29,N21,O23 disordered by symmetry over two configurations with occupancy 0.5; Disordered solvent molecules were not modelled and the disordered density was taken into account using the SQUEEZE/PLATON procedure.			TEMP: at 150 K COLOR: colorless "HABIT: prism
HOLQAC	P.V.Dau, S.M.Cohen	Chem.Commun.	2014	(C45 H27 N3 O16 Zn4)n	catena-[tris(mu-2-(benzoylamino)terephthalato)-(mu-oxo)-tetra-zinc unknown solvate]	alpha-IRMOF-3-AMPh	colorless	Pa-3	205	block	9.47	100	0.895	0.895	Disordered solvent molecules were not modelled and the disordered density was taken into account using the SQUEEZE/PLATON procedure.			TEMP: at 100 K COLOR: colorless "HABIT: block
HOLQAC01	P.V.Dau, S.M.Cohen	Chem.Commun.	2014	(C45 H27 N3 O16 Zn4)n	catena-(tris(mu-2-(benzoylamino)benzene-1,4-dicarboxylato)-(mu-oxo)-tetra-zinc unknown solvate)	beta-IRMOF-3-AMPh	colorless	Fm-3m	225	square	7.49	100	0.882	0	The structure is disordered; The SQUEEZE/PLATON program has been used to model some disorder.			TEMP: at 100 K COLOR: colorless "HABIT: square
HOLQIK	P.V.Dau, S.M.Cohen	Chem.Commun.	2014	(C45 H24 Cl3 N3 O16 Zn4)n	catena-[tris(mu-2-((4-chlorobenzoyl)amino)terephthalato)-(mu-oxo)-tetra-zinc unknown solvate]		yellow	Pa-3	205	square	15.44	100	0.999	0.997	Disordered solvent molecules were not modelled and the disordered density was taken into account using the SQUEEZE/PLATON procedure.			TEMP: at 100 K COLOR: yellow "HABIT: square
HOLQOQ	P.V.Dau, S.M.Cohen	Chem.Commun.	2014	(C45 H24 Cl3 N3 O16 Zn4)n	catena-(tris(mu-2-(3-chlorobenzoylamino)benzene-1,4-dicarboxylato)-(mu-oxo)-tetra-zinc unknown solvate)	IRMOF-3-AM3ClPh	red	Fm-3m	225	square	9.3	100	0.964	0	The structure is disordered; The SQUEEZE/PLATON program has been used to model some disorder.			TEMP: at 100 K COLOR: red "HABIT: square
HOLQUW	P.V.Dau, S.M.Cohen	Chem.Commun.	2014	(C90 H48 Cl6 N6 O32 Zn8)n	catena-(hexakis(mu-2-(2-chlorobenzoylamino)benzene-1,4-dicarboxylato)-bis(mu-oxo)-octa-zinc unknown solvate)	IRMOF-3-AM2ClPh	red	F-43m	216	square	8.32	100	0.968	0	The structure is disordered; The SQUEEZE/PLATON program has been used to model some disorder.			TEMP: at 100 K COLOR: red "HABIT: square
HOLRAD	P.V.Dau, S.M.Cohen	Chem.Commun.	2014	(C90 H90 N6 O32 Zn8)n	catena-(hexakis(mu-2-((cyclohexylcarbonyl)amino)benzene-1,4-dicarboxylato)-bis(mu-oxo)-octa-zinc unknown solvate)	IRMOF-3-AMCy	colorless	F-43m	216	square	13.31	100	0.905	0	The structure is disordered; The SQUEEZE/PLATON program has been used to model some disorder.			TEMP: at 100 K COLOR: colorless "HABIT: square
HOMXIR	Zhenqiang Wang, K.K.Tanabe, S.M.Cohen	Inorg.Chem.	2009	(C132 H75 N3 O39 Zn12)n,21n(C1 H1 Cl3)	catena-(tetrakis(mu!6$-4,4',4''-benzene-1,3,5-triylbenzoato)-tris(mu!4$-2-aminobenzene-1,4-dicarboxylato)-tris(mu!4$-oxo)-dodeca-zinc(ii) chloroform solvate)		beige	P63/m	176	needle	5.84	200	0.723	0	A benzene ring is partially disordered by symmetry over two sites with occupancy 0.50; A suitable position for the amino group could not be located because of a combination of disorder over the four positions of the phenyl ring and the weak diffraction quality of the crystal. The SQUEEZE/PLATON program has been used to model the amino groups and disordered solvent.			TEMP: at 200 K COLOR: beige "HABIT: needle
HOMXOX	Zhenqiang Wang, K.K.Tanabe, S.M.Cohen	Inorg.Chem.	2009	(C150 H108 N3 O42 Zn12)n,33n(C1 H1 Cl3)	catena-(tetrakis(mu!6$-4,4',4''-benzene-1,3,5-triylbenzoato)-tris(mu!4$-2-(hexanoylamino)benzene-1,4-dicarboxylato)-tris(mu!4$-oxo)-dodeca-zinc(ii) chloroform solvate)		beige	P63/m	176	needle	7.11	200	0.944	0	A benzene ring is partially disordered by symmetry over two sites with occupancy 0.50. A suitable position for the alkyl-amide group could not be located because of a combination of disorder over the four positions of the phenyl ring and the weak diffraction quality of the crystal. The SQUEEZE/PLATON program has been used to model the alkyl-amide groups and disordered solvent.		Prior to X-ray diffraction the UMCM-1-AM5 was determined to be 93% modified by NMR. Therefore the alkyl-amide groups in the structure have an occupancy of 0.90 and the polymer formula unit is given as C!49.50$H!34.30$NO!13.90$Zn!4$	TEMP: at 200 K COLOR: beige "HABIT: needle
HONXAL	M.Ranocchiari, J.A.van Bokhoven	Chimia	2013	(C54 H33 O13 P1 Zn4)n,2.15n(C3 H7 N1 O1)	catena-[bis(mu!4$-biphenyl-4,4'-dicarboxylato)-(mu!4$-2-diphenylphosphinobiphenyl-4,4'-dicarboxylato)-(mu!4$-oxo)-tetra-zinc N,N-dimethylformamide solvate]		colorless	P42/ncm	138	plate	12.69	230	0.877	0.869	The structure is severely disordered.			TEMP: 230.2 K COLOR: colorless "HABIT: plate
HOVQAM	Jing Xu, Ming-dao Zhang, Min-dong Chen	Polyhedron	2015	(C34 H25 Co1 N14)n,4.17(C1 H4 O1),13.3(H2 O1)	catena-[bis(mu-4-[4-(1H-imidazol-1-yl)phenyl]-imidazolato)-(mu-1-(imidazol-1-yl)-4-(imidazol-4-yl)benzene)-cobalt methanol solvate hydrate]		pink	Pn-3	201	block	12.05	200	0.978	0.978	C21,O1 and O2 disordered over two sites with occupancies 0.696:0.304; O4 and O5 disordered over two sites with occupancies 0.56:0.44.			TEMP: at 200 K COLOR: pink "HABIT: block
HOWTIX	S.M.Humphrey, P.K.Allan, S.E.Oungoulian, M.S.Ironside, E.R.Wise	Dalton Trans.	2009	(C23 H20 N1 O6 P1 Zn1)n,0.75n(C3 H7 N1 O1)	catena-((mu!3$-tris(4-Carboxyphenyl)phosphine-O,O',O'')-(dimethylamine)-zinc(ii) dimethylformamide solvate)		colorless	Pccn	56	hexagonal plate	8.99	180	0.961	0.959	An unspecified number of disordered dmf solvent molecules were not modelled and the disordered density was taken into account using the SQUEEZE/PLATON procedure.		The proton, necesary for charge balance purposes, was not located. The authors state it may be disordered over several sites within the structure. The proton has arbitrarily been placed on a carboxylate group in the 2D representation	TEMP: at 180 K COLOR: colorless "HABIT: hexagonal plate
HOYQIX	Jun Zhao, Wen-Wen Dong, Ya-Pan Wu, Ye-Nan Wang, Chao Wang, Dong-Sheng Li, Qi-Chun Zhang	J.Mater.Chem.A	2015	(C15 H7 Cu1 O6)n	catena-[(mu-biphenyl-3,4',5-tricarboxylato)-copper unknown solvate]		green	R-3	148	hexagon	5.09	296	0.831	0.831	The SQUEEZE/PLATON program has been used to model some disorder.	296 K		TEMP: 296 K COLOR: green "HABIT: hexagon
HUCSEF	Liangjun Li, Sifu Tang, Jon Bell, Xiaoxia Lv, Chao Wang, Yanlong Xing, Xuebo Zhao, M.Thomas	Chem.Mater.	2014	(C26 H22 Cu2 O10)n	catena-[(mu-2,3,4,5-tetramethylbenzene-1,4-diisophthalato)-diaqua-di-copper unknown solvate]		blue	I4/mmm	139	rod	6.78	293	0.835	0.835	C23 disordered by symmetry over two sites with occupancy 0.50; C24 disordered by symmetry over two sites with occupancy 0.50; Disordered solvent molecules were not modelled and the disordered density was taken into account using the SQUEEZE/PLATON procedure.	at 293 K		TEMP: at 293 K COLOR: blue "HABIT: rod
HUDCEQ	O.Karagiaridi, W.Bury, D.Fairen-Jimenez, C.E.Wilmer, A.A.Sarjeant, J.T.Hupp, O.K.Farha	Inorg.Chem.	2014	(C50 H34 N2 O8 Zn2)n	catena-((mu!8$-1,3,6,8-tetrakis(4-Benzoatophenyl)pyrene)-(mu!2$-1,4-diazabicyclo(2.2.2)octane)-di-zinc unknown solvate)	NU-505-Zn	colorless	P4/mmm	123	plate	11.69	100	0.657	0.626	The structure is disordered by symmetry. The MASK/OLEX2 program was used to model the disordered solvent molecules.			TEMP: 100.0 K COLOR: colorless "HABIT: plate
HUDMIE	Rui-Biao Lin, Tai-Yang Li, Hao-Long Zhou, Chun-Ting He, Jie-Peng Zhang, Xiao-Ming Chen	Chemical Science	2015	(C32 H30 N8 O5 Zn4)n	catena-[(mu-naphthalene-1,4'-dicarboxylato)-(mu-oxo)-bis(mu-3,3',5,5'-tetramethyl-4,4'-bipyrazolato)-tetra-zinc unknown solvate]		colorless	P42/mcm	132	block	5.24	223	0.839	0.839	The structure is disordered; Disordered solvent molecules were not modelled and the disordered density was taken into account using the SQUEEZE/PLATON procedure.			TEMP: at 223 K COLOR: colorless "HABIT: block
HUDMOK	Rui-Biao Lin, Tai-Yang Li, Hao-Long Zhou, Chun-Ting He, Jie-Peng Zhang, Xiao-Ming Chen	Chemical Science	2015	(C34 H32 N8 O5 Zn4)n	catena-[(mu-biphenyl-4,4'-dicarboxylato)-(mu-oxo)-bis(mu-3,3',5,5'-tetramethyl-4,4'-bipyrazolato)-tetra-zinc unknown solvate]		colorless	P42/mcm	132	block	7.48	273	0.649	0.649	Disordered solvent molecules were not modelled and the disordered density was taken into account using the SQUEEZE/PLATON procedure.			TEMP: at 273 K COLOR: colorless "HABIT: block
HUDWOU	Jingui Duan, M.Higuchi, Changchang Zou, Wanqin Jin, S.Kitagawa	CrystEngComm	2015	(C108 H72 Cu6 O42)n,10(C4 H9 N1 O1),4(C2 H6 O1)	catena-[tetrakis(mu!6$-3,3',3''-(benzene-1,3,5-triyl)tris(6-hydroxybenzoato))-hexa-aqua-hexa-copper N,N-dimethylacetamide ethanol solvate]		green	P-1	2	block	9.75	223	0.937	0.653	The SQUEEZE/PLATON program has been used to model some disorder.			TEMP: 223 K COLOR: green "HABIT: block
HUFKUQ	Fei-Yan Yi, Jian-Ping Li, Dai Wu, Zhong-Ming Sun	Chem.-Eur.J.	2015	(C73 H66 Cd3 N8 O21)n,4(C3 H7 N1 O1),3(C2 H7 N1),3(H2 O1)	catena-[(mu!10$-4,4'-((2-((3-(4-carboxylatophenoxy)-2,2-bis((4-carboxylatophenoxy)methyl)propoxy)methyl)-2-((4-carboxylatophenoxy)methyl)propane-1,3-diyl)bis(oxy))dibenzoato)-(mu!2$-1,1',1''-(benzene-1,3,5-triyl)tri(1H-imidazole))-bis(N,N-dimethylformamide)-tri-cadmium tris(dimethylamine) N,N-dimethylformamide solvate trihydrate]		orange	C2/m	12	block	9.4	273	0.414	0.827	The SQUEEZE/PLATON program has been used to model some disorder.			TEMP: 273 K COLOR: orange "HABIT: block
HUJGEA	Jiandong Pang, Feilong Jiang, Mingyan Wu, Caiping Liu, Kongzhao Su, Weigang Lu, Daqiang Yuan, Maochun Hong	Nat.Commun.	2015	(C46 H22 Cu4 O22)n	catena-[(mu-3,3',5,5'-tetrakis(3,5-dicarboxylatophenyl)-4,4'-dimethoxy-1,1'-biphenyl)-tetraaqua-tetra-copper unknown solvate]	FJI-H8	blue green	P42/nnm	134	block	4.88	100	0.87	0.876	Disordered solvent molecules were not modelled and the disordered density was taken into account using the SQUEEZE/PLATON procedure.			TEMP: 100 K COLOR: blue green "HABIT: block
HULCOI	Qiu-Yan Li, Ying Quan, Wei Wei, Jian Li, Han Lu, Rui Ni, Xiao-Jun Wang	Polyhedron	2015	(C66 H48 Cu6 N12 O36)n	catena-[bis(mu-5,5',5''-(benzene-1,3,5-triyltris(carbamoylimino))triisophthalato)-hexa-aqua-hexa-copper]		green	I4/m	87	block	8.6	293	0.606	0.604		293 K		TEMP: 293 K COLOR: green "HABIT: block
HUMWET	Xiaoqing Wang, Liangliang Zhang, Jie Yang, Fangna Dai, Rongming Wang, Daofeng Sun	Chem.Asian J.	2015	(H3 O1 1+)3n,n(C264 H288 B8 Cl3 Mn12 O48 3-),2.5n(C3 H7 N1 O1),5n(C4 H8 O2),27n(H2 O1)	catena-[tris(Oxonium) octakis(mu!6$-tris(4-carboxylato-2,3,5,6-tetramethylphenyl)borane)-tris(mu!4$-chloro)-dodeca-manganese N,N-dimethylformamide 1,4-dioxane solvate hydrate]	UPC-15		P432	207	block	8.69	273	0.803	0	Disordered solvent molecules were not modelled and the disordered density was taken into account using the SQUEEZE/PLATON procedure. The unit cell was found to contain a total void space of 7522 A$3! holding 2637 electrons.	absolute configuration	The formula given in the paper includes three additional H atoms (required for charge balance) with no clear indication of their location. These have been placed arbitrarily in the 2D diagram as oxonium cations	TEMP: 273.1 K ABS-CONFIG: absolute configuration
HUMWIX	Xiaoqing Wang, Liangliang Zhang, Jie Yang, Fangna Dai, Rongming Wang, Daofeng Sun	Chem.Asian J.	2015	(H3 O1 1+)3n,n(C264 H288 B8 Cl3 Cu10 Mn2 O48 3-),9n(C3 H7 N1 O1),4n(C4 H8 O2),27n(H2 O1)	catena-[tris(Oxonium) octakis(mu!6$-tris(4-carboxylato-2,3,5,6-tetramethylphenyl)borane)-tris(mu!4$-chloro)-deca-copper-di-manganese N,N-dimethylformamide 1,4-dioxane solvate hydrate]	UPC-16	colorless	P432	207	block	6.77	293	0.953	0	The single crystallographically independent metal atom of the framework is modelled with mixed occupancy Cu:Mn disorder. The sum formula of the framework is C264 H288 B8 Cl3 Cu9.98 Mn2.02 O48. Disordered solvent molecules were not modelled and the disordered density was taken into account using the SQUEEZE/PLATON procedure. The unit cell was found to contain a total void space of 6658 A$3! holdin…	293 K	The formula given in the paper includes three additional H atoms (required for charge balance) with no clear indication of their location. These have been placed arbitrarily in the 2D diagram as oxonium cations	TEMP: 293 K COLOR: colorless "HABIT: block
HUNCIE	Jianfeng Cai, Jiancan Yu, Hailong Wang, Xing Duan, Qi Zhang, Chuande Wu, Yuanjing Cui, Yang Yu, Zhiyu Wang, Banglin Chen, Guodong Qian	Cryst.Growth Des.	2015	(C48 H34 Cu2 O12)n,18n(C4 H9 N1 O1),19n(H2 O1)	catena-[(mu!8$-5',5''''-(2,5-Dimethoxy-1,4-phenylene)bis[1,1':3',1''-terphenyl]-4,4''-dicarboxylato)-diaqua-di-copper N,N-dimethylacetamide solvate nonadecahydrate]	ZJU-31	blue	I4/mmm	139	block	5.28	296	0.878	0	The structure is disordered by symmetry. Disordered N,N-dimethylacetamide and water solvent molecules were not modelled and the disordered density was taken into account using the SQUEEZE/PLATON procedure. The unit cell was found to contain a void of 36861 A$3! holding 10065 electrons.	296 K		TEMP: 296 K COLOR: blue "HABIT: block
HUPQIU	Rongming Wang, Minghui Zhang, Xiaobin Liu, Liangliang Zhang, Zixi Kang, Wen Wang, Xiaoqing Wang, Fangna Dai, Daofeng Sun	Inorg.Chem.	2015	(C96 H72 O25 Zn4)n	catena-[tris(mu-4,4'-(2,3,6,7-tetramethoxyanthracene-9,10-diyl)dibenzoato)-(mu-oxo)-tetra-zinc]	UPC-19		R-3	148		15.82	293	0.966	1.038	The structure is disordered.	293 K		TEMP: 293 K
HUQGOR	Dinesh De, S.Neogi, E.Carolina Sanudo, P.K.Bharadwaj	Chem.-Eur.J.	2015	(C93 H65 N5 O13 Zn3)n	catena-[bis(mu-4',4'',4'''-nitrilotribiphenyl-4-carboxylato)-(mu-4,4'-ethene-1,2-diyldipyridine)-(N,N-dimethylformamide)-tri-zinc unknown solvate]		yellow	P-1	2	block	11.77	100	0.735	0.735	The SQUEEZE/PLATON program has been used to model some disorder.			TEMP: 100 K COLOR: yellow "HABIT: block
HUQGUX	Dinesh De, S.Neogi, E.Carolina Sanudo, P.K.Bharadwaj	Chem.-Eur.J.	2015	(C93 H65 Cu3 N5 O13)n	catena-[bis(mu-4',4'',4'''-nitrilotribiphenyl-4-carboxylato)-(mu-4,4'-ethene-1,2-diyldipyridine)-(N,N-dimethylformamide)-tri-copper unknown solvate]		blue	P-1	2	block	10.36	100	0.725	0.725	The SQUEEZE/PLATON program has been used to model some disorder.			TEMP: 100 K COLOR: blue "HABIT: block
HUQHAE	Dinesh De, S.Neogi, E.Carolina Sanudo, P.K.Bharadwaj	Chem.-Eur.J.	2015	(C94 H67 N5 O13 Zn3)n	catena-[bis(mu-4',4'',4'''-nitrilotribiphenyl-4-carboxylato)-(mu-4,4'-ethene-1,2-diyldipyridine)-(N,N-dimethylformamide)-tri-zinc unknown solvate]		yellow	P-1	2	block	8.63	100	0.74	0.74	The SQUEEZE/PLATON program has been used to model some disorder.			TEMP: 100 K COLOR: yellow "HABIT: block
HUQHEI	Dinesh De, S.Neogi, E.Carolina Sanudo, P.K.Bharadwaj	Chem.-Eur.J.	2015	(C91 H63 N7 O13 Zn3)n	catena-[bis(mu-4',4'',4'''-nitrilotribiphenyl-4-carboxylato)-(mu-4,4'-diazene-1,2-diyldipyridine)-tri-zinc unknown solvate]		brown	P-1	2	block	5.63	100	0.74	0.74	The SQUEEZE/PLATON program has been used to model some disorder.			TEMP: 100 K COLOR: brown "HABIT: block
HUQHIM	Dinesh De, S.Neogi, E.Carolina Sanudo, P.K.Bharadwaj	Chem.-Eur.J.	2015	(C92 H64 N6 O14 Zn3)n	catena-[bis(mu-4',4'',4'''-nitrilotribiphenyl-4-carboxylato)-(mu-N-(pyridin-4-yl)isonicotinamide)-(N,N-dimethylformamide)-tri-zinc unknown solvate]		yellow	P21/c	14	block	8.35	100	0.744	0.744	The SQUEEZE/PLATON program has been used to model some disorder.			TEMP: 100 K COLOR: yellow "HABIT: block
HUQHOS	Dinesh De, S.Neogi, E.Carolina Sanudo, P.K.Bharadwaj	Chem.-Eur.J.	2015	(C91 H63 N5 O13 Zn3)n	catena-[bis(mu-4',4'',4'''-nitrilotribiphenyl-4-carboxylato)-(mu-4,4'-bipyridine)-(N,N-dimethylformamide)-tri-zinc unknown solvate]		yellow	P-1	2	block	6.15	100	0.787	0.787	The SQUEEZE/PLATON program has been used to model some disorder.			TEMP: 100 K COLOR: yellow "HABIT: block
HUQHUY	Dinesh De, S.Neogi, E.Carolina Sanudo, P.K.Bharadwaj	Chem.-Eur.J.	2015	(C94 H62 N4 O13 Zn3)n	catena-[bis(mu-4',4'',4'''-nitrilotribiphenyl-4-carboxylato)-(mu-4-(4-(pyridin-4-yl)phenyl)pyridine)-aqua-tri-zinc unknown solvate]		yellow	C2/c	15	block	10.28	100	0.627	0.626	The SQUEEZE/PLATON program has been used to model some disorder.			TEMP: 100 K COLOR: yellow "HABIT: block
HUQJAG	Dinesh De, S.Neogi, E.Carolina Sanudo, P.K.Bharadwaj	Chem.-Eur.J.	2015	(C192 H124 N14 O24 Zn6)n	catena-[tetrakis(mu-4',4'',4'''-nitrilotribiphenyl-4-carboxylato)-(mu4-(pyridin-4-yldiazenyl)pyridine)-(mu-4-(4-(pyridin-4-yl)phenyl)pyridine)-hexa-zinc unknown solvate]		brown	C2/c	15	block	8.83	100	0.765	0.765	The SQUEEZE/PLATON program has been used to model some disorder.			TEMP: 100 K COLOR: brown "HABIT: block
HUYKIV	T.J.Prior, M.J.Rosseinsky	Inorg.Chem.	2003	(C72 H66 N6 Ni3 O18)n	catena-[bis(mu!3$-Benzene-1,3,5-tricarboxylato)-hexapyridyl-tris(R-phenylethane-1,2-diol)-tri-nickel(ii)]		blue green	I4132	214	octahedron	9.98	193	0.83	0	Two phenylethanediol C atoms are refined with half occupancy.		The phenyl group was not located crystallographically	TEMP: at 193 K COLOR: blue green "HABIT: octahedron
HUYKOB	T.J.Prior, M.J.Rosseinsky	Inorg.Chem.	2003	(C66 H78 N6 Ni3 O21)n,n(C6 H14 O3)	catena-[bis(mu!3$-Benzene-1,3,5-tricarboxylato)-hexapyridyl-tris(1,2,6-hexanetriol)-tri-nickel(ii) 1,2,6-hexanetriol clathrate]		blue	I4132	214	octahedron	6.29	150	0.89	0	The hexanetriol ligands are disordered and have not been fully resolved crystallographically. Disordered guest molecules have also not been resolved.	synchrotron radiation	The quanity of guest hexanetriol molecules present is unclear	TEMP: at 150 K RADIATION: synchrotron radiation
HUYKUH	T.J.Prior, M.J.Rosseinsky	Inorg.Chem.	2003	(C58 H62 N6 Ni3 O22)n,n(C3 H8 O3)	catena-[tris(mu!3$-Benzene-1,3,5-tricarboxylato)-tetrakis(glycerol)-hexapyridyl-tri-nickel(ii) tris(glycerol) clathrate]		blue	I4132	214	octahedron	8.34	150	0.831	0	The guest molecules are disordered and are not fully resolved. The ligated glycerol is disordered such that it has a mixture of monodentate and bidentate coordination in the ratio 0.56:0.44, giving a total of 4.3 ligands per tri-nickel unit. We have represented as fully bidentate.	synchrotron radiation		TEMP: at 150 K RADIATION: synchrotron radiation
HUZFOY	Zuo-Xi Li, Tong-Liang Hu, Hong Ma, Yong-Fei Zeng, Cui-Jin Li, Ming-Liang Tong, Xian-He Bu	Cryst.Growth Des.	2010	(C78 H54 Cd1 N12 2+)n,2n(Cl1 O4 1-)	catena-[tris(mu!2$-4,4'-bis(Benzimidazol-1-yl)biphenyl-N$3!,N'$3!)-cadmium(ii) diperchlorate]		colorless	R32	155	block	8.45	113	0.952	0.952	The perchlorate anion is disordered over two sites with occupancies 0.50:0.50.		The authors state the framework has no solvent molecules in the structure, giving (by their calculations) a void space per unit cell of 4034 A$3!, or 52.4% of cell volume	TEMP: at 113 K COLOR: colorless "HABIT: block
HUZSOL	Ruqiang Zou, A.I.Abdel-Fattah, Hongwu Xu, A.K.Burrell, T.E.Larson, T.M.McCleskey, Qiang Wei, M.T.Janicke, D.D.Hickmott, T.V.Timofeeva, Yusheng Zhao	Cryst.Growth Des.	2010	(C60 H44 N2 Na2 O15 Zn3)n,n(C3 H7 N1 O1),3n(H2 O1)	catena-(bis(mu!5$-benzene-1,3,5-tribenzoato)-(mu!4$-oxo)-bis(mu!2$-N,N-dimethylformamide)-di-sodium(i)-tri-zinc(ii) N,N-dimethylformamide solvate trihydrate)		colorless	Pnma	62	block	11.81	273	0.996	0.996				TEMP: at 273 K COLOR: colorless "HABIT: block
HUZSOL01	Ruqiang Zou, A.I.Abdel-Fattah, Hongwu Xu, A.K.Burrell, T.E.Larson, T.M.McCleskey, Qiang Wei, M.T.Janicke, D.D.Hickmott, T.V.Timofeeva, Yusheng Zhao	Cryst.Growth Des.	2010	(C60 H44 N2 Na2 O15 Zn3)n,n(C3 H7 N1 O1),3n(H2 O1)	catena-(bis(mu!5$-benzene-1,3,5-tribenzoato)-(mu!4$-oxo)-bis(mu!2$-N,N-dimethylformamide)-di-sodium(i)-tri-zinc(ii) N,N-dimethylformamide solvate trihydrate)		colorless	Pnma	62	block	5.19	273	0.996	0	Disordered solvent molecules were not modelled and the disordered density was taken into account using the SQUEEZE/PLATON procedure.			TEMP: at 273 K COLOR: colorless "HABIT: block
IBOZEG	Fan Yu, Bao Li	CrystEngComm	2011	(C68 H64 Cu2 N8 O16)n	catena-((mu!4$-4-(3-(pyridin-4-yloxy)-2,2-bis((pyridin-4-yloxy)methyl)propoxy)pyridine)-(mu!2$-4-(3-(pyridin-4-yloxy)-2,2-bis((pyridin-4-yloxy)methyl)propoxy)pyridine)-dibenzoato-diacetato-di-copper(ii) unknown clathrate)		blue	P21212	18	block	9.62	293	0.965	0.965	The disordered unknown solvent molecules were not modelled and the disordered density was taken into account using the SQUEEZE/PLATON procedure.	at 293 K		TEMP: at 293 K COLOR: blue "HABIT: block
ICAGOK	Xiu-Mei Zhang, Yan-Qin Wang, You Song, En-Qing Gao	Inorg.Chem.	2011	(C36 H24 Cu2 N6 O6)n	catena-(bis(mu!3$-4-(pyridin-4-yl)benzoato)-(mu!2$-4-(pyridin-4-yl)benzoato)-(mu!2$-azido)-di-copper(ii))		green	P21/c	14	block	4.85	293	0.838	0	C1,C10,C11,C2,C3,C4,C5,C6,C7,C8,C9 and C1',C10',C11', C2',C3',C4',C5',C6',C7',C8',C9' disordered over two sites with occupancies 0.54:0.46; C13,C14,C15,C16,C17,C18,C19,C20,C21,C22,C23,C24, O3,O4 and C13',C14',C15',C16',C17',C18',C19',C20',C21',C22',C23',C24', O3',O4' disordered over two sites with occupancies 0.690:0.310.	at 293 K	We calculate 33% void space in the structure	TEMP: at 293 K COLOR: green "HABIT: block
ICAQIO	N.Klein, I.Senkovska, I.A.Baburin, R.Grunker, U.Stoeck, M.Schlichtenmayer, B.Streppel, U.Mueller, S.Leoni, M.Hirscher, S.Kaskel	Chem.-Eur.J.	2011	(C138 H84 Co6 N6 O24)n	catena-(tetrakis(mu!6$-benzene-1,3,5-tribenzoate)-tris(mu!2$-4,4'-bipyridine)-hexa-cobalt)		violet	Pm-3n	223	block	6.77	293	0.403	0.403	C10A,C9A and C10B,C9B disordered over two sites with occupancies 0.577:0.423; The SQUEEZE/PLATON program has been used to model disordered guest solvent molecules.	at 293 K		TEMP: at 293 K COLOR: violet "HABIT: block
ICAQOU	N.Klein, I.Senkovska, I.A.Baburin, R.Grunker, U.Stoeck, M.Schlichtenmayer, B.Streppel, U.Mueller, S.Leoni, M.Hirscher, S.Kaskel	Chem.-Eur.J.	2011	(C138 H84 Cu6 N6 O24)n	catena-(tetrakis(mu!6$-benzene-1,3,5-tribenzoate)-tris(mu!2$-4,4'-bipyridine)-hexa-copper)		blue	Pm-3n	223	block	9.31	293	0.413	0.413	C8A,C9A and C8B,C9B disordered over two sites with occupancies 0.607:0.393; The SQUEEZE/PLATON program has been used to model disordere3d solvent guest molecules.	synchrotron radiation; at 293 K		TEMP: at 293 K RADIATION: synchrotron radiation
ICAQUA	N.Klein, I.Senkovska, I.A.Baburin, R.Grunker, U.Stoeck, M.Schlichtenmayer, B.Streppel, U.Mueller, S.Leoni, M.Hirscher, S.Kaskel	Chem.-Eur.J.	2011	(C138 H84 N6 O24 Zn6)n	catena-(tetrakis(mu!6$-benzene-1,3,5-tribenzoato)-bis(mu!2$-4,4'-bipyridine)-hexa-zinc)		white	Pm-3n	223	block	4.46	293	0.406	0.406	The structure is disordered. The SQUEEZE/PLATON program has been used to model disordered guest solvent molecules.	synchrotron radiation; at 293 K		TEMP: at 293 K RADIATION: synchrotron radiation
ICARAH	N.Klein, I.Senkovska, I.A.Baburin, R.Grunker, U.Stoeck, M.Schlichtenmayer, B.Streppel, U.Mueller, S.Leoni, M.Hirscher, S.Kaskel	Chem.-Eur.J.	2011	(C180 H120 Cu6 N6 O36)n	catena-(tetrakis(mu!6$-benzene-1,3,5-tribenzoato)-tris(mu!2$-diethyl (R,S)-4,4'-biquinoline-3,3'-dicarboxylato)-hexa-copper)		blue	R3cr	161	block	13.83	293	0.536	0.536	The SQUEEZE/PLATON program has been used to model disordered solvent guest molecules.	synchrotron radiation; at 293 K		TEMP: at 293 K RADIATION: synchrotron radiation
ICAREL	N.Klein, I.Senkovska, I.A.Baburin, R.Grunker, U.Stoeck, M.Schlichtenmayer, B.Streppel, U.Mueller, S.Leoni, M.Hirscher, S.Kaskel	Chem.-Eur.J.	2011	(C261 H171 Cu12 N9 O51)n	catena-(octakis(mu!6$-benzene-1,3,5-tribenzoato)-triaqua-nonapyridine-dodeca-copper)			R-3m	166		7.65	293	0.623	0.623	The structure is disordered. The SQUEEZE/PLATON program has been used to model some disordered guest solvent molecules.	synchrotron radiation; at 293 K		TEMP: at 293 K RADIATION: synchrotron radiation
ICAROV	N.Klein, I.Senkovska, I.A.Baburin, R.Grunker, U.Stoeck, M.Schlichtenmayer, B.Streppel, U.Mueller, S.Leoni, M.Hirscher, S.Kaskel	Chem.-Eur.J.	2011	(C138 H84 N6 Ni6 O24)n	catena-(tetrakis(mu!6$-benzene-1,3,5-tribenzoato)-bis(mu!2$-4,4'-bipyridine)-hexa-nickel)		green	Pm-3n	223	block	5.87	293	0.407	0.407	The structure is disordered. The SQUEEZE/PLATON program has been used to model disordered guest solvent molecules.	synchrotron radiation; at 293 K		TEMP: at 293 K RADIATION: synchrotron radiation
ICISAP	P.D.C.Dietzel, R.Blom, H.Fjellvag	Dalton Trans.	2006	(C24 H18 O22 Sc3 1+)n,n(N1 O3 1-)	catena-(tris(mu!4$-2,5-dihydroxyterephthalato)-(mu!3$-oxo)-triaqua-tri-scandium(iii) nitrate unknown solvate)		light yellow	P63/mmc	194	hexagonal bipyramid	4.66	100	0.872	0	The two hydroxyl positions are disordered over all four available sites with occupancy 0.50. The anion and solvent contributions could not be localised and their contribution was removed using PLATON/SQUEEZE.			TEMP: at 100 K COLOR: light yellow "HABIT: hexagonal bipyramid
ICITEU	A.C.Sudik, A.P.Cote, A.G.Wong-Foy, M.O'Keeffe, O.M.Yaghi	Angew.Chem.,Int.Ed.	2006	(C156 H108 Fe12 N12 O76 S12 8-)n,8n(C2 H8 N1 1+),13n(H2 O1),8n(C3 H7 N1 O1)	catena-(octakis(Dimethylammonium) hexakis(mu!4$-4,4'-biphenyldicarboxylato)-tetrakis(mu!3$-oxo)-hexakis(cis-1,2-bis(4-pyridyl)ethane)-dodecakis(sulfato-O,O')-dodeca-iron dimethylformamide clathrate tridecahydrate)		orange	F-43m	216	octahedron	10.05	258	0.652	0	The cations are reported as completely disordered and do not appear to have been modelled.			TEMP: at 258 K COLOR: orange "HABIT: octahedron
IDIWOH	K.Barthelet, J.Marrot, D.Riou, G.Ferey	Angew.Chem.,Int.Ed.	2002	(C8 H4 O5 V1)n	catena-((mu!4$-terephthalato)-(mu!2$-oxo)-vanadium(iv))		brown	Pnma	62	parallelepiped	7.66	296	1	1		at 296 K		TEMP: at 296 K COLOR: brown "HABIT: parallelepiped
IDIWOH01	Xiqu Wang, Lumei Liu, A.J.Jacobson	Angew.Chem.,Int.Ed.	2006	(C8 H4 O5 V1)n	catena-((mu!4$-benzene-1,4-dicarboxylato)-(mu!2$-oxo)-vanadium(iv))		brown	Pnma	62	prism	3.57	223	1	1			32% void space in the structure	TEMP: at 223 K COLOR: brown "HABIT: prism
IDIWOH02	D.E.P.Vanpoucke, J.W.Jaeken, S.De Baerdemacker, K.Lejaeghere, V.Van Speybroeck	Beilstein J.Nanotech.	2014	(C32 H16 O20 V4)n	catena-(tetrakis(mu!4$-Terephthalato)-tetrakis(mu!2$-oxo)-tetra-vanadium)	MIL-47(V)		P1	1		0	0	0.988	0			This crystal structure was optimized using ab-initio density functional theory calculations (VASP program, PBE+D3, 2x2x6 k-points, 500 eV kinetic energy cutoff, Volume optimization by means of a fit to the Rose-Vinet Equation of state, 5 inequivalent ferromagnetic and antiferromagnetic spinconfiguration of the system)
IDIWOH03	D.E.P.Vanpoucke, J.W.Jaeken, S.De Baerdemacker, K.Lejaeghere, V.Van Speybroeck	Beilstein J.Nanotech.	2014	(C32 H16 O20 V4)n	catena-(tetrakis(mu!4$-Terephthalato)-tetrakis(mu!2$-oxo)-tetra-vanadium)	MIL-47(V)		P1	1		0	0	0.987	0
IDIWOH04	D.E.P.Vanpoucke, J.W.Jaeken, S.De Baerdemacker, K.Lejaeghere, V.Van Speybroeck	Beilstein J.Nanotech.	2014	(C32 H16 O20 V4)n	catena-(tetrakis(mu!4$-Terephthalato)-tetrakis(mu!2$-oxo)-tetra-vanadium)	MIL-47(V)		P1	1		0	0	0.986	0
IDIWOH05	D.E.P.Vanpoucke, J.W.Jaeken, S.De Baerdemacker, K.Lejaeghere, V.Van Speybroeck	Beilstein J.Nanotech.	2014	(C32 H16 O20 V4)n	catena-(tetrakis(mu!4$-Terephthalato)-tetrakis(mu!2$-oxo)-tetra-vanadium)	MIL-47(V)		P1	1		0	0	0.987	0
IDIWOH06	D.E.P.Vanpoucke, J.W.Jaeken, S.De Baerdemacker, K.Lejaeghere, V.Van Speybroeck	Beilstein J.Nanotech.	2014	(C32 H16 O20 V4)n	catena-(tetrakis(mu!4$-Terephthalato)-tetrakis(mu!2$-oxo)-tetra-vanadium)	MIL-47(V)		P1	1		0	0	0.987	0
IFEROC	Dong-Xu Xue, A.J.Cairns, Y.Belmabkhout, L.Wojtas, Yunling Liu, M.H.Alkordi, M.Eddaoudi	J.Am.Chem.Soc.	2013	(C42 H28 F6 O19 Tb3 1-)n,n(C2 H8 N1 1+)	catena-(Dimethylammonium tris(mu!4$-3,3'-difluorobiphenyl-4,4'-dicarboxylato)-tetrakis(mu!3$-hydroxo)-triaqua-tri-terbium unknown solvate)		colorless	Fm-3m	225	polyhedron	7.32	100	0.944	0.949	The structure is disordered by symmetry. The cation and some solvent were taken into account using PLATON/SQUEEZE.	twin		TEMP: 100 K OTHER-DIFF: twin
IFESAP	Dong-Xu Xue, A.J.Cairns, Y.Belmabkhout, L.Wojtas, Yunling Liu, M.H.Alkordi, M.Eddaoudi	J.Am.Chem.Soc.	2013	(C42 H31 F3 O19 Tb3 1-)n,n(C2 H8 N1 1+)	catena-(Dimethylammonium tris(mu!4$-3-fluorobiphenyl-4,4'-dicarboxylato)-tetrakis(mu!3$-hydroxo)-triaqua-tri-terbium unknown solvate)		colorless	Fm-3m	225	polyhedron	4.02	100	0.906	0.87	The SQUEEZE/PLATON program was used to model the cation and some disordered solvent. The structure is disordered by symmetry.			TEMP: 100 K COLOR: colorless "HABIT: polyhedron
IGAGUU	S.K.Elsaidi, M.H.Mohamed, L.Wojtas, A.J.Cairns, M.Eddaoudi, M.J.Zaworotko	Chem.Commun.	2013	(C126 H126 Cl14 Cr9 Cu6 N18 O48)n,17.5n(H2 O1)	catena-(dodecakis(mu!3$-4-Aminobenzoato-N,O,O')-bis(mu!3$-chloro)-tris(mu!3$-oxo)-hexakis(mu!2$-4-aminobenzoato-O,O')-nona-aqua-dodecachloro-nona-chromium-hexa-copper hydrate)		green	P63/mcm	193	block	9.31	100	0.711	0.711	The SQUEEZE/PLATON program has been used to model some disordered solvent, possibly dichloromethane and some further water molecules.	synchrotron radiation		TEMP: at 100 K RADIATION: synchrotron radiation
IGORUS	S.Furukawa, K.Hirai, Y.Takashima, K.Nakagawa, M.Kondo, T.Tsuruoka, O.Sakata, S.Kitagawa	Chem.Commun.	2009	(C48 H24 N4 O12 Zn2)n,8.5n(C3 H7 N1 O1)	catena-(bis(mu!4$-Naphthalene-1,4-dicarboxylato)-(mu!2$-N,N'-bis(4-pyridyl)naphthalene-1,8:4,5-tetracarboxydiimide)-di-zinc N,N-dimethylformamide solvate)		orange	P4/mmm	123	prism	7.48	223	0.995	0	The structure is disordered by symmetry. The DMF solvent molecules were not modelled.			TEMP: at 223.1 K COLOR: orange "HABIT: prism
IHABAW	Kelong Zhu, C.A.O'Keefe, V.Nicholas Vukotic, R.W.Schurko, S.J.Loeb	Nature Chemistry	2015	(C144 H84 N12 O26 Zn8 3+)n,3n(C16 H32 O8),3n(B1 F4 1-),16n(C2 H6 O1)	catena-[bis(mu-oxo)-tris(mu-4,4',4'',4'''-{1,4-phenylenebis[(1H-benzimidazol-3-ium-2,4,7-triyl)]}tetrabenzoato)-octa-zinc tris(24-crown-8) tris(tetrafluoroborate) ethanol solvate]		pale yellow	R32	155	block	7.82	150	0.934	0.933	Disordered tetrafluoroborate anions and ethanol solvent molecules were not modelled and the disordered density was taken into account using the SQUEEZE/PLATON procedure.			TEMP: 150 K COLOR: pale yellow "HABIT: block "SOURCE-CHEM: solvothermal synthesis
IHENUG	A.C.-H Sue, R.V.Mannige, Hexiang Deng, D.Cao, Cheng Wang, F.Gandara, J.Fraser Stoddart, S.Whitelam, O.M.Yaghi	Proc.Nat.Acad.Sci.USA	2015	(C150 H144 O43 Zn4)n,n(C36 H32 N4 4+),4n(N1 O3 1-)	catena-[bis(mu!4$-4,4'-(2,3,5,6,8,9,11,12,21,22,24,25,27,28,30,31-hexadecahydro-15,19,14-(buta[1,3]diene[1,1,4]triyl)-1,4,7,10,13,20,23,26,29,32-benzodecaoxacyclotetratriacontine-33,36-diyldi(ethyne-2,1-diyl))dibenzoato)-(mu!4$-[2]-(4,4'-[2,3,5,6,8,9,11,12,21,22,24,25,27,28,30,31-hexadecahydro-15,19,14-(buta[1,3]diene[1,1,4]triyl)-1,4,7,10,13,20,23,26,29,32-benzodecaoxacyclotetratriacontine-33,36…	MOF-2000	red	Im-3	204	block	12.25	298	0.664	0	The structure is extensively disordered, with only the MOF-2000 framework backbone being modelled. Disordered crown ether parts of the ligand, the associated catenated ring, anions and solvent molecules were not modelled and the disordered density was taken into account using the SQUEEZE/PLATON procedure. The unit cell was found to contain a void of 15045 A$3! holding 177 electrons.	synchrotron; 298 K		TEMP: 298 K RADIATION: synchrotron
IKOLIF	Guihong Yu, Ruiqing Li, Zhihua Leng, Shucai Gan	J.Mol.Struct.	2016	(C45 H28 Cl2 O6 Zn2)n	catena-[(mu-hydrogen 4',4'',4'''-(benzene-1,3,5-triyl)tri((1,1'-biphenyl)-4-carboxylato))-dichloro-di-zinc]		colorless	P6122	178	block	7.62	293	0.611	0.611		293 K	A hydrogen atom has been added arbitarily to the 2D diagram to balance the charges	TEMP: 293 K COLOR: colorless "HABIT: block
ILAMAK	C.E.Willans, S.French, K.M.Anderson, L.J.Barbour, J.-A.Gertenbach, G.O.Lloyd, R.J.Dyer, P.C.Junk, J.W.Steed	Dalton Trans.	2011	(C48 H60 Co1 N12 2+)n,2n(Cl1 1-),n(H2 O1)	catena-(bis(mu!3$-1,3,5-tris(1H-imidazol-1-ylmethyl)-2,4,6-triethylbenzene)-cobalt dichloride monohydrate)		blue pink	P63/m	176	block	12.89	120	0.933	0.932	The structure is disordered by symmetry.			TEMP: at 120 K COLOR: blue pink "HABIT: block
ILITON	P.M.Barron, C.A.Wray, Chunhua Hu, Zhiyong Guo, Wonyoung Choe	Inorg.Chem.	2010	(C60 H38 N6 O9 Zn3)n	catena-((mu!9$-5,10,15,20-tetrakis(4-Carboxylatophenyl)porphyrinato)-(mu!2$-2,2'-dimethyl-4,4'-bipyridine)-aqua-tri-zinc unknown solvate)		purple	Cmcm	63	prism	4.1	296	0.503	0.503	O4,Zn1 disordered by symmetry over two sites with occupancy 0.50; C27,C28,C30,C31,C32 disordered by symmetry over two sites with occupancy 0.50. The SQUEEZE/PLATON program has been used to model some disorder.	twin; at 296 K		TEMP: at 296 K OTHER-DIFF: twin
ILITUT	P.M.Barron, C.A.Wray, Chunhua Hu, Zhiyong Guo, Wonyoung Choe	Inorg.Chem.	2010	(C60 H40 Co3 N6 O10)n	catena-((mu!9$-5,10,15,20-tetrakis(4-Carboxylatophenyl)porphyrinato)-(mu!2$-2,2'-dimethyl-4,4'-bipyridine)-diaqua-tri-cobalt unknown solvate)		red	Cmcm	63	prism	9.96	296	0.507	0.507	C27,C28,C30,C31,C32 disordered by symmetry over two sites with occupancy 0.50. The SQUEEZE/PLATON program was used to model the disordered solvent.	at 296 K		TEMP: at 296 K COLOR: red "HABIT: prism
IMIDZB10	O.Karagiaridi, M.B.Lalonde, W.Bury, A.A.Sargeant, O.K.Farha, J.T.Hupp	J.Am.Chem.Soc.	2012	(C6 H6 N4 Zn1)n	catena-(bis(mu!2$-Imidazolato)-zinc)	SALEM-2	colorless	I-43m	217	block	2.69	100	0.834	0.834	C2 and C2A disordered over two sites with occupancies 0.63:0.37.			TEMP: at 100.0 K COLOR: colorless "HABIT: block
IMUKUW	D.W.Smithenry, S.R.Wilson, K.S.Suslick	Inorg.Chem.	2003	(C312 H228 N24 O26 Zn14)n,12.75n(C6 H5 Cl1),16.75n(C3 H7 N1 O1)	catena-(hexakis(mu!5$-5,15-bis(4-Carboxyphenyl)-10,20-dimesitylporphyrinato)-bis(mu!4$-oxo)-tetradeca-zinc(ii) chlorobenzene N,N-dimethylformamide solvate)		purple	Fd-3	203	prism	19.22	295	0.826	0	The central porphyrin coordinated Zn atom is disordered equally over two sites by symmetry. The disordered solvent molecules were not modelled and the disordered density was taken into account using the BYPASS/SQUEEZE/PLATON procedure.	at 295 K	There are 12.75 chlorobenzene solvent molecules and 16.75 dimethylformamide solvent molecules, these were not drawn in the 2D diagram due to program restrictions	TEMP: at 295 K COLOR: purple "HABIT: prism
IMULAD	Dong Mok Shin, In Su Lee, Dahye Cho, Young Keun Chung	Inorg.Chem.	2003	(C56 H48 Co2 N12 S4)n	catena-(tetrakis(mu!2$-1-Methyl-1,2-bis(pyrid-4-yl)ethene-N,N')-tetrakis(isothiocyanato)-di-cobalt unknown solvate)		scarlet	P-421c	114	needle	11.77	293	0.962	0.962	The unidentified disordered solvent molecules were not modelled and account for 49% of the crystal volume.	at 293 K		TEMP: at 293 K COLOR: scarlet "HABIT: needle "SENS: air-sensitive
INIGIX	Shufang Chen, Jiyong Hu, Jin'an Zhao, Jin Zhang, Huaibin Yu, Shuangcheng Zhi, Junshuai Zhang, Zhanqiang Gong	CrystEngComm	2016	(C46 H46 N4 Ni1 O8 S2)n	catena-[bis(mu-3-{2-butyl-1-[(4-carboxyphenyl)methyl]-1H-imidazol-5-yl}-2-[(thiophen-2-yl)methyl]prop-2-enoato)-nickel unknown solvate]		green	Ia-3d	230	block	8.69	100	0.949	0.947	Disordered solvent molecules were not modelled and the disordered density was taken into account using the SQUEEZE/PLATON procedure.			TEMP: 100 K COLOR: green "HABIT: block
INIGOD	Shufang Chen, Jiyong Hu, Jin'an Zhao, Jin Zhang, Huaibin Yu, Shuangcheng Zhi, Junshuai Zhang, Zhanqiang Gong	CrystEngComm	2016	(C46 H46 N4 O8 S2 Zn1)n,n(H2 O1)	catena-[bis(mu-3-{2-butyl-1-[(4-carboxyphenyl)methyl]-1H-imidazol-5-yl}-2-[(thiophen-2-yl)methyl]prop-2-enoato)-zinc unknown solvate monohydrate]		colorless	Ia-3d	230	block	7.16	100	0.962	0.958	C21',C22',C23' and C21,C22,C23 disordered over two sites with occupancies 0.553:0.447; C4',C5',C6',C7',S1' and C4,C5,C6,C7,S1 disordered over two sites with occupancies 0.520:0.480; Disordered solvent molecules were not modelled and the disordered density was taken into account using the SQUEEZE/PLATON procedure.			TEMP: 100 K COLOR: colorless "HABIT: block
IPAFOV	Gui-lei Liu, Cai-Ming Liu, Hui Li	J.Solid State Chem.	2011	(C18 H18 F2 Mn1 O6)n	catena-(bis(mu!2$-(E)-3-(3-Fluorophenyl)acrylic acid)-diaqua-manganese(ii))			P21/c	14		4.94	296	0.775	0		at 296 K		TEMP: at 296 K
IQECIS	Lei Zhang, Wenbin Yang, Xiao-Yuan Wu, Can-Zhong Lu, Wen-Zhe Chen	Chem.-Eur.J.	2016	(C63 H39 Co4 F3 N12 O10 S1)n,4.5n(C4 H9 N1 O1),5n(H2 O1)	catena-((mu-4,4',4''-benzene-1,3,5-triyltribenzoato)-bis(mu-2,4,6-tris(4-pyridyl)-1,3,5-triazine)-tris(mu-fluoro)-(mu-sulfato)-tetra-cobalt dimethylacetamide solvate pentahydrate)	MFOF-1	red	P213	198	octahedral	6.05	100	0.954	0.954		absolute configuration		TEMP: 100 K ABS-CONFIG: absolute configuration
IQIMUS	Xiao Li, Liu Yang, Liang Zhao, Xin-Long Wang, Kui-Zhan Shao, Zhong-Min Su	Cryst.Growth Des.	2016	(C68 H44 Cd2 N8 O8)n,n(C5 H11 N1 O1)	catena-[bis(mu-1,1'-(anthracene-9,10-diyl)di(1H-imidazole))-bis(mu-biphenyl-4,4'-dicarboxylato)-di-cadmium N,N-diethylformamide solvate]		yellow	C2/m	12	block	6.21	296	0.879	0	Disordered N,N-diethylformamide solvent molecules were not modelled and the disordered density was taken into account using the SQUEEZE/PLATON procedure.	296 K		TEMP: 296 K COLOR: yellow "HABIT: block
IQOKAC	M.Bosch, Xing Sun, Shuai Yuan, Ying-Pin Chen, Qi Wang, Xuan Wang, Hong-Cai Zhou	Eur.J.Inorg.Chem.	2016	(C56 H32 Mn3 O16 Si2)n	catena-(bis(mu-tetrakis(4-carboxylatophenyl)silane)-tri-manganese unknown solvate)	PCN-47	colorless	P2/c	13	Block	8.14	110	0.944	0.944	The SQUEEZE/PLATON program was used to model some disordered solvent (and possibly cations).			TEMP: 110 K COLOR: colorless "HABIT: Block
IQOKIK	M.Bosch, Xing Sun, Shuai Yuan, Ying-Pin Chen, Qi Wang, Xuan Wang, Hong-Cai Zhou	Eur.J.Inorg.Chem.	2016	(C174 H116 Mn9 N2 O52 Si6)n	catena-(tetrakis(mu-tetrakis(4-carboxylatophenyl)silane)-bis(mu-hydrogen tetrakis(4-carboxylatophenyl)silane)-diaqua-bis(dimethylformamide)-nona-manganese unknown solvate)	PCN-49	colorless	P-1	2	Block	8.06	110	0.991	0.989	The SQUEEZE/PLATON program was used to model some disordered solvent (and possibly cations).			TEMP: 110 K COLOR: colorless "HABIT: Block
ISOHEE	Ming Yang, Feilong Jiang, Qihui Chen, Youfu Zhou, Rui Feng, Kecai Xiong Maochun Hong	CrystEngComm	2011	(C36 H22 N6 O8 Zn2)n	catena-[(mu!6$-azobenzene-3,3',5,5'-tetracarboxylato)-bis(mu!2$-4,4'-bipyridyl)-di-zinc]			P2/m	10		7.35	293	0.847	0.847		at 293 K		TEMP: at 293 K
ISOJOQ	Liping Wang, Tianyou Song, Liangliang Huang, Jianing Xu, Chao Li, Caixia Ji, Liang Shan, Li Wang	CrystEngComm	2011	(C20 H28 In1 O8)n	catena-[bis(mu!2$-D-Camphorato)-indium]		colorless	P43212	96	block	6.58	293	0.989	0.989		at 293 K		TEMP: at 293 K COLOR: colorless "HABIT: block
ITEZAJ	N.Klein, C.Herzog, M.Sabo, I.Senkovska, J.Getzschmann, S.Paasch, M.R.Lohe, E.Brunner, S.Kaskel	Phys.Chem.Chem.Phys.(PCCP)	2010	(C30 H24 N2 Ni2 O8)n	catena-(bis(mu!4$-Naphthalene-1,6-dicarboxylato)-(mu!2$-1,4-diazabicyclo(2.2.2)octane)-di-nickel unknown solvate)		green	P4/n	85	block	15.46	293	0.685	0.685	The SQUEEZE/PLATON program has been used to model some disordered unspecified solvent molecules.	at 293 K		TEMP: at 293 K COLOR: green "HABIT: block "SOURCE-CHEM: DMF/MeOH "SENS: air-sensitive
ITUVEZ	Sihai Yang, S.K.Callear, A.J.Ramirez-Cuesta, W.I.F.David, Junliang Sun, A.J.Blake, N.R.Champness, M.Schroder	Faraday Discuss.	2011	(C2 H8 N1 1+)n,n(C22 H10 In1 O8 1-),2n(C3 H7 N1 O1),4n(H2 O1)	catena-[Dimethylammonium (mu!4$-1,1':4',1''-terphenyl-3,3'',5,5''-tetracarboxylato)-indium(iii) dimethylformamide solvate tetrahydrate]	NOTT-210 dimethylformamide solvate tetrahydrate	colorless	P42/mmc	131	octahedron	6.21	293	0.981	0.981	C7 disordered by symmetry over two sites with occupancy 0.50. Disordered cations and solvent molecules were not modelled and the disordered density was taken into account using the SQUEEZE/PLATON procedure. The unit cell was found to contain a void of 1914 A$3! holding 570 electrons. The formula was calculated from TGA combined with elemental analysis data.	at 293 K		TEMP: at 293 K COLOR: colorless "HABIT: octahedron
ITUVID	Sihai Yang, S.K.Callear, A.J.Ramirez-Cuesta, W.I.F.David, Junliang Sun, A.J.Blake, N.R.Champness, M.Schroder	Faraday Discuss.	2011	(C2 H8 N1 1+)n,n(C24 H14 In1 O8 1-),2n(C3 H7 N1 O1),2n(H2 O1)	catena-[Dimethylammonium (mu!4$-2',5'-dimethyl-1,1':4',1''-terphenyl-3,3'',5,5''-tetracarboxylato)-indium(iii) dimethylformamide solvate dihydrate]	NOTT-211 dimethylformamide solvate dihydrate	colorless	P42/mmc	131	octahedron	8.18	293	0.968	0.965	The central 2,5-dimethylbenzene-1,4-diyl unit of the tetracarboxylate ligand is disordered by symmetry. Disordered cations and solvent molecules were not modelled and the disordered density was taken into account using the SQUEEZE/PLATON procedure. The unit cell was found to contain a void of 1660 A$3! holding 28 electrons. The formula was calculated from TGA combined with elemental analysis data.	at 293 K		TEMP: at 293 K COLOR: colorless "HABIT: octahedron
ITUVUP	Sihai Yang, S.K.Callear, A.J.Ramirez-Cuesta, W.I.F.David, Junliang Sun, A.J.Blake, N.R.Champness, M.Schroder	Faraday Discuss.	2011	(C2 H8 N1 1+)n,n(C26 H12 In1 O8 1-),2n(C3 H7 N1 O1),2n(H2 O1)	catena-[Dimethylammonium (mu!4$-5,5'-naphthalene-1,4-diyldibenzene-1,3-dicarboxylato)-indium(iii) dimethylformamide solvate dihydrate]	NOTT-213 dimethylformamide solvate dihydrate	colorless	P42/mmc	131	octahedron	4.58	293	0.995	0.993	The central naphthalene-1,4-diyl unit of the tetracarboxylate ligand is disordered by symmetry. Disordered cations and solvent molecules were not modelled and the disordered density was taken into account using the SQUEEZE/PLATON procedure. The unit cell was found to contain a void of 1529 A$3! holding 30 electrons. The formula was calculated from TGA combined with elemental analysis data.	at 293 K		TEMP: at 293 K COLOR: colorless "HABIT: octahedron
IVEKEA	Hai-Ning Wang, Xing Meng, Guang-Sheng Yang, Xin-Long Wang, Kui-Zhan Shao, Zhong-Min Su, Chun-Gang Wang	Chem.Commun.	2011	(C42 H32 Cu4 N6 O18)n,12n(C4 H9 N1 O1)	catena-(tetrakis(mu!4$-5-Aminoisophthalato)-(mu!2$-4,4'-bipyridine)-diaqua-tetra-copper dimethylacetamide solvate)		green	Fm-3m	225	block	9.63	296	0.895	0.895	A carbon and nitrogen atom of the aminophenyl moiety are disordered. The bipyridine ligand is disordered by symmetry. The dimethylacetamide molecules were taken into account using PLATON/SQUEEZE.	at 296 K		TEMP: at 296 K COLOR: green "HABIT: block
IXELAZ	M.K.Sharma, P.K.Bharadwaj	Inorg.Chem.	2011	(C36 H28 Cd1 Cl2 N12 O8)n	catena-(bis(mu!2$-1,2-bis(4-(imidazol-1-yl)phenyl)diazene)-bis(perchlorato)-cadmium)		orange	C2/m	12	block	18.74	100	0.781	0.781	Cl1 disordered by symmetry over two sites with occupancy 0.50.			TEMP: at 100 K COLOR: orange "HABIT: block
IYIHOO	Chang Yeon Lee, Youn-Sang Bae, Nak Cheon Jeong, O.K.Farha, A.A.Sarjeant, C.L.Stern, P.Nickias, R.Q.Snurr, J.T.Hupp, S.T.Nguyen	J.Am.Chem.Soc.	2011	(C51 H34 Br2 N2 O8 Si1 Zn2)n	catena-((mu!8$-1,2,4,5-tetrakis(4-carboxylatophenyl)-3,6-dibromobenzene)-(mu!2$-4,4'-ethene-1,2-diylbis(3-(trimethylsilylethynyl)pyridine))-di-zinc unknown solvate)		orange	P2/m	10	tablet	9.97	100	0.671	0.671	The structure is extensively disordered by symmetry. The SQUEEZE/PLATON program has been used to model some disorder.			TEMP: at 100 K COLOR: orange "HABIT: tablet
IYIHUU	Chang Yeon Lee, Youn-Sang Bae, Nak Cheon Jeong, O.K.Farha, A.A.Sarjeant, C.L.Stern, P.Nickias, R.Q.Snurr, J.T.Hupp, S.T.Nguyen	J.Am.Chem.Soc.	2011	(C50 H26 Br2 N2 O8 Zn2)n,6n(C3 H7 N1 O1)	catena-((mu!8$-1,2,4,5-tetrakis(4-carboxylatophenyl)-3,6-dibromobenzene)-(mu!2$-4,4'-ethene-1,2-diylbis(3-ethynylpyridine))-di-zinc N,N-dimethylformamide solvate)		yellow	P2/m	10	plate	8	100	0.894	0	The SQUEEZE/PLATON program has been used to model disordered solvent molecules.			TEMP: at 100 K COLOR: yellow "HABIT: plate
IYIJAC	Chang Yeon Lee, Youn-Sang Bae, Nak Cheon Jeong, O.K.Farha, A.A.Sarjeant, C.L.Stern, P.Nickias, R.Q.Snurr, J.T.Hupp, S.T.Nguyen	J.Am.Chem.Soc.	2011	(C48 H28 N2 O8 Zn2)n	catena-((mu!8$-1,2,4,5-tetrakis(4-carboxylatophenyl)benzene)-(mu!2$-4,4'-ethene-1,2-diyl(3-ethynylpyridine)(pyridine))-di-zinc unknown solvate)		yellow	P2/m	10	plate	8.19	100	0.522	0.521	The structures is disordered by symmetry. The SQUEEZE/PLATON program has been used to model some disorder.			TEMP: at 100 K COLOR: yellow "HABIT: plate
IYOGOT	B.J.Burnett, P.M.Barron, Chunhua Hu, Wonyoung Choe	J.Am.Chem.Soc.	2011	(C58 H34 N6 O9 Zn3)n	catena-[(mu!9$-5,10,15,20-tetrakis(4-Carboxylatophenyl)porphyrinato)-(mu!2$-4,4'-bipyridine-N,N')-aqua-tri-zinc(ii) unknown solvate]	PPF-27	purple	P4/nmm	129	plate	6.54	296	0.662	0.662	C11,C11,C12,C12 disordered by symmetry over four sites with occupancy 0.25; C15,C15,C16,C16 disordered by symmetry over four sites with occupancy 0.25. Disordered solvent molecules were not modelled and the disordered density was taken into account using the SQUEEZE/PLATON procedure. The unit cell was found to contain a void of 3668 A$3! holding 864 electrons.	at 296 K		TEMP: at 296 K COLOR: purple "HABIT: plate
IYOHOU	J.Heine, J.S.auf der Gunne, S.Dehnen	J.Am.Chem.Soc.	2011	(C36 H24 Cl6 N12 Zn3)n	catena-[bis(mu!2$-2,4,6-tris(4-Pyridyl)-1,3,5-triazine)-hexachloro-tri-zinc(ii) unknown solvate]		colorless	C2/c	15	plate	5.07	100	0.954	0.954	Disordered solvent molecules were not modelled and the disordered density was taken into account using the SQUEEZE/PLATON procedure. The unit cell was found to contain two voids of 3706 A$3! each holding 1008 electrons.			TEMP: at 100 K COLOR: colorless "HABIT: plate
IYOWID01	Qingxia Yao, Junliang Sun, Kuo Li, Jie Su, M.V.Peskov, Xiaodong Zou	Dalton Trans.	2012	(C138 H84 N6 O24 Zn6)n,n(C3 H7 N1 O1),n(H2 O1)	catena-(tetrakis(mu!6$-4,4',4''-Benzene-1,3,5-triyltris(benzoato))-tris(mu!2$-4,4'-bipyridine)-hexa-zinc dimethylformamide solvate hydrate)		colorless	Pm-3n	223	polyhedron	9.83	293	0.423	0	C8,C8,C9,C9 disordered by symmetry over two sites with occupancy 0.50. The SQUEEZE/PLATON program was used to model an unspecified number of disordered dimethylformamide and water molecules.	at 293 K		TEMP: at 293 K COLOR: colorless "HABIT: polyhedron
IYUCEL	R.den Hartog, M.R.Harvey, J.J.A.Hummel, S.T.van der Pol, I.Mutikainen, G.A.van Albada, E.Bouwman	Inorg.Chim.Acta	2011	(C90 H72 Cu2 N19)n,5.5n(C3 H7 N1 O1),5n(H2 O1)	catena-(tetrakis(mu!2$-1,4-bis(1H-Benzotriazol-1-ylmethyl)benzene)-dicyanamido-di-copper dimethylformamide solvate pentahydrate)		blue	P2/c	13	plate	15.52	173	0.997	0.997	The structure is disordered.			TEMP: at 173 K COLOR: blue "HABIT: plate
IYUHUG	Shou-Tian Zheng, J.J.Bu, Tao Wu, Chengtsung Chou, Pingyan Feng, Xianhui Bu	Angew.Chem.,Int.Ed.	2011	(C87 H55 In6 O34 1-)n,n(C1 H6 N1 1+)	catena-(methylammonium hexakis(mu!4$-biphenyl-4,4'-dicarboxylato)-bis(mu!3$-oxo)-(mu!2$-formato)-bis(formato)-diaqua-hexa-indium unknown solvate)	CPM-13	colorless	P43212	96	block	4.8	296	0.884	0.884	O15 and O15A disordered over two sites with occupancies 0.577:0.423. The solvent molecules were not modelled.	at 296 K		TEMP: at 296 K COLOR: colorless "HABIT: block
IYUQEZ	J.Basca, R.J.Less, H.E.Skelton, Z.Soracevic, A.Steiner, T.C.Wilson, P.T.Wood, D.S.Wright	Angew.Chem.,Int.Ed.	2011	(C100 H50 N40 Na7 O5)n,n(H12 Na1 O6)	catena-(Hexa-aqua-sodium octakis(mu!5$-1,2,3,4,5-pentacyancyclopentadienide)-pentakis(diethyl ether)-hepta-sodium)		colorless	Pm-3n	223	cube	10.81	100	0.951	0	A sodium atom, ether ligands and solvent and water ligands are disordered by symmetry. The SQUEEZE/PLATON program has been used to model some disordered solvent molecules.			TEMP: at 100 K COLOR: colorless "HABIT: cube
IYUWIJ	J.M.Falkowski, Cheng Wang, S.Liu, Wenbin Lin	Angew.Chem.,Int.Ed.	2011	(C40 H46 N4 O6 Ru1 2-)6n,2n(O1 2-),8n(Zn1 2+)	catena-(hexakis(mu!5$-3,3'-(cyclohexane-1,2-diylbis(nitrilomethylylidene))bis(5-t-butyl-4-hydroxybenzoato))-bis(mu!4$-oxo)-dodecapyridine-hexa-ruthenium-octa-zinc unknown solvate)		dark red	R32	155	block	16.32	293	0.929	0	Disordered solvent molecules were not modelled and the disordered density was taken into account using the SQUEEZE/PLATON procedure.	at 293 K	Large structure in which program limits have been exceeded. The structure is described as having 8 Zn atoms and 6 Ru atoms but the CIF suggests there are 10 Zn atoms for every 6 Ru atoms. Due to the complexity of the structure and this discrepancy the structure has been represented as ionic	TEMP: at 293 K COLOR: dark red "HABIT: block
IYUWUV	J.M.Falkowski, Cheng Wang, S.Liu, Wenbin Lin	Angew.Chem.,Int.Ed.	2011	(C40 H46 N4 O6 Ru1 2-)6n,2n(O1 2-),8n(Zn1 2+)	catena-(hexakis(mu!5$-3,3'-(cyclohexane-1,2-diylbis(nitrilomethylylidene))bis(5-t-butyl-4-hydroxybenzoato))-bis(mu!4$-oxo)-dodecapyridine-hexa-ruthenium-octa-zinc unknown solvate)		dark red	R3	146	cube	17.11	296	0.468	0	Disordered solvent molecules were not modelled and the disordered density was taken into account using the SQUEEZE/PLATON procedure.	at 296 K	Large structure in which program limits have been exceeded. The structure is described as having 8 Zn atoms and 6 Ru atoms but the CIF suggests there are 10 Zn atoms for every 6 Ru atoms. Due to the complexity of the structure and this discrepancy the structure has been represented as ionic	TEMP: at 296 K COLOR: dark red "HABIT: cube
IZEPAF	C.Mellot-Draznieks, J.Dutour, G.Ferey	Z.Anorg.Allg.Chem.	2004	(C24 H18 Cr3 F3 O16)n	catena-((mu!3$-Oxo)-tris(mu!4$-1,4-benzenedicarboxylato)-trifluoro-tri-chromium)			Pm-3m	221		0	295	0.666	0			The paper states that the fluorines are the terminal atoms of the trimers although the coordinates are not deposited
IZEPEJ	C.Mellot-Draznieks, J.Dutour, G.Ferey	Z.Anorg.Allg.Chem.	2004	(C96 H72 Cr12 F12 O64)n	catena-(dodecakis(mu!4$-1,4-benzenedicarboxylato)-tetrakis(mu!3$-oxo)-dodecaaqua-dodecafluoro-dodeca-chromium)			Fm-3m	225		0	295	0.477	0			The paper states that the fluorines are the terminal atoms of the trimers although the coordinates are not deposited
IZULUL	Ming-Hua Xie, Xiu-Li Yang, Chao Zou, Chuan-De Wu	Inorg.Chem.	2011	(C42 H34 N8 O8 Sn1 Zn2 4+)n,4n(N1 O3 1-),n(C3 H7 N1 O1),4n(H2 O1)	catena-((mu!4$-5,10,15,20-tetrakis(4-pyridyl)porphyrinato)-tetraaqua-bis(formato)-tin(iv)-di-zinc(ii) tetranitrate N,N-dimethylformamide solvate tetrahydrate)		dark purple	P4/mbm	127	block	8.99	293	0.964	0.964	The structure is disordered by symmetry. The SQUEEZE/PLATON program has been used to model the anions and solvent molecules.	at 293 K		TEMP: at 293 K COLOR: dark purple "HABIT: block
IZUSAY	D.J.Lun, G.I.N.Waterhouse, S.G.Telfer	J.Am.Chem.Soc.	2011	(C72 H72 N6 O22 Zn4)n	catena-(tris(mu!4$-2-((1-(t-butoxycarbonyl)pyrrolidin-2-yl)carbonylamino)biphenyl-4,4'-dicarboxylato)-(mu!4$-oxo)-tetra-zinc)		colorless	P-43m	215	block	11.79	292	0.537	0.537	The structure is disordered by symmetry.	at 292 K		TEMP: at 292 K COLOR: colorless "HABIT: block
IZUSEC	D.J.Lun, G.I.N.Waterhouse, S.G.Telfer	J.Am.Chem.Soc.	2011	(C57 H48 N6 O16 Zn4)n,5n(C3 H7 N1 O1)	catena-(tris(mu!4$-2-((pyrrolidin-2-yl)carbonylamino)biphenyl-4,4'-dicarboxylato)-(mu!4$-oxo)-tetra-zinc N,N-dimethylformamide solvate)		colorless	P-43m	215	block	12.86	292	0.559	0	The structure is disordered by symmetry. The SQUEEZE/PLATON program has been used to model the solvent molecules.	at 292 K		TEMP: at 292 K COLOR: colorless "HABIT: block
JEBLAE01	C.L.M.Pereira, A.C.Doriguetto, C.Konzen, L.C.Meira-Belo, U.A.Leitao, N.G.Fernandes, Y.P.Mascarenhas, J.Ellena, A.L.Brandl, M.Knobel, H.O.Stumpf	Eur.J.Inorg.Chem.	2005	(C16 H22 Co1 Cu1 N2 O9 S3)n	catena-((mu!3$-o-Phenylenebis(oxamato))-tris(dimethylsulfoxide)-cobalt(ii)-copper(ii))			Pnam	62		3.9	298	0.843	0	Two dimethylsulfoxide ligands are disordered.	at 298 K		TEMP: at 298 K POLYMORPH: alpha polymorph
JEDKEJ	Cai-Ming Liu, Song Gao, Hui-Zhong Kou, De-Qing Zhang, Hao-Ling Sun, Dao-Ben Zhu	Cryst.Growth Des.	2006	(C96 H78 Cr4 Cu6 N42)n,6n(H2 O1)	catena-(dodecakis(mu!2$-Cyano-C,N)-dodecacyano-hexakis(bis(2-pyridylmethyl)amine-N,N',N'')-tetra-chromium(iii)-hexa-copper(ii) hexahydrate)		dark blue	P21/c	14	block	8.89	293	0.842	0.838		at 293 K		TEMP: at 293 K COLOR: dark blue "HABIT: block
JEJWEB	Daofeng Sun, D.J.Collins, Yanxiong Ke, Jing-Lin Zuo, Hong-Cai Zhou	Chem.-Eur.J.	2006	(C204 H120 N12 O52 Zn16)n,4n(C3 H7 N1 O1),4n(H2 O1)	catena-[hexakis(mu!8$-N,N,N',N'-tetrakis(4-Carboxyphenyl)-1,4-phenylenediamine)-tetrakis(mu!4$-oxo)-hexadeca-zinc dimethylformamide solvate tetrahydrate]		red	I4132	214	block	3.74	213	0.587	0	Disordered solvent molecules were removed using SQUEEZE/PLATON.		cif gives the study temperature as 293 K	TEMP: at 213 K COLOR: red "HABIT: block
JEJWOL	Daofeng Sun, D.J.Collins, Yanxiong Ke, Jing-Lin Zuo, Hong-Cai Zhou	Chem.-Eur.J.	2006	(C114 H96 N6 Nd4 O30 S6)n,6n(C2 H6 O1 S1),10n(H2 O1)	catena-[tris(mu!6$-N,N,N',N'-tetrakis(4-Carboxyphenyl)-1,4-phenylenediamine)-hexakis(dimethylsulfoxide)-tetra-neodymium dimethylsulfoxide solvate decahydrate]		light yellow	P-1	2	block	8.19	213	0.958	0	Disordered solvent molecules were removed using SQUEEZE/PLATON.		cif gives the study temperature as 293 K	TEMP: at 213 K COLOR: light yellow "HABIT: block
JENKET	Daofeng Sun, Yanxiong Ke, T.M.Mattox, S.Parkin, Hong-Cai Zhou	Inorg.Chem.	2006	(C100 H70 N2 O16 Zn4)n,3n(C3 H7 N1 O1),n(C5 H5 N1),3n(H2 O1)	catena-(bis(mu!5$-1,3,5-tris(4'-Carboxylato-1,1'-biphenyl-4-yl)benzene)-bis(mu!3$-hydroxo)-diaqua-bis(pyridine)-tetra-zinc N,N-dimethylformamide pyridine solvate trihydrate)		colorless	Pna21	33	rod	7.11	213	0.858	0	The disordered solvent molecules were not modelled and the disordered density was taken into account using the SQUEEZE/PLATON procedure.			TEMP: at 213 K COLOR: colorless "HABIT: rod
JODGIU	S.K.Elsaidi, M.H.Mohamed, L.Wojtas, A.Chanthapally, Tony Pham, B.Space, J.J.Vittal, M.J.Zaworotko	J.Am.Chem.Soc.	2014	(C24 H16 Co1 N2 O4)n	catena-[bis(mu!2$-4-(pyridin-4-yl)benzoato)-cobalt unknown solvate]		red	P4212	90	rod	6.4	228	0.926	0.926	Disordered solvent molecules were not modelled and the disordered density was taken into account using the SQUEEZE/PLATON procedure.			TEMP: at 228 K COLOR: red "HABIT: rod
JODGOA	S.K.Elsaidi, M.H.Mohamed, L.Wojtas, A.Chanthapally, Tony Pham, B.Space, J.J.Vittal, M.J.Zaworotko	J.Am.Chem.Soc.	2014	(C56 H40 Co2 N4 O8)n	catena-[tetrakis(mu!2$-4-(2-(pyridin-4-yl)vinyl)benzoato)-di-cobalt unknown solvate]		red	F222	22	block	7.06	100	0.689	0.689	C21B,C34A,C35B,C38A and C21A,C34B,C35A,C38B disordered over two sites with occupancies 0.50:0.50; Disordered solvent molecules were not modelled and the disordered density was taken into account using the SQUEEZE/PLATON procedure.			TEMP: at 100 K COLOR: red "HABIT: block
JOGBAK	Xiaoxia Lv, Liangjun Li, Sifu Tang, Chao Wang, Xuebo Zhao	Chem.Commun.	2014	(C23 H18 N2 O5 Zn1)n	catena-[(mu!3$-4,4'-(5,6-Dimethyl-1H-benzimidazole-4,7-diyl)dibenzoato)-aqua-zinc(ii) unknown solvate]			P212121	19		7.94	296	0.967	0.967	C14,C15 and C14',C15' disordered over two sites with occupancies 0.619:0.381. Disordered solvent molecules were not modelled and the disordered density was taken into account using the SQUEEZE/PLATON procedure.	at 296 K		TEMP: at 296 K
JOKFIA	Nakeun Ko, Kyungkyou Noh, Siyoung Sung, Hye Jeong Park, Sang Youn Park, Jaheon Kim	Chem.Commun.	2014	(C252 H171 N18 O48 Zn12)n	catena-[octakis(mu-benzene-1,3,5-tribenzoato)-tris(mu-2-methylimidazolato)-hexakis(2-methyl-1H-imidazole)-dodeca-zinc unknown solvate]		light yellow	Im-3	204	block	5.36	147	0.868	0.868	The structure is disordered; Disordered solvent molecules were not modelled and the disordered density was taken into account using the SQUEEZE/PLATON procedure.			TEMP: at 147 K OTHER-EXP: gas adsorption
JORQAK	H.B.Aiyappa, S.Saha, B.Garai, J.Thote, S.Kurungot, R.Banerjee	Cryst.Growth Des.	2014	(C22 H6 Fe4 O17 Pd1)n	catena-(bis(mu!6$-Benzene-1,3,5-tricarboxylato)-tetrakis(mu!2$-carbonyl-C,O)-(mu!2$-oxo)-tetra-iron-palladium)			P63/mmc	194		13.44	293	0.965	0.963		at 293 K		TEMP: at 293 K
JORVET	Tingting Cao, Yanqiang Peng, Ting Liu, Suna Wang, Jianmin Dou, Yunwu Li, Changhui Zhou, Dacheng Li, Junfeng Bai	CrystEngComm	2014	(C123 H92 N20 O32 Zn6)n	catena-[bis(mu-3-amino-5-ammonio-1,2,4-triazolato)-bis(mu-3,5-diamino-1,2,4-triazolato)-pentakis(mu-4,4'-methanediylbis(3-hydroxynaphthalene-2-carboxylato))-diaqua-hexa-zinc(ii) unknown solvate]		yellow	C2/c	15	block	7.92	104	0.851	0.851	The SQUEEZE/PLATON program has been used to model some disorder.			TEMP: at 104.3 K COLOR: yellow "HABIT: block
JOZWIG	Qipu Lin, Xianhui Bu, Aiguo Kong, Chengyu Mao, Xiang Zhao, Fei Bu, Pingyun Feng	J.Am.Chem.Soc.	2015	(C216 H130 N12 O32 Zr6)n	catena-[tris(mu!8$-porphyrin-5,10,15,20-tetrayltetrakis(biphenyl-4-carboxylato))-tetrakis(mu!3$-hydroxo)-tetrakis(mu!3$-oxido)-hexa-zirconium unknown solvate]		black	Pm-3m	221	cubic	8.17	296	0.4	0.465	The structure is disordered by symmetry. Disordered solvent molecules were not modelled and the disordered density was taken into account using the SQUEEZE/PLATON procedure.	at 296 K	We calculate 76.97% void space in the structure	TEMP: at 296 K COLOR: black "HABIT: cubic
JOZWIG01	Jun Zheng, Mingyan Wu, Feilong Jiang, Weiping Su, Maochun Hong	Chemical Science	2015	(C216 H130 N12 O32 Zr6)n	catena-[tris(mu!8$-porphyrin-5,10,15,20-tetrayltetrakis(biphenyl-4-carboxylato))-tetrakis(mu!3$-hydroxo)-tetrakis(mu!3$-oxido)-hexa-zirconium unknown solvate]	FJI-H6		Pm-3m	221	cubic	5.63	293	0.399	0.399	The structure is disordered. The SQUEEZE/PLATON program has been used to model some disorder.	293 K		TEMP: 293 K HABIT: cubic
JOZWIG02	T.C.Wang, W.Bury, D.A.Gomez-Gualdron, N.A.Vermeulen, J.E.Mondloch, P.Deria, Kainan Zhang, P.Z.Moghadam, A.A.Sarjeant, R.Q.Snurr, J.Fraser Stoddart, J.T.Hupp, O.K.Farha	J.Am.Chem.Soc.	2015	(C216 H130 N12 O32 Zr6)n	catena-[tris(mu!8$-5,10,15,20-tetrakis(4'-Carboxylatobiphenyl-4-yl)porphyrin)-tetrakis(mu!3$-hydroxo)-tetrakis(mu!3$-oxo)-hexa-zirconium unknown solvate]	NU-1102	red	Pm-3m	221	block	3.8	250	0.404	0.403	The structure is disordered. The MASK/OLEX2 program has been used to model some disorder.			TEMP: 250 K COLOR: red "HABIT: block
JOZWOM	Qipu Lin, Xianhui Bu, Aiguo Kong, Chengyu Mao, Xiang Zhao, Fei Bu, Pingyun Feng	J.Am.Chem.Soc.	2015	(C216 H136 N12 O38 Zn3 Zr6)n	catena-[tris(mu!9$-5,10,15,20-tetrakis(4'-carboxylatobiphenyl-4-yl)porphyrin-21,23-diyl)-tetrakis(mu!3$-hydroxo)-tetrakis(mu!3$-oxido)-hexakis(aqua)-hexa-zirconium-tri-zinc unknown solvate]		black	Pm-3m	221	cubic	10.12	296	0.43	0.492	The structure is disordered by symmetry. Disordered solvent molecules were not modelled and the disordered density was taken into account using the SQUEEZE/PLATON procedure.	at 296 K	We calculate 76.05% void space in the structure	TEMP: at 296 K COLOR: black "HABIT: cubic
JOZWUS	Qipu Lin, Xianhui Bu, Aiguo Kong, Chengyu Mao, Xiang Zhao, Fei Bu, Pingyun Feng	J.Am.Chem.Soc.	2015	(C216 H136 Co3 N12 O38 Zr6)n	catena-[tris(mu!9$-5,10,15,20-tetrakis(4'-carboxylatobiphenyl-4-yl)porphyrin-21,23-diyl)-tetrakis(mu!3$-hydroxo)-tetrakis(mu!3$-oxido)-hexakis(aqua)-hexa-zirconium-tri-cobalt unknown solvate]		black	Pm-3m	221	cubic	7.68	296	0.43	0.492	The structure is disordered by symmetry. Disordered solvent molecules were not modelled and the disordered density was taken into account using the SQUEEZE/PLATON procedure.	at 296 K	We calculate 76.17% void space in the structure	TEMP: at 296 K COLOR: black "HABIT: cubic
JOZXAZ	Qipu Lin, Xianhui Bu, Aiguo Kong, Chengyu Mao, Xiang Zhao, Fei Bu, Pingyun Feng	J.Am.Chem.Soc.	2015	(C216 H124 Cl3 Fe3 N12 O32 Zr6)n	catena-[tris(mu!9$-5,10,15,20-tetrakis(4'-carboxylatobiphenyl-4-yl)porphyrin-21,23-diyl)-tetrakis(mu!3$-hydroxo)-tetrakis(mu!3$-oxido)-trichloro-hexa-zirconium-tri-iron unknown solvate]		black	Pm-3m	221	cubic	8.7	296	0.426	0.489	The structure is disordered by symmetry. Disordered solvent molecules were not modelled and the disordered density was taken into account using the SQUEEZE/PLATON procedure.	at 296 K	We calculate 75.98% void space in the structure	TEMP: at 296 K COLOR: black "HABIT: cubic
JUCFAQ	En-Long Zhou, Peng Huang, Chao Qin, Kui-Zhan Shao, Zhong-Min Su	J.Mater.Chem.A	2015	(C48 H18 Na1 O24 Zn4)n	catena-[tris(mu-biphenyl-3,3',5,5'-tetracarboxylato)-sodium-tetra-zinc unknown solvate]		colorless	C2/c	15	block	5.2	298	0.973	0.973	O2A and O2B disordered over two sites with occupancies 0.60:0.40; O9A and O9B disordered over two sites with occupancies 0.50:0.50; The SQUEEZE/PLATON program has been used to model some disorder.	at 298 K		TEMP: at 298 K COLOR: colorless "HABIT: block
JUPLUD	M.Zhao, J.Su, J.Zhang, J.-Y.Wu, Y.-P.Tian	Acta Crystallogr.,Sect.C:Cryst.Struct.Chem.	2015	(C126 H100 N14 O28 Zn6)n	catena-[tetrakis(mu!4$-4,4',4''-nitrilotribenzoato)-tris(mu!2$-4,4'-bipyridine)-tetrakis(N,N-dimethylformamide)-hexa-zinc unknown solvate]		light yellow	P-1	2	rodlike	7.09	296	0.874	0.874	C10,C61,C62,C63,C64,C65,C66,C7,C8,C9,N6,N7,O1,O14 and C10',C61',C62',C63',C64',C65',C66',C7',C8',C9',N6',N7',O1',O14' disordered over two sites with occupancies 0.575:0.425; The SQUEEZE/PLATON program has been used to model some disorder.	296 K		TEMP: 296 K COLOR: light yellow "HABIT: rodlike
JUSGOV	M.Kaposi, M.Cokoja, C.H.Hutterer, S.A.Hauser, T.Kaposi, F.Klappenberger, A.Pothig, J.V.Barth, W.A.Herrmann, F.E.Kuhn	Dalton Trans.	2015	(C42 H27 N3 O16 Zr3)n	catena-(tris(mu!4$-2-Aminobiphenyl-4,4'-dicarboxylato)-tetrakis(mu!3$-oxo)-tri-zirconium)	UiO-67-NH2	yellow	Fm-3m	225	prism	4.81	123	0.762	0.76	The structure is disordered by symmetry. The SQUEEZE/PLATON program may have been used.			TEMP: 123 K COLOR: yellow "HABIT: prism
JUZBOX	Dashu Chen, Hongzhu Xing, Zhongmin Su, Chungang Wang	Chem.Commun.	2016	(C74 H54 N2 Na2 O10 Zn1)n,x(C5 H11 N1 O1)	catena-[bis(mu-4,4'-[anthracene-9,10-diyldi(ethyne-2,1-diyl)]dibenzoato)-bis(N,N-diethylformamide)-di-sodium-zinc N,N-diethylformamide solvate]	NNU-27	red	P42/nbc	133	needle-like	5.81	296	0.879	0.813	The structure is disordered. Disordered solvent molecules were not modelled and the disordered density was taken into account using the SQUEEZE/PLATON procedure.	296 K		TEMP: 296 K COLOR: red "HABIT: needle-like
KACYEU	D.Zhao, Daqiang Yuan, R.Krishna, J.van Baten, Hong-Cai Zhou	Chem.Commun.	2010	(C76 H104 Cu4 O20 Si4)n	catena-(tetrakis(mu!4$-5-(2-(Tri-isopropylsilyl)ethynyl)benzene-1,3-dicarboxylato)-tetra-aqua-tetra-copper unknown solvate)		green	R-3m	166	prism	44.92	173	0.663	0.663	The solvent molecules were taken into account using PLATON/SQUEEZE.	synchrotron radiation		TEMP: at 173 K RADIATION: synchrotron radiation
KACZEV	Xiaojun Gu, Zhang-Hui Lu, Qiang Xu	Chem.Commun.	2010	(C120 H75 In9 N18 O42)n,14n(H2 O1)	catena-(hexakis(mu!4$-Azobenzene-4,4'-dicarboxylato)-hexakis(mu!3$-isonicotinato)-tris(mu!3$-oxo)-trihydroxy-nona-indium tetradecahydrate)		orange	I-43d	220	block	6	293	0.849	0.849	The SQUEEZE/PLATON program has been used to model some disorder.	at 293 K		TEMP: at 293 K COLOR: orange "HABIT: block
KACZIZ	Xiaojun Gu, Zhang-Hui Lu, Qiang Xu	Chem.Commun.	2010	(C120 H81 In9 N24 O42)n,8n(H2 O1)	catena-(hexakis(mu!4$-Azobenzene-4,4'-dicarboxylato)-hexakis(mu!3$-3-aminoisonicotinato)-tris(mu!3$-oxo)-trihydroxy-nona-indium octahydrate)		orange	I-43d	220	block	3.53	293	0.849	0.862	The SQUEEZE/PLATON program has been used to model some disorder.	at 293 K		TEMP: at 293 K COLOR: orange "HABIT: block
KAFTOD	S.J.Lee, C.Doussot, A.Baux, Lujia Liu, G.B.Jameson, C.Richardson, J.J.Pak, F.Trousselet, F.-X.Coudert, S.G.Telfer	Chem.Mater.	2016	(C120 H90 N12 O28 Zn6)n	catena-(tetrakis(mu!4$-tris(4-Carboxylatophenyl)amine)-tris(mu!2$-4,4'-bipyridine)-diaqua-bis(dimethylformamide)-hexa-zinc unknown solvate)	MUF-21	yellow	P-1	2	rod	7.79	293	0.836	0.835	The SQUEEZE/PLATON program has been used to model some disorder.	293 K		TEMP: 293 K COLOR: yellow "HABIT: rod
KAFTUJ	S.J.Lee, C.Doussot, A.Baux, Lujia Liu, G.B.Jameson, C.Richardson, J.J.Pak, F.Trousselet, F.-X.Coudert, S.G.Telfer	Chem.Mater.	2016	(C48 H36 N4 O12 Zn3)n	catena-(bis(mu!6$-tris(4-Carboxylatophenyl)amine)-(mu!2$-1,4-diazabicyclo(2.2.2)octane)-tri-zinc unknown solvate)	MUF-22	yellow	R-3c	167	rod	9.83	293	0.682	0.682	The SQUEEZE/PLATON program has been used to model some disorder.	293 K		TEMP: 293 K COLOR: yellow "HABIT: rod
KAFVAR	S.J.Lee, C.Doussot, A.Baux, Lujia Liu, G.B.Jameson, C.Richardson, J.J.Pak, F.Trousselet, F.-X.Coudert, S.G.Telfer	Chem.Mater.	2016	(C216 H156 N20 O48 Zn12)n	catena-(octakis(mu!6$-tris(4-Carboxylatophenyl)amine)-tris(mu!2$-4,4'-bipyridine)-tris(mu!2$-1,4-diazabicyclo(2.2.2)octane)-dodeca-zinc)	MUF-32	colorless	R-3	148	prism	10.83	173	0.605	0.605	The 1,4-diazabicyclo(2.2.2)octane ligands are disordered by symmetry.	twin		TEMP: 173 K OTHER-DIFF: twin
KAKCAD	K.S.Asha, M.Makkitaya, Anshu Sirohi, L.Yadav, G.Sheet, S.Mandal	CrystEngComm	2016	(C108 H72 O30 Sr5 2-)n,2(C2 H8 N1 1+)	catena-[bis(diemthylammonium) tetrakis(mu-1,3,5-benzenetribenzoato)-hexa-aqua-penta-strontium]		colorless	C2/c	15	platelike	8.09	298	0.938	0.931		298 K	We calculate 45.77% void space in the structure	TEMP: 298 K COLOR: colorless "HABIT: platelike
KALFIO	Dong Liu, Jian-Ping Lang, B.F.Abrahams	J.Am.Chem.Soc.	2011	(C40 H30 N4 Ni2 O9)n	catena-((mu!4$-1,2,3,4-tetrakis(pyridin-4-yl)cyclobutane)-bis(mu!3$-isophthalato)-(mu!2$-aqua)-di-nickel)		green	Fdd2	43	block	5.98	223	0.949	0.949				TEMP: at 223 K COLOR: green "HABIT: block
KAMZUV	D.Fairen-Jimenez, S.A.Moggach, M.T.Wharmby, P.A.Wright, S.Parsons, T.Duren	J.Am.Chem.Soc.	2011	(C8 H10 N4 Zn1)n,0.5n(N2)	catena-(bis(mu!2$-2-Methylimidazolato)-zinc dinitrogen)	ZIF-8 dinitrogen		I-43m	217		0	77	0.962	0	Some of the nitrogen molecules are disordered.		The R-factor was not reported. The number of nitrogen molecules is not made clear	TEMP: at 77 K
KEBRAM	K.Hirai, S.Furukawa, M.Kondo, M.Meilikhov, Y.Sakata, O.Sakata, S.Kitagawa	Chem.Commun.	2012	(C22 H22 N4 O8 Zn2)n	catena-(bis(mu!4$-2-aminobenzene-1,4-dicarboxylato)-(mu!2$-1,4-diazabicyclo[2.2.2]octane)-di-zinc(ii))		brown	P4/mmm	123	prism	8.15	223	0.854	0.854	The structure is disordered by symmetry.		We calculate 28% void space in the structure	TEMP: at 223 K COLOR: brown "HABIT: prism
KEQCAM	S.Sen, N.N.Nair, T.Yamada, H.Kitagawa, P.K.Bharadwaj	J.Am.Chem.Soc.	2012	(C111 H93 N15 O28 Zn5 1+)n,n(N1 O3 1-),n(H2 O1)	catena-(hexakis(mu!2$-1,3-bis(4-carboxyphenyl)imidazolium)-(mu!2$-oxo)-tris(diemthylformamide)-penta-zinc nitrate monohydrate)		colorless	R-3	148	flake	8.46	100	0.896	0				TEMP: at 100 K COLOR: colorless "HABIT: flake
KEQDER	N.Shustova, A.F.Cozzolino, M.Dinca	J.Am.Chem.Soc.	2012	(C66 H36 O20 Zn4)n	catena-((mu!16$-tetrakis[4-(3,5-dicarboxyphenylethynyl)-phenyl]ethylene)-tetra-aqua-tetra-zinc)		yellow	I4/mmm	139	block	5.42	100	0.573	0.569				TEMP: at 100 K COLOR: yellow "HABIT: block
KEQDOB	Guo-Qiang Kong, Sha Ou, Chao Zou, Chuan-De Wu	J.Am.Chem.Soc.	2012	(C23 H20 Cl2 N4 O4 Zn1)n	catena-((mu!2$-4,4'-[methanediylbis(1H-imidazolylidene-3,1(2H)-diyl)]bis(3-methylbenzoato))-dichloro-zinc)		colorless	P6222	180	block	7.54	293	0.915	0.913		at 293 K		TEMP: at 293 K COLOR: colorless "HABIT: block
KEVCEV	Yong-Sheng Wei, Kai-Jie Chen, Pei-Qin Liao, Bao-Yong Zhu, Rui-Biao Lin, Hao-Long Zhou, Bao-Ying Wang, Wei Xue, Jie-Peng Zhang, Xiao-Ming Chen	Chemical Science	2013	(C72 H43 N6 Ni3 O13)n	catena-(tris(mu!5$-4,4'-(4,4'-Bipyridine-2,6-diyl)dibenzoato)-(mu!3$-hydroxo)-di-nickel(ii)-nickel(iii) unknown solvate)		green	R-3c	167	plate	6.91	150	0.884	0.884	H1A disordered by symmetry over two sites with occupancy 0.50; The SQUEEZE/PLATON program has been used to model the solvent molecules.			TEMP: at 150 K COLOR: green "HABIT: plate
KEWJIG	J.M.Taylor, A.H.Mahmoudkhani, G.K.H.Shimizu	Angew.Chem.,Int.Ed.	2007	(C34 H38 Cu3 O16 P4)n,n(C1 H4 O1),n(H2 O1)	catena-((mu!9$-1,3,5-tris(4-hydrogen phosphonatophenyl)-7-(4-phosphatophenyl)adamantane)-(mu!3$-hydroxo)-triaqua-tri-copper methanol clathrate monohydrate)		blue	R-3	148	Octahedron	14.8	173	0.994	0	All the phenyl groups are rotationally disordered. No coordinates are given for the disordered water and methanol guest molecules.			TEMP: at 173 K COLOR: blue "HABIT: Octahedron
KEWZOD	Bing Zheng, Jiahuan Luo, Fang Wang, Yu Peng, Guanghua Li, Qisheng Huo, Yunling Liu	Cryst.Growth Des.	2013	(C38 H22 N4 O8 Zn2)n	catena-((mu!6$-5,5'-Ethyne-1,2-diyldi-isophthalato)-bis(mu!2$-4,4'-bipyridine)-di-zinc)		colorless	Pbam	55	block	10.63	296	0.842	0.842		296 K		TEMP: 296 K COLOR: colorless "HABIT: block
KEYROX	Ai-Xin Zhu, Rui-Biao Lin, Xiao-Lin Qi, Yan Liu, Yan-Yong Lin, Jie-Peng Zhang, Xiao-Ming Chen	Microporous and Mesoporous Materials	2012	(C6 H8 N6 Zn1)n	catena-(bis(mu!2$-3-Methyl-1,2,4-triazolato)-zinc)	MAF-7	colorless	I-43m	217	block	2.89	393	0.932	0.932	N2 and C1 disordered over two sites with occupancies 0.50:0.50.			TEMP: at 393 K COLOR: colorless "HABIT: block
KIJNIC	Feng Jin, Ying Zhang, Hui-Zhen Wang, Hui-Zhi Zhu, Yan Yan, Jun Zhang, Jie-Ying Wu, Yu-Peng Tian, Hong-Ping Zhou	Cryst.Growth Des.	2013	(C18 H17 Ag1 N4 O3)n,0.5n(C6 H6)	catena-[(mu!2$- (5,5-Dimethyl-3-(2-(pyridin-2-yl)vinyl)cyclohex-2-en-1-ylidene)malononitrile)-(mu!2$-nitrato)-silver benzene solvate]		yellow	P21/c	14	plate	3.18	298	0.759	1.518		at 298 K		TEMP: at 298 K COLOR: yellow "HABIT: plate
KIJRUS	Jianfeng Cai, Jiancan Yu, Hui Xu, Yabing He, Xing Duan, Yuanjing Cui, Chuande Wu, Banglin Chen, Guodong Qian	Cryst.Growth Des.	2013	(C40 H26 Cu2 O10)n	catena-[(mu!8$-biphenyl-3,3',5,5'-tetra-(phenyl-4-carboxylato))-diaqua-di-copper unknown solvate]	ZJU-30	green	I-4m2	119	block	4.89	293	0.731	0.731	Disordered solvent molecules were not modelled and the disordered density was taken into account using the SQUEEZE/PLATON procedure.	293 K		TEMP: 293 K COLOR: green "HABIT: block
KINSAD	H.G.T.Nguyen, M.H.Weston, A.A.Sarjeant, D.M.Gardner, Zhi An, R.Carmieli, M.R.Wasielewski, O.K.Farha, J.T.Hupp, S.T.Nguyen	Cryst.Growth Des.	2013	(C56 H32 Br2 N2 O10 Zn2)n	catena-[(mu!8$-4,4',4'',4'''-(3,6-dibromobenzene-1,2,4,5-tetrayl)tetrabenzoato)-(mu!2$-4,4'-((2,5-dimethoxy-1,4-phenylene)diethyne-2,1-diyl)dipyridine)-di-zinc(ii)]		colorless	Pmmm	47	block	9.58	225	0.464	0.464	C15,O2 disordered over four configurations with occupancies 0.50,0.50.			TEMP: at 225.0 K COLOR: colorless "HABIT: block
KINSEH	H.G.T.Nguyen, M.H.Weston, A.A.Sarjeant, D.M.Gardner, Zhi An, R.Carmieli, M.R.Wasielewski, O.K.Farha, J.T.Hupp, S.T.Nguyen	Cryst.Growth Des.	2013	(C64 H44 Br2 N2 O14 Zn2)n	catena-[(mu!8$-4,4',4'',4'''-(3,6-dibromobenzene-1,2,4,5-tetrayl)tetrabenzoato)-(mu!2$-3,6-bis(pyridin-4-ylethynyl)benzene-1,2-diyl di-tert-butyl biscarbonate)-di-zinc(ii)]		yellow	Pmmm	47	block	12.08	100	0.549	0	The structure is disordered.			TEMP: at 100 K COLOR: yellow "HABIT: block
KIRFOI	Zhiyong Lu, Liting Du, Kuanzhen Tang, Junfeng Bai	Cryst.Growth Des.	2013	(C63 H39 Cu6 N3 O30)n	catena-(tris(mu!8$-3,5-bis(3,5-Dicarboxylatophenyl)pyridine)-hexa-aqua-hexa-copper unknown solvate)	NJU-Bai10	green	Cmcm	63	block	4.85	291	0.713	0.713	O3WA,O3WB disordered over four configurations with occupancies 0.50,0.50. The SQUEEZE/PLATON program was used to model the unidentified disordered solvent molecules.	at 291 K		TEMP: at 291 K COLOR: green "HABIT: block
KISXIU	Kyoungmoo Koh, A.G.Wong-Foy, A.J.Matzger	Angew.Chem.,Int.Ed.	2008	(C132 H72 O39 Zn12)n	catena-(tetrakis(mu!6$-1,3,5-tris(4-Carboxyphenyl)benzene)-tris(mu!4$-terephthalato)-tris(mu!4$-oxo)-dodeca-zinc unknown solvate)	UMCM-1	colorless	P63/m	176	needle	7.87	295	0.39	0.39	Several phenyl rings are disordered over two sites. Disordered solvent molecules have been removed using SQUEEZE/PLATON.
KITVAM	B.Gole, A.K.Bar, P.S.Mukherjee	Chem.-Eur.J.	2014	(C124 H88 N8 O20 Zn4)n	catena-(tetrakis(mu-5-(benzyloxy)isophthalato)-tetrakis(mu-1,4-bis(pyridin-4-yl)benzene)-tetra-zinc unknown solvate)		colorless	P1	1	Needles	12.51	85	0.95	0.95	Disordered solvent molecules were not modelled and the disordered density was taken into account using the SQUEEZE/PLATON procedure.			TEMP: at 85 K COLOR: colorless "HABIT: Needles
KIYTOD	Xiu-Li Yang, Chao Zou, Yabing He, Min Zhao, Banglin Chen, Shengchang Xiang, M.O'Keeffe, Chuan-De Wu	Chem.-Eur.J.	2014	(C52 H28 Cu4 N4 Ni1 O20)n	catena-[(mu!17$-5,10,15,20-tetrakis(3,5-Dicarboxylatophenyl)porphyrinato)-tetra-aqua-tetra-copper(ii)-nickel(ii) unknown solvate]	ZJU-21	brown	P4/mbm	127	block	9.56	293	0.808	0.808	The structure is disordered by symmetry. Disordered solvent molecules were not modelled and the disordered density was taken into account using the SQUEEZE/PLATON procedure. The unit cell was found to contain a void of 14157 A$3! holding 3552 electrons.	293 K		TEMP: 293 K COLOR: brown "HABIT: block
KIYXUN	Xiu-Li Yang, Chao Zou, Yabing He, Min Zhao, Banglin Chen, Shengchang Xiang, M.O'Keeffe, Chuan-De Wu	Chem.-Eur.J.	2014	(C52 H36 Cu6 Mn1 N4 O26)n	catena-[(mu-5,10,15,20-tetrakis(3,5-Dicarboxylatophenyl)porphyrinato)-bis(mu-oxo)-octa-aqua-hexa-copper-manganese unknown solvate]	ZJU-22	brown	P63/mcm	193	block	7.06	293	0.978	0	One of the three independent copper positions is modelled with occupancy 0.33. Disordered solvent molecules were not modelled and the disordered density was taken into account using the SQUEEZE/PLATON procedure. The unit cell was found to contain a total void space of 8570 A$3! holding 1143 electrons.	293 K		TEMP: 293 K COLOR: brown "HABIT: block
KOGSIK	N.Sikdar, A.Hazra, T.K.Maji	Inorg.Chem.	2014	(C38 H24 N4 O8 Zn2)n,2n(C3 H7 N1 O1),2n(H2 O1)	catena-[bis(mu!4$-Biphenyl-4,4'-dicarboxylato)-(mu!2$-4,4'-diazene-1,2-diyldipyridine)-di-zinc N,N-dimethylformamide solvate dihydrate]		red	P-1	2	block	6.45	240	0.895	0	C36B,C37B,C38B,C40B and C36A,C37A,C38A,C40A disordered over two sites with occupancies 0.50:0.50. The solvent molecules are severely disordered and could not be located from the diffraction data.			TEMP: at 240 K COLOR: red "HABIT: block
KOHDIW	Yun-Shan Xue, Yan Xu, Hong-Bin Du	Wuji Huaxue Xuebao(Chin.)(Chin.J.Inorg.Chem.)	2015	(C28 H16 Co1 O8 Si1 2-)n,2n(C2 H8 N1 1+),1.25n(H2 O1)	catena-[bis(dimethylammonium) (mu-tetrakis(4-carboxylatophenyl)silane)-cobalt hydrate]		purple	Pbca	61	rod	9.79	296	0.97	0.971	O1W and O2W and O4W and O3W disordered over four sites with occupancies 0.50:0.25:0.25:0.25.	296 K	We calculate 25.94% void space in the structure	TEMP: 296 K COLOR: purple "HABIT: rod
KOJZEP	H.Furukawa, Jaheon Kim, N.W.Ockwig, M.O'Keeffe, O.M.Yaghi	J.Am.Chem.Soc.	2008	(C19 H13 Cu1 N3 O5)n,n(C3 H7 N1 O1),0.5n(C5 H9 N1 O1),n(H2 O1)	catena-((mu!4$-2,2'-Dicyanobiphenyl-4,4'-dicarboxylato)-(N,N-dimethylformamide)-copper N,N-dimethylformamide 1-methylpyrrolidin-2-one solvate monohydrate)	MOF-601	blue	R-3m	166	block	5.47	223	0.825	0.825	The cyano group is disordered over two sites with occupancies 0.561:0.439. The coordinated dimethylformamide molecule is disordered by symmetry. The disordered dimethylformamide and methylpyrrolidinone solvent molecules and the water molecules were not modelled and the disordered density was taken into account using the SQUEEZE/PLATON procedure.			TEMP: at 223 K COLOR: blue "HABIT: block
KOJZIT	H.Furukawa, Jaheon Kim, N.W.Ockwig, M.O'Keeffe, O.M.Yaghi	J.Am.Chem.Soc.	2008	(C20 H21 Cu1 N1 O5)n,n(C4 H9 N1 O1),0.5n(C3 H7 N1 O1),0.5n(C5 H5 N1),1.5n(H2 O1)	catena-((mu!4$-2,2'-Dimethylbiphenyl-4,4'-dicarboxylato)-(N,N-dimethylacetamide)-copper N,N-dimethylacetamide N,N-dimethylformamide pyridine solvate sesquihydrate)	MOF-602	blue	R-3m	166	block	5.32	258	0.935	0.925	The methyl group is disordered over two sites with occupancies 0.634:0.366. The coordinated dimethylacetamide molecule is disordered by symmetry. The disordered dimethylacetamide, dimethylformamide and pyridine solvent molecules and the water molecules were not modelled and the disordered density was taken into account using the SQUEEZE/PLATON procedure.			TEMP: at 258 K COLOR: blue "HABIT: block
KOMCOG	Shuai Yuan, Yong-Kai Deng, Dr Di Sun	Chem.-Eur.J.	2014	(C27 H21 Cl1 N7 Zn1 1+)n,n(N1 O3 1-),2n(C3 H7 N1 O1)	catena-((mu!3$-tris(4-(Imidazol-1-yl)phenyl)amine)-chloro-zinc nitrate dimethylformamide solvate)		colorless	Pnna	52	block	6.63	173	0.683	1.044	O1,O2,O3 disordered by symmetry over two configurations with occupancy 0.50. The SQUEEZE/PLATON program was used to model the disordered solvent.			TEMP: at 173 K COLOR: colorless "HABIT: block
KOPHII	Ananya Dutta, A.G.Wong-Foy, A.J.Matzger	Chemical Science	2014	(C98 H68 N2 O26 Zn8)n	catena-[bis(mu!6$-4,4',4''-nitrilotribenzoato)-bis(mu!4$-2',3',5',6'-tetramethyl-1,1':4',1''-terphenyl-4,4''-dicarboxylato)-(mu!4$-terephthalato)-bis(mu!4$-oxo)-octa-zinc unknown solvate]		colorless	Pnma	62	prism	6.51	95	0.423	0.423	Disordered solvent molecules were not modelled and the disordered density was taken into account using the SQUEEZE/PLATON procedure.			TEMP: at 95 K COLOR: colorless "HABIT: prism
KOPHOO	Ananya Dutta, A.G.Wong-Foy, A.J.Matzger	Chemical Science	2014	(C86 H60 N2 O26 Zn8)n	catena-[bis(mu!6$-4,4',4''-nitrilotribenzoato)-bis(mu!4$-2,2',6,6'-tetramethylbiphenyl-4,4'-dicarboxylato)-(mu!4$-terephthalato)-bis(mu!4$-oxo)-octa-zinc]		colorless	P21/c	14	chunk	10.97	233	0.493	0.493			We calculate 77.38% void space in the structure	TEMP: at 233 K COLOR: colorless "HABIT: chunk
KOQGAA	T.Kitao, Y.Tokunaga, D.Umeyama, Cho Rong Kim, T.Uemura, S.Kitagawa	Inorg.Chim.Acta	2015	(C50 H36 N2 O12 Zn2)n,4(C3 H7 N1 O1)	catena-[bis(mu!4$-(R)-2,2'-dihydroxy-1,1'-binaphthalene-5,5'-dicarboxylato)-(mu!2$-1,4-diazabicyclo[2.2.2]octane)-di-zinc N,N-dimethylformamide unknown solvate]			P4212	90		8.62	283	0.958	0.958	C20,C33 and C1,C46 disordered over two sites with occupancies 0.38:0.38; The SQUEEZE/PLATON program has been used to model some disorder.	at 283 K		TEMP: at 283 K
KOZQEX	U.Stoeck, I.Senkovska, V.Bon, S.Krause, S.Kaskel	Chem.Commun.	2015	(C42 H26 Cu3 N2 O15)n	catena-[bis(mu!6$-9-(4-carboxylatophenyl)-9H-carbazole-3,6-dicarboxylato)-triaqua-tri-copper unknown solvate]		green	Pm-3m	221	cubic	5.55	296	0.456	0.453	The SQUEEZE/PLATON program has been used to model some disorder.	synchrotron radiation; at 296 K		TEMP: at 296 K RADIATION: synchrotron radiation
KOZQIB	U.Stoeck, I.Senkovska, V.Bon, S.Krause, S.Kaskel	Chem.Commun.	2015	(C54 H34 Cu3 N2 O15)n	catena-[bis(mu!6$-9-(4'-carboxylatobiphenyl-4-yl)-9H-carbazole-3,6-dicarboxylato)-triaqua-tri-copper unknown solvate]		blue	Pm-3m	221	octahedron	4.53	296	0.29	0.289	The SQUEEZE/PLATON program has been used to model some disorder.	synchrotron radiation; at 296 K		TEMP: at 296 K RADIATION: synchrotron radiation
KUCDES	Tao Wu, Jian Zhang, Cong Zhou, Le Wang, Xianhui Bu, Pingyun Feng	J.Am.Chem.Soc.	2009	(C32 H40 B2 Li2 N16)n,0.5n(C4 H6 N2),0.3n(C6 H6),0.5n(H2 O1)	catena-(bis(mu!4$-tetrakis(4-Methylimidazol-1-yl)borate)-di-lithium 4-methylimidazole benzene solvate hemihydrate)	BIF-9-Li	colorless	P432	207	polyhedron	11.61	150	0.831	0.817	The 4-methylimidazole ring and the benzene solvent molecule are disordered by symmetry.		The structure contains 12% void space; Study temperature given as 100 K in the cif	TEMP: at 150 K COLOR: colorless "HABIT: polyhedron "ISO: isostructural with the Cu analogue
KUCDIW	Tao Wu, Jian Zhang, Cong Zhou, Le Wang, Xianhui Bu, Pingyun Feng	J.Am.Chem.Soc.	2009	(C32 H40 B2 Cu2 N16)n,1.5n(C6 H6)	catena-(bis(mu!4$-tetrakis(4-Methylimidazol-1-yl)borate)-di-copper(i) benzene solvate)	BIF-9-Cu	colorless	P432	207	polyhedron	5.38	150	0.945	0.943			The structure contains 18% void space	TEMP: at 150 K COLOR: colorless "HABIT: polyhedron "ISO: isostructural with the Li analogue
KUFTAI	Weijie Zhang, Pingping Jiang, Ying Wang, Jian Zhang, Pingbo Zhang	Catal.Lett	2015	(C96 H48 Fe3 Mn2 N8 O18)n	catena-[bis(mu-4,4',4'',4'''-porphine-5,10,15,20-tetrayltetrabenzoato)-dioxo-di-manganese-tri-iron unknown solvate]	Fe-MPOF	purple	P2/c	13		5.55	173	0.983	0.983	The SQUEEZE/PLATON program has been used to model some disorder.			TEMP: 173 K COLOR: purple "SENS: Moisture-sensitive
KULLAG	Guihong Yu, Shucai Gan	J.Mol.Struct.	2015	(C111 H76 Co5 N4 O24)n	catena-[tris(mu-4,4',4''-(benzene-1,3,5-triyltriethyne-2,1-diyl)tribenzoato)-(mu-aqua)-(mu-hydroxo)-tetrakis(N,N-dimethylformamide)-penta-cobalt unknown solvate]		violet	C2/c	15	block	6.65	120	0.937	0.937	The SQUEEZE/PLATON program has been used to model some disorder.			TEMP: at 120 K COLOR: violet "HABIT: block
KULLEK	Guihong Yu, Shucai Gan	J.Mol.Struct.	2015	(C103 H66 Co5 O25)n	catena-[tris(mu-4,4',4''-(benzene-1,3,5-triyltriethyne-2,1-diyl)tribenzoato)-(mu-hydroxo)-(mu-aqua)-aqua-tetrakis(methanol)-penta-cobalt unknown solvate]		violet	P21/c	14	block	9.07	120	0.871	0.871	The SQUEEZE/PLATON program has been used to model some disorder.			TEMP: at 120 K COLOR: violet "HABIT: block
KUMGUW	Jianghua Li, Ding Jia, Suci Meng, Jinfang Zhang, M.P.Cifuentes, M.G.Humphrey, Chi Zhang	Chem.-Eur.J.	2015	(C72 H48 Cu6 N36 S8 W2)n	catena-[octakis(mu-sulfido)-hexakis(mu-3,6-di(pyridin-4-yl)-1,2,4,5-tetrazine)-hexa-copper-di-tungsten]		black red	P-3c1	165	rectangular block	6.51	293	0.903	0		293 K		TEMP: 293 K COLOR: black red "HABIT: rectangular block
KUNSUJ	D.F.S.Gallis, L.E.S.Rohwer, M.A.Rodriguez, T.M.Nenoff	Chem.Mater.	2014	(C189 H117 Eu3 In3 O48)n,18n(C5 H11 N1 O1)	catena-[heptakis(mu-4,4',4''-benzene-1,3,5-tribenzoato)-hexaaqua-tri-europium-tri-indium N,N-diethylformamide solvate]		yellow	R-3	148	irregular	11.73	193	0.954	0.955	Disordered N,N-diethylformamide solvent molecules were not modelled and the disordered density was taken into account using the SQUEEZE/PLATON procedure.			TEMP: 193 K COLOR: yellow "HABIT: irregular
KUPTIA	Jing Wang, Jiahuan Luo, Xiaolong Luo, Jun Zhao, Dong-Sheng Li, Guanghua Li, Qisheng Huo, Yunling Liu	Cryst.Growth Des.	2015	(C22 H14 Cu2 I1 N4 O4)n,1.25n(C3 H7 N1 O1)	catena-[(mu-iodo)-bis(mu-4-(pyrimidin-5-yl)benzoato)-di-copper N,N-dimethylformamide solvate]		green	R-3	148	block	6.43	296	0.952	0.952		296 K	We calculate 33.94% void space in the structure	TEMP: 296 K COLOR: green "HABIT: block
KUSDOT	Chun-Yi Sun, Wai-Pong To, Xin-Long Wang, Kaai-Tung Chan, Zhong-Min Su, Chi-Ming Che	Chemical Science	2015	(C24 H12 Cd1 N6 O6 1-)n,C2 H8 N1 1+,5(C3 H7 N1 O1),1.5(H2 O1)	catena-[dimethylammonium (mu-3,3',3''-(1,3,5-triazine-2,4,6-triyltriimino)tribenzoato)-cadmium N,N-dimethylformamide solvate sesquihydrate]			C2/c	15		7.23	293	0.985	0.985	The structure is disordered. Disordered solvent molecules were not modelled and the disordered density was taken into account using the SQUEEZE/PLATON procedure.	293 K		TEMP: 293 K
KUVMIZ	F.L.Geyer, F.Rominger, Maximilian Vogtland, U.H.F.Bunz	Cryst.Growth Des.	2015	(C52 H36 Cu1 N4 O2 Si1 2+)n,2(N1 O3 1-)	catena-[(mu-4,4',4'',4'''-(silanetetrayltetrakis(4,1-phenyleneethyne-2,1-diyl))tetrapyridine)-diaqua-copper dinitrate]		blue	C2/c	15	polyhedron	13.33	200	0.433	0.417			The nitrate anions are not located	TEMP: 200 K COLOR: blue "HABIT: polyhedron
KUXREC	Yong-Sheng Wei, Mei Zhang, Pei-Qin Liao, Rui-Biao Lin, Tai-Yang Li, Guang Shao, Jie-Peng Zhang, Xiao-Ming Chen	Nat.Commun.	2015	(C24 H17 Fe3 O16)n	catena-[tris(mu!4$-terephthalato)-(mu!3$-oxido)-hydroxy-diaqua-tri-iron unknown solvate]	MIL-88B	brown	P63/mmc	194	Block	7.54	298	0.777	0.779	The ligand represented as hydroxy is a mixed hydroxy/fluoro ligand with occupancies 0.7534:0.2466. SQUEEZE/PLATON was used to model some disordered solvent molecules.	298 K		TEMP: 298 K COLOR: brown "HABIT: Block "SOURCE-CHEM: N,N-dimethylformamide
KUXROM	Yong-Sheng Wei, Mei Zhang, Pei-Qin Liao, Rui-Biao Lin, Tai-Yang Li, Guang Shao, Jie-Peng Zhang, Xiao-Ming Chen	Nat.Commun.	2015	(C45 H27 Fe3 N3 O13)n	catena-[tris(mu!4$-Terephthalato)-(mu!3$-1,3,5-tris(pyridin-4-yl)benzene)-(mu!3$-oxido)-tri-iron unknown solvate]	MIL-88B-tpb	black	P63/mmc	194	Block	6.61	298	0.886	0.886	The structure is disordered by symmetry. SQUEEZE/PLATON was used to model some disordered solvent molecules.	298 K		TEMP: 298 K COLOR: black "HABIT: Block
KUXRUS	Yong-Sheng Wei, Mei Zhang, Pei-Qin Liao, Rui-Biao Lin, Tai-Yang Li, Guang Shao, Jie-Peng Zhang, Xiao-Ming Chen	Nat.Commun.	2015	(C45 H33 Fe3 N3 O13)n	catena-[tris(mu!4$-terephthalato)-(mu!3$-1,3,5-tri(pyridin-4-yl)cyclohexane)-(mu!3$-oxido)-tri-iron unknown solvate]	MIL-88B-tpc	brown	P63/mmc	194	block	6.98	298	0.892	0.892	The structure is disordered by symmetry. SQUEEZE/PLATON was used to model some disordered solvent molecules.	298 K		TEMP: 298 K COLOR: brown "HABIT: block
KUXSAZ	Yong-Sheng Wei, Mei Zhang, Pei-Qin Liao, Rui-Biao Lin, Tai-Yang Li, Guang Shao, Jie-Peng Zhang, Xiao-Ming Chen	Nat.Commun.	2015	(C30 H17 F1 Fe3 N2 O14)n	catena-[tris(mu!4$-terephthalato)-(mu!3$-oxido)-(4-cyanopyridine)-fluoro-hydroxy-tri-iron unknown solvate]	4-pyCN@MIL-88B	black	P63/mmc	194	Block	12.68	361	0.749	0.726	The structure is disordered by symmetry. SQUEEZE/PLATON was used to model some disordered solvent molecules.			TEMP: 361 K COLOR: black "HABIT: Block
KUXSIH	Yong-Sheng Wei, Mei Zhang, Pei-Qin Liao, Rui-Biao Lin, Tai-Yang Li, Guang Shao, Jie-Peng Zhang, Xiao-Ming Chen	Nat.Commun.	2015	(C42 H24 Fe3 N6 O13)n	catena-[tris(mu!4$-terephthalato)-(mu!3$-2,4,6-tri(pyridin-4-yl)-1,3,5-triazine)-(mu!3$-oxido)-tri-iron]		black	P63/mmc	194	Block	14.35	328	0.926	0.926	The structure is disordered.			TEMP: 328 K COLOR: black "HABIT: Block
KUXSIH01	Yong-Sheng Wei, Mei Zhang, Pei-Qin Liao, Rui-Biao Lin, Tai-Yang Li, Guang Shao, Jie-Peng Zhang, Xiao-Ming Chen	Nat.Commun.	2015	(C42 H24 Fe3 N6 O13)n	catena-[tris(mu!4$-Terephthalato)-(mu!3$-2,4,6-tris(pyridin-4-yl)-1,3,5-triazine)-(mu!3$-oxido)-tri-iron unknown solvate]	MIL-88B-tpt	black	P63/mmc	194	Block	4.56	298	0.892	0.892	SQUEEZE/PLATON was used to model some disordered solvent molecules.	298 K		TEMP: 298 K COLOR: black "HABIT: Block
KUXSIH02	Yong-Sheng Wei, Mei Zhang, Pei-Qin Liao, Rui-Biao Lin, Tai-Yang Li, Guang Shao, Jie-Peng Zhang, Xiao-Ming Chen	Nat.Commun.	2015	(C42 H24 Fe3 N6 O13)n	catena-[tris(mu!4$-terephthalato)-(mu!3$-2,4,6-tri(pyridin-4-yl)-1,3,5-triazine)-(mu!3$-oxido)-tri-iron unknown solvate]	MIL-88B-tpt	black	P63/mmc	194	Block	3.88	361	0.896	0.896	SQUEEZE/PLATON was used to model some disordered solvent molecules.			TEMP: 361 K COLOR: black "HABIT: Block
KUXSIH03	Yong-Sheng Wei, Mei Zhang, Pei-Qin Liao, Rui-Biao Lin, Tai-Yang Li, Guang Shao, Jie-Peng Zhang, Xiao-Ming Chen	Nat.Commun.	2015	(C42 H24 Fe3 N6 O13)n	catena-[tris(mu!4$-terephthalato)-(mu!3$-2,4,6-tri(pyridin-4-yl)-1,3,5-triazine)-(mu!3$-oxido)-tri-iron unknown solvate]	MIL-88B-tpt	black	P63/mmc	194	Block	4.14	298	0.898	0.898	SQUEEZE/PLATON was used to model some disordered solvent molecules.	298 K		TEMP: 298 K COLOR: black "HABIT: Block
LABZEW	V.Bon, N.Kavoosi, I.Senkovska, P.Muller, J.Schaber, D.Wallacher, D.M.Tobbens, U.Mueller, S.Kaskel	Dalton Trans.	2016	(C26 H14 N4 O12 Zn3)n	catena-[bis(mu-2,2'-bipyridine-5,5'-dicarboxyliato)-bis(mu-formato)-tri-zinc unknown solvate]	JLU-Liu4	colorless	P43212	96	octahedron	2.87	296	0.938	0.938	Disordered solvent molecules were not modelled and the disordered density was taken into account using the SQUEEZE/PLATON procedure.	synchrotron; 296 K		TEMP: 296 K RADIATION: synchrotron
LABZIA	V.Bon, N.Kavoosi, I.Senkovska, P.Muller, J.Schaber, D.Wallacher, D.M.Tobbens, U.Mueller, S.Kaskel	Dalton Trans.	2016	(C28 H18 N4 O12 Zn3)n	catena-[bis(mu-2,2'-bipyridine-5,5'-dicarboxyliato)-bis(mu-acetato)-tri-zinc unknown solvate]		colorless	P43212	96	octahedron	3.13	296	0.973	0.973	Disordered solvent molecules were not modelled and the disordered density was taken into account using the SQUEEZE/PLATON procedure.	synchrotron; 296 K		TEMP: 296 K RADIATION: synchrotron
LACBID	Xiao-Qing Guo, Miao Wang, Yan-Feng Tang, Fei Meng, Guo-Qing Jiang, Jin-Li Zhu	CrystEngComm	2016	(C54 H40 Co7 N6 O34)n,3(H2 O1),3(C3 H7 N1 O1)	catena-[hexakis(mu-terephthalato)-bis(mu-2-nitro-1H-imidazol-1-yl)-hexa-aqua-hepta-cobalt N,N-dimethylformamide solvate trihydrate]		red	Cmca	64	block	8.16	296	0.995	0.869	Disordered solvent molecules were not modelled and the disordered density was taken into account using the SQUEEZE/PLATON procedure.	296 K		TEMP: 296 K OTHER-EXP: gas adsorption properties
LACNUB	Minghui Zhang, Liangliang Zhang, Zhenyu Xiao, Qinhui Zhang, Rongming Wang, Fangna Dai, Daofeng Sun	Scientific Reports	2016	(C162 H90 Cu6 O30)n	catena-[tris(mu-3,14-bis((3,5-dicarboxylatophenyl)ethynyl)nonacyclo[14.6.6.6$5,12!.0$2,15!.0$4,13!.0$6,11!.0$17,22!.0$23,28!.0$29,34!]tetratriaconta-2(15),3,6,8,10,13,17,19,21,23,25,27,29,31,33-pentadecaene)-hexaaqua-hexa-copper unknown solvate]	UPC-21	light green	C2/c	15	block	11.79	293	0.898	0.898	Disordered solvent molecules were not modelled and the disordered density was taken into account using the SQUEEZE/PLATON procedure.	293 K		TEMP: 293 K COLOR: light green "HABIT: block
LACYEW	B.K.Tripuramallu, I.Goldberg	Cryst.Growth Des.	2016	(C52 H30 N4 Na2 O21 Pr2 Zn1)n,x(C3 H7 N1 O1),x(H2 O1)	catena-[(mu-5-(10,15,20-tris(3,5-dicarboxyphenyl)porphyrin-5-yl)isophthalato)-pentaaqua-zinc-di-sodium-di-praseodymium N,N-dimethylformamide hydrate]		red	Imma	74	plate	8.36	110	0.958	0	Disordered solvent molecules were not modelled and the disordered density was taken into account using the SQUEEZE/PLATON procedure. The structure is disordered.			TEMP: 110 K COLOR: red "HABIT: plate
LACYIA	B.K.Tripuramallu, I.Goldberg	Cryst.Growth Des.	2016	6(C2 H8 N1 1+),n(C156 H96 N12 Na6 O63 Pr2 Zn3 6-),x(C3 H7 N1 O1),x(H2 O1)	catena-[hexakis(dimethylammonium) tris(mu-3-carboxy-5-(15-(3-carboxy-5-carboxylatophenyl)-10,20-bis(3,5-dicarboxylatophenyl)porphyrin-5-yl)benzoato)-pentadecakis(aqua)-hexa-sodium-di-praseodymium-tri-zinc N,N-dimethylformamide solvate hydrate]		red	P321	150	prism	2.85	110	0.88	0.824	Disordered solvent molecules and dimethylammonium cations were not modelled and the disordered density was taken into account using the SQUEEZE/PLATON procedure.	absolute configuration		TEMP: 110 K ABS-CONFIG: absolute configuration
LACYUM	B.K.Tripuramallu, I.Goldberg	Cryst.Growth Des.	2016	(C160 H79 Fe12 N12 O67 Zn3)n,x(C3 H7 N1 O1),x(H2 O1)	catena-[tris(mu-5-(10,15,20-tris(3,5-dicarboxyphenyl)porphyrin-5-yl)isophthalato)-tetrakis(mu-oxo)-tetrakis(mu-formato)-heptaaqua-tri-zinc-dodeca-iron N,N-dimethylformamide solvate hydrate]		red	P2/m	10	prism	5.86	110	0.98	0.958	Disordered solvent molecules were not modelled and the disordered density was taken into account using the SQUEEZE/PLATON procedure. The structure is disordered.			TEMP: 110 K COLOR: red "HABIT: prism
LACZEX	B.K.Tripuramallu, I.Goldberg	Cryst.Growth Des.	2016	(C52 H22 Co1 N4 Na4 O17)n,x(C3 H7 N1 O1),x(H2 O1)	catena-[(mu-5-(10,15,20-tris(3,5-dicarboxyphenyl)porphyrin-5-yl)isophthalato)-aqua-tetra-sodium-cobalt N,N-dimethylformamide hydrate]		red	Imma	74	prism	4.55	110	0.776	0.718	O5,O6 disordered over four configurations with occupancy 0.5; Disordered solvent molecules were not modelled and the disordered density was taken into account using the SQUEEZE/PLATON procedure.			TEMP: 110 K COLOR: red "HABIT: prism
LACZIB	B.K.Tripuramallu, I.Goldberg	Cryst.Growth Des.	2016	4(C2 H8 N1 1+),n(C52 H22 N4 Na4 O17 Zn1 4-),x(C3 H7 N1 O1),x(H2 O1)	catena-[tetrakis(dimethylammonium) (mu-5-(10,15,20-tris(3,5-dicarboxyphenyl)porphyrin-5-yl)isophthalato)-aqua-tetra-sodium-zinc N,N-dimethylformamide solvate hydrate]		red	I41/a	88	prism	4.52	110	0.898	0.722	O1,Zn1 disordered over four configurations with occupancy 0.5; Disordered dimethylammonium cation and solvent molecules were not modelled and the disordered density was taken into account using the SQUEEZE/PLATON procedure.			TEMP: 110 K COLOR: red "HABIT: prism
LAFQOA	Y.Inokuma, S.Yoshioka, M.Fujita	Angew.Chem.,Int.Ed.	2010	(C156 H96 Co6 N60 S12)n,6n(C4 H4 S1)	catena-[octakis(mu!3$-2,4,6-tris(3-Pyridyl)-1,3,5-triazine)-dodecakis(isothiocyano)-hexa-cobalt(ii) hexakis(thiophene) clathrate]		pale red	Fd-3c	228	cubic	11.94	90	0.836	0.836				TEMP: at 90 K COLOR: pale red "HABIT: cubic
LAFQUG	Y.Inokuma, S.Yoshioka, M.Fujita	Angew.Chem.,Int.Ed.	2010	(C156 H96 Co6 N60 S12)n,6n(C4 H4 O1)	catena-[octakis(mu!3$-2,4,6-tris(3-Pyridyl)-1,3,5-triazine)-dodecakis(isothiocyano)-hexa-cobalt(ii) hexakis(furan) clathrate]		pale red	Fd-3c	228	cubic	10.65	90	0.813	0.813				TEMP: at 90 K COLOR: pale red "HABIT: cubic
LAFRAN	Y.Inokuma, S.Yoshioka, M.Fujita	Angew.Chem.,Int.Ed.	2010	(C156 H96 Co6 N60 S12)n,6n(C4 H6 O1)	catena-[octakis(mu!3$-2,4,6-tris(3-Pyridyl)-1,3,5-triazine)-dodecakis(isothiocyano)-hexa-cobalt(ii) hexakis(2,3-dihydrofuran) clathrate]		pale red	Fd-3c	228	cubic	12.35	90	0.813	0.813	A dihydrofuran molecule is disordered by symmetry.			TEMP: at 90 K COLOR: pale red "HABIT: cubic
LAFRAN01	Guo-Hong Ning, Y.Inokuma, M.Fujita	Chem.Asian J.	2013	(C156 H96 Co6 N60 S12)n,6n(C4 H8 O1)	catena-[octakis(mu!3$-2,4,6-tris(3-Pyridyl)-1,3,5-triazine)-dodecakis(isothiocyano)-hexa-cobalt(ii) hexakis(tetrahydrofuran) clathrate]		pale red	Fd-3c	228		13.19	90	0.811	0.811	The structure is partially disordered.			TEMP: at 90 K COLOR: pale red
LAFRER	Y.Inokuma, S.Yoshioka, M.Fujita	Angew.Chem.,Int.Ed.	2010	(C156 H96 Co6 N60 S12)n,3n(C12 H10 O1)	catena-[octakis(mu!3$-2,4,6-tris(3-Pyridyl)-1,3,5-triazine)-dodecakis(isothiocyano)-hexa-cobalt(ii) tris(diphenyl ether) clathrate]		pale red	Fd-3c	228	cubic	15.05	90	0.807	0.807				TEMP: at 90 K COLOR: pale red "HABIT: cubic
LAFROB	Y.Inokuma, S.Yoshioka, M.Fujita	Angew.Chem.,Int.Ed.	2010	(C156 H96 Co6 N60 S12)n,6.32n(C10 H12),7.75n(C5 H6)	catena-[octakis(mu!3$-2,4,6-tris(3-Pyridyl)-1,3,5-triazine)-dodecakis(isothiocyano)-hexa-cobalt(ii) cyclopentadiene tricyclo[5.2.1.0$2,6!]deca-3,8-diene clathrate]		pale red	Fd-3c	228	cubic	11.63	90	0.984	0.984	The structure is partially disordered over two sites with occupancies 0.50:0.50.			TEMP: at 90 K COLOR: pale red "HABIT: cubic
LAJDUY	Sung-min Hyun, Jae Hwa Lee, Gwan Yeong Jung, Yun Kyeong Kim, Tae Kyung Kim, Sungeun Jeoung, Sang Kyu Kwak, Dohyun Moon, Hoi Ri Moon	Inorg.Chem.	2016	(C44 H74 N12 Ni2 O8)n	catena-[(mu-biphenyl-2,2',5,5'-tetracarboxylato)-bis(3,10-dipropyl-1,3,5,8,10,12-hexaazacyclotetradecane)-di-nickel unknown solvate]		pale purple	C2/c	15	block	3.63	195	0.942	0.942	C2A1,C3A1,C5A1,C6A1,C7A1,N3A1 and C2A2,C3A2,C5A2,C6A2,C7A2,N3A2 disordered over two sites with occupancies 0.648:0.352; Disordered solvent molecules were not modelled and the disordered density was taken into account using the SQUEEZE/PLATON procedure.	synchrotron		TEMP: 195 K RADIATION: synchrotron
LAJLAL	R.A.Smaldone, R.S.Forgan, H.Furukawa, J.J.Gassensmith, A.M.Z.Slawin, O.M.Yaghi, J.F.Stoddart	Angew.Chem.,Int.Ed.	2010	(C48 H80 K2 O40 2+)n,2n(H1 O1 1-)	catena-((mu!8$-gamma-Cyclodextrin)-di-potassium dihydroxide)		colorless	I432	211	prism	23.91	93	0.942	0.942				TEMP: at 93 K COLOR: colorless "HABIT: prism
LAJLEP	R.A.Smaldone, R.S.Forgan, H.Furukawa, J.J.Gassensmith, A.M.Z.Slawin, O.M.Yaghi, J.F.Stoddart	Angew.Chem.,Int.Ed.	2010	(C48 H80 O40 Rb2 2+)n,2n(H1 O1 1-)	catena-((mu!8$-gamma-Cyclodextrin)-di-rubidium dihydroxide)		colorless	I432	211	prism	11.47	93	0.997	0.997				TEMP: at 93 K COLOR: colorless "HABIT: prism
LAJNIW	Carol Hua, B.F.Abrahams, D.M.D'Alessandro	Cryst.Growth Des.	2016	(C135 H108 Co3 N12 O12)n	catena-[tris(mu-4-(pyridin-4-yl)-N,N-bis(4-(pyridin-4-yl)phenyl)aniline)-tris(mu-tetramethylterephthalato)-tri-cobalt unknown solvate]	catena-[tris(mu-tris(4-(pyridin-4-yl)phenyl)amine)-tris(mu-2,3,5,6-tetramethyl-1,4-benzenedicarboxylato)-tri-cobalt unknown solvate]	purple	Cc	9	block	5.96	100	0.976	0.969	Disordered solvent molecules were not modelled and the disordered density was taken into account using the SQUEEZE/PLATON procedure.	synchrotron; twin		TEMP: 100 K RADIATION: synchrotron "OTHER-DIFF: twin
LAXJAX	Y.Inokuma, Guo-Hong Ning, M.Fujita	Angew.Chem.,Int.Ed.	2012	(C156 H96 Co6 N60 S12)n,2.16n(C2 H3 N1 S1)	catena(octakis(mu!3$-tris(3-pyridyl)triazine)-dodecaisothiocyanate-hexa-cobalt methylisothiocyanate solvate)		red	Fd-3c	228	cubic	14.24	90	0.749	0.749				TEMP: at 90 K COLOR: red "HABIT: cubic
LECFAC	J.Lincke, D.Lassig, M.Kobalz, J.Bergmann, M.Handke, J.Mollmer, M.Lange, C.Roth, A.Moller, R.Staudt, H.Krautscheid	Inorg.Chem.	2012	(C120 H76 Cu18 N36 O74 S4)n	catena-(dodecakis(mu!5$-5-(4H-1,2,4-Triazol-4-yl)isophthalato)-tetrakis((mu!3$-hydroxo)-(mu!3$-sulfato))-hexa-aqua-octadeca-copper)		blue	I-43m	217	block	3.64	100	0.859	0.859		twin		TEMP: at 100 K OTHER-DIFF: twin
LECFEG	J.Lincke, D.Lassig, M.Kobalz, J.Bergmann, M.Handke, J.Mollmer, M.Lange, C.Roth, A.Moller, R.Staudt, H.Krautscheid	Inorg.Chem.	2012	(C120 H76 Cu18 N36 O74 Se4)n	catena-(dodecakis(mu!5$-5-(4H-1,2,4-Triazol-4-yl)isophthalato)-tetrakis((mu!3$-hydroxo)-(mu!3$-selenato))-hexa-aqua-octadeca-copper)		blue	I-43m	217	block	3.64	100	0.904	0.904		merohedral twin		TEMP: at 100 K OTHER-DIFF: merohedral twin
LEDKEM	Hyunuk Kim, Minyoung Yoon, Gang Ho Lee, Dong-Heon Lee, Joongpyo Shim, Kimoon Kim, Gyungse Park	Inorg.Chem.Commun.	2012	(C26 H18 Co1 N2 O4)n,n(H2 O1)	catena-[(mu!2$-4,4'-Ethene-1,2-diyldibenzoato-O,O':O'',O''')-(2,2'-bipyridine)-cobalt(ii) unknown solvate monohydrate]		purple	C2/c	15	needle	6.94	173	0.762	0.762	O1W disordered by symmetry over two sites with occupancy 0.50. The 4,4'-ethene-1,2-diyldibenzoate ligand is disordered by symmetry. Disordered solvent molecules were not modelled and the disordered density was taken into account using the SQUEEZE/PLATON procedure, with total electron density of ca. 2158 electrons per unit cell.			TEMP: at 173 K COLOR: purple "HABIT: needle
LEHXUT	Baishu Zheng, Zhen Yang, Junfeng Bai, Yizhi Li, Shuhua Li	Chem.Commun.	2012	(C204 H132 Cu12 N12 O72)n	catena-(tetrakis(mu!12$-1,3,5-tris(4-(3,5-Dicarboxylatophenylaminocarbonyl)phenyl)benzene)-dodeca-aqua-dodeca-copper unknown solvate)		blue	Fm-3m	225	polyhedra	3.98	291	0.427	0.427	PLATON/SQUEEZE was used to take into account some unidentified disordered solvent.	at 291 K		TEMP: at 291 K COLOR: blue "HABIT: polyhedra
LEJCAG	Ya-Qian Lan, Hai-Long Jiang, Shun-Li Li, Qiang Xu	Adv.Mater.	2011	(C111 H96 O50 Zn8)n	catena-(tris(mu!8$-4-(3-(4-carboxylato-2-methoxyphenoxy)-2,2-bis[(4-carboxylato-2-methoxyphenoxy)methyl]propoxy)-3-methoxybenzoato)-bis(mu!4$-oxo)-octa-zinc(ii) unknown solvate)		colorless	R-3c	167	block	4.97	293	0.515	0.515	The disordered unknown solvent molecules were not modelled and the disordered density was taken into account using the SQUEEZE/PLATON procedure.	at 293 K		TEMP: at 293 K COLOR: colorless "HABIT: block
LEJCEK	Ya-Qian Lan, Hai-Long Jiang, Shun-Li Li, Qiang Xu	Adv.Mater.	2011	(C135 H120 O50 Zn8)n	catena-(tris(mu!8$-3-(4-[3-(4-[2-carboxylatoethenyl]-2-methoxyphenoxy)-2,2-bis((4-[2-carboxylatoethenyl]-2-methoxyphenoxy)methyl)propoxy]-3-methoxyphenyl)prop-2-enoato)-bis(mu!4$-oxo)-octa-zinc(ii) unknown solvate)		colorless	R-3c	167	block	8.41	293	0.334	0.334	The disordered unknown solvent molecules were not modelled and the disordered density was taken into account using the SQUEEZE/PLATON procedure.	at 293 K		TEMP: at 293 K COLOR: colorless "HABIT: block
LEJCIO	Ya-Qian Lan, Hai-Long Jiang, Shun-Li Li, Qiang Xu	Adv.Mater.	2011	(C147 H96 O38 Zn8)n	catena-(tris(mu!8$-6-(3-[(6-carboxylatonaphthalen-2-yl)oxy]-2,2-bis([(6-carboxylatonaphthalen-2-yl)oxy]methyl)propoxy)naphthalene-2-carboxylato)-bis(mu!4$-oxo)-octa-zinc(ii) unknown solvate)		colorless	R-3c	167	block	5.94	293	0.326	0.326	TThe disordered unknown solvent molecules were not modelled and the disordered density was taken into account using the SQUEEZE/PLATON procedure.	at 293 K		TEMP: at 293 K COLOR: colorless "HABIT: block
LELDOX	Weigang Lu, Daqiang Yuan, T.A.Makal, Zhangwen Wei, Jian-Rong Li, Hong-Cai Zhou	Dalton Trans.	2013	(C36 H24 Cu2 N2 O12)n	catena-((mu!8$-9,9'-(2,5-dimethoxybenzene-1,4-diyl)bis(9H-carbazole-3,6-dicarboxylato))-diaqua-di-copper(ii) unknown solvate)	PCN-82	green	Fm-3m	225	block	12.54	110	0.499	0.499	The structure is disordered by symmetry. The disordered unknown solvent molecules were not modelled and the disordered density was taken into account using the SQUEEZE/PLATON procedure.	synchrotron radiation		TEMP: at 110 K RADIATION: synchrotron radiation
LELDUD	Weigang Lu, Daqiang Yuan, T.A.Makal, Zhangwen Wei, Jian-Rong Li, Hong-Cai Zhou	Dalton Trans.	2013	(C34 H20 Cu2 N2 O10)n	catena-((mu!8$-9,9'-benzene-1,4-diylbis(9H-carbazole-3,6-dicarboxylato))-diaqua-di-copper(ii) unknown solvate)	PCN-81	green	Pa-3	205	block	11.25	173	0.481	0.481	The disordered unknown solvent molecules were not modelled and the disordered density was taken into account using the SQUEEZE/PLATON procedure.	synchrotron radiation		TEMP: at 173 K RADIATION: synchrotron radiation
LELMEW	Ting-Ting Lian, Shu-Mei Chen, Fei Wang, Jian Zhang	CrystEngComm	2013	(C18 H32 Cu3 N3 O14 1+)n,n(N1 O3 1-)	catena-((mu!6$-Benzene-1,3,5-tricarboxylato)-(mu!3$-cyano)-(mu!2$-1,4-diazabicyclo[2.2.2]octane)-octa-aqua-tri-copper nitrate)		blue	Fm-3m	225	block	4.79	293	0.162	0	The SQUEEZE/PLATON program may have been used.	at 293 K	Large structure in which program limits have been exceeded. A full set of coordinates are available from the deposited CIF	TEMP: at 293 K COLOR: blue "HABIT: block
LEQBUG	Zhangwen Wei, Weigang Lu, Hai-Long Jiang, Hong-Cai Zhou	Inorg.Chem.	2013	(C78 H72 N4 O20 Zn4)n	catena-((mu!16$-4',4''',4''''',4'''''''-Ethene-1,1,2,2-tetrayltetrakis(((1,1'-biphenyl)-3,5-dicarboxylate)))-tetrakis(N,N-diethylformamide)-tetra-zinc unknown solvate)	PCN-921	colorless	I4/mmm	139	block	5.67	110	0.831	0	C10,C11 and C7,C8 disordered over two sites with occupancies 0.50:0.50. The diethylformamide ligands were modelled as oxygen atoms. Some unidentified disordered solvent molecules were taken into account using PLATON/SQUEEZE.			TEMP: at 110 K COLOR: colorless "HABIT: block "SENS: moisture-sensitive
LEQCAN	Zhangwen Wei, Weigang Lu, Hai-Long Jiang, Hong-Cai Zhou	Inorg.Chem.	2013	(C70 H56 Cu4 N4 O20)n	catena-((mu!16$-4',4''',4''''',4'''''''-Ethene-1,1,2,2-tetrayltetrakis(((1,1'-biphenyl)-3,5-dicarboxylate)))-tetrakis(N,N-dimethylformamide)-tetra-copper unknown solvate)	PCN-922	green	I4/mmm	139	block	9.02	110	0.823	0	C7,C8 and C10,C11 disordered over two sites with occupancies 0.50:0.50. The dimethylformamide ligands were modelled as oxygen atoms. Some unidentified disordered solvent molecules were taken into account using PLATON/SQUEEZE.			TEMP: at 110 K COLOR: green "HABIT: block
LIBHAH	Daqiang Yuan, R.B.Getman, Zhangwen Wei, R.Q.Snurr, Hong-Cai Zhou	Chem.Commun.	2012	(C30 H12 Fe3 O16 S6)n	catena-(bis(mu!6$-benzo[1,2-b:3,4-b':6,5-b'']tristhiophene-2,5,8-tricarboxylato)-(mu!3$-oxo)-triaqua-di-iron(iii)-iron(ii) unknown solvate)	PCN-53	red	Fd-3m	227	prism	6.76	163	0.6	0.6	The structure is disordered;The SQUEEZE/PLATON program has been used to model some disorder.	synchrotron		TEMP: 163 K RADIATION: synchrotron
LIDSAU	Huijun Li, Yi Han, Xiaofeng Lv, Shanshan Du, Hongwei Hou, Yaoting Fan	CrystEngComm	2013	(C26 H20 N2 Ni2 O11)n	catena-[bis(mu!4$-5-(Pyridin-4-yl)isophthalato)-(mu!2$-aqua)-diaqua-di-nickel(ii) unknown solvate]		brown	C2/c	15	block	7.61	296	0.978	0.979	C10',C11',C12',C13',C9',N1' and C10,C11,C12,C13,C9,N1 disordered over two sites with occupancies 0.5146:0.4854. The single independent metal site is modelled with mixed Ni:Co occupancy. The two metals are disordered with occupancies 0.53:0.47, the sum formula is C26 H20 Co0.94 N2 Ni1.06 O11. Disordered solvent molecules were not modelled and the disordered density was taken into account using the…	at 296 K		TEMP: at 296 K COLOR: brown "HABIT: block
LIDSEY	Huijun Li, Yi Han, Xiaofeng Lv, Shanshan Du, Hongwei Hou, Yaoting Fan	CrystEngComm	2013	(C26 H20 N2 Ni2 O11)n	catena-[bis(mu!4$-5-(Pyridin-4-yl)isophthalato)-(mu!2$-aqua)-diaqua-di-nickel(ii) unknown solvate]		green	C2/c	15	prism	4.3	293	0.985	0.985	C1',C2',C3',C4',C5',N1' and C1,C2,C3,C4,C5,N1 disordered over two sites with occupancies 0.513:0.487. Disordered solvent molecules were not modelled and the disordered density was taken into account using the SQUEEZE/PLATON procedure. The unit cell was found to contain a void of 2071 A$3! holding 490 electrons.	at 293 K		TEMP: at 293 K COLOR: green "HABIT: prism
LIDSIC	Huijun Li, Yi Han, Xiaofeng Lv, Shanshan Du, Hongwei Hou, Yaoting Fan	CrystEngComm	2013	(C52 H40 Co4 N4 O22)n	catena-[tetrakis(mu!4$-5-(Pyridin-4-yl)isophthalato)-bis(mu!2$-aqua)-tetra-aqua-tetra-cobalt(ii) unknown solvate]		pink	P-1	2	prism	6.45	296	0.972	0.972	C27',C28',C29',C30',C31',N3' and C27,C28,C29,C30,C31, N3 disordered over two sites with occupancies 0.55:0.45; C40,C41,C42, C43,C44,N4 and C40',C41',C42',C43',C44',N4' disordered over two sites with occupancies 0.514:0.486; Disordered solvent molecules were not modelled and the disordered density from a void space of 2339 A$3! was taken into account using the SQUEEZE/PLATON procedure.	at 296 K		TEMP: at 296 K COLOR: pink "HABIT: prism
LIHFAK	C.A.Bauer, T.V.Timofeeva, T.B.Settersten, B.D.Patterson, V.H.Liu, B.A.Simmons, M.D.Allendorf	J.Am.Chem.Soc.	2007	(C48 H30 O13 Zn4)n	catena-((mu!4$-Oxo)-tris(mu!4$-trans-4,4'-stilbenedicarboxyalato)-tetra-zinc unknown guest clathrate)		colorless	Pnnm	58	prism	6.56	100	0.503	0	The authors report disordered guest molecules which were not modelled, the disordered density was taken into account with SQUEEZE/PLATON.			TEMP: at 100.0 K OTHER-EXP: photoluminescent
LIKDOA	Guo-Qiang Kong, Zhi-Da Han, Yabing He, Sha Ou, Wei Zhou, T.Yildirim, R.Krishna, Chao Zou, Banglin Chen, Chuan-De Wu	Chem.-Eur.J.	2013	(C26 H20 Cu3 O15)n,5n(C3 H7 N1 O1),6.5n(H2 O1)	catena-[bis(mu!6$-3,5-bis(2-Carboxylatoethenyl)benzoato)-triaqua-tri-copper(ii) N,N-dimethylformamide solvate hydrate]	ZJU-36	blue	Fm-3m	225	block	6.82	293	0.871	0.534	The ligand is disordered by symmetry. Disordered solvent molecules were not modelled and the disordered density was taken into account using the SQUEEZE/PLATON procedure. The unit cell was found to contain a void of 29199 A$3! holding 5236 electrons.	at 293 K		TEMP: at 293 K COLOR: blue "HABIT: block "ISO: Isomorphous with the ZJU-35 analogue
LIKGUJ	Guo-Qiang Kong, Zhi-Da Han, Yabing He, Sha Ou, Wei Zhou, T.Yildirim, R.Krishna, Chao Zou, Banglin Chen, Chuan-De Wu	Chem.-Eur.J.	2013	(C22 H17 Cu3 O15)n,2n(C3 H7 N1 O1),5.5n(H2 O1)	catena-[bis(mu!6$-5-(2-Carboxylatoethenyl)benzene-1,3-dicarboxylato)-triaqua-tri-copper(ii) N,N-dimethylformamide solvate hydrate]	ZJU-35	blue	Fm-3m	225	block	7.83	293	0.958	0.712	The structure is disordered. Disordered solvent molecules were not modelled and the disordered density was taken into account using the SQUEEZE/PLATON procedure. The unit cell was found to contain a void of 16173 A$3! holding 1613 electrons.	at 293 K		TEMP: at 293 K COLOR: blue "HABIT: block "ISO: Isomorphous with the ZJU-36 analogue
LILPAZ	Christian Heering, I.Boldog, V.Vasylyeva, Joaquin Sanchiz, C.Janiak	CrystEngComm	2013	(C72 H60 Co8 N12 O14)0.5n	catena-[tetrakis(mu!4$-4-Benzoato-3,5-dimethylpyrazolato)-(mu!4$-oxo)-tetra-cobalt unknown solvate]		blue	P222	16	cubic	6.91	95	0.51	0.504	The structure is disordered by symmetry. The SQUEEZE/PLATON program has been used to model some disordered solvent molecules.	absolute configuration		TEMP: 95 K ABS-CONFIG: absolute configuration
LIQDAS	Keunil Hong, Hyungphil Chun	Chem.Commun.	2013	(C79 H48 N2 O36 Ti2 Zn6)n	catena-[hexakis(mu!4$-3-Oxidonaphthalene-2,7-dicarboxylato)-(mu!3$-carbonato)-(mu!2$-1,4-diazabicyclo[2.2.2]octane)-triaqua-di-titanium(iv)-hexa-zinc(ii) unknown solvate]	ZTOF-2	orange	P63/m	176	Hexagonal prism	8.5	100	0.752	0.752	Disordered solvent molecules were not modelled and the disordered density was taken into account using the SQUEEZE/PLATON procedure. The unit cell was found to contain a void of 6135 A$3! holding 845 electrons.	synchrotron		TEMP: 100 K RADIATION: synchrotron
LIXCOM	Xiao-Hua Wei, Lin-Yan Yang, Sheng-Yun Liao, Ming Zhang, Jin-Lei Tian, Pei-Yao Du, Wen Gu, Xin Liu	Dalton Trans.	2014	(C21 H13 O9 Pr1)n,0.5n(H2 O1)	catena-((mu!6$-3,5-bis(4-Carboxylatophenoxy)benzoato)-aqua-praseodymium hydrate)		green	C2/c	15	block	6.53	293	0.909	1.811	The SQUEEZE/PLATON program was used to model some additional disordered water molecules.	at 293 K		TEMP: at 293 K COLOR: green "HABIT: block
LIZZAX	C.S.Hawes, Y.Nolvachai, Chadin Kulsing, G.P.Knowles, A.L.Chaffee, P.J.Marriott, S.R.Batten, D.R.Turner	Chem.Commun.	2014	(C40 H40 Cd2 N4 O8)n	catena-[(mu!5$-4,4',4'',4'''-(1,4,7,10-tetraazacyclododecane-1,4,7,10-tetrayltetramethanediyl)tetrabenzoato)-di-cadmium unknown solvate]		colorless	Cmca	64	rod	7.88	273	0.81	0.81	C10,C11,C13,C14,C4,C5,C7,C8,N12,N3,N6,N9,O38,O39 disordered by symmetry over two configurations with occupancy 0.50; O38 and O39 disordered over two sites with occupancies 0.50:0.50; The SQUEEZE/PLATON program has been used to model some disorder.	synchrotron		TEMP: 273.1 K RADIATION: synchrotron
LOFJAT	Xing Duan, Qi Zhang, Jianfeng Cai, Yuanjing Cui, Chuande Wu, Yu Yang, Guodong Qian	Microporous and Mesoporous Materials	2014	(C29 H16 Cu2 O11)n	catena-((mu!8$-5,5'-(9-Oxo-9H-fluorene-2,7-diyl)di-isophthalato)-diaqua-di-copper unknown clathrate)	ZJU-61	green	P63/mmc	194	block	5.91	293	0.649	0.649	C10,C7,C7',C8,C8',O4 disordered by symmetry over two configurations with occupancy 0.50. The SQUEEZE/PLATON program has been used to model the disordered guest molecules.	at 293 K		TEMP: at 293 K COLOR: green "HABIT: block
LOGXEM	Jian-Bing Jiang, Yin-Yin Wu, Peng Wang, Peng Huo, Qin-Yu Zhu, Jie Dai	Dyes Pigm.	2014	(C228 H190 Cd32 S38 Se14)n,C30 H24 N6 Ru1	catena-[tris(2,2'-bipyridine)-ruthenium tetradecakis(mu-selenido)-octatriacontakis(mu-benzenethiolate)-dotriaconta-cadmium]			I-42d	122		9.2	293	0.93	1.557	The structure is disordered.	at 293 K	A number of atoms are missing in the cif	TEMP: at 293 K
LOKGEY	Chun-Wei Yeh, J.-D.Chen, Ju-Chun Wang	Polyhedron	2008	(C50 H40 Cl2 Cu1 N8 O4)n	catena-[bis(mu!2$-N,N'-(Methylenedi-p-phenylene)bis(pyridine-4-carboxamide))-dichloro-copper(ii) unknown solvate]		blue	C2/c	15	block	6.61	295	0.96	0.96	Disordered solvent molecules, presumed to be dimethylformamide and/or water, were removed using SQUEEZE/PLATON.	at 295 K		TEMP: at 295 K OTHER-EXP: luminescent
LUHVUH	Ryan Luebke, Y.Belmabkhout, L.J.Weselinski, A.J.Cairns, M.Alkordi, G.Norton, L.Wojtas, K.Adil, M.Eddaoudi	Chemical Science	2015	(C114 H98 O50 Y6 2-)n,n(H2 O1),2n(C2 H8 N1 1+)	catena-[bis(dimethylammonium) octakis(mu-hydroxo)-tris(mu-1,2,4,5-tetrakis[(4-carboxylato)phenoxymethyl]benzene)-hexaaqua-hexa-yttrium unknown solvate monohydrate]	Y-ftw-MOF-1	colorless	Pm-3m	221	cubes	8.34	100	0.672	0	The structure is severely disordered by symmetry; Disordered counterions and solvent molecules were not modelled and the disordered density was taken into account using the SQUEEZE/PLATON procedure.			TEMP: 100 K COLOR: colorless "HABIT: cubes
LUKLIN	Xi-Sen Wang, Shengqian Ma, Daqiang Yuan, Ji Woong Yoon, Young Kyu Hwang, Jong-San Chang, Xiaoping Wang, M.R.Jorgensen, Yu-Sheng Chen, Hong-Cai Zhou	Inorg.Chem.	2009	(C42 H24 Cu3 O15)n	catena-(bis(mu!6$-4,4',4''-s-triazine-2,4,6-triyltribenzoato)-tri-aqua-tri-copper)		blue	F432	209	block	6.66	20	0.494	0.494		synchrotron radiation		TEMP: at 20 K RADIATION: synchrotron radiation
LULVEV	Jie Bai, Hao-Long Zhou, Pei-Qin Liao, Wei-Xiong Zhang, Xiao-Ming Chen	CrystEngComm	2015	(C26 H16 N2 O4 Zn1)n	catena-[(mu-4,4'-ethyne-1,2-diyldibenzoato)-(2,2'-bipyridine)-zinc]		colorless	C2/c	15	needle	6.89	123	0.802	0.801	The structure is disordered; Disordered unknown guest molecules described in the paper were not modelled and the disordered density was taken into account using the SQUEEZE/PLATON procedure.			TEMP: 123 K COLOR: colorless "HABIT: needle
LUNHUZ	K.S.Suslick, P.Bhyrappa, J.-H.Chou, M.E.Kosal, S.Nakagaki, D.W.Smithenry, S.R.Wilson	Acc.Chem.Res.	2005	(C312 H228 N24 O26 Zn14)n	catena-[hexakis(mu-5,15-bis(4-carboxylatophenyl)-10,20-bis(2,4,6-trimethylphenyl)porphyrin-21,23-diyl)-bis(mu-oxido)-tetradeca-zinc unknown solvate]		purple	Fd-3	203	prism	19.22	295	0.561	0.561	The structure is disordered by symmetry. Disordered solvent molecules were not modelled and the disordered density was taken into account using the SQUEEZE/PLATON procedure.	295 K		TEMP: 295 K OTHER-EXP: The data crystal was mounted using mother liquor in a 0.3 mm capillary.
LUPSAS	Xiao-Li Hu, Chao Qin, Xin-Long Wang, Kui-Zhan Shao, Zhong-Min Su	Chem.Commun.	2015	(C92 H51 N5 O32 Zn8 2-)n,2(C2 H8 N1 1+),6(C4 H9 N1 O1)	catena-[bis(dimethylammonium) tetrakis(mu!6$-4,4',4''-nitrilotribenzoato)-bis(mu!4$-oxido)-(mu!2$-2-nitroterephthalato)-octa-zinc N,N-dimethylacetamide solvate]		yellow	P21/c	14	block	4.54	296	0.747	0	The structure is disordered. The SQUEEZE/PLATON program has been used to model some disorder.	296 K		TEMP: 296 K COLOR: yellow "HABIT: block
LURGEL	T.Gadzikwa, O.K.Farha, C.D.Malliakas, M.G.Kanatzidis, J.T.Hupp, S.T.Nguyen	J.Am.Chem.Soc.	2009	(C51 H36 N2 O8 Si1 Zn2)n	catena-[(mu!8$-1,2,4,5-tetrakis(4-Carboxylatophenyl)benzene)-(mu!2$-(E)-1-(pyridin-4-yl)-2-(3-(trimethylsilylethynyl)pyridin-4-yl)ethene)-di-zinc(ii) unknown solvate]	TO-MOF	pale yellow	P1	1		6.96	190	0.532	0.532	The SQUEEZE/PLATON program has been used to model disordered electron density found in the cavities of the framework. The unit cell was found to contain a void of 2242 A$3!, holding 245 electrons. The authors state the trimethylsilane moiety is severely disordered, this disorder has not been modelled from the data in the deposited cif.			TEMP: at 190 K COLOR: pale yellow
LUTZEH	Teng-Hao Chen, I.Popov, W.Kaveevivitchai, Yu-Chun Chuang, Yu-Sheng Chen, A.J.Jacobson, O.S.Miljanic	Angew.Chem.,Int.Ed.	2015	(C54 H12 Cu3 F24 O15)n	catena-(bis(mu!6$-1,3,5-tris(4-Carboxylato-2,3,5,6-tetrafluorophenyl)benzene)-triaqua-tri-copper unknown solvate)	MOFF-4	greenish blue	Fm-3m	225	Cubic	11.3	293	0.388	0.386	The structure is disordered by symmetry. The SQUEEZE/PLATON program was used to model some disordered solvent.	293 K		TEMP: 293 K COLOR: greenish blue "HABIT: Cubic "SOURCE-CHEM: Solvothermal crystallization
LUYSOP	T.N.Tu, K.D.Nguyen, T.N.Nguyen, Thanh Truong, N.T.S.Phan	Cat.Sci.Tech.	2016	(C22 H20 Co2 N2 O8)n	catena-(bis(mu!4$-1,4-Benzenedicarboxylato)-(mu!2$-1,4-diazabicyclo(2.2.0)octane)-di-cobalt unknown solvate)	VNU-10	green	P6/mmm	191	needle	5.24	100	0.732	0.732	C3,C6 disordered by symmetry over two configurations with occupancy 0.50; The SQUEEZE/PLATON program has been used to model some disorder.			TEMP: 100 K COLOR: green "HABIT: needle
MAFFUW	Wenge Qiu, J.A.Perman, L.Wojtas, M.Eddaoudi, M.J.Zaworotko	Chem.Commun.	2010	(C62 H51 Cu6 N1 O35)n	catena-[tris(mu!8$-1,3-bis(3,5-dicarboxylatophenoxy)propane)-pentaaqua-pyridine-hexa-copper unknown solvate]		blue	Pnma	62	block	8.81	100	0.7	0.7	The structure is disordered, partially by symmetry. The SQUEEZE/PLATON program has been used to model the disordered solvent.			TEMP: at 100 K COLOR: blue "HABIT: block
MAFJIO	Wenge Qiu, J.A.Perman, L.Wojtas, M.Eddaoudi, M.J.Zaworotko	Chem.Commun.	2010	(C19 H16 Cu2 O12)n	catena-[(mu!8$-1,3-bis(3,5-dicarboxylatophenoxy)propane)-diaqua-di-copper unknown solvate]		blue	P6322	182	hexagon	3.28	100	0.828	0.828	The SQUEEZE/PLATON program has been used to model some disordered solvent.	racemic twin		TEMP: at 100 K OTHER-DIFF: racemic twin
MAFWEY	C.L.Hobday, R.J.Marshall, C.F.Murphie, J.Sotelo, T.Richards, D.R.Allan, T.Duren, F.-X.Coudert, R.S.Forgan, C.A.Morrison, S.A.Moggach, T.D.Bennett	Angew.Chem.	2016	(C42 H26 N6 O16 Zr3)n	catena-[tris(mu-4,4'-(diazenediyl)dibenzoato)-bis(mu-hydroxo)-bis(mu-oxido)-tri-zirconium unknown solvate]	UiO-abdc	colorless	Fm-3m	225	block	8.29	100	0.904	0.624	The structure is disordered. Disordered solvent molecules were not modelled and the disordered density was taken into account using the SQUEEZE/PLATON procedure.		Study temperature given as 100 K and 298 K in the CIF	TEMP: 100 K COLOR: colorless "HABIT: block
MAHCEG	Ruyi Zou, Pei-Zhou Li, Yong-Fei Zeng, Jia Liu, Ruo Zhao, Hui Duan, Zhong Luo, Jin-Gui Wang, Ruqiang Zou, Yanli Zhao	Small	2016	(C126 H66 Cu3 N6 O47 Zn8)n	catena-[hexakis(mu-10-(4-carboxylatophenyl)-10H-phenoxazine-3,7-dicarboxylato)-bis(mu-oxo)-triaqua-tri-copper-octa-zinc unknown solvate]			I23	197		6.53	293	0.541	0.54	Disordered solvent molecules were not modelled and the disordered density was taken into account using the SQUEEZE/PLATON procedure.	293 K		TEMP: 293 K
MAHCIK	Ruyi Zou, Pei-Zhou Li, Yong-Fei Zeng, Jia Liu, Ruo Zhao, Hui Duan, Zhong Luo, Jin-Gui Wang, Ruqiang Zou, Yanli Zhao	Small	2016	(C126 H66 N6 O47 Zn11)n	catena-[hexakis(mu-10-(4-carboxylatophenyl)-10H-phenoxazine-3,7-dicarboxylato)-bis(mu-oxo)-triaqua-undeca-zinc unknown solvate]			I23	197		4.3	293	0.549	0.548	Disordered solvent molecules were not modelled and the disordered density was taken into account using the SQUEEZE/PLATON procedure.	293 K		TEMP: 293 K
MAHCOQ	Ruyi Zou, Pei-Zhou Li, Yong-Fei Zeng, Jia Liu, Ruo Zhao, Hui Duan, Zhong Luo, Jin-Gui Wang, Ruqiang Zou, Yanli Zhao	Small	2016	(C126 H66 Co3 N6 O47 Zn8)n	catena-[hexakis(mu-10-(4-carboxylatophenyl)-10H-phenoxazine-3,7-dicarboxylato)-bis(mu-oxo)-triaqua-tri-cobalt-octa-zinc unknown solvate]			I23	197		16.33	293	0.537	0.537	Disordered solvent molecules were not modelled and the disordered density was taken into account using the SQUEEZE/PLATON procedure.	293 K		TEMP: 293 K
MALFUD	J.Lincke, D.Lassig, J.Moellmer, C.Reichenbach, A.Puls, A.Moeller, R.Glaser, G.Kalies, R.Staudt, H.Krautscheid	Microporous and Mesoporous Materials	2011	(C44 H42 Cu4 N12 O11)n,10n(H2 O1)	catena-[(mu-oxo)-bis(mu-hydroxo)-tetrakis(mu-4-(3,5-dimethyl-4H-1,2,4-triazol-4-yl)benzoato)-tetra-copper decahydrate]		blue	P-421c	114	prism	6.49	213	0.98	0.979	O5 and O6,O7,O8 disordered over two sites with occupancies 0.70:0.30.			TEMP: 213 K COLOR: blue "HABIT: prism
MALYIJ	Jiseul Chun, Han Sol Lee, Il Gu Jung, Soon Won Lee, Hae Jin Kim, Seung Uk Son	Organometallics	2010	(C58 H70 Ce1 N4 O8 1+)n,n(N1 O3 1-)	catena-((mu!4$-1,3-bis(4-carboxylato-2,6-diisopropylphenyl)imidazolium)-(mu!2$-1,3-bis(4-carboxylato-2,6-diisopropylphenyl)imidazolium)-cerium(iii) nitrate)		colorless	P21/c	14	block	5	293	0.919	0.919		at 293 K		TEMP: at 293 K COLOR: colorless "HABIT: block
MALYOP	Jiseul Chun, Han Sol Lee, Il Gu Jung, Soon Won Lee, Hae Jin Kim, Seung Uk Son	Organometallics	2010	(C58 H69 Ce1 Cl1 Cu1 N4 O8)n	catena-((mu!4$-1,3-bis(4-carboxylato-2,6-diisopropylphenyl)imidazolium)-(mu!3$-1,3-bis(4-carboxylato-2,6-diisopropylphenyl)imidazol-2-ylidene)-chloro-cerium(iii)-copper)		pale brown	P21/c	14	block	6.66	293	0.927	0.927		at 293 K		TEMP: at 293 K COLOR: pale brown "HABIT: block
MAVRAE	Jingui Duan, Zhen Yang, Junfeng Bai, Baishu Zheng, Yizhi Li, Shuhua Li	Chem.Commun.	2012	(C32 H23 Cu3 N2 O17)n	catena-(bis(mu!6$-5-(4-Carboxylatobenzoylamino)isophthalato)-triaqua-tri-copper unknown solvate)	NJU-Bai3		P63/mmc	194		5.01	291	0.594	0.593	The aqua ligands are disordered. The SQUEEZE/PLATON program was used to model the disordered solvent, which could not be identified.	at 291 K		TEMP: at 291 K
MEGBAD	Xiu-Li Yang, Ming-Hua Xie, Chao Zou, Yabing He, Banglin Chen, M.O.Keeffe, Chuan-De Wu	J.Am.Chem.Soc.	2012	(C52 H36 Cl2 Mn5 N4 Ni1 O24)n	catena-((mu!17$-5,10,15,20-tetrakis(3,5-dicarboxylatophenyl)-porphyrinato)-bis(mu!2$-oxo)-hexa-aqua-dichloro-penta-manganese-nickel unknown solvate)	ZJU-19	brown	Fmmm	69	block	9.8	293	0.92	0.92	The disordered unknown solvent molecules were not modelled and the disordered density was taken into account using the SQUEEZE/PLATON procedure.	at 293 K		TEMP: at 293 K COLOR: brown "HABIT: block
MEHMET	O.K.Farha, C.E.Wilmer, I.Eryazici, B.G.Hauser, P.A.Parilla, K.O'Neill, A.A.Sarjeant, S.T.Nguyen, R.Q.Snurr, J.T.Hupp	J.Am.Chem.Soc.	2012	(C42 H18 Cu3 O15)n	catena-[(mu!12$-1,3,5-tris(4-(3,5-Dicarboxylatophenyl)buta-1,3-diyn-1-yl)benzene)-triaqua-tri-copper(ii) unknown solvate]	NU-111	green	Fm3m	225	prism	8.06	225	0.433	0.431	Disordered solvent molecules were not modelled and the disordered density was taken into account using the MASK/OLEX2 procedure. The unit cell was found to contain a void of 94772 A$3! holding 23810 electrons.			TEMP: at 225.0 K COLOR: green "HABIT: prism
MIBMER	M.Dan-Hardi, H.Chevreau, T.Devic, P.Horcajada, G.Maurin, G.Ferey, D.Popov, C.Riekel, S.Wuttke, J.-C.Lavalley, A.Vimont, T.Boudewijns, Dirk de Vos, C.Serre	Chem.Mater.	2012	(C42 H29 Fe3 O16)n	catena-(tris(mu!4$-biphenyl-4,4'-dicarboxylato)-(mu!3$-oxo)-hydroxy-diaqua-tri-iron(iii) unknown solvate)	MIL-126	orange	P43212	96	needle	10.17	100	0.756	0.752	The solvent molecules were not modelled.	synchrotron radiation		TEMP: at 100 K RADIATION: synchrotron radiation
MIBQAR	Nina Lock, Yue Wu, M.Christensen, L.J.Cameron, V.K.Peterson, A.J.Bridgeman, C.J.Kepert, Bo B.Iversen	J.Phys.Chem.C	2010	(C24 H12 O13 Zn4)n	catena-(tris(mu!4$-Terephthalato)-(mu!4$-oxo)-tetra-zinc)	MOF-5	colorless	Fm-3m	225	cube	4.88	100	0.589	0.589			We calaculate 79% voids in this guest free crystal	TEMP: 100 K COLOR: colorless "HABIT: cube
MIBQAR01	Nina Lock, Yue Wu, M.Christensen, L.J.Cameron, V.K.Peterson, A.J.Bridgeman, C.J.Kepert, Bo B.Iversen	J.Phys.Chem.C	2010	(C24 H12 O13 Zn4)n	catena-(tris(mu!4$-Terephthalato)-(mu!4$-oxo)-tetra-zinc)	MOF-5	colorless	Fm-3m	225	cube	4.05	120	0.59	0.59			We calaculate 79% voids in this guest free crystal	TEMP: 120 K COLOR: colorless "HABIT: cube
MIBQAR02	Nina Lock, Yue Wu, M.Christensen, L.J.Cameron, V.K.Peterson, A.J.Bridgeman, C.J.Kepert, Bo B.Iversen	J.Phys.Chem.C	2010	(C24 H12 O13 Zn4)n	catena-(tris(mu!4$-Terephthalato)-(mu!4$-oxo)-tetra-zinc)	MOF-5	colorless	Fm-3m	225	cube	3.61	140	0.59	0.59			We calaculate 79% voids in this guest free crystal	TEMP: 140 K COLOR: colorless "HABIT: cube
MIBQAR03	Nina Lock, Yue Wu, M.Christensen, L.J.Cameron, V.K.Peterson, A.J.Bridgeman, C.J.Kepert, Bo B.Iversen	J.Phys.Chem.C	2010	(C24 H12 O13 Zn4)n	catena-(tris(mu!4$-Terephthalato)-(mu!4$-oxo)-tetra-zinc)	MOF-5	colorless	Fm-3m	225	cube	3.3	160	0.591	0.591			We calaculate 79% voids in this guest free crystal	TEMP: 160 K COLOR: colorless "HABIT: cube
MIBQAR04	Nina Lock, Yue Wu, M.Christensen, L.J.Cameron, V.K.Peterson, A.J.Bridgeman, C.J.Kepert, Bo B.Iversen	J.Phys.Chem.C	2010	(C24 H12 O13 Zn4)n	catena-(tris(mu!4$-Terephthalato)-(mu!4$-oxo)-tetra-zinc)	MOF-5	colorless	Fm-3m	225	cube	2.97	180	0.591	0.591			We calaculate 79% voids in this guest free crystal	TEMP: 180 K COLOR: colorless "HABIT: cube
MIBQAR05	Nina Lock, Yue Wu, M.Christensen, L.J.Cameron, V.K.Peterson, A.J.Bridgeman, C.J.Kepert, Bo B.Iversen	J.Phys.Chem.C	2010	(C24 H12 O13 Zn4)n	catena-(tris(mu!4$-Terephthalato)-(mu!4$-oxo)-tetra-zinc)	MOF-5	colorless	Fm-3m	225	cube	3.14	200	0.592	0.592			We calaculate 79% voids in this guest free crystal	TEMP: 200 K COLOR: colorless "HABIT: cube
MIBQAR06	Nina Lock, Yue Wu, M.Christensen, L.J.Cameron, V.K.Peterson, A.J.Bridgeman, C.J.Kepert, Bo B.Iversen	J.Phys.Chem.C	2010	(C24 H12 O13 Zn4)n	catena-(tris(mu!4$-Terephthalato)-(mu!4$-oxo)-tetra-zinc)	MOF-5	colorless	Fm-3m	225	cube	2.97	220	0.592	0.592			We calaculate 79% voids in this guest free crystal	TEMP: 220 K COLOR: colorless "HABIT: cube
MIBQAR07	Nina Lock, Yue Wu, M.Christensen, L.J.Cameron, V.K.Peterson, A.J.Bridgeman, C.J.Kepert, Bo B.Iversen	J.Phys.Chem.C	2010	(C24 H12 O13 Zn4)n	catena-(tris(mu!4$-Terephthalato)-(mu!4$-oxo)-tetra-zinc)	MOF-5	colorless	Fm-3m	225	cube	3.11	240	0.593	0.593			We calaculate 79% voids in this guest free crystal	TEMP: 240 K COLOR: colorless "HABIT: cube
MIBQAR08	Nina Lock, Yue Wu, M.Christensen, L.J.Cameron, V.K.Peterson, A.J.Bridgeman, C.J.Kepert, Bo B.Iversen	J.Phys.Chem.C	2010	(C24 H12 O13 Zn4)n	catena-(tris(mu!4$-Terephthalato)-(mu!4$-oxo)-tetra-zinc)	MOF-5	colorless	Fm-3m	225	cube	3.34	260	0.593	0.593			We calaculate 79% voids in this guest free crystal	TEMP: 260 K COLOR: colorless "HABIT: cube
MIBQAR09	Nina Lock, Yue Wu, M.Christensen, L.J.Cameron, V.K.Peterson, A.J.Bridgeman, C.J.Kepert, Bo B.Iversen	J.Phys.Chem.C	2010	(C24 H12 O13 Zn4)n	catena-(tris(mu!4$-Terephthalato)-(mu!4$-oxo)-tetra-zinc)	MOF-5	colorless	Fm-3m	225	cube	3.15	280	0.594	0.594			We calaculate 79% voids in this guest free crystal	TEMP: 280 K COLOR: colorless "HABIT: cube
MIBQAR10	Nina Lock, Yue Wu, M.Christensen, L.J.Cameron, V.K.Peterson, A.J.Bridgeman, C.J.Kepert, Bo B.Iversen	J.Phys.Chem.C	2010	(C24 H12 O13 Zn4)n	catena-(tris(mu!4$-Terephthalato)-(mu!4$-oxo)-tetra-zinc)	MOF-5	colorless	Fm-3m	225	cube	3.14	300	0.594	0.594		300 K	We calaculate 79% voids in this guest free crystal	TEMP: 300 K COLOR: colorless "HABIT: cube
MIBQAR11	Nina Lock, Yue Wu, M.Christensen, L.J.Cameron, V.K.Peterson, A.J.Bridgeman, C.J.Kepert, Bo B.Iversen	J.Phys.Chem.C	2010	(C24 H12 O13 Zn4)n	catena-(tris(mu!4$-Terephthalato)-(mu!4$-oxo)-tetra-zinc)	MOF-5	colorless	Fm-3m	225	cube	3.13	320	0.595	0.595			We calaculate 79% voids in this guest free crystal	TEMP: 320 K COLOR: colorless "HABIT: cube
MIBQAR12	Nina Lock, Yue Wu, M.Christensen, L.J.Cameron, V.K.Peterson, A.J.Bridgeman, C.J.Kepert, Bo B.Iversen	J.Phys.Chem.C	2010	(C24 H12 O13 Zn4)n	catena-(tris(mu!4$-Terephthalato)-(mu!4$-oxo)-tetra-zinc)	MOF-5	colorless	Fm-3m	225	cube	3.13	340	0.595	0.595			We calaculate 79% voids in this guest free crystal	TEMP: 340 K COLOR: colorless "HABIT: cube
MIBQAR13	Nina Lock, Yue Wu, M.Christensen, L.J.Cameron, V.K.Peterson, A.J.Bridgeman, C.J.Kepert, Bo B.Iversen	J.Phys.Chem.C	2010	(C24 H12 O13 Zn4)n	catena-(tris(mu!4$-Terephthalato)-(mu!4$-oxo)-tetra-zinc)	MOF-5	colorless	Fm-3m	225	cube	3.26	360	0.596	0.596			We calaculate 79% voids in this guest free crystal	TEMP: 360 K COLOR: colorless "HABIT: cube
MIBQAR14	Nina Lock, Yue Wu, M.Christensen, L.J.Cameron, V.K.Peterson, A.J.Bridgeman, C.J.Kepert, Bo B.Iversen	J.Phys.Chem.C	2010	(C24 H12 O13 Zn4)n	catena-(tris(mu!4$-Terephthalato)-(mu!4$-oxo)-tetra-zinc)	MOF-5	colorless	Fm-3m	225	cube	3.21	380	0.596	0.596			We calaculate 79% voids in this guest free crystal	TEMP: 380 K COLOR: colorless "HABIT: cube
MIBQAR15	Nina Lock, Yue Wu, M.Christensen, L.J.Cameron, V.K.Peterson, A.J.Bridgeman, C.J.Kepert, Bo B.Iversen	J.Phys.Chem.C	2010	(C24 H12 O13 Zn4)n	catena-(tris(mu!4$-Terephthalato)-(mu!4$-oxo)-tetra-zinc)	MOF-5	colorless	Fm-3m	225	cube	3.09	400	0.596	0.596			We calaculate 79% voids in this guest free crystal	TEMP: 400 K COLOR: colorless "HABIT: cube
MIBQAR16	Nina Lock, Yue Wu, M.Christensen, L.J.Cameron, V.K.Peterson, A.J.Bridgeman, C.J.Kepert, Bo B.Iversen	J.Phys.Chem.C	2010	(C24 H12 O13 Zn4)n	catena-(tris(mu!4$-Terephthalato)-(mu!4$-oxo)-tetra-zinc)	MOF-5	colorless	Fm-3m	225	cube	3.6	420	0.597	0.597			We calaculate 79% voids in this guest free crystal	TEMP: 420 K COLOR: colorless "HABIT: cube
MIBQAR17	Nina Lock, Yue Wu, M.Christensen, L.J.Cameron, V.K.Peterson, A.J.Bridgeman, C.J.Kepert, Bo B.Iversen	J.Phys.Chem.C	2010	(C24 H12 O13 Zn4)n	catena-(tris(mu!4$-Terephthalato)-(mu!4$-oxo)-tetra-zinc)	MOF-5	colorless	Fm-3m	225	cube	3.28	440	0.597	0.597			We calaculate 79% voids in this guest free crystal	TEMP: 440 K COLOR: colorless "HABIT: cube
MIBQAR18	Nina Lock, Yue Wu, M.Christensen, L.J.Cameron, V.K.Peterson, A.J.Bridgeman, C.J.Kepert, Bo B.Iversen	J.Phys.Chem.C	2010	(C24 H12 O13 Zn4)n	catena-(tris(mu!4$-Terephthalato)-(mu!4$-oxo)-tetra-zinc)	MOF-5	colorless	Fm-3m	225	cube	6.9	460	0.598	0.598			We calaculate 79% voids in this guest free crystal	TEMP: 460 K COLOR: colorless "HABIT: cube
MIBQAR19	Nina Lock, Yue Wu, M.Christensen, L.J.Cameron, V.K.Peterson, A.J.Bridgeman, C.J.Kepert, Bo B.Iversen	J.Phys.Chem.C	2010	(C24 H12 O13 Zn4)n	catena-(tris(mu!4$-Terephthalato)-(mu!4$-oxo)-tetra-zinc)	MOF-5	colorless	Fm-3m	225	cube	3.1	480	0.599	0.599			We calculate 79% voids in this guest free crystal	TEMP: 480 K COLOR: colorless "HABIT: cube
MIBQAR20	Nina Lock, Yue Wu, M.Christensen, L.J.Cameron, V.K.Peterson, A.J.Bridgeman, C.J.Kepert, Bo B.Iversen	J.Phys.Chem.C	2010	(C24 H12 O13 Zn4)n	catena-(tris(mu!4$-Terephthalato)-(mu!4$-oxo)-tetra-zinc)	MOF-5	colorless	Fm-3m	225	cube	3.46	500	0.599	0.599			We calaculate 79% voids in this guest free crystal	TEMP: 500 K COLOR: colorless "HABIT: cube
MIDCAF	Lei Han, Lan Qin, Lan-Ping Xu, Wen-Na Zhao	Inorg.Chem.	2013	(C48 H28 N6 O14 Zn3)n	catena(bis(mu!6$-4,4',4''-(1,3,5-Triazine-2,4,6-triyl)tribenzoato)-diaqua-tri-zinc)		colorless	P42212	94	block	8.52	298	0.882	0.882		at 298 K	We calculate 53.89% void space in the structure which agrees with information in the paper. The large chiral channels act as scaffolds for the inclusion of N,N-dimethylaniline molecules by donor-acceptor interactions. Details of guest molecules are not deposited	TEMP: at 298 K COLOR: colorless "HABIT: block
MIDTEA	Quan-Guo Zhai, Qipu Lin, Tao Wu, Le Wang, Shou-Tian Zheng, Xianhui Bu, Pingyun Feng	Chem.Mater.	2012	(C2 H8 N1 1+)n,n(C26 H16 N5 O12 Zn3 1-)	catena-[Dimethylammonium bis(mu!4$-terephthalato)-(mu!3$-3,5-diamino-1,2,4-triazolyl)-(mu!2$-terephthalato)-tri-zinc(ii) unknown solvate]	CPF-13	colorless	P42/mnm	136	octahedron	4.68	296	0.832	0	The bidentate terephthlate ligand is disordered by symmetry over two sites with occupancy 0.50; Disordered cation and solvent molecules were not modelled and the disordered density was taken into account using the SQUEEZE/PLATON procedure. The unit cell was found to contain a void of 4359 A$3! holding 1012 electrons.	at 296 K		TEMP: at 296 K COLOR: colorless "HABIT: octahedron
MIKJUN	Guo-Li Zheng, Guo-Cheng Yang, Shu-Yan Song, Xue-Zhi Song, Hong-Jie Zhang	CrystEngComm	2014	(C40 H40 Cu2 N8 O12 4+)n,2n(C28 H21 O16 S4 3-),n(C20 H20 Cu1 N4 O6 2+),16n(H2 O1)	catena-(tetrakis(mu!2$-4,4'-Bipyridine-N,N'-dioxide)-tetra-aqua-di-copper(ii) bis(diaqua-bis(2,2'-bipyridine-N,N'-dioxide)-copper(ii)) bis(hydrogen 25,26,27,28-tetrahydroxycalix(4)arene-5,11,17,23-tetrasulfonate) hexadecahydrate)		red	P-1	2	plate	9.29	193	0.968	0.951	One of the sulfonate moieties is partially disordered.			TEMP: 193 K COLOR: red "HABIT: plate
MILROQ	Zhangwen Wei, Daqiang Yuan, X.Zhao, Daofeng Sun, Hong-Cai Zhou	Sci.China.Chem.	2013	(C154 H138 Cu18 N26 O28)n	catena-(dodecakis(mu!4$-4-(4-Carboxylatophenyl)-3,5-dimethylpyrazolato)-tetra-aqua-bis(pyridine)-octadeca-copper)		green	P42/nmc	137	block	10.84	95	0.611	0.61			The structue contains 70 percent void space, as the authors calculated using PLATON	TEMP: at 95 K COLOR: green "HABIT: block
MIPHEA	L.D.Earl, B.O.Patrick, M.O.Wolf	Inorg.Chem.	2013	(C141 H199 Mn6 N3 O32 S12)n,C3 H7 N1 O1,H2 O1	catena-[hexakis(mu-3,3'-dihexyl-2,2'-bithiophene-5,5'-dicarboxylato)-tris(N,N-dimethylformamide)-penta-aqua-hexa-manganese N,N-dimethylformamide solvate monohydrate]		colorless	C2221	20	prism	8.86	90	0.833	0.811	The structure is disordered. Disordered solvent molecules were not modelled and the disordered density was taken into account using the SQUEEZE/PLATON procedure.			TEMP: 90 K COLOR: colorless "HABIT: prism
MIXBAY	Pei-Zhou Li, Xiao-Jun Wang, Kang Zhang, A.Nalaparaju, Ruyi Zou, Ruqiang Zou, Jianwen Jiang, Yanli Zhao	Chem.Commun.	2014	(C26 H16 Cu2 N6 O10)n	catena-[(mu!8$-5,5'-(1,4-phenylenebis(1H-1,2,3-triazole-4,1-diyl))diisophthalato)-diaqua-di-copper unknown solvate]		blue	P321	150	plate	7.73	296	0.675	0.675	Disordered solvent molecules were not modelled and the disordered density was taken into account using the SQUEEZE/PLATON procedure.	296 K	We calculate 68.06% void space in the structure	TEMP: 296 K COLOR: blue "HABIT: plate
MIXBEC	Pei-Zhou Li, Xiao-Jun Wang, Kang Zhang, A.Nalaparaju, Ruyi Zou, Ruqiang Zou, Jianwen Jiang, Yanli Zhao	Chem.Commun.	2014	(C26 H14 Cu2 N6 O10)n	catena-[(mu!8$-5,5'-(1,3-phenylenebis(1H-1,2,3-triazole-4,1-diyl))diisophthalato)-bis(hydroxy)-di-copper unknown solvate]		blue	Fmmm	69	block	5.52	293	0.676	0.676	Disordered solvent molecules were not modelled and the disordered density was taken into account using the SQUEEZE/PLATON procedure.	293 K	We calculate 70.26% void space in the structure	TEMP: 293 K COLOR: blue "HABIT: block
MIXBIG	Pei-Zhou Li, Xiao-Jun Wang, Kang Zhang, A.Nalaparaju, Ruyi Zou, Ruqiang Zou, Jianwen Jiang, Yanli Zhao	Chem.Commun.	2014	(C108 H66 Cu12 N18 O60)n	catena-[hexakis(mu!8$-5,5'-(1H-1,2,3-triazole-1,4-diyl)diisophthalato)-dodecakis(aqua)-dodeca-copper unknown solvate]		blue	C2/m	12	block	7.27	293	0.772	0.757	The structure is disordered. Disordered solvent molecules were not modelled and the disordered density was taken into account using the SQUEEZE/PLATON procedure.	293 K	The identity of the terminal coordination site on the copper is unclear. It has been modelled as hydroxy or oxo, we have made this water to charge balance the structure	TEMP: 293 K COLOR: blue "HABIT: block
MIXYID	Seok Jeong, Dongwook Kim, Xiaokai Song, Min Choi, Noejung Park, Myoung Soo Lah	Chem.Mater.	2013	(C102 H84 N12 Ni6 O36)n	catena-[bis(mu!3$-Hydrogen benzene-1,3,5-tricarboxylato-O,O':O'',O''':O'''',O''''')-tetrakis(mu!3$-hydrogen benzene-1,3,5-tricarboxylato-O:O'':O'''')-bis(mu!2$-4,4'-bipyridine)-bis(mu!2$-1,4-diazabicyclo[2.2.2]octane)-hexa-nickel(ii) unknown solvate]		pale green	P3	143	plate	9.45	173	0.916	0.916	The SQUEEZE/PLATON program has been used to model some disorder. The unit cell was found to contain a void of 2219 A$3! holding 96 electrons.		The H atoms of the tricarboxylate ligands, required for charge balance, have not been located and have been placed arbitrarily in the 2D diagram	TEMP: at 173 K COLOR: pale green "HABIT: plate
MIXYOJ	Seok Jeong, Dongwook Kim, Xiaokai Song, Min Choi, Noejung Park, Myoung Soo Lah	Chem.Mater.	2013	(C102 H84 N12 Ni6 O36)n	catena-[bis(mu!3$-Hydrogen benzene-1,3,5-tricarboxylato-O,O':O'',O''':O'''',O''''')-tetrakis(mu!3$-hydrogen benzene-1,3,5-tricarboxylato-O:O'':O'''')-tris(mu!2$-4,4'-bipyridine)-tris(mu!2$-1,4-diazabicyclo[2.2.2]octane)-hexa-nickel unknown solvate]		pale green	P3	143	block	11.72	173	0.925	0	One of the two independent bridging 4, 4'-bipyridine:dabco ligands are disordered with mixed occupancy over the same site. The ligands have been modelled with occupancy 0.4:0.6. The sum formula is C95 H95 N12 Ni6 O38. Disordered solvent molecules were not modelled and the disordered density was taken into account using the SQUEEZE/PLATON procedure. The unit cell was found to contain a void of 209…		The tricarboxylate ligands require additional H atoms for charge balance. These have not been located from the diffraction data and have been placed arbitrarily in the 2D diagram	TEMP: at 173 K COLOR: pale green "HABIT: block
MIXZOK	Jia Jiangtao, Wang Lei, Zhao Qing, Sun Fuxing, Zhu Guangshan	Huaxue Xuebao(Chin.)(Acta Chim.Sinica)	2013	(C66 H43 Ni3 O16 1-)n,C2 H8 N1 1+,10(C4 H9 N1 O1),7(H2 O1)	catena-(dimethylammonium (mu-1,3,5-tris(3,5-bis(4-carboxyphenyl)phenyl)benzene)-(mu-hydroxo)-triaqua-tri-nickel N,N-dimethylacetamide solvate heptahydrate)	JUC-105	pale green	P-62c	190	polyhedra	10.3	296	0.863	0	Disordered cations and solvent molecules were not modelled and the disordered density was taken into account using the SQUEEZE/PLATON procedure.	at 296 K		TEMP: at 296 K COLOR: pale green "HABIT: polyhedra
MIZPUI	R.D.Kennedy, V.Krungleviciute, D.J.Clingerman, J.E.Mondloch, Yang Peng, C.E.Wilmer, A.A.Sarjeant, R.Q.Snurr, J.T.Hupp, T.Yildirim, O.K.Farha, C.A.Mirkin	Chem.Mater.	2013	(C18 H20 B10 Cu2 O10)n	catena-((mu!8$-1,12-bis(3,5-Dicarboxylatophenyl)-1,12-dicarba-closo-dodecaborane)-aqua-di-copper unknown solvate)		blue	R-3m	166	prism	11.73	100	0.797	0.797	The MASK/OLEX2 program has been used to model some disorder.			TEMP: at 100.0 K COLOR: blue "HABIT: prism "SOURCE-CHEM: dimethylformamide/water
MOBBAI	Seok Jeong, Dongwook Kim, Sunyoung Shin, Dohyun Moon, Sung June Cho, Myoung Soo Lah	Chem.Mater.	2014	(C19 H12 N2 Ni1 O6)n	catena-[(mu!3$-Hydrogen benzene-1,3,5-tricarboxylato)-(mu!2$-4,4'-bipyridine)-nickel unknown solvate]		pale green	P63/mmc	194	plate	17.15	100	0.814	0.814	C2N,C3N,C5N,C6N disordered over one sites with occupancies 0.17; C4,O3 disordered by symmetry over two configurations with occupancy 0.25; The SQUEEZE/PLATON program has been used to model some disorder.	synchrotron		TEMP: 100 K RADIATION: synchrotron
MODDEQ	Zhong-Min Su, Shu-Ran Zhang, dong-ying du, Wen-Wen He, Ya-Qian Lan, Ping Shen	Chem.-Eur.J.	2014	(C48 H38 Cd2 Cl1 N7 O7)n	catena-[(mu!4$-4,4',4''-(nitrilotris(methylene-1H-benzimidazole-2,1-diylmethylene))tribenzoato)-aqua-chloro-di-cadmium unknown solvate]		white	C2/c	15	needle	4.18	293	0.875	0.873	The SQUEEZE/PLATON program has been used to model some disorder.	at 293 K		TEMP: at 293 K COLOR: white "HABIT: needle
MOKVOZ	Xing Duan, Jianfeng Cai, Jiancan Yu, Chuande Wu, Yuanjing Cui, Yu Yang, Guodong Qian	Microporous and Mesoporous Materials	2013	(C30 H18 Cu2 O10)n	catena-[(mu!8$-5,5'-anthracene-2,6-diyldibenzene-1,3-dicarboxylato)-diaqua-di-copper unknown solvate]		green	R-3m	166	block	13.72	293	0.65	0.65	C10,C11,C12,C7,C8,C9 disordered by symmetry over two configurations with occupancy 0.50; The SQUEEZE/PLATON program has been used to model some disorder.	at 293 K		TEMP: at 293 K COLOR: green "HABIT: block
MONXIY	V.Venkatesh, P.Pachfule, R.Banerjee, S.Verma	Chem.-Eur.J.	2014	(C24 H30 Cl1 Cu4 N15 S3)n	catena-[tris(mu!4$-6-amino-9-propyl-9H-purine-8-thiolato)-chloro-tetra-copper]		yellow	F-43c	219	block	8.88	100	0.852	0.852			We calculate 62.49% void space in the structure	TEMP: at 100 K COLOR: yellow "HABIT: block
MOQXOH	J.M.Cole, P.G.Waddell, A.E.H.Wheatley, G.J.McIntyre, A.J.Peel, C.W.Tate, D.J.Linton	Organometallics	2014	(C12 H27 Al1 Li1 N1)n	catena-[bis(mu-methyl)-pivalonitrile-t-butyl-aluminium-lithium]		colorless	Pna21	33	block	4.69	180	0.894	0.894				TEMP: at 180 K COLOR: colorless "HABIT: block
MOQXOH01	J.M.Cole, P.G.Waddell, A.E.H.Wheatley, G.J.McIntyre, A.J.Peel, C.W.Tate, D.J.Linton	Organometallics	2014	(C12 H27 Al1 Li1 N1)n	catena-(tris(mu-methylene)-t-butyl-(pivalonitrile)-lithium-aluminium)		colorless	Pna21	33	block	5.27	20	0.894	0.893		neutron		TEMP: 20 K RADIATION: neutron
MOXJOZ	Jian Zhang, Tao Wu, Cong Zhou, Shumei Chen, Pingyun Feng, Xianhui Bu	Angew.Chem.,Int.Ed.	2009	(C16 H20 B1 Cu1 N8)n	catena-[(mu!4$-tetrakis(2-Methyl-1H-imidazol-1-yl)borate-N$3!,N$3'!,N$3''!,N$3'''!)-copper(i) unknown solvate]	BIF-3-Cu	colorless	P-43n	218		6.05	293	0.967	0.967	No details on the solvent present, its stoichiometry or how the solvent was modelled is given in the paper or deposited cif. We calculate the structure contains 23% void space.	at 293 K	The structure has a neutral sodalite (SOD) framework topology	TEMP: at 293 K COLOR: colorless "ISO: Isostructural with the lithium(i) analogue
MOXPIZ	P.E.Ryan, C.Lescop, D.Laliberte, T.Hamilton, T.Maris, J.D.Wuest	Inorg.Chem.	2009	(C98 H88 Cu2 N8 O12 4+)n,4n(N1 O3 1-),4n(C3 H7 N1 O1),12n(H2 O1)	catena-(bis(mu!4$-tetrakis((4-(Pyridin-4-yl)phenoxy)methyl)methane)-tetra-aqua-di-copper(ii) tetranitrate dimethylformamide unknown solvate dodecahydrate unknown clathrate)		colorless	Pban	50	block	6.45	223	0.835	0.835	Disordered solvent molecules were not modelled and the disordered density was taken into account using the SQUEEZE/PLATON procedure. The solvent is unspecified but 608 electrons per unit cell were located in the void.		The authors report that the crystal has an approximate composition of that given in the paper, but also includes an undetermined amount of disordered unspecified guests, which have not been identified or modelled. The authors report that the density was calculated with no solvent included	TEMP: at 223 K COLOR: colorless "HABIT: block "SOURCE-CHEM: dmf/water
MOXPUL	P.E.Ryan, C.Lescop, D.Laliberte, T.Hamilton, T.Maris, J.D.Wuest	Inorg.Chem.	2009	(C69 H72 Cu4 N4 O20)n	catena-((mu!4$-tetrakis((3-Methyl-4-(4-pyridinyl)phenoxy)-methyl)methane)-octakis(mu!2$-acetato)-tetra-copper(ii) unknown solvate)		colorless	P42/n	86	block	6.16	223	0.745	0.744	Disordered solvent molecules were not modelled and the disordered density was taken into account using the SQUEEZE/PLATON procedure. The solvent is unspecified but 1041 electrons per unit cell were located in the void. A 3-methylphenoxy moiety is disordered over two sites with occupancies of 0.503:0.497.		The authors report that the crystal has an approximate composition of that given in the paper, but also includes an undetermined amount of disordered unspecified guests, which have not been identified or modelled. The authors report that the density is calculated with no solvent included	TEMP: at 223 K COLOR: colorless "HABIT: block "SOURCE-CHEM: ethanol/methanol
MOYYOP	P.M.Barron, Hyun-Tak Son, Chunhua Hu, Wonyoung Choe	Cryst.Growth Des.	2009	(C68 H40 Mn1 N8 O8 Zn2 1+)n,n(N1 O3 1-)	catena-((mu!9$-5,10,15,20-tetrakis(4-carboxylatophenyl)porphyrinato)-bis(mu!2$-4,4'-bipyridine)-manganese(iii)-di-zinc nitrate unknown solvate)		red	I4/mmm	139	plate	8.11	120	0.626	0.626	The 4,4'-bipyridine ligand is extensively disordered by symmetry. The SQUEEZE/PLATON program has been used to model the disordered solvent.			TEMP: at 120 K COLOR: red "HABIT: plate
MOYYUV	P.M.Barron, Hyun-Tak Son, Chunhua Hu, Wonyoung Choe	Cryst.Growth Des.	2009	(C68 H40 Co2 Mn1 N8 O8 1+)n,n(N1 O3 1-)	catena-((mu!9$-5,10,15,20-tetrakis(4-carboxylatophenyl)porphyrinato)-bis(mu!2$-4,4'-bipyridine)-di-cobalt-manganese(iii) nitrate unknown solvate)		dark red	I4/mmm	139	plate	9.67	100	0.624	0.624	The 4,4'-bipyridine ligand is extensively disordered by symmetry. The SQUEEZE/PLATON program has been used to model the disordered solvent.			TEMP: at 100 K COLOR: dark red "HABIT: plate
MOYZAC	P.M.Barron, Hyun-Tak Son, Chunhua Hu, Wonyoung Choe	Cryst.Growth Des.	2009	(C68 H40 Fe1 N8 O8 Zn2 1+)n,n(N1 O3 1-)	catena-((mu!9$-5,10,15,20-tetrakis(4-carboxylatophenyl)porphyrinato)-bis(mu!2$-4,4'-bipyridine)-iron(iii)-di-zinc nitrate unknown solvate)		dark purple	I4/mmm	139	plate	5.94	120	0.644	0.644	The 4,4'-bipyridine ligand is extensively disordered by symmetry. The SQUEEZE/PLATON program has been used to model the disordered solvent.			TEMP: at 120 K COLOR: dark purple "HABIT: plate
MOYZEG	P.M.Barron, Hyun-Tak Son, Chunhua Hu, Wonyoung Choe	Cryst.Growth Des.	2009	(C68 H40 Co2 Fe1 N8 O8 1+)n,n(N1 O3 1-)	catena-((mu!9$-5,10,15,20-tetrakis(4-carboxylatophenyl)porphyrinato)-bis(mu!2$-4,4'-bipyridine)-di-cobalt-iron(iii) nitrate unknown solvate)		dark purple	I4/mmm	139	plate	6.27	120	0.645	0.645	The 4,4'-bipyridine ligand is extensively disordered by symmetry. The SQUEEZE/PLATON program has been used to model the disordered solvent.			TEMP: at 120 K COLOR: dark purple "HABIT: plate
MOYZIK	P.M.Barron, Hyun-Tak Son, Chunhua Hu, Wonyoung Choe	Cryst.Growth Des.	2009	(C58 H32 N6 O9 V1 Zn2)n	catena-((mu!9$-5,10,15,20-tetrakis(4-carboxylatophenyl)porphyrinato)-(mu!2$-4,4'-bipyridine)-oxo-vanadium-di-zinc unknown solvate)		red	P4/mmm	123	plate	3.58	297	0.483	0.483	The 4,4'-bipyridine ligand is extensively disordered by symmetry. The V=O unit is also disordered by symmetry. The SQUEEZE/PLATON program has been used to model the disordered solvent.	at 297 K		TEMP: at 297 K COLOR: red "HABIT: plate
MOYZOQ	P.M.Barron, Hyun-Tak Son, Chunhua Hu, Wonyoung Choe	Cryst.Growth Des.	2009	(C58 H32 Co2 N6 O8 Pt1)n	catena-((mu!9$-5,10,15,20-tetrakis(4-carboxylatophenyl)porphyrinato)-(mu!2$-4,4'-bipyridine)-di-cobalt-platinum unknown solvate)		red	P4/mmm	123	plate	1.75	296	0.536	0.536	The 4,4'-bipyridine ligand is extensively disordered by symmetry. The SQUEEZE/PLATON program has been used to model the disordered solvent.	at 296 K		TEMP: at 296 K COLOR: red "HABIT: plate
MOYZUW	P.M.Barron, Hyun-Tak Son, Chunhua Hu, Wonyoung Choe	Cryst.Growth Des.	2009	(C58 H32 N6 Ni1 O8 Zn2)n	catena-((mu!9$-5,10,15,20-tetrakis(4-carboxylatophenyl)porphyrinato)-(mu!2$-4,4'-bipyridine)-nickel-di-zinc unknown solvate)		red	P4/mmm	123	plate	3.08	296	0.482	0.482	The 4,4'-bipyridine ligand is extensively disordered by symmetry. The SQUEEZE/PLATON program has been used to model the disordered solvent.	at 296 K		TEMP: at 296 K COLOR: red "HABIT: plate
MUBZOA	S.B.Kalidindi, S.Nayak, M.E.Briggs, S.Jansat, A.P.Katsoulidis, G.J.Miller, J.E.Warren, D.Antypov, F.Cora, B.Slater, M.R.Prestly, C.Marti-Gastaldo, M.J.Rosseinsky	Angew.Chem.,Int.Ed.	2015	(C144 H70 O32 Zr6)n,4n(H2 O1)	catena-[tris(mu-4,4',4'',4'''-([1,1'-biphenyl]-3,3',5,5' tetrayltetrakis(ethyne-2,1 diyl))tetrabenzoato)-tetrakis(mu-hydroxo)-tetrakis(mu-oxo)-hexa-zirconium unknown solvate tetrahydrate]		colorless	R-3r	148	cube	5.52	250	0.453	0.451	The structure is disordered; Disordered solvent molecules were not modelled and the disordered density was taken into account using the SQUEEZE/PLATON procedure.		The hydroxide H atoms have not been located and have been placed arbitrarily in the 2D diagram	TEMP: at 250 K COLOR: colorless "HABIT: cube
MUBZUG	S.B.Kalidindi, S.Nayak, M.E.Briggs, S.Jansat, A.P.Katsoulidis, G.J.Miller, J.E.Warren, D.Antypov, F.Cora, B.Slater, M.R.Prestly, C.Marti-Gastaldo, M.J.Rosseinsky	Angew.Chem.,Int.Ed.	2015	(C156 H70 O32 Zr6)n,4n(H2 O1)	catena-[tris(mu-4,4',4'',4'''-(pyrene-1,3,6,8-tetrayltetraethyne-2,1-diyl)tetrabenzoato)-tetrakis(mu-hydroxo)-tetrakis(mu-oxo)-hexa-zirconium unknown solvate tetrahydrate]		colorless	R-3r	148	cube	5.09	250	0.481	0.479	The structure is disordered; Disordered solvent molecules were not modelled and the disordered density was taken into account using the MASK/OLEX2 procedure.		The hydroxide H atoms have not been located and have been placed arbitrarily in the 2D diagram	TEMP: at 250 K COLOR: colorless "HABIT: cube
MUCLOM	Jian Zhang, Tao Wu, Cong Zhou, Shumei Chen, Pingyun Feng, Xianhui Bu	Angew.Chem.,Int.Ed.	2009	(C16 H20 B1 Li1 N8)n	catena-[(mu!4$-tetrakis(2-Methyl-1H-imidazol-1-yl)borate-N$3!,N$3'!,N$3''!,N$3'''!)-lithium(i) unknown solvate]	BIF-3-Li	colorless	P-43n	218		3.38	293	0.827	0.827	No details on the solvent present, its stoichiometry or how the solvent was modelled is given in the paper or deposited cif. We calculate the structure contains 23% void space.	at 293 K	The structure has a neutral sodalite (SOD) framework topology	TEMP: at 293 K COLOR: colorless "ISO: Isostructural with the copper(i) analogue
MUDTAH	Seunghee Hong, Minhak Oh, Mira Park, Ji Woong Yoon, Jong-San Chang, Myoung Soo Lah	Chem.Commun.	2009	(C36 H18 O15 Zn3)n,n(C3 H7 N1 O1),n(H2 O1)	catena-((mu!12$-1,3,5-tris((3,5-Dicarboxylatophenyl)ethynyl)benzene)-triaqua-tri-zinc(ii) N,N-dimethylformamide solvate monohydrate)	PMOF-2(Zn)	pale brown	Fm-3m	225	block	6.53	100	0.66	0	The SQUEEZE/PLATON program has been used to model the DMF solvent molecules and uncoordinated water molecules.	synchrotron radiation	The total number of DMF solvent molecules and uncoordinated water molecules is unclear	TEMP: at 100 K RADIATION: synchrotron radiation
MUKQUG	Tifeng Xia, Jianfeng Cai, Huizhen Wang, Xing Duan, Yuanjing Cui, Yu Yang, Guodong Qian	Microporous and Mesoporous Materials	2015	(C24 H18 Cu2 O10)n,x(C2 H3 N1),x(C3 H7 N1 O1),x(H2 O1)	catena-[(mu-2',5'-dimethyl-1,1':4',1''-terphenyl-3,3'',5,5''-tetracarboxylato)-diaqua-di-copper acetonitrile N,N-dimethylformamide solvate hydrate]		blue	R-3m	166	block	3.69	296	0.939	0	C2,C3C,C4B disordered by symmetry over two configurations with occupancy 0.5; Disordered acetonitrile, N,N-dimethylformamide and water solvent molecules were not modelled and the disordered density was taken into account using the SQUEEZE/PLATON procedure.	296 K		TEMP: 296 K COLOR: blue "HABIT: block
MUKRAN	Tifeng Xia, Jianfeng Cai, Huizhen Wang, Xing Duan, Yuanjing Cui, Yu Yang, Guodong Qian	Microporous and Mesoporous Materials	2015	(C24 H18 Cu2 O12)n,x(C2 H3 N1),x(C3 H7 N1 O1),x(H2 O1)	catena-[(mu-2',5'-dimethoxy-1,1':4',1''-terphenyl-3,3'',5,5''-tetracarboxylato)-diaqua-di-copper acetonitrile N,N-dimethylformamide solvate hydrate]		blue	R-3m	166	block	5.34	293	0.98	0	C10,C3B,C7,O4B disordered by symmetry over two configurations with occupancy 0.5; Disordered acetonitrile, N,N-dimethylformamide and water solvent molecules were not modelled and the disordered density was taken into account using the SQUEEZE/PLATON procedure.	293 K		TEMP: 293 K COLOR: blue "HABIT: block
MUZKAV	D.Alezi, Y.Belmabkhout, M.Suyetin, P.M.Bhatt, L.J.Weselinski, V.Solovyeva, K.Adil, I.Spanopoulos, P.N.Trikalitis, A.-H.Emwas, M.Eddaoudi	J.Am.Chem.Soc.	2015	(C150 H96 Al6 O32 2+)n,2n(Cl1 1-)	catena-[tris(mu-5',5''-naphthalene-1,4-diylbis(1,1':3',1''-terphenyl-4,4''-dicarboxylato))-bis(mu-oxo)-hexaaqua-hexa-aluminium dichloride]		yellow	Pm-3n	223	cube	14.98	250	0.385	0.384	The structure is disordered by symmetry.	synchrotron	We calculate 75.84% void space in the structure	TEMP: 250 K RADIATION: synchrotron
MUZKEZ	D.Alezi, Y.Belmabkhout, M.Suyetin, P.M.Bhatt, L.J.Weselinski, V.Solovyeva, K.Adil, I.Spanopoulos, P.N.Trikalitis, A.-H.Emwas, M.Eddaoudi	J.Am.Chem.Soc.	2015	(C138 H90 Al6 O32 2+)n,2n(Cl1 1-)	catena-[tris(mu-1,4-bis(4,4''-dicarboxylato-1,1':3',1''-terphenyl-5'-yl)benzene)-bis(mu-oxo)-hexaaqua-hexa-aluminium dichloride]		yellow	Pm-3n	223	cube	14.94	250	0.357	0	The structure is disordered.		We calculate 78.59% void space in the structure	TEMP: 250 K COLOR: yellow "HABIT: cube
NABVAQ	Dashu Chen, Hongzhu Xing, Chungang Wang, Zhongmin Su	J.Mater.Chem.A	2016	(C192 H100 O32 Zr6)n,6n(C3 H7 N1 O1)	catena-[hexakis(mu-4,4'-(anthracene-9,10-diylbis(ethyne-2,1-diyl))dibenzoato)-tetrakis(mu-hydroxo)-tetrakis(mu-oxo)-hexa-zirconium N,N-dimethylformamide solvate]	NNU-28	orange	R-3m	166	cubic	4.88	293	0.818	0	Disordered N,N-dimethylformamide solvent molecules were not modelled and the disordered density was taken into account using the SQUEEZE/PLATON procedure.	293 K	The hydroxide H atoms have not been located and have been placed arbitrarily in the 2D diagram	TEMP: 293 K COLOR: orange "HABIT: cubic
NACVUL	A.Ferguson, Lujia Liu, S.J.Tapperwijn, D.Perl, F.-X.Coudert, S.Van Cleuvenbergen, T.Verbiest, M.A.van der Veen, S.G.Telfer	Nature Chemistry	2016	(C84 H48 N6 O13 Zn4)n,0.39n(C84 H48 N6 O13 Zn4)	catena-[(mu!4$-Oxo)-tris(mu!4$-rac-6,7-diphenyldibenzo[e,g][1,4]diazocine-3,10-dicarboxylato)-tetra-zinc(ii) unknown solvate]	PIP39-MUF-9	yellow	P-43m	215	block	13.31	292	0.731	0.728	The structure is extensively disordered, with the diazocine ligand having randomly arranged enantiomers. The framework is partially interpenetrated (i.e. the second sub-lattice is partially occupied with a ratio 1:0.39). The authors state no attempts were made to model or correct for the solvent in the framework pores. We calculate 15% void space in the structure.	crystal a; 292 K		TEMP: 292 K OTHER-EXP: partially interpenetrated MUF-9 framework formed by reaction in 5% N,N-dimethylformamide in N,N-dibutylformamide "OTHER-DIFF: crystal a
NACVUL01	A.Ferguson, Lujia Liu, S.J.Tapperwijn, D.Perl, F.-X.Coudert, S.Van Cleuvenbergen, T.Verbiest, M.A.van der Veen, S.G.Telfer	Nature Chemistry	2016	(C84 H48 N6 O13 Zn4)n,0.11n(C84 H48 N6 O13 Zn4)	catena-[(mu!4$-Oxo)-tris(mu!4$-rac-6,7-diphenyldibenzo[e,g][1,4]diazocine-3,10-dicarboxylato)-tetra-zinc(ii) unknown solvate]	PIP11-MUF-9	yellow	P-43m	215	block	16.56	292	0.584	0.583	The diazocine ligand is disordered with randomly arranged enantiomers and by symmetry. The framework is partially interpenetrated (i.e. the second sub-lattice is partially occupied with a ratio 1:0.11). The authors state no attempts were made to model or correct for the solvent in the framework pores. We calculate 15% void space in the structure.	292 K		TEMP: 292 K OTHER-EXP: partially interpenetrated MUF-9 framework formed after reaction in N,N-dibutylformamide for 16h.
NACVUL02	A.Ferguson, Lujia Liu, S.J.Tapperwijn, D.Perl, F.-X.Coudert, S.Van Cleuvenbergen, T.Verbiest, M.A.van der Veen, S.G.Telfer	Nature Chemistry	2016	(C84 H48 N6 O13 Zn4)n,0.70n(C84 H48 N6 O13 Zn4)	catena-[(mu!4$-Oxo)-tris(mu!4$-rac-6,7-diphenyldibenzo[e,g][1,4]diazocine-3,10-dicarboxylato)-tetra-zinc(ii) unknown solvate]	PIP70-MUF-9	yellow	P-43m	215	block	18.97	292	0.894	0.896	The diazocine ligand is disordered with randomly arranged enantiomers and by symmetry. The framework is partially interpenetrated (i.e. the second sub-lattice is partially occupied with a ratio 1:0.70). The authors state no attempts were made to model or correct for the solvent in the framework pores. We calculate 15% void space in the structure.	292 K		TEMP: 292 K OTHER-EXP: partially interpenetrated MUF-9 framework formed after reaction in N,N-dibutylformamide for 40h.
NACVUL03	A.Ferguson, Lujia Liu, S.J.Tapperwijn, D.Perl, F.-X.Coudert, S.Van Cleuvenbergen, T.Verbiest, M.A.van der Veen, S.G.Telfer	Nature Chemistry	2016	(C84 H48 N6 O13 Zn4)n,0.77n(C84 H48 N6 O13 Zn4)	catena-[(mu!4$-Oxo)-tris(mu!4$-rac-6,7-diphenyldibenzo[e,g][1,4]diazocine-3,10-dicarboxylato)-tetra-zinc(ii) unknown solvate]	PIP77-MUF-9	yellow	P-43m	215	block	16.3	292	0.931	0.929	The diazocine ligand is disordered with randomly arranged enantiomers and by symmetry. The framework is partially interpenetrated (i.e. the second sub-lattice is partially occupied with a ratio 1:0.77). The authors state no attempts were made to model or correct for the solvent in the framework pores. We calculate 15% void space in the structure.	292 K		TEMP: 292 K OTHER-EXP: partially interpenetrated MUF-9 framework formed after reaction in N,N-dibutylformamide for 65h.
NACVUL04	A.Ferguson, Lujia Liu, S.J.Tapperwijn, D.Perl, F.-X.Coudert, S.Van Cleuvenbergen, T.Verbiest, M.A.van der Veen, S.G.Telfer	Nature Chemistry	2016	(C84 H48 N6 O13 Zn4)n,0.78n(C84 H48 N6 O13 Zn4)	catena-[(mu!4$-Oxo)-tris(mu!4$-rac-6,7-diphenyldibenzo[e,g][1,4]diazocine-3,10-dicarboxylato)-tetra-zinc(ii) unknown solvate]	PIP78-MUF-9	yellow	P-43m	215	block	13.73	292	0.936	0.937	The diazocine ligand is disordered with randomly arranged enantiomers and by symmetry. The framework is partially interpenetrated (i.e. the second sub-lattice is partially occupied with a ratio 1:0.78). The authors state no attempts were made to model or correct for the solvent in the framework pores. We calculate 15% void space in the structure.	292 K		TEMP: 292 K OTHER-EXP: partially interpenetrated MUF-9 framework formed after reaction in N,N-dibutylformamide for 134h.
NACVUL05	A.Ferguson, Lujia Liu, S.J.Tapperwijn, D.Perl, F.-X.Coudert, S.Van Cleuvenbergen, T.Verbiest, M.A.van der Veen, S.G.Telfer	Nature Chemistry	2016	(C84 H48 N6 O13 Zn4)n,0.71n(C84 H48 N6 O13 Zn4)	catena-[(mu!4$-Oxo)-tris(mu!4$-rac-6,7-diphenyldibenzo[e,g][1,4]diazocine-3,10-dicarboxylato)-tetra-zinc(ii) unknown solvate]	PIP71-MUF-9	yellow	P-43m	215	block	16.42	292	0.899	0.91	The diazocine ligand is disordered with randomly arranged enantiomers and by symmetry. The framework is partially interpenetrated (i.e. the second sub-lattice is partially occupied with a ratio 1:0.71). The authors state no attempts were made to model or correct for the solvent in the framework pores. We calculate 15% void space in the structure.	292 K		TEMP: 292 K OTHER-EXP: partially interpenetrated MUF-9 framework formed after reaction in N,N-diethylformamide for 2h.
NACVUL06	A.Ferguson, Lujia Liu, S.J.Tapperwijn, D.Perl, F.-X.Coudert, S.Van Cleuvenbergen, T.Verbiest, M.A.van der Veen, S.G.Telfer	Nature Chemistry	2016	(C84 H48 N6 O13 Zn4)n,0.52n(C84 H48 N6 O13 Zn4)	catena-[(mu!4$-Oxo)-tris(mu!4$-rac-6,7-diphenyldibenzo[e,g][1,4]diazocine-3,10-dicarboxylato)-tetra-zinc(ii) unknown solvate]	PIP52-MUF-9	yellow	P-43m	215	block	12.49	292	0.799	0.796	The diazocine ligand is disordered with randomly arranged enantiomers and by symmetry. The framework is partially interpenetrated (i.e. the second sub-lattice is partially occupied with a ratio 1:0.52). The authors state no attempts were made to model or correct for the solvent in the framework pores. We calculate 15% void space in the structure.	292 K		TEMP: 292 K OTHER-EXP: partially interpenetrated MUF-9 framework formed after reaction in N,N-dimethylformamide for 8h.
NACVUL07	A.Ferguson, Lujia Liu, S.J.Tapperwijn, D.Perl, F.-X.Coudert, S.Van Cleuvenbergen, T.Verbiest, M.A.van der Veen, S.G.Telfer	Nature Chemistry	2016	(C84 H48 N6 O13 Zn4)n,0.17n(C84 H48 N6 O13 Zn4)	catena-[(mu!4$-Oxo)-tris(mu!4$-rac-6,7-diphenyldibenzo[e,g][1,4]diazocine-3,10-dicarboxylato)-tetra-zinc(ii) unknown solvate]	PIP17-MUF-9	yellow	P-43m	215	block	26.36	292	0.615	0.612	The diazocine ligand is disordered with randomly arranged enantiomers and by symmetry. The framework is partially interpenetrated (i.e. the second sub-lattice is partially occupied with a ratio 1:0.17). The authors state no attempts were made to model or correct for the solvent in the framework pores. We calculate 15% void space in the structure.	292 K		TEMP: 292 K OTHER-EXP: partially interpenetrated MUF-9 framework formed by heating the non-interpenetrated alpha-MUF-9 compound (CCDC 1438077) in N,N-dimethylformamide for 6h.
NACVUL08	A.Ferguson, Lujia Liu, S.J.Tapperwijn, D.Perl, F.-X.Coudert, S.Van Cleuvenbergen, T.Verbiest, M.A.van der Veen, S.G.Telfer	Nature Chemistry	2016	(C84 H48 N6 O13 Zn4)n,0.08n(C84 H48 N6 O13 Zn4)	catena-[(mu!4$-Oxo)-tris(mu!4$-rac-6,7-diphenyldibenzo[e,g][1,4]diazocine-3,10-dicarboxylato)-tetra-zinc(ii) unknown solvate]	PIP8-MUF-9	yellow	P-43m	215	block	11.57	292	0.568	0.566	The diazocine ligand is disordered with randomly arranged enantiomers and by symmetry. The framework is partially interpenetrated (i.e. the second sub-lattice is partially occupied with a ratio 1:0.08). The authors state no attempts were made to model or correct for the solvent in the framework pores. We calculate 15% void space in the structure.	292 K		TEMP: 292 K OTHER-EXP: partially interpenetrated MUF-9 framework formed by heating the non-interpenetrated alpha-MUF-9 compound (CCDC 1438077) in N,N-dimethylformamide for 10h.
NACVUL09	A.Ferguson, Lujia Liu, S.J.Tapperwijn, D.Perl, F.-X.Coudert, S.Van Cleuvenbergen, T.Verbiest, M.A.van der Veen, S.G.Telfer	Nature Chemistry	2016	(C84 H48 N6 O13 Zn4)n,0.06n(C84 H48 N6 O13 Zn4)	catena-[(mu!4$-Oxo)-tris(mu!4$-rac-6,7-diphenyldibenzo[e,g][1,4]diazocine-3,10-dicarboxylato)-tetra-zinc(ii) unknown solvate]	PIP6-MUF-9	yellow	P-43m	215	block	11.77	292	0.557	0.566	The diazocine ligand is disordered with randomly arranged enantiomers and by symmetry. The framework is partially interpenetrated (i.e. the second sub-lattice is partially occupied with a ratio 1:0.06). The authors state no attempts were made to model or correct for the solvent in the framework pores. We calculate 15% void space in the structure.	292 K		TEMP: 292 K OTHER-EXP: partially interpenetrated MUF-9 framework formed by heating the non-interpenetrated alpha-MUF-9 compound (CCDC 1438077) in N,N-dimethylformamide for 12h.
NACVUL10	A.Ferguson, Lujia Liu, S.J.Tapperwijn, D.Perl, F.-X.Coudert, S.Van Cleuvenbergen, T.Verbiest, M.A.van der Veen, S.G.Telfer	Nature Chemistry	2016	(C84 H48 N6 O13 Zn4)n,0.17n(C84 H48 N6 O13 Zn4)	catena-[(mu!4$-Oxo)-tris(mu!4$-rac-6,7-diphenyldibenzo[e,g][1,4]diazocine-3,10-dicarboxylato)-tetra-zinc(ii) unknown solvate]	PIP17-MUF-9	yellow	P-43m	215	block	12.16	292	0.615	0.617	The diazocine ligand is disordered with randomly arranged enantiomers and by symmetry. The framework is partially interpenetrated (i.e. the second sub-lattice is partially occupied with a ratio 1:0.17). The authors state no attempts were made to model or correct for the solvent in the framework pores. We calculate 15% void space in the structure.	crystal a; 292 K		TEMP: 292 K OTHER-EXP: partially interpenetrated MUF-9 framework formed by heating the non-interpenetrated alpha-MUF-9 compound (CCDC 1438077) in N,N-dimethylformamide for 18h. "OTHER-DIFF: crystal a
NACVUL11	A.Ferguson, Lujia Liu, S.J.Tapperwijn, D.Perl, F.-X.Coudert, S.Van Cleuvenbergen, T.Verbiest, M.A.van der Veen, S.G.Telfer	Nature Chemistry	2016	(C84 H48 N6 O13 Zn4)n,0.27n(C84 H48 N6 O13 Zn4)	catena-[(mu!4$-Oxo)-tris(mu!4$-rac-6,7-diphenyldibenzo[e,g][1,4]diazocine-3,10-dicarboxylato)-tetra-zinc(ii) unknown solvate]	PIP27-MUF-9	yellow	P-43m	215	block	15.17	292	0.668	0.668	The diazocine ligand is disordered with randomly arranged enantiomers and by symmetry. The framework is partially interpenetrated (i.e. the second sub-lattice is partially occupied with a ratio 1:0.27). The authors state no attempts were made to model or correct for the solvent in the framework pores. We calculate 15% void space in the structure.	crystal b; 292 K		TEMP: 292 K OTHER-EXP: partially interpenetrated MUF-9 framework formed by heating the non-interpenetrated alpha-MUF-9 compound (CCDC 1438077) in N,N-dimethylformamide for 18h. "OTHER-DIFF: crystal b
NACVUL12	A.Ferguson, Lujia Liu, S.J.Tapperwijn, D.Perl, F.-X.Coudert, S.Van Cleuvenbergen, T.Verbiest, M.A.van der Veen, S.G.Telfer	Nature Chemistry	2016	(C84 H48 N6 O13 Zn4)n,0.20n(C84 H48 N6 O13 Zn4)	catena-[(mu!4$-Oxo)-tris(mu!4$-rac-6,7-diphenyldibenzo[e,g][1,4]diazocine-3,10-dicarboxylato)-tetra-zinc(ii) unknown solvate]	PIP20-MUF-9	yellow	P-43m	215	block	11.61	292	0.631	0.631	The diazocine ligand is disordered with randomly arranged enantiomers and by symmetry. The framework is partially interpenetrated (i.e. the second sub-lattice is partially occupied with a ratio 1:0.20). The authors state no attempts were made to model or correct for the solvent in the framework pores. We calculate 15% void space in the structure.	292 K		TEMP: 292 K OTHER-EXP: partially interpenetrated MUF-9 framework formed by heating the non-interpenetrated alpha-MUF-9 compound (CCDC 1438077) in N,N-dimethylformamide for 21h.
NACVUL13	A.Ferguson, Lujia Liu, S.J.Tapperwijn, D.Perl, F.-X.Coudert, S.Van Cleuvenbergen, T.Verbiest, M.A.van der Veen, S.G.Telfer	Nature Chemistry	2016	(C84 H48 N6 O13 Zn4)n,0.16n(C84 H48 N6 O13 Zn4)	catena-[(mu!4$-Oxo)-tris(mu!4$-rac-6,7-diphenyldibenzo[e,g][1,4]diazocine-3,10-dicarboxylato)-tetra-zinc(ii) unknown solvate]	PIP16-MUF-9	yellow	P-43m	215	block	11.76	292	0.61	0.608	The diazocine ligand is disordered with randomly arranged enantiomers and by symmetry. The framework is partially interpenetrated (i.e. the second sub-lattice is partially occupied with a ratio 1:0.16). The authors state no attempts were made to model or correct for the solvent in the framework pores. We calculate 15% void space in the structure.	292 K		TEMP: 292 K OTHER-EXP: partially interpenetrated MUF-9 framework formed by heating the non-interpenetrated alpha-MUF-9 compound (CCDC 1438077) in N,N-dimethylformamide for 23h.
NACVUL14	A.Ferguson, Lujia Liu, S.J.Tapperwijn, D.Perl, F.-X.Coudert, S.Van Cleuvenbergen, T.Verbiest, M.A.van der Veen, S.G.Telfer	Nature Chemistry	2016	(C84 H48 N6 O13 Zn4)n,0.73n(C84 H48 N6 O13 Zn4)	catena-[(mu!4$-Oxo)-tris(mu!4$-rac-6,7-diphenyldibenzo[e,g][1,4]diazocine-3,10-dicarboxylato)-tetra-zinc(ii) unknown solvate]	PIP73-MUF-9	yellow	P-43m	215	block	12	292	0.909	0.912	Disorder analysis failed.	crystal a; 292 K		TEMP: 292 K OTHER-EXP: partially interpenetrated MUF-9 framework formed by heating the non-interpenetrated alpha-MUF-9 compound (CCDC 1438077) in N,N-dimethylformamide for 24h. "OTHER-DIFF: crystal a
NACVUL15	A.Ferguson, Lujia Liu, S.J.Tapperwijn, D.Perl, F.-X.Coudert, S.Van Cleuvenbergen, T.Verbiest, M.A.van der Veen, S.G.Telfer	Nature Chemistry	2016	(C84 H48 N6 O13 Zn4)n,0.71n(C84 H48 N6 O13 Zn4)	catena-[(mu!4$-Oxo)-tris(mu!4$-rac-6,7-diphenyldibenzo[e,g][1,4]diazocine-3,10-dicarboxylato)-tetra-zinc(ii) unknown solvate]	PIP71-MUF-9	yellow	P-43m	215	block	11.79	292	0.899	0.897	The diazocine ligand is disordered with randomly arranged enantiomers and by symmetry. The framework is partially interpenetrated (i.e. the second sub-lattice is partially occupied with a ratio 1:0.71). The authors state no attempts were made to model or correct for the solvent in the framework pores. We calculate 15% void space in the structure.	crystal b; 292 K		TEMP: 292 K OTHER-EXP: partially interpenetrated MUF-9 framework formed by heating the non-interpenetrated alpha-MUF-9 compound (CCDC 1438077) in N,N-dimethylformamide for 24h. "OTHER-DIFF: crystal b
NACVUL16	A.Ferguson, Lujia Liu, S.J.Tapperwijn, D.Perl, F.-X.Coudert, S.Van Cleuvenbergen, T.Verbiest, M.A.van der Veen, S.G.Telfer	Nature Chemistry	2016	(C84 H48 N6 O13 Zn4)n,0.13n(C84 H48 N6 O13 Zn4)	catena-[(mu!4$-Oxo)-tris(mu!4$-rac-6,7-diphenyldibenzo[e,g][1,4]diazocine-3,10-dicarboxylato)-tetra-zinc(ii) unknown solvate]	PIP13-MUF-9	yellow	P-43m	215	block	11.99	292	0.594	0.596	The diazocine ligand is disordered with randomly arranged enantiomers and by symmetry. The framework is partially interpenetrated (i.e. the second sub-lattice is partially occupied with a ratio 1:0.13). The authors state no attempts were made to model or correct for the solvent in the framework pores. We calculate 15% void space in the structure.	292 K		TEMP: 292 K OTHER-EXP: partially interpenetrated MUF-9 framework formed by heating the non-interpenetrated alpha-MUF-9 compound (CCDC 1438077) in N,N-dimethylformamide for 27h.
NACVUL18	A.Ferguson, Lujia Liu, S.J.Tapperwijn, D.Perl, F.-X.Coudert, S.Van Cleuvenbergen, T.Verbiest, M.A.van der Veen, S.G.Telfer	Nature Chemistry	2016	(C84 H48 N6 O13 Zn4)n,0.1n(C84 H48 N6 O13 Zn4)	catena-[(mu!4$-Oxo)-tris(mu!4$-rac-6,7-diphenyldibenzo[e,g][1,4]diazocine-3,10-dicarboxylato)-tetra-zinc(ii) unknown solvate]	PIP10-MUF-9	yellow	P-43m	215	block	16.09	292	0.578	0.577	The structure is extensively disordered, with the diazocine ligand having randomly arranged enantiomers. The framework is partially interpenetrated (i.e. the second sub-lattice is partially occupied with a ratio 1:0.10). The authors state no attempts were made to model or correct for the solvent in the framework pores. We calculate 15% void space in the structure.	crystal b; 292 K		TEMP: 292 K OTHER-EXP: partially interpenetrated MUF-9 framework formed by reaction in 1% N,N-dimethylformamide in N,N-dibutylformamide "OTHER-DIFF: crystal b
NACVUL19	A.Ferguson, Lujia Liu, S.J.Tapperwijn, D.Perl, F.-X.Coudert, S.Van Cleuvenbergen, T.Verbiest, M.A.van der Veen, S.G.Telfer	Nature Chemistry	2016	(C84 H48 N6 O13 Zn4)n,0.34n(C84 H48 N6 O13 Zn4)	catena-[(mu!4$-Oxo)-tris(mu!4$-rac-6,7-diphenyldibenzo[e,g][1,4]diazocine-3,10-dicarboxylato)-tetra-zinc(ii) unknown solvate]	PIP34-MUF-9	yellow	P-43m	215	block	14.53	292	0.704	0.704	The structure is extensively disordered, with the diazocine ligand having randomly arranged enantiomers. The framework is partially interpenetrated (i.e. the second sub-lattice is partially occupied with a ratio 1:0.34). The authors state no attempts were made to model or correct for the solvent in the framework pores. We calculate 15% void space in the structure.	crystal c; 292 K		TEMP: 292 K OTHER-EXP: partially interpenetrated MUF-9 framework formed by reaction in 4% N,N-dimethylformamide in N,N-dibutylformamide "OTHER-DIFF: crystal c
[truncated: 982 more rows]
